# Supplementary material
Source: PubMed Central journal article supplement (PMC7124983)
Supplement: NIHMS1554700-supplement-Supp_info.pdf [file NIHMS1554700-supplement-Supp_info.pdf]

## Table of Contents

|                                                                                      |      |
|--------------------------------------------------------------------------------------|------|
| A. General Experimental Information.....                                             | S2   |
| B. $\alpha,\beta$ -Unsaturated Nitrile Substrate Synthesis and Characterization..... | S4   |
| C. C-20 Methyl Substrate Synthesis and Characterization.....                         | S21  |
| D. Cobalt Catalyzed Bicyclizations and Product Characterization.....                 | S30  |
| E. X-Ray Crystallography Data.....                                                   | S48  |
| F. $^1\text{H}$ , $^{13}\text{C}$ , 2D NMR and Mass Spectra.....                     | S84  |
| G. References.....                                                                   | S215 |

## ***A. General Experimental Information***

All reactions were performed in oven-dried (120 °C) or flame-dried glassware under an atmosphere of dry argon unless otherwise noted. Reaction solvents including dichloromethane (CH<sub>2</sub>Cl<sub>2</sub>, Fisher, HPLC Grade), hexanes (Fisher, HPLC Grade), diethyl ether (Et<sub>2</sub>O, Fisher, BHT stabilized, HPLC Grade), benzene (C<sub>6</sub>H<sub>6</sub>, Fisher, HPLC Grade), tetrahydrofuran (THF, Fisher, HPLC Grade), and toluene (PhCH<sub>3</sub>, Fisher, HPLC Grade) were dried by percolation through a column packed with neutral alumina and a column packed with Q5 reactant, a supported copper catalyst for scavenging oxygen, under a positive pressure of argon. Solvents for workup and chromatography were: hexanes (Fisher or EMD, ACS Grade), EtOAc (Fisher, ACS Grade), dichloromethane (CH<sub>2</sub>Cl<sub>2</sub>, Fisher, ACS Grade), and diethyl ether (Fisher, ACS Grade). Column chromatography was performed using EMD Millipore 60 Å (0.040–0.063 mm) mesh silica gel (SiO<sub>2</sub>). Analytical and preparatory thin-layer chromatography was performed on Merck silica gel 60 F254 TLC plates. Visualization was accomplished with UV (254 or 210 nm), and *p*-anisaldehyde, vanillin, potassium permanganate, 2,4-dinitrophenylhydrazine, or ceric ammonium molybdate and heat as developing agents. Chloroform-d (CDCl<sub>3</sub>, D 99.8%, DLM-7) was purchased from Cambridge Isotope Laboratories. K<sub>2</sub>CO<sub>3</sub> (anhydrous, 99%, Alfa Aesar), NaHCO<sub>3</sub> (ACS grade, Fisher), NaOH (ACS grade, Macron or Fisher), Na<sub>2</sub>S<sub>2</sub>O<sub>3</sub> (ACS grade, Fisher), triethylamine (Et<sub>3</sub>N, EMD, CaH<sub>2</sub>) and pyridine (Alfa Aesar, CaH<sub>2</sub>), were distilled from the indicated drying agents prior to use. Proton and carbon magnetic resonance spectra (<sup>1</sup>H NMR and <sup>13</sup>C NMR) were recorded at 298K on a Bruker CRYO500 (500 MHz, <sup>1</sup>H; 125 MHz, <sup>13</sup>C) or a Bruker AVANCE600 (600 MHz, <sup>1</sup>H; 151 MHz, <sup>13</sup>C) spectrometer with solvent resonance as the internal standard (<sup>1</sup>H NMR: CHCl<sub>3</sub> at 7.26 ppm, <sup>13</sup>C NMR: CDCl<sub>3</sub> at 77.16 ppm). <sup>1</sup>H NMR data are reported as follows: chemical shift, multiplicity (s = singlet, d = doublet, t = triplet, q = quartet, dd = doublet of doublets, ddd = doublet of doublet of doublets, td = triplet of doublets, tdd = triplet of doublet of doublets, qd = quartet of doublets, m = multiplet, br. s. = broad singlet), coupling constants (Hz), and integration. High resolution mass spectra (HRMS) were recorded on a Waters LCT Premier spectrometer using ESI-TOF (electrospray ionization-time of flight) and data

are reported in the form of (m/z). To quantify the extent of deuterium incorporation, the purified samples were analyzed by isotope ratio mass spectrometry modeling (flow injection analysis). Catalysts **C1**<sup>[1]</sup>, **C2**<sup>[2]</sup>, **C3**<sup>[3]</sup>, **C4**<sup>[4]</sup> and **C5**<sup>[5]</sup> were prepared as described in the literature and used without further purification.

### B. $\alpha,\beta$ -Unsaturated Nitrile Substrate Synthesis and Characterization

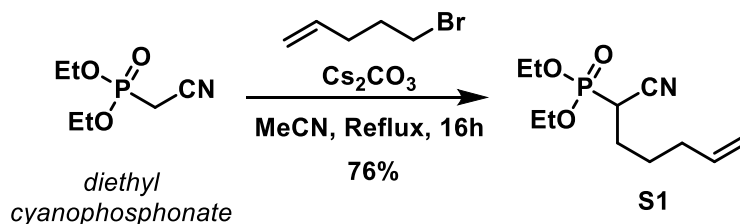

To a solution of diethyl cyanophosphonate (1.77 g, 10.0 mmol, 1.0 equiv.) in MeCN (36 mL) was added Cs<sub>2</sub>CO<sub>3</sub> (3.26 g, 10 mmol, 1.0 equiv.) followed by 5-bromo-1-pentene (1.80 g, 12.1 mmol, 1.2 equiv.). The resulting suspension was heated to reflux for 16 h, cooled to ambient temperature and the volatiles were removed *in vacuo*. The resulting residue was partitioned between H<sub>2</sub>O (20 mL) and EtOAc (40 mL) and the aqueous phase was extracted with EtOAc (3 x 20 mL). The combined organic extracts were washed with brine, dried over Na<sub>2</sub>SO<sub>4</sub>, filtered and concentrated *in vacuo*. The resulting crude residue was purified via flash column chromatography using a mixture of MeOH/ DCM (2:98) as eluent to give **S1** as a colorless oil (1.86 g, 7.60 mmol, 76% yield). <sup>1</sup>H NMR (500 MHz, CDCl<sub>3</sub>) δ 5.76 (ddt, *J* = 16.9, 10.1, 6.7 Hz, 1H), 5.03 (dd, *J* = 17.1, 1.6 Hz, 1H), 4.99 (d, *J* = 10.2 Hz, 1H), 4.28 – 4.15 (m, 4H), 2.89 (ddd, *J* = 23.7, 10.3, 4.7 Hz, 1H), 2.17 – 2.04 (m, 2H), 1.96 – 1.82 (m, 2H), 1.81 – 1.73 (m, 1H), 1.63 – 1.52 (m, 1H), 1.37 (t, *J* = 7.1 Hz, 6H); <sup>13</sup>C NMR (126 MHz, CDCl<sub>3</sub>) δ 137.3, 116.3 (d, *J* = 9.3 Hz), 115.8, 64.2 (d, *J* = 7.0 Hz), 63.8 (d, *J* = 6.8 Hz), 32.8, 30.0 (d, *J* = 143.8 Hz), 27.1 (d, *J* = 12.2 Hz), 26.5 (d, *J* = 4.3 Hz), 16.50 (d, *J* = 2.5 Hz), 16.46 (d, *J* = 2.5 Hz); HRMS (ES+) *m/z* calc'd for C<sub>11</sub>H<sub>20</sub>NO<sub>3</sub>PH [M + H]<sup>+</sup>: 246.1259, found 246.1259.



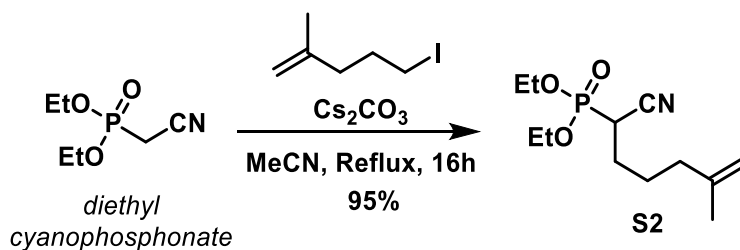

To a solution of diethyl cyanophosphonate (1.32 g, 7.48 mmol, 1.0 equiv.) in MeCN (30 mL) was added Cs<sub>2</sub>CO<sub>3</sub> (2.44 g, 7.48 mmol, 1.0 equiv.) followed by 5-iodo-2-methylpent-1-ene<sup>[6]</sup> (1.90 g, 9.05 mmol, 1.2 equiv.). The resulting suspension was heated to reflux for 16 h, then the volatiles were removed *in vacuo*. The resulting residue was partitioned between H<sub>2</sub>O (20 mL) and EtOAc (40 mL) and the aqueous phase was extracted with EtOAc (3 x 20 mL). The combined organic extracts were washed with brine, dried over Na<sub>2</sub>SO<sub>4</sub>, filtered and concentrated *in vacuo*. The resulting crude residue was purified via flash column chromatography using a mixture of EtOAc/ hexanes (35:65) as eluent to give **S2** as a colorless oil (1.84 g, 7.09 mmol, 95% yield). <sup>1</sup>H NMR (600 MHz, CDCl<sub>3</sub>) δ 4.74 (s, 1H), 4.69 (s, 1H), 4.28 – 4.18 (m, 4H), 2.91 (ddd, *J* = 23.7, 10.1, 4.6 Hz, 1H), 2.14 – 2.02 (m, 2H), 1.93 – 1.79 (m, 3H), 1.71 (s, 3H), 1.65 – 1.58 (m, 1H), 1.38 (t, *J* = 7.1 Hz, 6H); <sup>13</sup>C NMR (151 MHz, CDCl<sub>3</sub>) δ 144.4, 116.4 (d, *J* = 9.3 Hz), 111.1, 64.2 (d, *J* = 7.0 Hz), 63.8 (d, *J* = 6.8 Hz), 36.9, 30.1 (d, *J* = 143.7 Hz), 26.6 (d, *J* = 4.3 Hz), 25.7 (d, *J* = 12.2 Hz), 22.3, 16.53 (d, *J* = 3.3 Hz), 16.50 (d, *J* = 3.3 Hz); HRMS (ES<sup>+</sup>) *m/z* calc'd for C<sub>12</sub>H<sub>22</sub>NO<sub>3</sub>PNa [M + Na]<sup>+</sup>: 282.1235, found 282.1233.

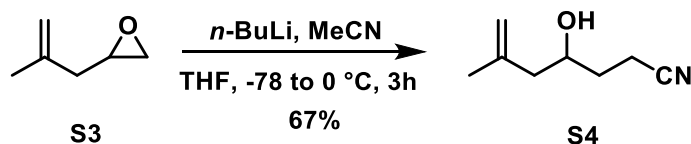

To a solution of acetonitrile (2.24 mL, 41.1 mmol, 2.0 equiv.) in THF (70 mL) was added a 1.6 M solution of *n*-butyllithium (18.7 mL, 30.0 mmol, 1.4 equiv.) in hexanes at –78 °C. The resulting solution was stirred for 1 h, then a solution of epoxide **S3**<sup>[7]</sup> (2.1 g, 21.4 mmol, 1.0 equiv.) in THF (10 mL) was added over a period of 3 minutes. The mixture was warmed to 0 °C, stirred for 3 hours and then quenched with satd. NH<sub>4</sub>Cl<sub>(aq)</sub> (30 mL). The aqueous phase was extracted with EtOAc (3 x 20 mL), the combined

organic extracts were washed with brine, dried over Na<sub>2</sub>SO<sub>4</sub>, filtered and concentrated *in vacuo*. The resulting crude residue was purified via flash column chromatography using a mixture of EtOAc/ hexanes (30:70) as eluent to give **S4** as a colorless oil (2.00 g, 14.3 mmol, 67% yield). <sup>1</sup>H NMR (600 MHz, CDCl<sub>3</sub>) δ 4.93 (s, 1H), 4.82 (s, 1H), 3.84 (tt, *J* = 9.2, 3.4 Hz, 1H), 2.54 (td, *J* = 7.1, 3.9 Hz, 2H), 2.21 (dd, *J* = 13.6, 3.6 Hz, 1H), 2.14 (dd, *J* = 13.6, 9.3 Hz, 1H), 1.89 – 1.82 (m, 2H), 1.77 (s, 3H), 1.75 – 1.68 (m, 1H); <sup>13</sup>C NMR (151 MHz, CDCl<sub>3</sub>) δ 141.8, 120.0, 114.5, 66.6, 46.2, 32.5, 22.5, 13.9; HRMS (ES+) *m/z* calc'd for C<sub>16</sub>H<sub>26</sub>N<sub>2</sub>O<sub>2</sub>Na [2M +Na]<sup>+</sup>: 301.1892, found 301.1892.

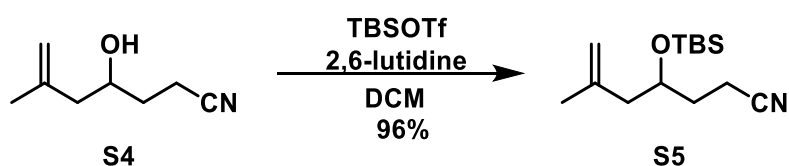

To a solution of alcohol **S4** (2.00 g, 14.3 mmol, 1.0 equiv.) and 2,6-lutidine (5.00 mL, 43.2 mmol, 3.0 equiv.) in DCM (20 mL) was added TBSOTf (4.96 mL, 21.6 mmol, 1.5 equiv.). The mixture stirred for 1 hour at ambient temperature, then methanol (5.0 mL) was added. The volatiles were removed *in vacuo*, and the resulting crude residue was directly purified via flash chromatography using a mixture of EtOAc/hexanes (10:90) as eluent to give silyl ether **S5** as a colorless oil (3.52 g, 90%). <sup>1</sup>H NMR (600 MHz, CDCl<sub>3</sub>) δ 4.80 (s, 1H), 4.72 (s, 1H), 4.01 – 3.82 (m, 1H), 2.46 – 2.34 (m, 2H), 2.28 (dd, *J* = 13.6, 4.9 Hz, 1H), 2.12 (dd, *J* = 13.6, 8.3 Hz, 1H), 1.91 – 1.82 (m, 1H), 1.73 (s, 3H), 1.66 (td, *J* = 14.1, 6.9 Hz, 1H), 0.89 (s, 9H), 0.09 (s, 3H), 0.09 (s, 3H); <sup>13</sup>C NMR (126 MHz, CDCl<sub>3</sub>) δ 141.8, 120.1, 113.9, 68.8, 46.0, 32.0, 25.9, 23.0, 18.1, 13.2, -4.2, -4.7; HRMS (ES+) *m/z* calc'd for C<sub>14</sub>H<sub>27</sub>NOSiNa [M +Na]<sup>+</sup>: 276.1760, found 276.1764.

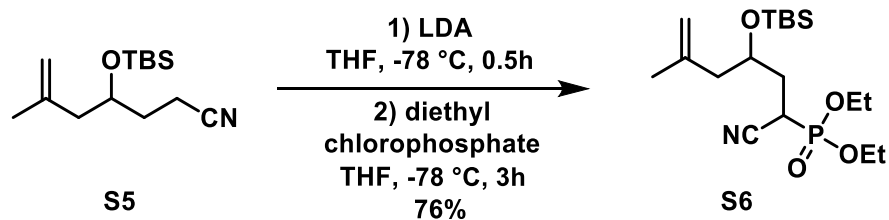

To a solution of diisopropylamine (2.08 mL, 14.7 mmol, 2.2 equiv.) in THF (25 mL) was added a 1.6 M solution of *n*-butyllithium (8.79 mL, 14.1 mmol, 2.1 equiv.) at  $-78\text{ }^{\circ}\text{C}$ . The mixture was allowed to warm to  $0\text{ }^{\circ}\text{C}$ , stirred for 30 minutes and cooled back down to  $-78\text{ }^{\circ}\text{C}$ . A solution of nitrile **S5** (1.7 g, 6.7 mmol, 1.0 equiv.) in THF (5 mL) was added dropwise and the mixture was stirred for 30 minutes at  $-78\text{ }^{\circ}\text{C}$ . Diethyl chlorophosphate (1.07 mL, 7.37 mmol, 1.1 equiv.) was added dropwise (neat). After stirring for 3 hours at  $-78\text{ }^{\circ}\text{C}$ , satd.  $\text{NH}_4\text{Cl}_{(\text{aq})}$  (30 mL) was added to the reaction mixture. The aqueous phase was extracted with EtOAc (3 x 20 mL), the combined organic extracts were washed with brine, dried over  $\text{Na}_2\text{SO}_4$ , filtered and concentrated *in vacuo*. The resulting crude residue was purified via flash column chromatography, using a mixture of EtOAc/hexanes (30:70) as eluent to give an inconsequential mixture (2:1) of cyanophosphonate **S6** diastereomers as a colorless oil (1.98 g, 5.1 mmol, 76% yield). *Note: signals are reported for the major diastereomer only.*  $^1\text{H NMR}$  (600 MHz,  $\text{CDCl}_3$ )  $\delta$ 4.81 (*major-s*, 1H), 4.74 (*major-s*, 1H), 4.29 – 4.18 (*overlapping m*, 4H), 4.05 – 3.99 (*major-m*, 1H), 3.17 (*overlapping -ddd*,  $J = 23.2, 12.4, 3.3\text{ Hz}$ , 1H), 2.38 (*major-dd*,  $J = 13.6, 4.0\text{ Hz}$ , 1H), 2.27 (*major-qd*,  $J = 13.7, 6.5\text{ Hz}$ , 1H), 2.15 (*overlapping- dd*,  $J = 13.6, 9.0\text{ Hz}$ , 1H), 2.03 – 1.92 (*overlapping m*, 1H), 1.83 – 1.76 (*major-m*, 1H), 1.74 (*major- s*, 3H), 1.37 (*overlapping- t*,  $J = 7.1\text{ Hz}$ , 6H), 0.89 (*overlapping- s*, 9H), 0.14 (*major-s*, 3H), 0.12 (*major-s*, 3H);  $^{13}\text{C NMR}$  (126 MHz,  $\text{CDCl}_3$ )  $\delta$ 141.19 (*major*), 116.24 (*major-d*,  $J = 9.3\text{ Hz}$ ), 114.07 (*major*), 67.93 (d,  $J = 13.8\text{ Hz}$ ), 64.04 (*major-d*,  $J = 6.9\text{ Hz}$ ), 63.72 (*major-d*,  $J = 6.8\text{ Hz}$ ), 46.48 (*major*), 33.78 (*major-d*,  $J = 4.0\text{ Hz}$ ), 26.96 (*major-d*,  $J = 145.5\text{ Hz}$ ), 25.85 (*overlapping*), 22.85 (*major*), 18.01 (*major*), 16.41 (*overlapping-d*,  $J = 3.2\text{ Hz}$ ), 16.37 (*overlapping-d*,  $J = 3.2\text{ Hz}$ ),  $-4.05$  (*major*),  $-4.77$  (*major*); **HRMS** (ES+)  $m/z$  calc'd for  $\text{C}_{18}\text{H}_{36}\text{NO}_4\text{PSiNa}$   $[\text{M} + \text{Na}]^+$ : 412.2044, found 412.2036.

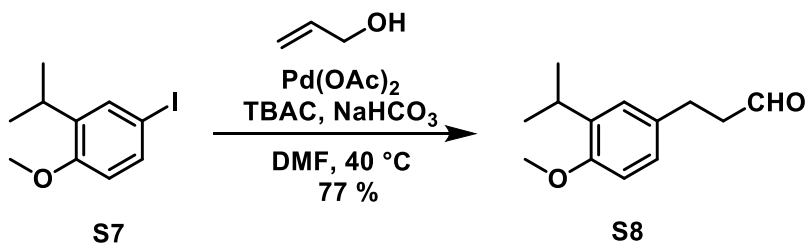

To a solution of iodoanisole **S7**<sup>[8]</sup> (3.50 g, 12.7 mmol, 1.0 equiv.) in degassed DMF (50 mL) was added tetrabutylammonium chloride (3.53 g, 12.7 mmol, 1.0 equiv.), allyl alcohol (1.72 mL, 25.4 mmol, 2.0 equiv.), sodium bicarbonate (2.67 g, 31.8 mmol, 2.5 equiv.), and finally Pd(OAc)<sub>2</sub> (144 mg, 0.64 mmol, 0.05 equiv.). The resulting mixture was stirred at 40 °C for 6 hours, then Et<sub>2</sub>O (80 mL) was added and the organic phases were washed with DI H<sub>2</sub>O (3x 30 mL). The combined organic extracts were washed with brine (30 mL), dried over Na<sub>2</sub>SO<sub>4</sub>, filtered and concentrated *in vacuo*. The crude residue was purified via flash column chromatography (EtOAc/hexanes 4:96) to give aldehyde **S8** as a clear yellow oil (2.02 g, 9.78 mmol, 77% yield). **<sup>1</sup>H NMR** (600 MHz, CDCl<sub>3</sub>) δ 9.83 (s, 1H), 7.03 (s, 1H), 6.98 (d, *J* = 8.3 Hz, 1H), 6.78 (d, *J* = 8.3 Hz, 1H), 3.81 (s, 3H), 3.30 (septet, *J* = 6.9 Hz, 1H), 2.91 (t, *J* = 7.6 Hz, 2H), 2.76 (t, *J* = 7.6 Hz, 2H), 1.21 (d, *J* = 7.0 Hz, 6H); **<sup>13</sup>C NMR** (151 MHz, CDCl<sub>3</sub>) δ 202.1, 155.5, 137.3, 132.2, 126.2, 126.1, 110.6, 55.6, 45.8, 27.7, 26.9, 22.8 (2C); **HRMS** (ES<sup>+</sup>) *m/z* calc'd for C<sub>13</sub>H<sub>18</sub>O<sub>2</sub>Na [M + Na]<sup>+</sup>: 229.1205, found 229.1209.

General Procedure A (HWE reaction for the synthesis of  $\alpha,\beta$ -unsaturated nitrile substrates):

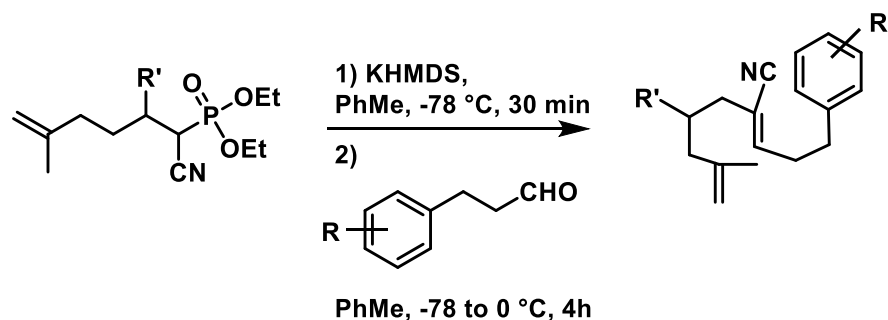

To a cooled ( $-78\text{ }^{\circ}\text{C}$ ) solution of cyanophosphonate **S1**, **S2** or **S6** (1.5 mmol, 1.0 equiv.) in dry toluene (15 mL) was added dropwise a solution of KHMDS (3.0 mL, 1.0 equiv., 0.5 M in toluene). After stirring for at least 30 min at  $-78\text{ }^{\circ}\text{C}$ , a solution of aldehyde (1.5 mmol, 1.0 equiv.) was added dropwise in dry toluene (15 mL). The resulting solution was stirred at  $-78\text{ }^{\circ}\text{C}$  for 1 h then allowed to warm to  $0\text{ }^{\circ}\text{C}$  and stirred for 3 h. Then, satd.  $\text{NH}_4\text{Cl}_{(\text{aq})}$  (10 mL) was added and the aqueous layer was extracted with  $\text{Et}_2\text{O}$  (3 x 20 mL). The combined organic extracts were washed with brine, dried over  $\text{Na}_2\text{SO}_4$ , filtered and concentrated *in vacuo*. The resulting crude residue was purified via flash column chromatography on  $\text{SiO}_2$ , using a mixture of  $\text{Et}_2\text{O}$ /hexanes or  $\text{EtOAc}$ /hexanes as eluent.

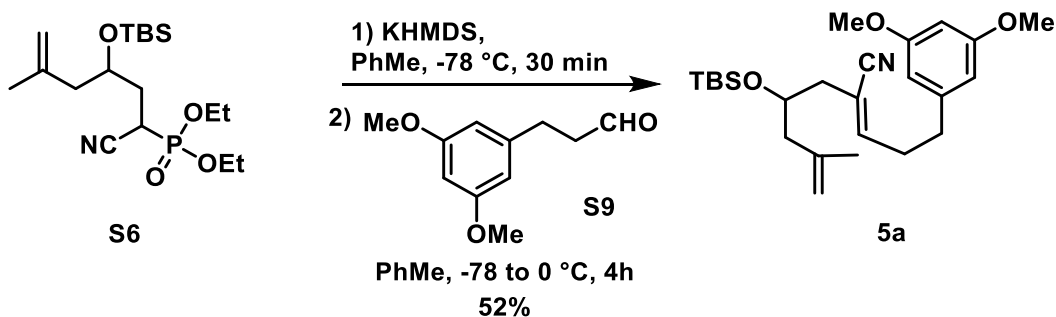

Prepared according to general procedure A, using cyanophosphonate **S6** (2.62 mmol) and aldehyde **S9**<sup>[9]</sup> (2.75 mmol) to give a 1:4 (*E*:*Z*) mixture of  $\alpha,\beta$ -unsaturated nitriles. Yield of **5a**: 52% (586 mg, 1.36 mmol, colorless oil) of *Z*;  $R_f = 0.15$  (3:97  $\text{EtOAc}$ /hexanes);  $^1\text{H NMR}$  (500 MHz,  $\text{CDCl}_3$ )  $\delta$  6.34 (d,  $J = 2.1\text{ Hz}$ , 2H), 6.32 (t,  $J = 2.2\text{ Hz}$ , 1H), 6.16 (t,  $J = 6.0\text{ Hz}$ , 1H), 4.79 (s, 1H), 4.69 (s, 1H), 3.98 (tt,  $J = 7.4$ ,

5.3 Hz, 1H), 3.78 (s, 6H), 2.75 – 2.62 (m, 4H), 2.37 (dd,  $J = 14.0, 4.0$  Hz, 1H), 2.20 (dd,  $J = 13.9, 5.0$  Hz, 1H), 2.17 (dd,  $J = 14.1, 7.6$  Hz, 1H), 2.10 (dd,  $J = 13.6, 7.4$  Hz, 1H), 1.73 (s, 3H), 0.87 (s, 9H), 0.06 (s, 3H), 0.05 (s, 3H);  $^{13}\text{C}$  NMR (126 MHz,  $\text{CDCl}_3$ )  $\delta$  161.1, 149.1, 142.7, 142.1, 117.8, 113.9, 112.8, 106.6, 98.4, 69.0, 55.4, 46.0, 41.7, 35.0, 33.0, 26.0, 23.1, 18.2, -4.4, -4.5; HRMS (ES+)  $m/z$  calc'd for  $\text{C}_{25}\text{H}_{39}\text{NO}_3\text{SiNa}$  [ $\text{M} + \text{Na}$ ] $^+$ : 452.2597, found 452.2599.

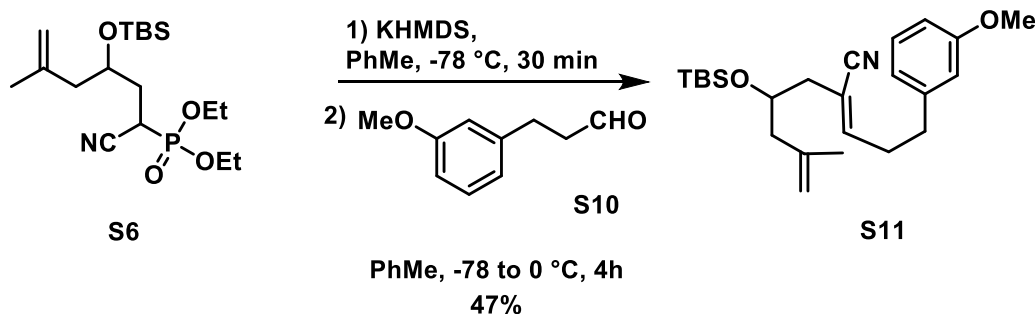

Prepared according to general procedure A, using cyanophosphonate **S6** (1.16 mmol) and aldehyde **S10**<sup>[10]</sup> (1.22 mmol) to give a 1:4 (*E*:*Z*) mixture of  $\alpha,\beta$ -unsaturated nitriles. Yield of **S11**: 47% (218 mg, 0.545 mmol, colorless oil) of *Z*;  $R_f=0.15$  (2:98 EtOAc/hexanes);  $^1\text{H}$  NMR (500 MHz,  $\text{CDCl}_3$ )  $\delta$  7.21 (t,  $J = 7.8$  Hz, 1H), 6.80 – 6.72 (m, 3H), 6.16 (t,  $J = 7.0$  Hz, 1H), 4.80 (s, 1H), 4.69 (s, 1H), 3.98 (tt,  $J = 7.5, 4.9$  Hz, 1H), 3.80 (s, 3H), 2.77 – 2.65 (m, 4H), 2.37 (dd,  $J = 14.0, 4.1$  Hz, 1H), 2.21 (dd,  $J = 13.9, 5.6$  Hz, 1H), 2.17 (dd,  $J = 14.2, 7.8$  Hz, 1H), 2.11 (dd,  $J = 13.6, 7.4$  Hz, 1H), 1.73 (s, 3H), 0.87 (s, 9H), 0.06 (s, 3H), 0.05 (s, 3H);  $^{13}\text{C}$  NMR (126 MHz,  $\text{CDCl}_3$ )  $\delta$  159.9, 149.1, 142.1, 142.0, 129.7, 120.9, 117.8, 114.3, 113.9, 112.8, 111.8, 69.0, 55.3, 46.0, 41.7, 34.8, 33.1, 26.0, 23.1, 18.2, -4.4, -4.5; HRMS (ES+)  $m/z$  calc'd for  $\text{C}_{24}\text{H}_{37}\text{NO}_2\text{SiNa}$  [ $\text{M} + \text{Na}$ ] $^+$ : 422.2491, found 422.2484.

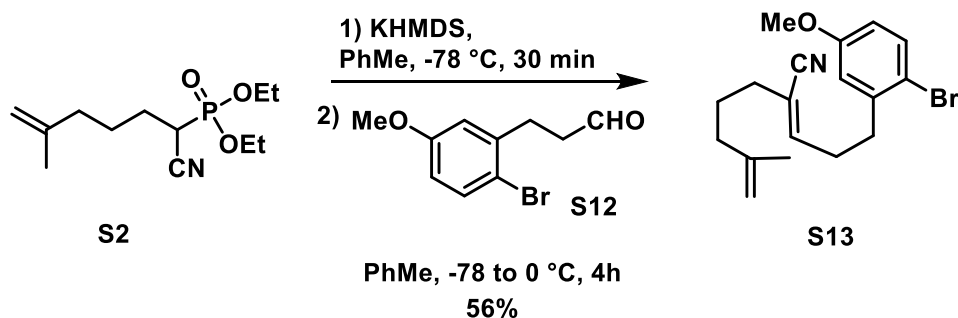

Prepared according to general procedure A, using cyanophosphonate **S2** (2.06 mmol) and aldehyde **S12**<sup>[11]</sup> (2.06 mmol) to give a 1:4 (*E*:*Z*) mixture of  $\alpha,\beta$ -unsaturated nitriles. Yield of **S13**: 56% (401 mg, 1.15 mmol, colorless oil) of *Z*;  $R_f=0.15$  (3:97 EtOAc/hexanes);  $^1\text{H NMR}$  (500 MHz,  $\text{CDCl}_3$ )  $\delta$  7.41 (d,  $J = 8.8$  Hz, 1H), 6.77 (d,  $J = 2.8$  Hz, 1H), 6.65 (dd,  $J = 8.7, 2.9$  Hz, 1H), 6.17 (t,  $J = 7.6$  Hz, 1H), 4.73 (s, 1H), 4.66 (s, 1H), 3.78 (s, 3H), 2.84 (t,  $J = 7.5$  Hz, 2H), 2.72 – 2.66 (m, 2H), 2.18 (t,  $J = 7.6$  Hz, 2H), 1.99 (t,  $J = 7.5$  Hz, 2H), 1.71 (s, 3H), 1.68 – 1.61 (m, 2H);  $^{13}\text{C NMR}$  (126 MHz,  $\text{CDCl}_3$ )  $\delta$  159.2, 146.1, 144.8, 140.6, 133.6, 117.5, 116.2, 115.7, 114.9, 113.9, 110.8, 55.6, 36.7, 35.2, 33.8, 31.7, 25.9, 22.3; **HRMS** (ES+)  $m/z$  calc'd for  $\text{C}_{18}\text{H}_{22}\text{BrNONa}$  [ $\text{M} + \text{Na}$ ]<sup>+</sup>: 370.0782, found 370.0775.

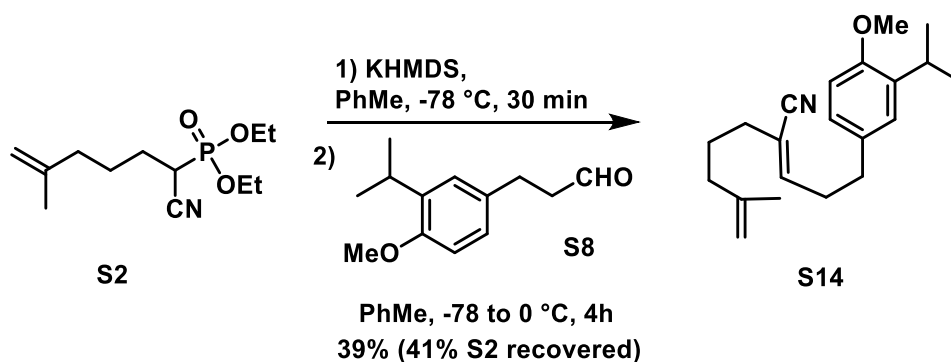

Prepared according to general procedure A, using cyanophosphonate **S2** (4.12 mmol) and aldehyde **S8** (4.12 mmol) to give a 1:4 (*E*:*Z*) mixture of  $\alpha,\beta$ -unsaturated nitriles. Yield of **S14**: 39% (41% recovered SM) of *Z* (500 mg, 1.61 mmol, colorless oil);  $R_f = 0.15$  (2:98 EtOAc/hexanes);  $^1\text{H NMR}$  (600 MHz,  $\text{CDCl}_3$ )  $\delta$  7.01 (s, 1H), 6.97 (d,  $J = 8.2$  Hz, 1H), 6.78 (d,  $J = 8.2$  Hz, 1H), 6.14 (t,  $J = 7.2$  Hz, 1H), 4.73 (s, 1H), 4.65 (s, 1H), 3.81 (s, 3H), 3.31 (septet,  $J = 6.9$  Hz, 1H), 2.73 – 2.63 (m, 4H), 2.17 (t,  $J = 7.5$  Hz, 2H), 1.97 (t,  $J = 7.5$  Hz, 2H), 1.70 (s, 3H), 1.67 – 1.61 (m, 2H), 1.21 (d,  $J = 6.9$  Hz, 6H);  $^{13}\text{C NMR}$  (151 MHz,  $\text{CDCl}_3$ )  $\delta$  155.4, 147.1, 144.8, 137.2, 132.2, 126.3, 126.2, 117.7, 115.1, 110.8, 110.5, 55.6, 36.6, 34.3, 33.7, 33.4, 26.9, 25.9, 22.8, 22.3; **HRMS** (ES+)  $m/z$  calc'd for  $\text{C}_{21}\text{H}_{29}\text{NONa}$  [ $\text{M} + \text{Na}$ ]<sup>+</sup>: 334.2147, found 334.2153.

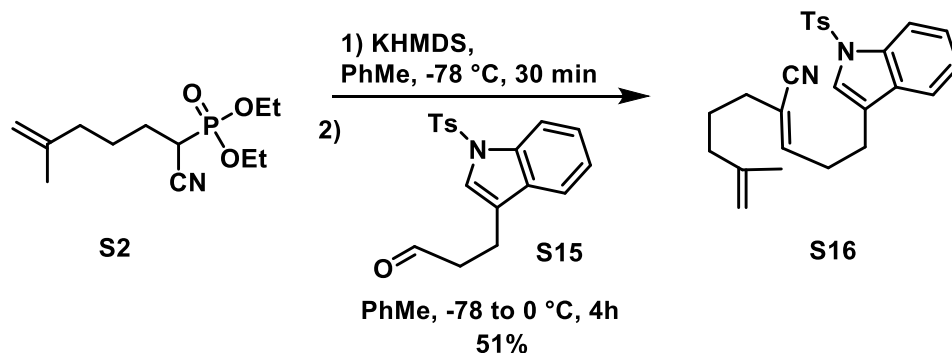

Prepared according to general procedure A, using cyanophosphonate **S2** (0.77 mmol) and aldehyde **S15**<sup>[12]</sup> (0.77 mmol) to give a 1:4 (E:Z) mixture of  $\alpha,\beta$ -unsaturated nitriles. Yield: 51% of **S16** (170 mg, 0.39 mmol, off-white solid);  $R_f=0.15$  (8:92 EtOAc/hexanes)  $^1\text{H NMR}$  (600 MHz,  $\text{CDCl}_3$ )  $\delta$  7.89 (d,  $J = 8.3$  Hz, 1H), 7.65 (d,  $J = 7.8$  Hz, 2H), 7.38 (d,  $J = 7.8$  Hz, 1H), 7.26 (s, 1H), 7.22 (t,  $J = 7.7$  Hz, 1H), 7.14 (t,  $J = 8.0$  Hz, 1H), 7.11 (d,  $J = 8.0$  Hz, 2H), 6.05 (t,  $J = 7.4$  Hz, 1H), 4.63 (s, 1H), 4.55 (s, 1H), 2.71 (t,  $J = 7.3$  Hz, 2H), 2.66 – 2.61 (m, 2H), 2.23 (s, 3H), 2.06 (t,  $J = 7.6$  Hz, 2H), 1.89 (t,  $J = 7.4$  Hz, 2H), 1.60 (s, 3H), 1.53 – 1.50 (m, 2H);  $^{13}\text{C NMR}$  (151 MHz,  $\text{CDCl}_3$ )  $\delta$  146.2, 145.0, 144.7, 135.4, 130.7, 130.0, 126.9, 125.0, 123.3, 123.0, 121.4, 119.4, 117.5, 115.8, 113.9, 110.9, 36.7, 33.7, 31.0, 25.9, 24.2, 22.3, 21.7; **HRMS** (ES+)  $m/z$  calc'd for  $\text{C}_{26}\text{H}_{28}\text{N}_2\text{O}_2\text{SNa}$   $[\text{M} + \text{Na}]^+$ : 455.1769, found 455.1774.

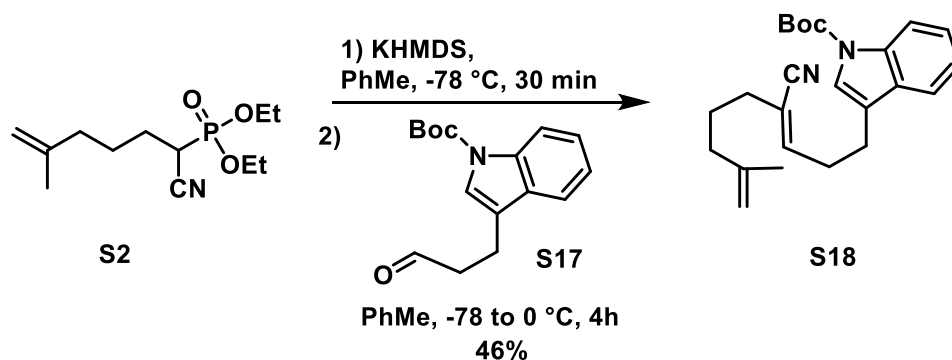

Prepared according to general procedure A, using cyanophosphonate **S2** (1.16 mmol) and aldehyde **S17**<sup>[13]</sup> (1.16 mmol) to give a 1:4 (E:Z) mixture of  $\alpha,\beta$ -unsaturated nitriles. Yield: 46% of **S18** (200 mg,



0.53 mmol, off-white solid);  $R_f=0.15$  (5:95 EtOAc/hexanes)  $^1\text{H NMR}$  (500 MHz,  $\text{CDCl}_3$ )  $\delta$  8.14 (br s, 1H), 7.52 (d,  $J = 7.7$  Hz, 1H), 7.39 (s, 1H), 7.32 (ddd,  $J = 7.2, 7.2, 1.1$  Hz, 1H), 7.25 (ddd, 7.2, 7.2, 1.1, 1H), 6.20 (t,  $J = 7.3$  Hz, 1H), 4.72 (s, 1H), 4.65 (s, 1H), 2.85 (dd,  $J = 7.8, 6.8$  Hz, 2H), 2.78 (dd,  $J = 14.5, 7.0$  Hz, 2H), 2.18 (t,  $J = 7.6$  Hz, 2H), 1.99 (t,  $J = 7.5$  Hz, 2H), 1.70 (s, 3H), 1.67 (s, 9H), 1.69-1.62 (m, 2H);  $^{13}\text{C NMR}$  (126 MHz,  $\text{CDCl}_3$ ) (Note: *mixture of rotamers*)  $\delta$  149.8 (broad), 146.8 (broad), 144.7, 135.7 (broad), 130.4, 124.6, 122.8, 122.6, 119.3, 118.9, 117.6, 115.53, 115.45, 110.9, 83.7, 36.7, 33.7, 31.1, 28.4, 25.9, 24.2, 22.3; **HRMS** (ES+)  $m/z$  calc'd for  $\text{C}_{24}\text{H}_{31}\text{N}_2\text{O}_2$   $[\text{M} + \text{H}]^+$ : 379.2386, found 379.2373.

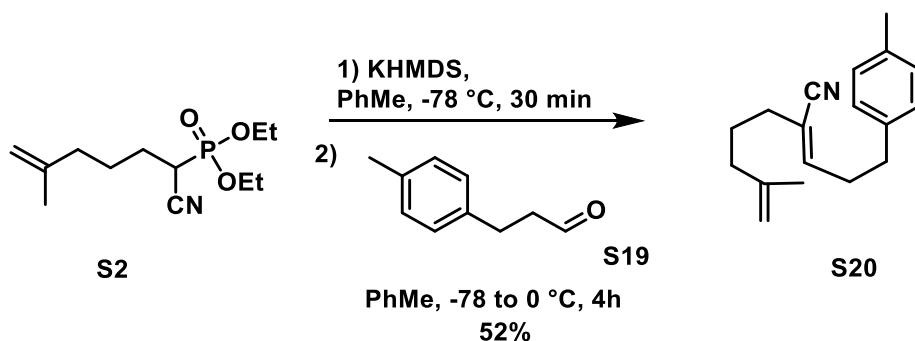

Prepared according to general procedure A, using cyanophosphonate **S2** (1.54 mmol) and aldehyde **S19**<sup>[14]</sup> (1.54 mmol) to give a 1:4 (*E:Z*) mixture of  $\alpha,\beta$ -unsaturated nitriles. Yield: 52% of **S20** (203 mg, 0.80 mmol, colorless oil);  $R_f=0.15$  (2:97  $\text{Et}_2\text{O}$ /hexanes);  $^1\text{H NMR}$  (500 MHz,  $\text{CDCl}_3$ )  $\delta$  7.11 (d,  $J = 8.0$  Hz, 2H), 7.08 (d,  $J = 8.1$  Hz, 2H), 6.13 (t,  $J = 7.3$  Hz, 1H), 4.74 (s, 1H), 4.66 (s, 1H), 2.73 (dd,  $J = 11.0, 4.3$  Hz, 2H), 2.67 (dd,  $J = 14.4, 7.1$  Hz, 2H), 2.33 (s, 3H), 2.17 (t,  $J = 7.5$  Hz, 2H), 1.98 (t,  $J = 7.5$  Hz, 2H), 1.71 (s, 3H), 1.68 – 1.60 (m, 2H);  $^{13}\text{C NMR}$  (126 MHz,  $\text{CDCl}_3$ )  $\delta$  146.9, 144.8, 137.2, 135.9, 129.3, 128.4, 117.7, 115.3, 110.8, 36.6, 34.5, 33.7, 33.2, 25.9, 22.3, 21.1; **HRMS** (ES+)  $m/z$  calc'd for  $\text{C}_{18}\text{H}_{23}\text{NNa}$   $[\text{M} + \text{Na}]^+$ : 276.1728, found 276.1731.

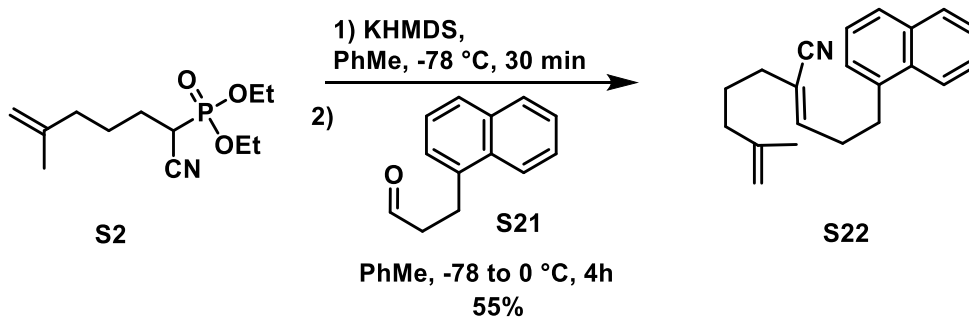

Prepared according to general procedure A, using cyanophosphonate **S2** (1.16 mmol) and aldehyde **S21**<sup>[15]</sup> (1.05 mmol) to give a 1:4 (*E:Z*) mixture of  $\alpha,\beta$ -unsaturated nitriles. Yield: 55% of **S22** (183 mg, 0.63 mmol, colorless oil);  $R_f=0.15$  (2:98 Et<sub>2</sub>O/Hexanes); <sup>1</sup>H NMR (600 MHz, CDCl<sub>3</sub>)  $\delta$  8.04 (d,  $J = 8.4$  Hz, 1H), 7.88 (d,  $J = 8.1$  Hz, 1H), 7.76 (d,  $J = 8.2$  Hz, 1H), 7.55 (t,  $J = 7.2$  Hz, 1H), 7.50 (t,  $J = 7.4$  Hz, 1H), 7.42 (t,  $J = 7.6$  Hz, 1H), 7.34 (d,  $J = 6.9$  Hz, 1H), 6.21 (t,  $J = 7.6$  Hz, 1H), 4.75 (s, 1H), 4.67 (s, 1H), 3.23 (t,  $J = 7.6$  Hz, 2H), 2.84 (dd,  $J = 15.2, 7.6$  Hz, 2H), 2.18 (t,  $J = 7.6$  Hz, 2H), 1.99 (t,  $J = 7.5$  Hz, 2H), 1.72 (s, 3H), 1.68 – 1.61 (m, 2H); <sup>13</sup>C NMR (151 MHz, CDCl<sub>3</sub>)  $\delta$  146.7, 144.8, 136.4, 134.0, 131.8, 129.0, 127.3, 126.3, 126.2, 125.8, 125.6, 123.6, 117.6, 115.4, 110.8, 36.7, 33.8, 32.4, 32.0, 25.9, 22.3; HRMS (ES+)  $m/z$  calc'd for C<sub>21</sub>H<sub>23</sub>NNa [M + Na]<sup>+</sup>: 312.1728, found 312.1729.

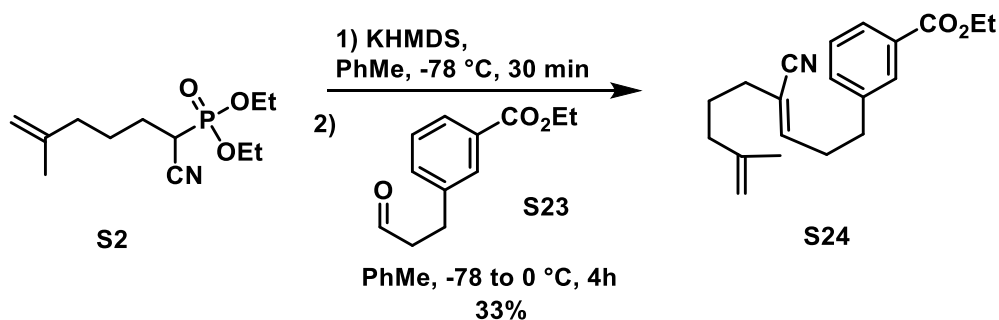

Prepared according to general procedure A, using cyanophosphonate **S2** (1.54 mmol) and aldehyde **S23**<sup>[16]</sup> (1.54 mmol) to give a 1:4 (*E:Z*) mixture of  $\alpha,\beta$ -unsaturated nitriles. Yield: 33% of **S24** (157 mg, 0.50 mmol, colorless oil);  $R_f=0.15$  (15:85 Et<sub>2</sub>O/hexanes); <sup>1</sup>H NMR (500 MHz, CDCl<sub>3</sub>)  $\delta$  7.93 – 7.88 (m, 1H), 7.86 (s, 1H), 7.41 – 7.36 (m, 2H), 6.12 (t,  $J = 7.5$  Hz, 1H), 4.72 (s, 1H), 4.64 (s, 1H), 4.38 (q,  $J = 7.1$  Hz, 2H), 2.82 (t,  $J = 7.5$  Hz, 2H), 2.73 – 2.68 (m, 2H), 2.16 (t,  $J = 7.6$  Hz, 2H), 1.96 (t,  $J = 7.5$  Hz, 2H),

1.69 (s, 3H), 1.67 – 1.59 (m, 2H), 1.40 (t,  $J = 7.1$  Hz, 3H);  $^{13}\text{C}$  NMR (126 MHz,  $\text{CDCl}_3$ )  $\delta$  166.7, 146.1, 144.7, 140.6, 133.0, 130.9, 129.6, 128.7, 127.8, 117.5, 115.9, 110.9, 61.1, 36.6, 34.7, 33.7, 32.9, 25.9, 22.3, 14.5; HRMS (ES+)  $m/z$  calc'd for  $\text{C}_{20}\text{H}_{25}\text{NO}_2\text{H}$   $[\text{M} + \text{H}]^+$ : 312.1964, found 312.1961.

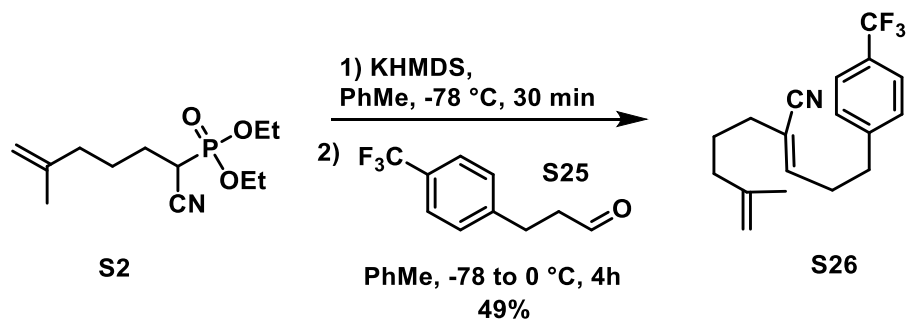

Prepared according to general procedure A, using cyanophosphonate **S2** (1.16 mmol) and aldehyde **S25**<sup>[17]</sup> (1.05 mmol) to give a 1:4 (*E*:*Z*) mixture of  $\alpha,\beta$ -unsaturated nitriles. Yield: 49% of **S26** (174 mg, 0.57 mmol, colorless oil);  $R_f=0.15$  (4:96  $\text{Et}_2\text{O}$ /hexanes);  $^1\text{H}$  NMR (600 MHz,  $\text{CDCl}_3$ )  $\delta$  7.56 (d,  $J = 8.0$  Hz, 2H), 7.30 (d,  $J = 7.9$  Hz, 2H), 6.11 (t,  $J = 7.5$  Hz, 1H), 4.73 (s, 1H), 4.64 (s, 1H), 2.83 (t,  $J = 7.5$  Hz, 2H), 2.72 – 2.69 (m, 2H), 2.17 (t,  $J = 7.5$  Hz, 2H), 1.97 (t,  $J = 7.5$  Hz, 2H), 1.69 (s, 3H), 1.66 – 1.60 (m, 2H);  $^{13}\text{C}$  NMR (151 MHz,  $\text{CDCl}_3$ )  $\delta$  145.8, 144.7, 144.4, 128.9 (q,  $J = 32.4$  Hz), 128.9 (2C), 125.6 (q,  $J = 3.7$  Hz, 2C), 124.4 (q,  $J = 271.8$  Hz), 117.5, 116.1, 110.9, 36.6, 34.7, 33.7, 32.7, 25.8, 22.3; HRMS (ES+)  $m/z$  calc'd for  $\text{C}_{18}\text{H}_{20}\text{F}_3\text{NNa}$   $[\text{M} + \text{Na}]^+$ : 330.1446, found 330.1442.

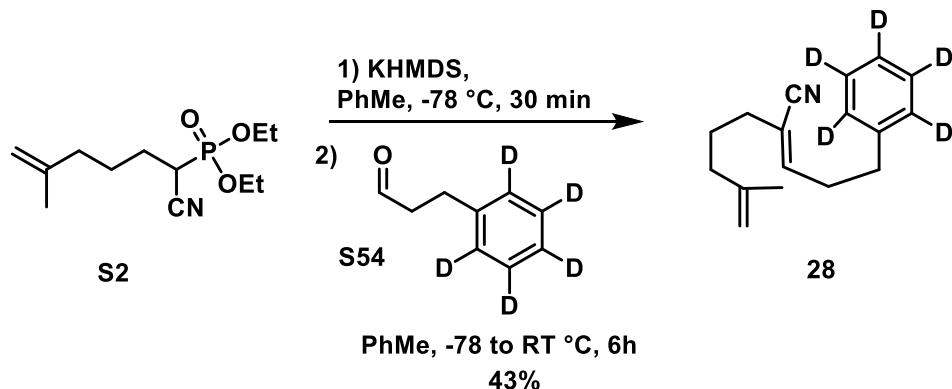

Prepared according to general procedure A, using cyanophosphonate **S2** (1.44 mmol) and aldehyde **S54**<sup>[18]</sup> (1.44 mmol) to give a 1:8 (*E*:*Z*) mixture of  $\alpha,\beta$ -unsaturated nitriles. Yield: 43% of **28** (151 mg, 0.62 mmol, colorless oil);  $R_f=0.15$  (1.5:98.5 EtOAc/Hexanes);  $^1\text{H NMR}$  (600 MHz,  $\text{CDCl}_3$ )  $\delta$  6.13 (t,  $J = 7.5$  Hz, 1H), 4.73 (s, 1H), 4.65 (s, 1H), 2.77 (t,  $J = 7.5$  Hz, 2H), 2.69 (dd,  $J = 14.9, 7.4$  Hz, 2H), 2.17 (t,  $J = 7.5$  Hz, 2H), 1.98 (t,  $J = 7.5$  Hz, 2H), 1.70 (s, 3H), 1.67 – 1.61 (m, 2H);  $^{13}\text{C DEPTQ NMR}$  (151 MHz,  $\text{CDCl}_3$ )  $\delta$  146.7, 144.8, 140.1, 128.1(t,  $J = 24.3$  Hz, 2C), 128.1(t,  $J = 24.3$  Hz, 2C), 125.9 (t,  $J = 24.3$  Hz), 117.6, 115.4, 110.8, 36.6, 34.8, 33.7, 33.1, 25.9, 22.3; **HRMS** (ES+)  $m/z$  calc'd for  $\text{C}_{17}\text{H}_{16}\text{D}_5\text{NNa}$  [ $\text{M} + \text{Na}$ ] $^+$ : 267.1885, found 267.1884.

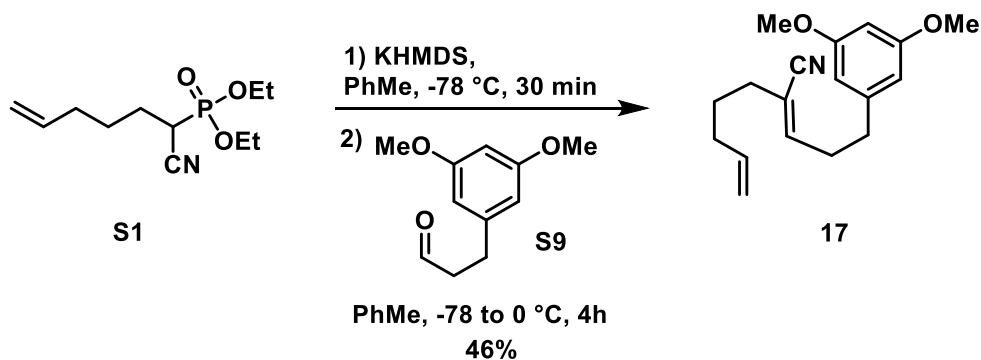

Prepared according to general procedure A, using cyanophosphonate **S1** (1.63 mmol) and aldehyde **S9**<sup>[9]</sup> (1.48 mmol) to give a 1:4 (*E*:*Z*) mixture of  $\alpha,\beta$ -unsaturated nitriles. Yield: 46% of **17** (215 mg, 0.75 mmol, colorless oil);  $R_f=0.15$  (3:97 EtOAc/hexanes);  $^1\text{H NMR}$  (500 MHz,  $\text{CDCl}_3$ )  $\delta$  6.35 – 6.31 (m, 3H), 6.11 (t,  $J = 6.8$  Hz, 1H), 5.75 (ddt,  $J = 17.0, 10.2, 6.7$  Hz, 1H), 5.03 – 4.95 (m, 2H), 3.78 (s, 6H), 2.75 –

2.64 (m, 4H), 2.18 (t,  $J = 7.5$  Hz, 2H), 2.01 (q,  $J = 7.1$  Hz, 2H), 1.65 – 1.54 (m, 2H);  $^{13}\text{C}$  NMR (126 MHz,  $\text{CDCl}_3$ )  $\delta$  161.0, 146.7, 142.7, 137.8, 117.7, 115.5, 115.3, 106.6, 98.4, 55.4, 35.1, 33.6, 32.7, 32.6, 27.2; **HRMS** (ES+)  $m/z$  calc'd for  $\text{C}_{18}\text{H}_{23}\text{NO}_2\text{H}$  [ $\text{M} + \text{H}$ ] $^+$ : 286.1807, found 286.1805. Yield: 14% of *E*-isomer (64 mg, 0.22 mmol, colorless oil);  $R_f=0.15$  (4:96 EtOAc/hexanes);  $^1\text{H}$  NMR (600 MHz,  $\text{CDCl}_3$ )  $\delta$  6.35 (t,  $J = 7.6$  Hz, 1H), 6.33 (s, 1H), 6.30 (s, 2H), 5.75 (td,  $J = 16.7, 6.9$  Hz, 1H), 5.04– 4.96 (m, 2H), 3.78 (s, 6H), 2.66 (t,  $J = 7.5$  Hz, 2H), 2.48 (q,  $J = 7.5$  Hz, 2H), 2.14 (t,  $J = 7.6$  Hz, 2H), 2.04 (q,  $J = 6.9$  Hz, 2H), 1.59 – 1.52 (m, 2H);  $^{13}\text{C}$  NMR (151 MHz,  $\text{CDCl}_3$ )  $\delta$  161.1, 146.9, 142.7, 137.7, 120.0, 115.5, 115.3, 106.7, 98.3, 55.4, 34.9, 32.9, 30.2, 28.0, 27.1; **HRMS** (ES+)  $m/z$  calc'd for  $\text{C}_{18}\text{H}_{23}\text{NO}_2\text{Na}$  [ $\text{M} + \text{Na}$ ] $^+$ : 308.1627, found 308.1631.

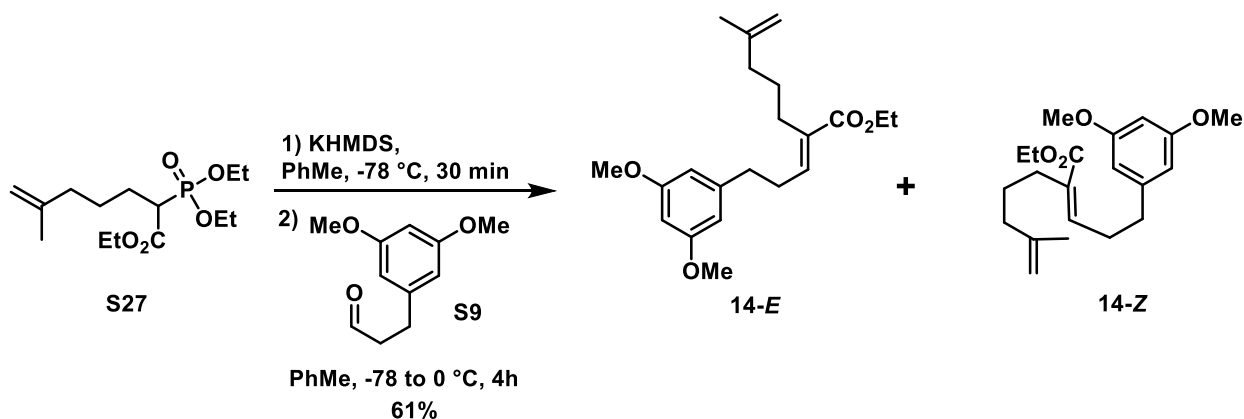

Prepared according to general procedure A, using phosphonoacetate **S27**<sup>[19]</sup> (0.849 mmol) and aldehyde **S9**<sup>[9]</sup> (1.02 mmol) to give a 1:4 (*E*:*Z*) mixture of  $\alpha,\beta$ -unsaturated nitriles. Yield: 48% of **14-E** (140 mg, 0.40 mmol, colorless oil) of *E*;  $R_f=0.15$  (2:98 EtOAc/hexanes);  $^1\text{H}$  NMR (500 MHz,  $\text{CDCl}_3$ )  $\delta$  6.78 (t,  $J = 7.4$  Hz, 1H), 6.35 (d,  $J = 2.1$  Hz, 2H), 6.32 (t,  $J = 2.2$  Hz, 1H), 4.70 (s, 1H), 4.67 (s, 1H), 4.19 (q,  $J = 7.1$  Hz, 2H), 3.78 (s, 6H), 2.69 (t,  $J = 7.8$  Hz, 2H), 2.50 – 2.48 (m, 2H), 2.28 – 2.23 (m, 2H), 2.00 (t,  $J = 7.6$  Hz, 2H), 1.70 (s, 3H), 1.51 – 1.44 (m, 2H), 1.29 (t,  $J = 7.1$  Hz, 3H);  $^{13}\text{C}$  NMR (126 MHz,  $\text{CDCl}_3$ )  $\delta$  168.0, 161.0, 145.7, 143.8, 141.3, 133.2, 110.1, 106.6, 98.2, 60.5, 55.4, 37.8, 35.5, 30.5, 27.2, 26.6, 22.5, 14.4; **HRMS** (ES+)  $m/z$  calc'd for  $\text{C}_{21}\text{H}_{31}\text{O}_4$  [ $\text{M} + \text{H}$ ] $^+$ : 347.2222, found 347.2217.

Yield: 13% of **14-Z** (38 mg, 0.11 mmol, colorless oil);  $R_f=0.16$  (2:98 EtOAc/hexanes);  $^1\text{H NMR}$  (500 MHz,  $\text{CDCl}_3$ )  $\delta$  6.36 (d,  $J = 2.2$  Hz, 2H), 6.30 (t,  $J = 2.2$  Hz, 1H), 5.87 (t,  $J = 7.1$  Hz, 1H), 4.70 (s, 1H), 4.65 (s, 1H), 4.20 (q,  $J = 7.1$  Hz, 2H), 3.77 (s, 6H), 2.76 – 2.70 (m, 2H), 2.70 – 2.64 (m, 2H), 2.25 – 2.19 (m, 2H), 1.99 (t,  $J = 7.6$  Hz, 2H), 1.70 (s, 3H), 1.58 – 1.50 (m, 2H), 1.30 (t,  $J = 7.1$  Hz, 3H);  $^{13}\text{C NMR}$  (126 MHz,  $\text{CDCl}_3$ )  $\delta$  168.2, 160.9, 145.7, 144.1, 140.3, 132.9, 110.2, 106.7, 98.1, 60.2, 55.4, 37.3, 36.0, 34.3, 31.0, 27.1, 22.5, 14.5; **HRMS** (ES+)  $m/z$  calc'd for  $\text{C}_{21}\text{H}_{30}\text{O}_4\text{Na}$   $[\text{M} + \text{Na}]^+$ : 369.2042, found 369.2029.

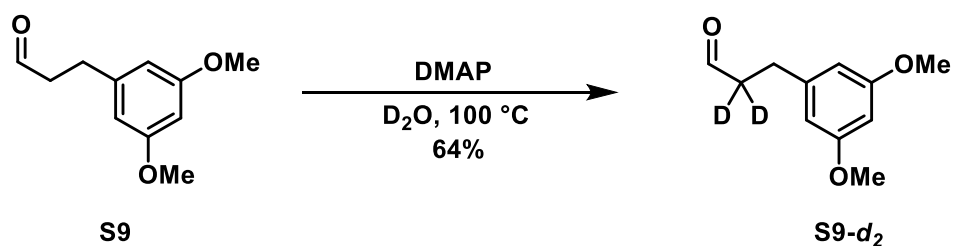

A sealed tube charged with a magnetic stirring bar, aldehyde **S9** (250 mg, 1.29 mmol), DMAP (16 mg, 0.13 mmol), and heavy water (0.50 ml) was heated to 100 °C for 2h. After cooling to room temperature, the suspension was extracted with diethyl ether (3 x 2 mL), the combined organic extracts were washed with brine (2 mL), dried over  $\text{Na}_2\text{SO}_4$ , filtered and concentrated *in vacuo*. The resulting crude residue was purified via flash column chromatography on  $\text{SiO}_2$ , using a mixture of EtOAc/ hexanes (2:8) as eluent to give  $\alpha$ -d<sub>2</sub> aldehyde **S9-d<sub>2</sub>** as a colorless oil (161 mg, 0.82 mmol, 64% yield – *ca.* ~90% deuteration at the  $\alpha$ -position estimated by  $^1\text{H NMR}$ );  $^1\text{H NMR}$  (500 MHz,  $\text{CDCl}_3$ )  $\delta$  9.82 (s, 1H), 6.34 (d,  $J = 2.2$  Hz, 2H), 6.32 (t,  $J = 2.2$  Hz, 1H), 3.77 (s, 6H), 2.88 (s, 2H);  $^{13}\text{C NMR}$  (151 MHz,  $\text{CDCl}_3$ )  $\delta$  201.8, 161.1, 142.8, 106.5, 98.2, 55.4, 44.6 (pent,  $J = 19.5$  Hz), 28.4; **HRMS** (ES+)  $m/z$  calc'd for  $\text{C}_{11}\text{H}_{13}\text{D}_2\text{O}_3$   $[\text{M} + \text{H}]^+$ : 197.1147, found 197.1149.

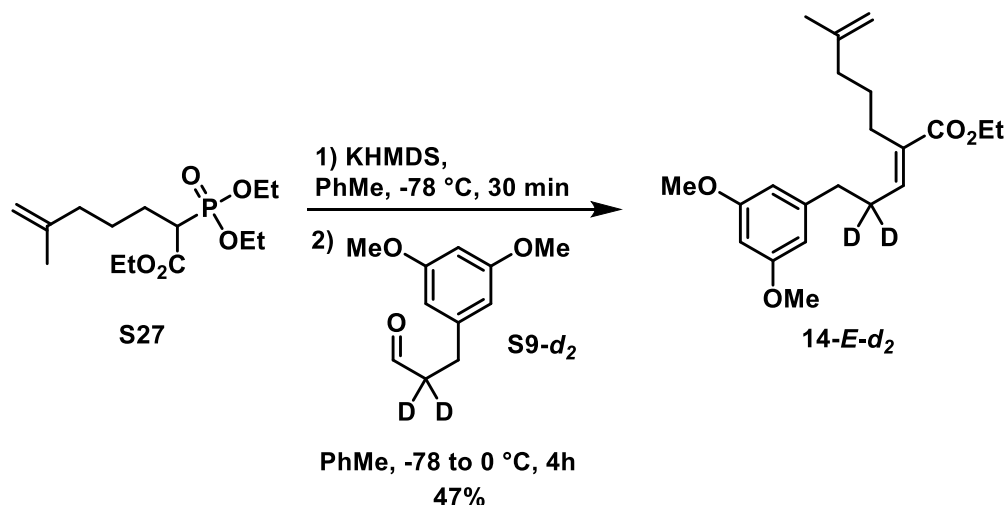

Prepared according to *general procedure A*, using phosphonoacetate **S27**<sup>[19]</sup> (0.97 mmol) and aldehyde **S9-d<sub>2</sub>** (0.97 mmol) to give a 5:1 (*E*:*Z*) mixture of  $\alpha,\beta$ -unsaturated nitriles. Yield: 47% of **14-E-d<sub>2</sub>** (160 mg, 0.46 mmol, colorless oil) of *E*;  $R_f=0.15$  (2:98 EtOAc/hexanes - *ca.* ~90% deuteration at the  $\alpha$ -position estimated by <sup>1</sup>H NMR); <sup>1</sup>H NMR (600 MHz, CDCl<sub>3</sub>)  $\delta$  6.84 (s, 1H), 6.40 (s, 2H), 6.37 (s, 1H), 4.76 (s, 1H), 4.73 (s, 1H), 4.24 (q,  $J = 7.1$  Hz, 2H), 3.83 (s, 6H), 2.73 (s, 2H), 2.34 – 2.29 (m, 2H), 2.06 (t,  $J = 7.6$  Hz, 2H), 1.76 (s, 3H), 1.54 (dd,  $J = 15.4, 7.7$  Hz, 2H), 1.35 (t,  $J = 7.1$  Hz, 3H); <sup>13</sup>C NMR (151 MHz, CDCl<sub>3</sub>)  $\delta$  167.9, 160.9, 145.6, 143.7, 141.1, 133.2, 110.1, 106.5, 98.1, 60.4, 55.3, 37.7, 35.3, 29.7 (pent,  $J = 19.5$  Hz) 27.1, 26.5, 22.4, 14.4; HRMS (ES<sup>+</sup>)  $m/z$  calc'd for C<sub>21</sub>H<sub>28</sub>D<sub>2</sub>O<sub>4</sub>Na [M + Na]<sup>+</sup>: 371.2167, found 371.2171.

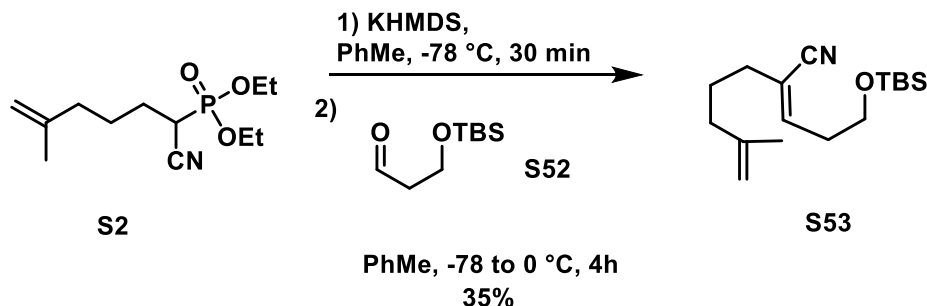

Prepared according to *general procedure A*, using cyanophosphonate **S2** (0.77 mmol) and aldehyde **S52**<sup>[20]</sup> (0.77 mmol) to give a 1:8 (*E*:*Z*) mixture of  $\alpha,\beta$ -unsaturated nitriles. Yield: 35% of **S53** (80 mg,

0.27 mmol, colorless oil);  $R_f=0.15$  (1:99 EtOAc/hexanes);  $^1\text{H NMR}$  (500 MHz,  $\text{CDCl}_3$ )  $\delta$  6.23 (t,  $J = 7.5$  Hz, 1H), 4.73 (s, 1H), 4.67 (s, 1H), 3.70 (t,  $J = 6.1$  Hz, 2H), 2.55 (dd,  $J = 13.3, 6.3$  Hz, 2H), 2.20 (t,  $J = 7.6$  Hz, 2H), 2.03 (t,  $J = 7.5$  Hz, 2H), 1.71 (s, 3H), 1.71 – 1.64 (m, 2H), 0.89 (s, 9H), 0.05 (s, 6H);  $^{13}\text{C DEPTQ NMR}$  (151 MHz,  $\text{CDCl}_3$ )  $\delta$  145.0, 144.8, 117.7, 116.0, 110.8, 61.6, 36.7, 35.1, 33.8, 26.1, 26.0, 25.9, 22.3, -5.3; **HRMS** (GG-CI)  $m/z$  calc'd for  $\text{C}_{17}\text{H}_{32}\text{NOSiH}$   $[\text{M} + \text{H}]^+$ : 294.2253, found 294.2263.

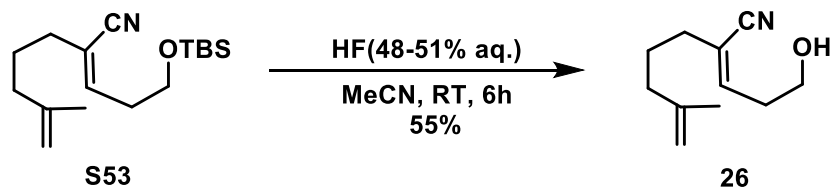

To a solution of silyl ether **S53** (80 mg, 0.27 mmol) in acetonitrile (1.0 mL) was added a solution of HF in water (48-51%, 0.10 mL). After stirring for 6 hours at room temperature, the mixture was diluted with water (3 mL) and extracted with EtOAc (3 x 5 mL). The combined organic extracts were washed with brine (2 mL), dried over  $\text{Na}_2\text{SO}_4$ , filtered and carefully concentrated *in vacuo* (*caution: the product is volatile*). The resulting crude residue was purified via flash column chromatography on  $\text{SiO}_2$ , using a mixture of EtOAc/ hexanes (3:7) as eluent to give alcohol **26** as a colorless oil (27 mg, 0.15 mmol, 55% yield);  $^1\text{H NMR}$  (600 MHz,  $\text{CDCl}_3$ )  $\delta$  6.25 (t,  $J = 7.5$  Hz, 1H), 4.73 (s, 1H), 4.67 (s, 1H), 3.74 (t,  $J = 6.1$  Hz, 1H), 2.60 (q,  $J = 6.6$  Hz, 1H), 2.22 (t,  $J = 7.6$  Hz, 1H), 2.02 (t,  $J = 7.5$  Hz, 1H), 1.78 (s, 1H), 1.70 (s, 1H), 1.71 – 1.65 (m, 1H);  $^{13}\text{C DEPTQ NMR}$  (151 MHz,  $\text{CDCl}_3$ )  $\delta$  144.7, 144.3, 117.7, 116.8, 110.9, 61.3, 36.7, 34.9, 33.8, 25.8, 22.3; **HRMS** (ES+)  $m/z$  calc'd for  $\text{C}_{11}\text{H}_{17}\text{NONa}$   $[\text{M} + \text{Na}]^+$ : 202.1208, found 202.1208.



### C. C-20 Methyl Substrate Synthesis and Characterization

General Procedure B (copper catalyzed allylic substitution):

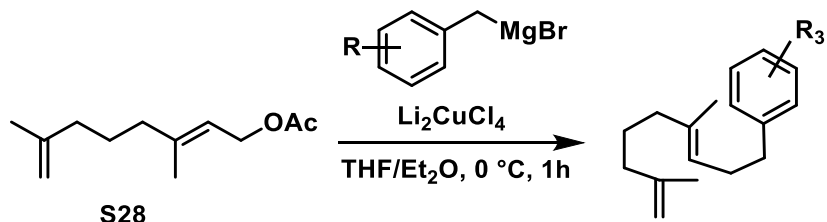

Grignard reagents were prepared from corresponding benzylic chlorides (or bromides) as follows: A suspension of activated Mg<sup>0</sup> turnings (2.0 equiv.) in Et<sub>2</sub>O was cooled to 0 °C, and the benzyl halide (1.0 equiv., ~1.0M) was added slowly enough to maintain the reaction temperature under 20 °C. The resulting suspension was stirred vigorously at ambient temperature for 1 hour prior to use. Concentrations were determined using salicylaldehyde phenylhydrazone as titrant, and generally gave 1.0–1.2M solutions.

To an ice-cold solution of allylic acetate **S28**<sup>[21]</sup> (1.00 mmol, 1 equiv.) in THF (0.5 mL) was added a 1.0 M solution of Li<sub>2</sub>CuCl<sub>4</sub> (0.10 mmol, 0.1 equiv.). The resulting mixture was stirred for 10 minutes and a solution of freshly prepared benzylic Grignard reagent (2.0 mmol, 2.0 equiv., ~ 1.0M in Et<sub>2</sub>O) was added dropwise. After stirring for 2 hours at 0 °C, the reaction mixture was quenched with satd. NH<sub>4</sub>Cl<sub>(aq)</sub> (10 mL) and stirred for 1 hour while warming to ambient temperature. The aqueous phase was extracted with Et<sub>2</sub>O (3 x 20 mL), then the combined organic extracts were washed with brine, dried over Na<sub>2</sub>SO<sub>4</sub>, filtered and concentrated *in vacuo*. The resulting crude residue was purified via flash column chromatography on SiO<sub>2</sub>, using a mixture of Et<sub>2</sub>O/ hexanes as eluent (NOTE: *the products contained ~11% of the inseparable trisubstituted alkene isomer, since S28 contained ~11% of geraniol acetate*).

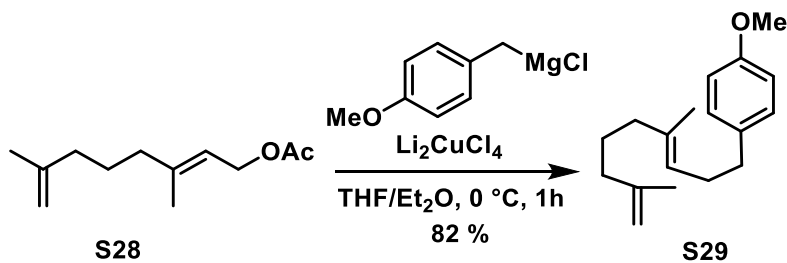

Prepared according to general procedure B, using allylic acetate **S28** (2.36 mmol) and *p*-methoxybenzyl chloride (4.71 mmol) to give a 89:11 mixture of alkene isomers. Yield: 82% of **S29** (501 mg, 1.94 mmol, colorless oil);  $R_f=0.30$  (2:98 EtOAc/hexanes);  $^1\text{H NMR}$  (500 MHz,  $\text{CDCl}_3$ )  $\delta$  7.10 (d,  $J = 8.6$  Hz, 2H), 6.82 (d,  $J = 8.6$  Hz, 2H), 5.17 (td,  $J = 7.0, 1.2$  Hz, 1H), 4.70 (s, 1H), 4.66 (s, 1H), 3.79 (s, 3H), 2.60 – 2.56 (m, 2H), 2.27 (dd,  $J = 15.2, 7.4$  Hz, 2H), 1.98-1.93 (m, 4H), 1.71 (s, 3H), 1.54 (s, 3H), 1.53 – 1.49 (m, 2H);  $^{13}\text{C NMR}$  (126 MHz,  $\text{CDCl}_3$ )  $\delta$  157.8, 146.3, 135.8, 134.7, 129.5, 124.0, 113.8, 109.8, 55.4, 39.4, 37.5, 35.4, 30.3, 26.1, 22.6, 16.0; ; **HRMS** (ES+)  $m/z$  calc'd for  $\text{C}_{18}\text{H}_{26}\text{O}$   $[\text{M}]^+$ : 258.1984, found 258.1991.

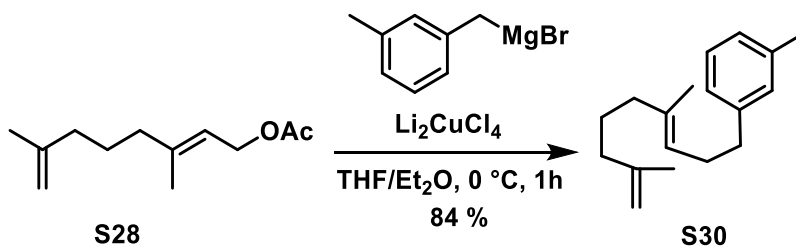

Prepared according to general procedure B, using allylic acetate **S28** (1.18 mmol) and 3-methylbenzyl bromide (2.36 mmol) to give a 89:11 mixture of alkene isomers. Yield: 84% of **S30** (241 mg, 0.99 mmol, colorless oil);  $R_f=0.73$  (hexanes);  $^1\text{H NMR}$  (600 MHz,  $\text{CDCl}_3$ )  $\delta$  7.17 (t,  $J = 7.4$  Hz, 1H), 7.02 – 6.98 (m, 3H), 5.19 (t,  $J = 6.5$  Hz, 1H), 4.70 (s, 1H), 4.66 (s, 1H), 2.60 (t,  $J = 7.8$  Hz, 2H), 2.33 (s, 3H), 2.31 – 2.26 (m, 2H), 2.01 – 1.91 (m, 4H), 1.71 (s, 3H), 1.56 (s, 3H), 1.54 – 1.48 (m, 2H);  $^{13}\text{C NMR}$  (151 MHz,  $\text{CDCl}_3$ )  $\delta$  146.2, 142.5, 137.8, 135.8, 129.4, 128.3, 126.5, 125.6, 124.0, 109.9, 39.4, 37.5, 36.2, 30.1, 26.1, 22.6, 21.6, 16.0; ; **HRMS** (ES+)  $m/z$  calc'd for  $\text{C}_{18}\text{H}_{26}$   $[\text{M}]^+$ : 242.2034, found 242.2045.

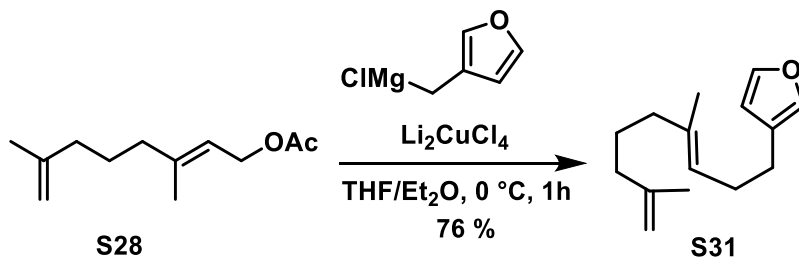

Prepared according to general procedure B, using allylic acetate **S28** (1.00 mmol) and 3-chloromethylfuran (2.00 mmol) to give a 89:11 mixture of alkene isomers. Yield: 76% of **S31** (165 mg, 0.76 mmol, colorless oil);  $R_f=0.40$  (hexanes);  $^1\text{H NMR}$  (500 MHz,  $\text{CDCl}_3$ )  $\delta$  7.34 (t,  $J = 1.6$  Hz, 1H), 7.21 (d,  $J = 0.9$  Hz, 1H), 6.28 (s, 1H), 5.19 – 5.15 (m, 1H), 4.70 (d,  $J = 0.7$  Hz, 1H), 4.66 (d,  $J = 0.8$  Hz, 1H), 2.45 (t,  $J = 7.6$  Hz, 2H), 2.25 (q,  $J = 7.4$  Hz, 2H), 2.01 – 1.94 (m, 4H), 1.71 (s, 3H), 1.59 (s, 3H), 1.56 – 1.48 (m, 2H);  $^{13}\text{C NMR}$  (126 MHz,  $\text{CDCl}_3$ )  $\delta$  146.2, 142.7, 139.0, 135.9, 125.1, 124.0, 111.2, 109.9, 39.4, 37.5, 28.6, 26.0, 25.2, 22.6, 16.1; **HRMS** (ES+)  $m/z$  calc'd for  $\text{C}_{15}\text{H}_{22}\text{OH}$   $[\text{M} + \text{H}]^+$ : 219.1749, found 219.1656.

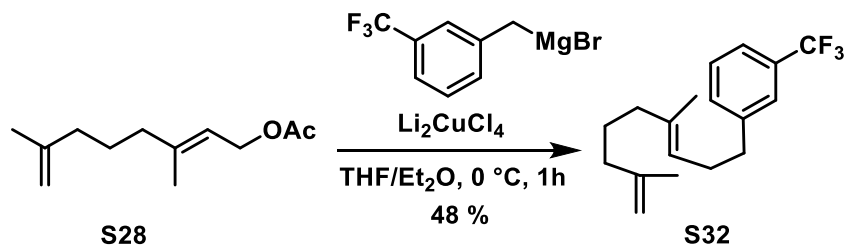

Prepared according to general procedure B, using allylic acetate **S28** (1.18 mmol) and 3-(trifluoromethyl)benzyl bromide (2.95 mmol) to give a 89:11 mixture of alkene isomers. Yield: 48% of **S32** (168 mg, 0.57 mmol, colorless oil);  $R_f=0.65$  (hexanes);  $^1\text{H NMR}$  (600 MHz,  $\text{CDCl}_3$ )  $\delta$  7.45 – 7.43 (m, 2H), 7.40 – 7.35 (m, 2H), 5.15 (td,  $J = 7.1, 1.1$  Hz, 1H), 4.70 (s, 1H), 4.66 (s, 1H), 2.71 (t,  $J = 7.6$  Hz, 2H), 2.33 (q,  $J = 7.4$  Hz, 2H), 2.00 – 1.91 (m, 4H), 1.71 (s, 3H), 1.52 (s, 3H), 1.53 – 1.49 (m, 2H);  $^{13}\text{C NMR}$  (151 MHz,  $\text{CDCl}_3$ )  $\delta$  146.1, 143.2, 136.5, 132.0, 130.5 (q,  $J = 31.9$  Hz), 128.6, 125.3 (q,  $J = 3.7$  Hz), 124.4 (q,  $J = 271.8$  Hz), 123.0, 122.6 (q,  $J = 3.8$  Hz), 109.8, 39.3, 37.4, 35.9, 29.6, 25.9, 22.4, 15.9; **HRMS** (ES+)  $m/z$  calc'd for  $\text{C}_{18}\text{H}_{23}\text{F}_3\text{NH}_4$   $[\text{M} + \text{NH}_4]^+$ : 314.2096, found 314.2093.

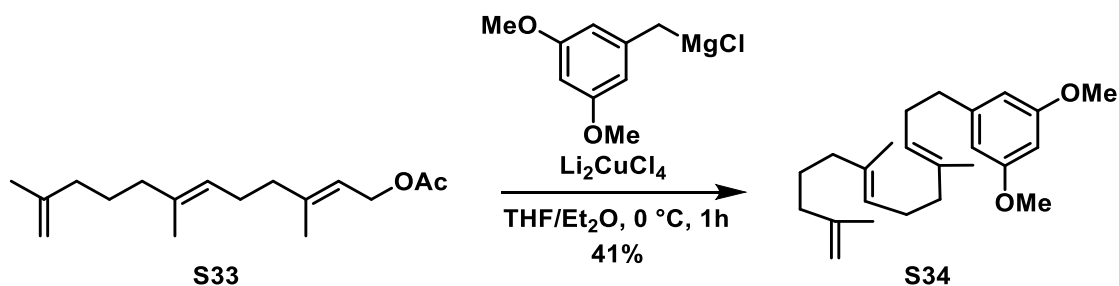

Prepared according to *general procedure B*, using allylic acetate **S33**<sup>[22]</sup> (0.340 mmol, 1.0 equiv.) and 3,5-dimethoxybenzyl chloride (0.680 mmol, 2.0 equiv) to give a 89:11 mixture of alkene isomers. Yield: 41% of **S34** (55 mg, 0.15 mmol, colorless oil);  $R_f=0.21$  (2:98 Et<sub>2</sub>O/hexanes); <sup>1</sup>H NMR (500 MHz, CDCl<sub>3</sub>)  $\delta$  6.37 (d,  $J = 2.0$  Hz, 2H), 6.32 (d,  $J = 1.9$  Hz, 1H), 5.20 (t,  $J = 7.0$  Hz, 1H), 5.12 (t,  $J = 6.7$  Hz, 1H), 4.71 (s, 1H), 4.68 (s, 1H), 3.79 (s, 6H), 2.62 – 2.56 (m, 2H), 2.33 – 2.30 (m, 2H), 2.13 – 2.04 (m, 4H), 2.03 – 1.95 (m, 4H), 1.73 (s, 3H), 1.60 (s, 3H), 1.60 (s, 3H), 1.53 (dt,  $J = 15.2, 7.7$  Hz, 2H); <sup>13</sup>C NMR (126 MHz, CDCl<sub>3</sub>)  $\delta$  160.8, 146.2, 145.0, 135.9, 135.1, 124.5, 123.7, 109.9, 106.7, 97.8, 55.4, 39.9, 39.4, 37.5, 36.6, 29.9, 26.9, 26.8, 26.1, 22.6, 16.2, 16.0; HRMS (ES+)  $m/z$  calc'd for C<sub>24</sub>H<sub>37</sub>O<sub>2</sub> [M + H]<sup>+</sup>: 357.2794, found 357.2787.

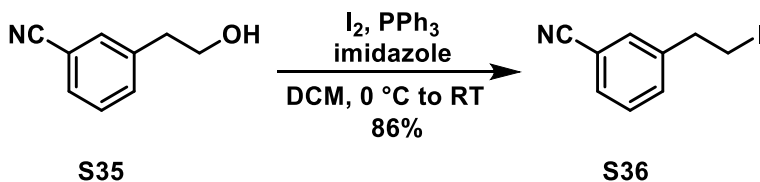

To an ice-cold solution of triphenylphosphine (5.88 g, 22.4 mmol, 1.5 equiv.) in CH<sub>2</sub>Cl<sub>2</sub> (35 mL) was added iodine (5.69 g, 22.4 mmol, 1.5 equiv.). After 10 min., imidazole (2.54 g, 37.4 mmol, 2.5 equiv.) was added and the mixture was stirred for 10 min. A solution of alcohol **S35** (2.20 g, 15.0 mmol, 1.0 equiv.) in CH<sub>2</sub>Cl<sub>2</sub> (15 mL) was added dropwise over approximately 5 min. After 90 min., satd. Na<sub>2</sub>SO<sub>3(aq)</sub> (40 mL) was added in one portion and the aqueous phase was extracted with CH<sub>2</sub>Cl<sub>2</sub> (2 x 20 mL). The combined organic extracts were washed with brine (20 mL), dried over Na<sub>2</sub>SO<sub>4</sub>, filtered and concentrated *in vacuo*. The crude residue was purified via flash column chromatography (EtOAc/hexanes 5:95) to give

iodide **S36** as a crystalline white solid (3.32 g, 12.9 mmol, 86% yield).  $^1\text{H NMR}$  (500 MHz,  $\text{CDCl}_3$ )  $\delta$  7.58 – 7.55 (m, 1H), 7.50 (s, 1H), 7.46 – 7.43 (m, 2H), 3.35 (t,  $J = 7.4$  Hz, 2H), 3.21 (t,  $J = 7.4$  Hz, 2H);  $^{13}\text{C NMR}$  (126 MHz,  $\text{CDCl}_3$ )  $\delta$  141.8, 133.1, 132.1, 130.8, 129.6, 118.8, 112.9, 39.4, 4.4. **HRMS** (ES+)  $m/z$  calc'd for  $\text{C}_9\text{H}_8\text{IN}$   $[\text{M}]^+$ : 256.9702, found 256.9713.

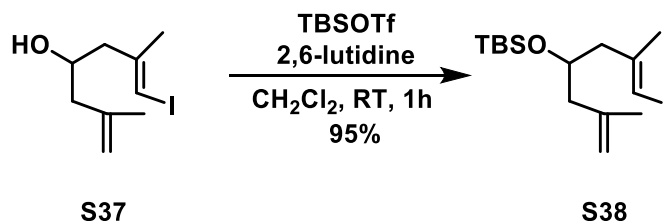

To a solution of alcohol **S37**<sup>[23]</sup> (100 mg, 0.376 mmol, 1.0 equiv.) and 2,6-lutidine (200  $\mu\text{L}$ , 1.73 mmol, 4.6 equiv.) in  $\text{CH}_2\text{Cl}_2$  (1 mL) was added TBSOTf (130  $\mu\text{L}$ , 0.564 mmol, 1.5 equiv.). The mixture was stirred for 1 h at ambient temperature, then methanol (5.0 mL) was added. Volatiles were removed *in vacuo*, and the resulting crude residue was directly purified via flash chromatography using a mixture of EtOAc/hexanes (1:99) as eluent to give silyl ether **S38** as a colorless oil (3.52 g, 95%).  $^1\text{H NMR}$  (500 MHz,  $\text{CDCl}_3$ )  $\delta$  5.90 (d,  $J = 0.8$  Hz, 1H), 4.79 (s, 1H), 4.70 (s, 1H), 3.90 (tdd,  $J = 7.4, 5.6, 4.5$  Hz, 1H), 2.35 (dd,  $J = 13.5, 4.0$  Hz, 1H), 2.27 (dd,  $J = 13.5, 7.6$  Hz, 1H), 2.19 (dd,  $J = 13.6, 5.5$  Hz, 1H), 2.12 (dd,  $J = 13.6, 7.2$  Hz, 1H), 1.83 (d,  $J = 0.9$  Hz, 3H), 1.73 (s, 3H), 0.87 (s, 9H), 0.03 (s, 3H), 0.01 (s, 3H);  $^{13}\text{C NMR}$  (126 MHz,  $\text{CDCl}_3$ )  $\delta$  145.1, 142.5, 113.5, 77.6, 69.0, 47.0, 46.4, 26.0, 24.6, 23.2, 18.2,  $-4.4(2\text{C})$ ; **HRMS** (ES+)  $m/z$  calc'd for  $\text{C}_{15}\text{H}_{29}\text{IOSiH}$   $[\text{M} + \text{H}]^+$ : 381.1111, found 381.1109.

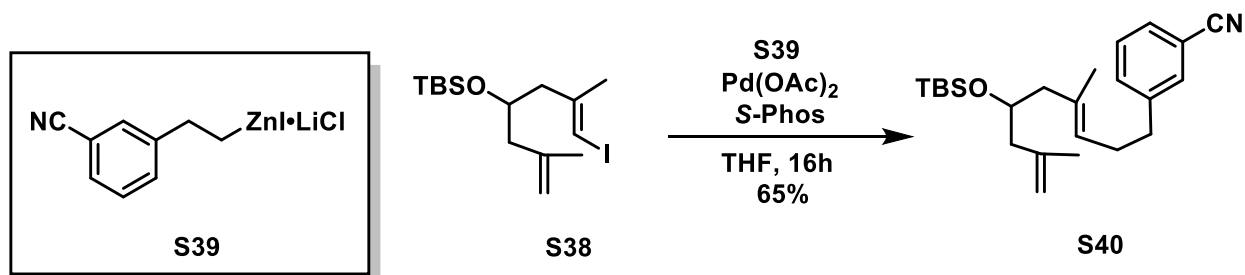

*Preparation of the homobenzylic zinc reagent S39:* LiCl (53 mg, 1.25 mmol, 1.9 equiv.) was dried under high-vacuum for 2 h at 170  $^\circ\text{C}$ , then  $\text{Zn}^0$  dust (82 mg, 1.25 mmol, 1.9 equiv.) was added and the mixture

was dried for another 2 h. The flask was cooled to ambient temperature, the contents were suspended in THF (0.5 mL). The zinc dust was activated by adding 5 drops of a saturated I<sub>2</sub> solution in THF and sonicating the suspension until the brown color faded. A THF (4 mL) solution of homobenzylic iodide **S36** (169 mg, 0.66 mmol, 1.25 equiv.) was added and the mixture was stirred at 50 °C for 4 h.

*Negishi Cross-Coupling:* To a solution of Pd(OAc)<sub>2</sub> (15 mg, 65.8 μmol, 0.1 equiv.) and S-Phos (59 mg, 0.132 mmol, 0.2 equiv.) in THF (1 mL) was added a solution of vinyl iodide **S38** (200 mg, 0.526 mmol, 1.0 equiv.) in THF (0.5 mL). The aforementioned solution of homobenzylic zinc reagent **S39** was quickly added and the resulting suspension was stirred at room temperature for 16 h. Then, satd. NH<sub>4</sub>Cl<sub>(aq)</sub> (10 mL) was added and the reaction mixture was extracted with Et<sub>2</sub>O (3 x 20 mL). The combined organic extracts were washed with brine, dried over Na<sub>2</sub>SO<sub>4</sub>, filtered and concentrated *in vacuo*. The resulting crude residue was purified via flash column chromatography using a mixture of Et<sub>2</sub>O/ hexanes (2:98) as eluent to give **S40** as a colorless oil (131 mg, 0.341 mmol, 65% yield); <sup>1</sup>H NMR (600 MHz, CDCl<sub>3</sub>) δ 7.51 – 7.45 (m, 2H), 7.41 (d, *J* = 7.8 Hz, 1H), 7.37 (t, *J* = 7.9 Hz, 1H), 5.15 (t, *J* = 6.6 Hz, 1H), 4.76 (d, *J* = 1.4 Hz, 1H), 4.67 (s, 1H), 3.86 (p, *J* = 6.3 Hz, 1H), 2.73 – 2.62 (m, 2H), 2.36 – 2.25 (m, 2H), 2.13 – 2.03 (m, 4H), 1.71 (s, 3H), 1.55 (s, 3H), 0.86 (s, 9H), 0.01 (s, 3H), -0.00 (s, 3H); <sup>13</sup>C NMR (151 MHz, CDCl<sub>3</sub>) δ 143.7, 143.0, 133.9, 133.3, 132.1, 129.7, 129.1, 125.8, 119.3, 113.2, 112.3, 69.5, 47.7, 46.0, 35.6, 29.7, 26.0, 23.1, 18.2, 16.7, -4.4, -4.5; HRMS (ES+) *m/z* calc'd for C<sub>24</sub>H<sub>37</sub>NOSiNa [M + Na]<sup>+</sup>: 406.2542, found 406.2540.

General Procedure C (B-alkyl Suzuki coupling):

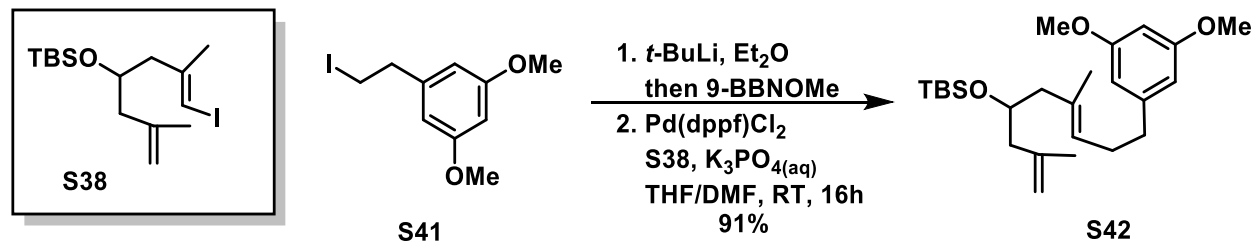

To a solution of homobenzylic iodide **S41**<sup>[24]</sup> (200 mg, 0.684 mmol, 1.3 equiv.) in Et<sub>2</sub>O (2 mL) was added a 1.7 M solution of *tert*-butyllithium (1.24 mL, 2.1 mmol, 4.0 equiv.) in pentane at -78 °C. The resulting mixture was stirred for 10 minutes and a 1.0 M solution of 9-BBN-OMe (2.4 mL, 4.5 equiv.) was added dropwise and the reaction flask was allowed to warm to ambient temperature over 30 min. THF (2 mL) followed by 3.0 M K<sub>3</sub>PO<sub>4(aq)</sub> (0.44 mL, 1.3 mmol, 2.5 equiv.) were added, then the mixture was stirred for 1 h at room temperature. A solution of vinyl iodide **S38** (200 mg, 0.526 mmol, 1.0 equiv.) in DMF (2.0 mL), followed by Pd(dppf)Cl<sub>2</sub> (43 mg, 0.053 mmol, 0.1 equiv.) were finally added and the resulting suspension was stirred overnight under Ar. Next, the mixture was diluted with Et<sub>2</sub>O (30 mL) and the organic phases were washed with DI H<sub>2</sub>O (3 x 10 mL). The combined organic extracts were washed with brine (10 mL), dried over Na<sub>2</sub>SO<sub>4</sub>, filtered and concentrated *in vacuo*. The crude residue was purified via flash column chromatography (Et<sub>2</sub>O/ hexanes 4:96) to give **S42** as a colorless oil (200 mg, 0.479 mmol, 91 % yield); <sup>1</sup>H NMR (500 MHz, CDCl<sub>3</sub>) δ 6.35 (d, *J* = 2.2 Hz, 2H), 6.30 (t, *J* = 2.1 Hz, 1H), 5.20 (t, *J* = 6.9 Hz, 1H), 4.76 (s, 1H), 4.68 (s, 1H), 3.91 – 3.85 (m, 1H), 3.78 (s, 6H), 2.62 – 2.55 (m, 2H), 2.34 – 2.24 (m, 2H), 2.12 – 2.06 (m, 4H), 1.71 (s, 3H), 1.60 (s, 3H), 0.87 (s, 9H), 0.02 (s, 3H), 0.01 (s, 3H); <sup>13</sup>C NMR (151 MHz, CDCl<sub>3</sub>) δ 160.7, 144.8, 143.1, 132.9, 126.7, 112.9, 106.5, 97.7, 69.7, 55.3, 47.8, 45.9, 36.3, 29.9, 29.3, 25.9, 23.05, 18.17, 16.69, -4.49; HRMS (ES<sup>+</sup>) *m/z* calc'd for C<sub>25</sub>H<sub>42</sub>O<sub>3</sub>SiNa [M + Na]<sup>+</sup>: 441.2801, found 441.2818.

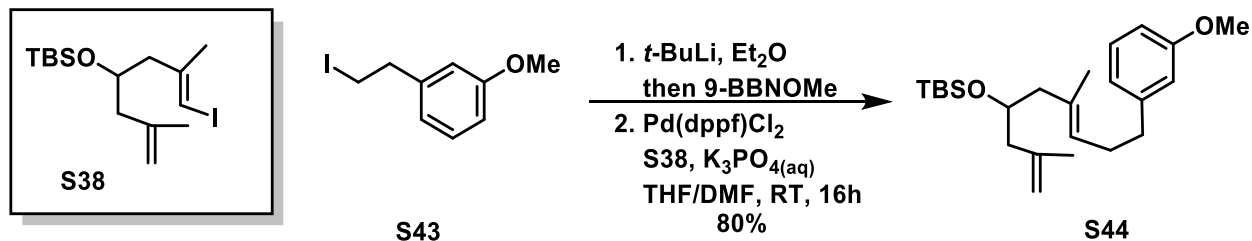

Prepared according to *general procedure C*, using vinyl iodide **S38** (0.71 mmol) and homobenzylic iodide **S43**<sup>[25]</sup> (0.92 mmol). Yield: 80% of **S44** (220 mg, 0.57 mmol, colorless oil);  $R_f=0.38$  (3:97 Et<sub>2</sub>O/hexanes); <sup>1</sup>H NMR (600 MHz, CDCl<sub>3</sub>)  $\delta$  7.19 (t,  $J = 7.8$  Hz, 1H), 6.79 (d,  $J = 7.4$  Hz, 1H), 6.76 – 6.71 (m, 2H), 5.22 (t,  $J = 6.8$  Hz, 1H), 4.77 (s, 1H), 4.69 (s, 1H), 3.88 (p,  $J = 6.2$  Hz, 1H), 3.80 (s, 3H), 2.68 – 2.58 (m, 2H), 2.31 (dt,  $J = 14.7, 7.2$  Hz, 2H), 2.16 – 2.06 (m, 4H), 1.72 (s, 3H), 1.59 (s, 3H), 0.87 (s, 9H), 0.03 (s, 3H), 0.02 (s, 3H); <sup>13</sup>C NMR (151 MHz, CDCl<sub>3</sub>)  $\delta$  159.7, 144.2, 143.2, 133.0, 129.3, 126.9, 121.0, 114.4, 113.0, 111.1, 69.8, 55.3, 47.9, 46.0, 36.1, 30.1, 26.0(3C), 23.2, 18.3, 16.8, –4.4(2C); HRMS (ES<sup>+</sup>)  $m/z$  calc'd for C<sub>24</sub>H<sub>40</sub>O<sub>2</sub>SiNa [M + Na]<sup>+</sup>: 411.2695, found 411.2702.

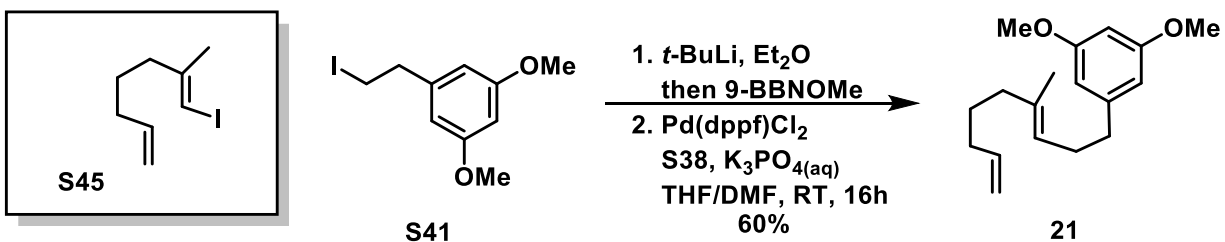

Prepared according to *general procedure C*, using vinyl iodide **S45**<sup>[26]</sup> (0.53 mmol) and homobenzylic iodide **S41**<sup>[21]</sup> (0.68 mmol). Yield: 60% of **21** (86 mg, 0.31 mmol, colorless oil);  $R_f=0.28$  (2:98 Et<sub>2</sub>O/hexanes); <sup>1</sup>H NMR (600 MHz, CDCl<sub>3</sub>)  $\delta$  6.36 (d,  $J = 2.0$  Hz, 2H), 6.31 (d,  $J = 2.0$  Hz, 1H), 5.81 (ddt,  $J = 16.9, 10.2, 6.6$  Hz, 1H), 5.18 (t,  $J = 7.0$  Hz, 1H), 5.00 (d,  $J = 17.1$  Hz, 1H), 4.94 (d,  $J = 10.2$  Hz, 1H), 3.78 (s, 6H), 2.63 – 2.55 (m, 2H), 2.30 (dd,  $J = 15.3, 7.5$  Hz, 2H), 2.03 – 1.96 (m, 4H), 1.57 (s, 3H), 1.52 – 1.44 (m, 2H); <sup>13</sup>C DEPTQ NMR (151 MHz, CDCl<sub>3</sub>)  $\delta$  160.8, 145.0, 139.1, 135.8, 123.9, 114.5 (2C), 106.7 (2C), 97.8, 55.4 (2C), 39.2, 36.6, 33.5, 29.8, 27.3, 16.0; HRMS (ES<sup>+</sup>)  $m/z$  calc'd for C<sub>18</sub>H<sub>27</sub>O<sub>2</sub> [M + H]<sup>+</sup>: 275.2011, found 275.2010.



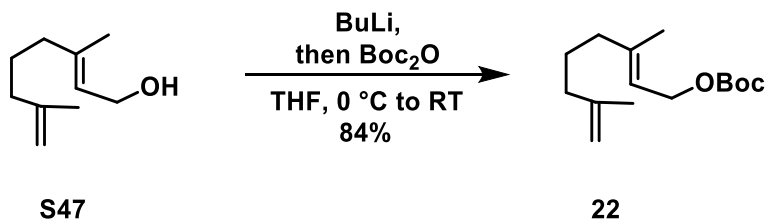

To an ice-cold solution of alcohol **S47**<sup>[27]</sup> (700 mg, 4.54 mmol, 1.0 equiv.) in THF (12 mL) was added a 2.4M solution of *n*-butyllithium (1.9 mL, 4.54 mmol, 1.0 equiv.) in hexanes. The resulting solution was stirred for 15 minutes, and a solution of Boc<sub>2</sub>O (990 mg, 4.54 mmol, 1.0 equiv.) in THF (6 mL) added dropwise. After stirring for 1 hour, satd. NH<sub>4</sub>Cl<sub>(aq)</sub> (10 mL) was added. The aqueous phase was extracted with EtOAc (3 x 10 mL), the combined organic extracts were washed with brine (10 mL), dried over Na<sub>2</sub>SO<sub>4</sub>, filtered and concentrated *in vacuo*. The resulting crude residue was purified via flash column chromatography, using a mixture of EtOAc/ hexanes (5:95) as eluent to give carbonate **22** as a colorless oil (969 mg, 3.81 mmol, 84% yield). <sup>1</sup>H NMR (500 MHz, CDCl<sub>3</sub>) δ 5.37 (t, *J* = 7.1 Hz, 1H), 4.70 (s, 1H), 4.66 (s, 1H), 4.58 (d, *J* = 7.2 Hz, 2H), 2.04 – 2.00 (m, 2H), 2.00 – 1.95 (m, 2H), 1.70 (s, 6H), 1.57 – 1.52 (m, 2H), 1.48 (s, 9H); <sup>13</sup>C NMR (126 MHz, CDCl<sub>3</sub>) δ 153.8, 145.8, 142.7, 118.3, 110.1, 82.0, 63.9, 39.2, 37.4, 28.0, 25.6, 22.5, 16.5; ; HRMS (ES+) *m/z* calc'd for C<sub>15</sub>H<sub>26</sub>O<sub>3</sub>Na [M + Na]<sup>+</sup>: 277.1780, found 277.1782.

#### D. Cobalt Catalyzed Bicyclizations and Product Characterization

General Procedure D (Cobalt catalyzed bicyclization):

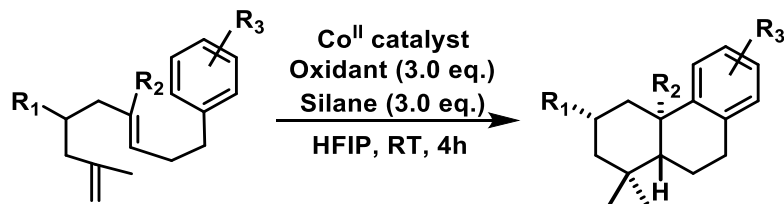

A dry round-bottom flask was charged with a magnetic stirring bar, bicyclization substrate (0.20 mmol, 1.0 equiv.) cobalt catalyst (0.02 mmol, 0.1 equiv.) and 1-fluoro-2,4,6-trimethylpyridinium triflate (0.60 mmol, 3.0 equiv.). The reagents were dissolved in HFIP (1.0 mL, 0.2 M based on substrate), and the flask was capped with a rubber septum. A balloon equipped with a syringe needle was used to bubble Ar through the solution for 10 minutes (a syringe needle was used as an outlet). Then, the flask was sealed from the atmosphere and TMSO (0.60 mmol, 3 equiv.) was added dropwise at a rate of 1 drop per 3 seconds. The resulting solution gradually turned dark red or tan from its initial, dark green color. After 4-9 hours, TLC indicated complete starting material consumption and the volatiles were removed *in vacuo*. The resulting residue was directly purified via flash column chromatography. *Note: if  $^1\text{H}$  NMR spectrum of the crude reaction mixture is desired, the crude residue should be passed through a short silica plug (using EtOAc as eluent) to remove paramagnetic cobalt complexes.*

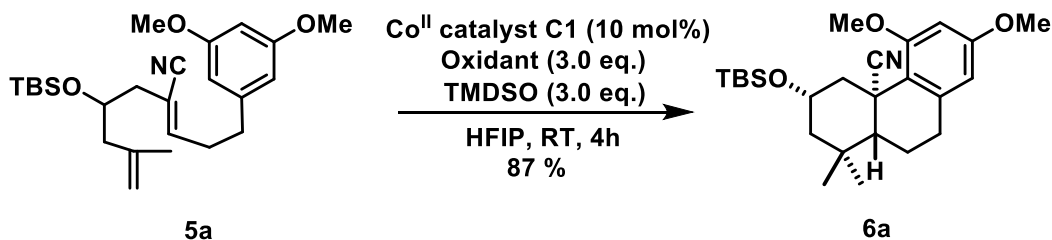

Prepared according to general procedure D, using  $\alpha,\beta$ -unsaturated nitrile **5a** (0.12 mmol), cobalt catalyst **C1** (0.012 mmol), 1-fluoro-2,4,6-trimethylpyridinium triflate (0.36 mmol), and 1,1,3,3-tetramethyldisiloxane (0.36 mmol). Yield: 87% of **6a** (44 mg, 0.10 mmol, white crystalline solid);

$R_f=0.15$  (5:95 Et<sub>2</sub>O/hexanes); <sup>1</sup>H NMR (500 MHz, CDCl<sub>3</sub>) δ 6.32 (d,  $J = 2.1$  Hz, 1H), 6.23 (d,  $J = 1.8$  Hz, 1H), 4.22 (tt,  $J = 11.3, 4.0$  Hz, 1H), 3.85 (s, 3H), 3.77 (s, 3H), 3.68 (d,  $J = 12.6$  Hz, 1H), 2.90 – 2.82 (m, 2H), 1.98 (d,  $J = 13.2$  Hz, 1H), 1.80 (d,  $J = 11.3$  Hz, 1H), 1.70 – 1.59 (m, 2H), 1.34 – 1.28 (m, 2H), 1.20 (s, 3H), 1.20 – 1.14 (m, 4H), 0.94 (s, 10H), 0.15 (s, 6H); <sup>13</sup>C NMR (151 MHz, CDCl<sub>3</sub>) δ 160.0, 159.9, 139.8, 122.8, 118.6, 105.4, 97.8, 66.2, 55.6, 55.4, 52.5, 50.5, 43.3, 39.4, 34.9, 33.0, 32.8, 26.1, 21.6, 21.0, 18.5, –4.5; HRMS (ES+)  $m/z$  calc'd for C<sub>25</sub>H<sub>39</sub>NO<sub>3</sub>SiNa [M + Na]<sup>+</sup>: 452.2597, found 452.2600.

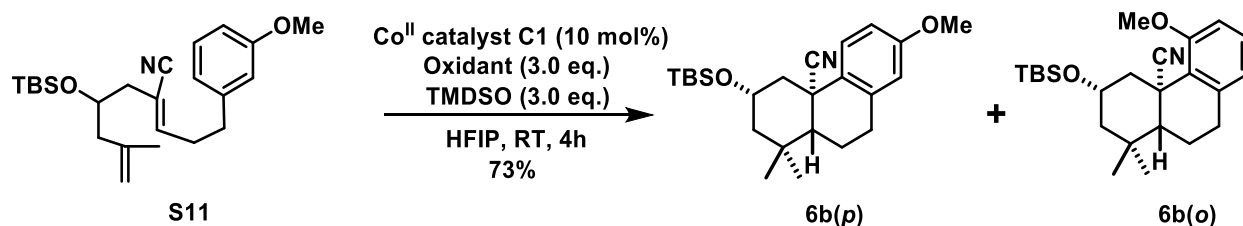

Prepared according to general procedure D, using  $\alpha,\beta$ -unsaturated nitrile **S11** (0.38 mmol), cobalt catalyst **C1** (0.038 mmol), 1-fluoro-2,4,6-trimethylpyridinium triflate (1.13 mmol), and 1,1,3,3-tetramethyldisiloxane (1.13 mmol). Combined yield: 73%; *p*-regioisomer **6b(p)**: Yield: 46% (69 mg, 0.17 mmol, white solid);  $R_f=0.15$  (2:2:96 benzene/EtOAc/hexanes); <sup>1</sup>H NMR (600 MHz, CDCl<sub>3</sub>) δ 7.33 (d,  $J = 8.8$  Hz, 1H), 6.77 (dd,  $J = 8.8, 2.7$  Hz, 1H), 6.64 (d,  $J = 2.6$  Hz, 1H), 4.24 (tt,  $J = 11.3, 4.0$  Hz, 1H), 3.78 (s, 3H), 3.01 (dd,  $J = 17.3, 5.2$  Hz, 1H), 2.92 – 2.82 (m, 2H), 2.05 (dd,  $J = 13.1, 7.3$  Hz, 1H), 1.90 – 1.86 (m, 1H), 1.79 (ddd,  $J = 12.9, 3.9, 2.1$  Hz, 1H), 1.51 – 1.45 (m, 1H), 1.32 – 1.25 (m, 2H), 1.17 (s, 3H), 1.03 (s, 3H), 0.93 (s, 9H), 0.16 (s, 3H), 0.15 (s, 3H); <sup>13</sup>C NMR (151 MHz, CDCl<sub>3</sub>) δ 159.2, 137.6, 129.8, 126.7, 123.5, 114.2, 113.0, 65.9, 55.4, 50.5, 50.0, 45.2, 39.8, 35.0, 32.2, 30.4, 26.1, 21.3, 21.1, 18.3, –4.4(2C); ; HRMS (ES+)  $m/z$  calc'd for C<sub>24</sub>H<sub>37</sub>NO<sub>2</sub>SiNa [M + Na]<sup>+</sup>: 422.2491, found 422.2490.

*o*-regioisomer **6b(o)**: Yield: 27% (41 mg, 0.10 mmol, white solid);  $R_f=0.20$  (2:2:96 benzene/EtOAc/hexanes); <sup>1</sup>H NMR (600 MHz, CDCl<sub>3</sub>) δ 7.17 (t,  $J = 7.9$  Hz, 1H), 6.76 – 6.70 (m, 2H), 4.24 (ddd,  $J = 15.3, 7.7, 4.0$  Hz, 1H), 3.88 (s, 3H), 3.73 (d,  $J = 12.6$  Hz, 1H), 2.94 – 2.83 (m, 2H), 2.03 – 1.97 (m, 1H), 1.82 (ddd,  $J = 12.8, 3.9, 2.1$  Hz, 1H), 1.70 – 1.63 (m, 1H), 1.38 – 1.29 (m, 2H), 1.21 (s,

3H), 1.20 – 1.16 (m, 1H), 1.05 (s, 3H), 0.94 (s, 9H), 0.15 (s, 6H);  $^{13}\text{C}$  NMR (151 MHz,  $\text{CDCl}_3$ )  $\delta$  158.9, 139.0, 128.8, 125.7, 122.6, 122.4, 109.5, 66.3, 55.6, 52.5, 50.6, 43.0, 39.7, 35.0, 33.0, 32.4, 26.1, 21.6, 20.9, 18.5, -4.48, -4.50; HRMS (ES+)  $m/z$  calc'd for  $\text{C}_{24}\text{H}_{37}\text{NO}_2\text{SiNa}$   $[\text{M} + \text{Na}]^+$ : 422.2491, found 422.2489.

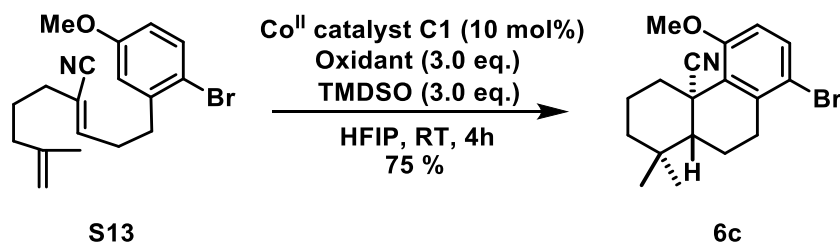

Prepared according to *general procedure D*, using  $\alpha,\beta$ -unsaturated nitrile **S13** (0.11 mmol), cobalt catalyst **C1** (0.011 mmol), 1-fluoro-2,4,6-trimethylpyridinium triflate (0.33 mmol), and 1,1,3,3-tetramethyldisiloxane (0.33 mmol). Yield: 75% (30 mg, 0.57 mmol, white solid);  $R_f$ =0.15 (3:97 EtOAc/hexanes);  $^1\text{H}$  NMR (600 MHz,  $\text{CDCl}_3$ )  $\delta$  7.44 (d,  $J = 8.8$  Hz, 1H), 6.67 (d,  $J = 8.8$  Hz, 1H), 3.87 (s, 3H), 3.48 (d,  $J = 13.1$  Hz, 1H), 2.93 (dd,  $J = 17.7, 3.6$  Hz, 1H), 2.74 – 2.56 (m, 1H), 2.08 (dd,  $J = 13.4, 6.1$  Hz, 1H), 1.99 (qt,  $J = 13.7, 3.3$  Hz, 1H), 1.71 – 1.58 (m, 3H), 1.31 (d,  $J = 11.8$  Hz, 1H), 1.26 (td,  $J = 13.4, 3.8$  Hz, 1H), 1.18 (s, 3H), 1.13 (td,  $J = 13.3, 3.3$  Hz, 1H), 1.02 (s, 3H);  $^{13}\text{C}$  NMR (151 MHz,  $\text{CDCl}_3$ )  $\delta$  158.4, 138.3, 132.5, 129.1, 122.6, 117.0, 111.2, 55.9, 52.3, 40.9, 40.2, 35.0, 34.2, 34.2, 32.7, 21.2, 20.6, 20.5; HRMS (ES+)  $m/z$  calc'd for  $\text{C}_{18}\text{H}_{22}\text{BrNONa}$   $[\text{M} + \text{Na}]^+$ : 370.0782, found 370.0783.

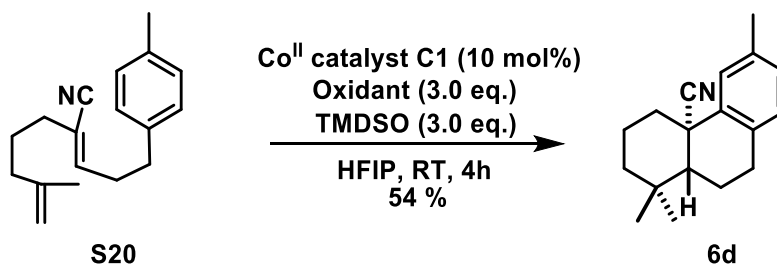

Prepared according to *general procedure D*, using  $\alpha,\beta$ -unsaturated nitrile **S20** (0.20 mmol), cobalt catalyst **C1** (0.020 mmol), 1-fluoro-2,4,6-trimethylpyridinium triflate (0.59 mmol), and 1,1,3,3-tetramethyldisiloxane (0.59 mmol). Yield: 54% of **6d** (27 mg, 0.57 mmol, white solid);  $R_f=0.15$  (2:98 Et<sub>2</sub>O/hexanes); <sup>1</sup>H NMR (600 MHz, CDCl<sub>3</sub>)  $\delta$  7.23 (s, 1H), 7.05 – 7.01 (m, 2H), 2.98 (dd,  $J = 16.9, 5.0$  Hz, 1H), 2.87 – 2.81 (m, 2H), 2.32 (s, 3H), 2.09 – 1.99 (m, 2H), 1.92 – 1.83 (m, 1H), 1.82 – 1.77 (m, 1H), 1.60 (ddd,  $J = 13.5, 4.6, 3.2$  Hz, 1H), 1.49 (td,  $J = 13.4, 3.5$  Hz, 1H), 1.35 (dd,  $J = 12.1, 1.9$  Hz, 1H), 1.26 (td,  $J = 13.7, 3.8$  Hz, 1H), 1.16 (s, 3H), 1.01 (s, 3H); <sup>13</sup>C NMR (151 MHz, CDCl<sub>3</sub>)  $\delta$  137.9, 136.1, 133.1, 129.8, 128.8, 126.2, 123.9, 50.6, 40.8, 40.1, 36.8, 33.8, 32.1, 30.0, 21.7, 21.3, 20.11, 20.08; HRMS (ES<sup>+</sup>)  $m/z$  calc'd for C<sub>18</sub>H<sub>23</sub>NNa [M + Na]<sup>+</sup>: 276.1728, found 276.1739.

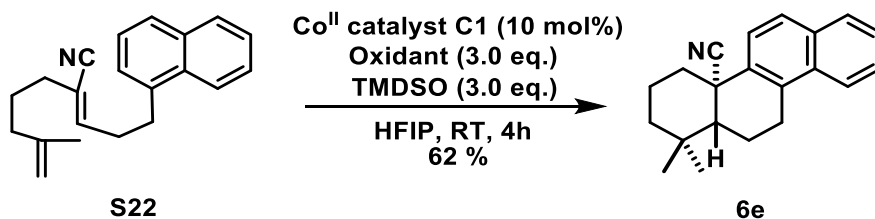

Prepared according to *general procedure D*, using  $\alpha,\beta$ -unsaturated nitrile **S22** (0.17 mmol), cobalt catalyst **C1** (0.017 mmol), 1-fluoro-2,4,6-trimethylpyridinium triflate (0.52 mmol), and 1,1,3,3-tetramethyldisiloxane (0.52 mmol). Yield: 62% of **6e** (31 mg, 0.11 mmol, white crystalline solid);  $R_f=0.15$  (2:98 Et<sub>2</sub>O/hexanes); <sup>1</sup>H NMR (600 MHz, CDCl<sub>3</sub>)  $\delta$  8.00 (d,  $J = 8.3$  Hz, 1H), 7.82 (d,  $J = 7.9$  Hz, 1H), 7.74 (d,  $J = 8.8$  Hz, 1H), 7.57 (d,  $J = 8.8$  Hz, 1H), 7.56 – 7.53 (m, 1H), 7.51 (t,  $J = 7.3$  Hz, 1H), 3.46 (dd,  $J = 17.3, 5.6$  Hz, 1H), 3.22 – 3.13 (m, 1H), 2.93 (d,  $J = 13.0$  Hz, 1H), 2.30 (dd,  $J = 13.5, 6.7$  Hz, 1H), 2.15 – 2.05 (m, 1H), 2.03 – 1.96 (m, 1H), 1.86 – 1.82 (m, 1H), 1.63 (d,  $J = 13.5$  Hz, 1H), 1.53 – 1.46 (m, 2H), 1.33 – 1.25 (m, 1H), 1.22 (s, 3H), 1.07 (s, 3H); <sup>13</sup>C NMR (151 MHz, CDCl<sub>3</sub>)  $\delta$  135.1, 132.7, 132.4, 132.1, 128.5, 127.5, 126.7, 126.3, 123.7, 123.6, 123.2, 50.5, 40.8, 40.7, 37.2, 33.7, 32.1, 27.7, 21.5, 20.3, 20.1; HRMS (ES<sup>+</sup>)  $m/z$  calc'd for C<sub>21</sub>H<sub>23</sub>NNa [M + Na]<sup>+</sup>: 312.1728, found 312.1724.

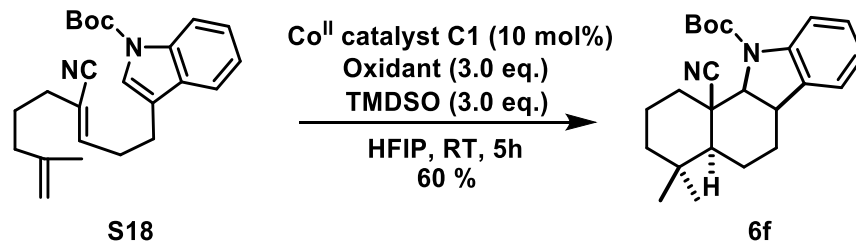

Prepared according to general procedure D, using  $\alpha,\beta$ -unsaturated nitrile **S18** (0.13 mmol), cobalt catalyst **C1** (0.013 mmol), 1-fluoro-2,4,6-trimethylpyridinium triflate (0.40 mmol), and 1,1,3,3-tetramethyldisiloxane (0.40 mmol). Yield: 60% of **6f** (30 mg, 0.08 mmol, white crystalline solid);  $R_f=0.18$  (2.5:97.5 EtOAc/hexanes);  $^1\text{H NMR}$  (600 MHz,  $\text{CDCl}_3$ ) (Note: mixture of rotamers, integrations are relative)  $\delta$  7.48 – 7.30 (m (br), 1H), 7.24 (t (br),  $J = 7.3$  Hz, 1H), 7.16 – 7.11 (m(br), 1H), 7.07 (t,  $J = 7.4$  Hz, 1H), 4.63 – 4.18 (m(br), 2H), 3.63 (t (br),  $J = 7.0$  Hz, 2H), 2.51 (d,  $J = 14.1$  Hz, 1H), 2.45 – 2.29 (m (br), 2H), 1.95 – 1.80 (m, 2H), 1.78 – 1.64 (m(br), 5H), 1.60 (s(br), 3H), 1.57 (s(br), 15H), 1.29 – 1.16 (m(br), 4H), 1.03 – 0.98 (m, 3H), 0.95 (s(br), 6H).  $^{13}\text{C NMR}$  (151 MHz,  $\text{CDCl}_3$ )  $\delta$  171.3, 153.4(br), 143.4(br), 133.9(br), 131.6(br), 128.0(br), 123.8, 123.8, 121.62(br), 118.7(br), 117.7, 82.0(br), 69.1(br), 60.6(br), 49.4(br), 45.5, 44.0(br), 41.0, 40.8, 39.7(br), 38.1, 37.9, 33.4, 32.4, 28.5, 28.5, 24.3, 21.2, 21.1, 20.6, 20.6(br), 20.36, 19.2(br), 19.0(br), 14.34. **HRMS** (ES+)  $m/z$  calc'd for  $\text{C}_{24}\text{H}_{32}\text{N}_2\text{O}_2\text{Na}$  [ $\text{M} + \text{Na}$ ] $^+$ : 403.2361, found 403.2367.

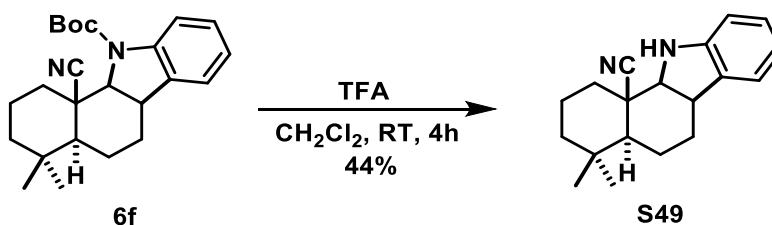

To a solution of indoline **6f** (30 mg, 0.079 mmol) in  $\text{CH}_2\text{Cl}_2$  (1 mL) was added trifluoroacetic acid (100  $\mu\text{L}$ , 1.3 mmol,  $\sim 16$  equiv.). The mixture was stirred for 4 h at ambient temperature, then a satd.  $\text{NaHCO}_3(\text{aq})$  solution (2.0 mL) was added. The resulting biphasic mixture was vigorously stirred for 1h then the aqueous phase was extracted with  $\text{CH}_2\text{Cl}_2$  (3 x 2 mL). The combined organic phases were washed with brine (3 mL), dried over  $\text{Na}_2\text{SO}_4$ , filtered and concentrated *in vacuo*. The resulting crude

residue was directly purified via flash chromatography using a mixture of EtOAc/ hexanes (15:85) as eluent to give N-H indoline **S49** as a crystalline white solid (13 mg, 44%);  $^1\text{H NMR}$  (600 MHz,  $\text{CDCl}_3$ )  $\delta$  7.10 – 7.05 (m, 2H), 6.80 (t,  $J = 7.4$  Hz, 1H), 6.69 (d,  $J = 7.7$  Hz, 1H), 4.34 (s, 1H), 3.47 – 3.44 (m, 2H), 2.49 – 2.42 (m, 1H), 2.27 (d,  $J = 13.0$  Hz, 1H), 1.90 (ddd,  $J = 16.2, 11.3, 5.6$  Hz, 1H), 1.84 – 1.72 (m, 2H), 1.64 – 1.49 (m, 3H), 1.27 (td,  $J = 13.2, 3.5$  Hz, 1H), 1.20 (td,  $J = 13.5, 3.5$  Hz, 1H), 1.00 (s, 3H), 1.00 – 0.97 (m, 1H), 0.95 (s, 3H);  $^{13}\text{C NMR}$  (151 MHz,  $\text{CDCl}_3$ )  $\delta$  150.7, 130.0, 128.0, 122.4, 122.3, 119.4, 109.6, 69.3, 48.2, 42.7, 41.2, 40.6, 38.0, 33.4, 32.2, 24.7, 20.7, 20.6, 19.0. **HRMS** (ES<sup>+</sup>)  $m/z$  calc'd for  $\text{C}_{19}\text{H}_{24}\text{N}_2\text{Na}$  [ $\text{M} + \text{Na}$ ]<sup>+</sup>: 303.1936, found 303.1939.

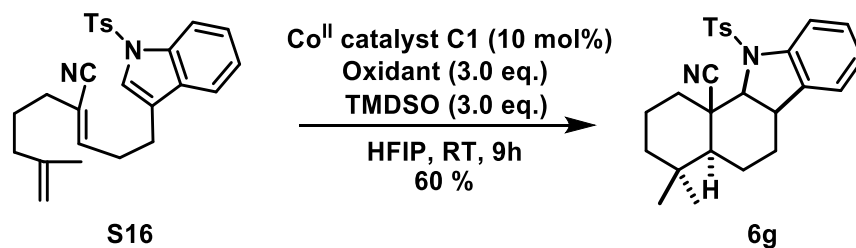

Prepared according to general procedure D, using  $\alpha,\beta$ -unsaturated nitrile **S16** (0.23 mmol), cobalt catalyst **C1** (0.023 mmol), 1-fluoro-2,4,6-trimethylpyridinium triflate (0.69 mmol), and 1,1,3,3-tetramethyldisiloxane (0.69 mmol). Yield: 60% of **6g** (60 mg, 0.14 mmol, white crystalline solid);  $R_f=0.15$  (1:9 EtOAc/hexanes);  $^1\text{H NMR}$  (600 MHz,  $\text{CDCl}_3$ )  $\delta$  7.68 (d,  $J = 8.0$  Hz, 1H), 7.48 (d,  $J = 7.7$  Hz, 2H), 7.30 (t,  $J = 7.7$  Hz, 1H), 7.16 (t,  $J = 7.5$  Hz, 1H), 7.13 (d,  $J = 7.9$  Hz, 2H), 6.97 (d,  $J = 7.4$  Hz, 1H), 3.99 (d,  $J = 7.5$  Hz, 1H), 2.78 (d,  $J = 13.8$  Hz, 1H), 2.71 (t,  $J = 6.8$  Hz, 1H), 2.35 (s, 3H), 2.26 (d,  $J = 15.1$  Hz, 1H), 1.75 (q,  $J = 13.6$  Hz, 1H), 1.70 – 1.61 (m, 3H), 1.50 (d,  $J = 13.4$  Hz, 1H), 1.43 (td,  $J = 13.5, 3.0$  Hz, 1H), 1.37 (q,  $J = 12.2$  Hz, 1H), 1.22 (td,  $J = 13.3, 2.7$  Hz, 1H), 0.97 (d,  $J = 11.8$  Hz, 1H), 0.93 (s, 3H), 0.92 (s, 3H);  $^{13}\text{C NMR}$  (151 MHz,  $\text{CDCl}_3$ )  $\delta$  144.2, 142.9, 135.9, 135.8, 129.8, 128.5, 127.1, 126.3, 122.0, 121.2, 120.3, 72.2, 49.7, 43.1, 41.2, 39.5, 37.1, 33.5, 32.3, 24.4, 21.7, 20.6, 20.1, 18.9; **HRMS** (ES<sup>+</sup>)  $m/z$  calc'd for  $\text{C}_{26}\text{H}_{30}\text{N}_2\text{O}_2\text{SNa}$  [ $\text{M} + \text{Na}$ ]<sup>+</sup>: 457.1926, found 457.1926.

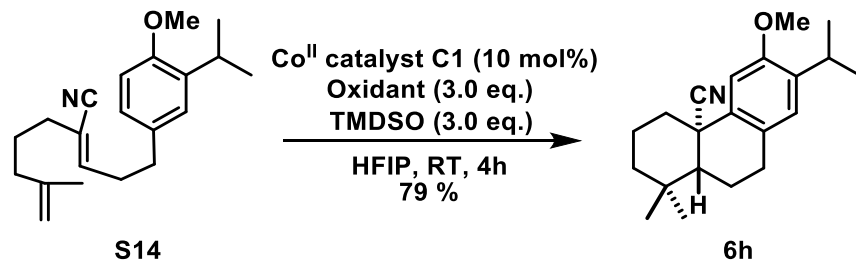

Prepared according to *general procedure D*, using  $\alpha,\beta$ -unsaturated nitrile **S14** (1.00 mmol), cobalt catalyst **C1** (0.10 mmol), 1-fluoro-2,4,6-trimethylpyridinium triflate (3.00 mmol), and 1,1,3,3-tetramethyldisiloxane (3.00 mmol). Yield: 79% of **6h** (245 mg, 0.79 mmol, white crystalline solid, spectral data were in accordance with that reported in the literature <sup>[28]</sup>);  $R_f=0.20$  (2:2.5:95.5 benzene/EtOAc/hexanes);  $^1\text{H NMR}$  (600 MHz,  $\text{CDCl}_3$ )  $\delta$  6.92 (s, 1H), 6.83 (s, 1H), 3.81 (s, 3H), 3.25 (sept,  $J = 6.9$  Hz, 1H), 3.00 – 2.88 (m, 1H), 2.85 – 2.75 (m, 2H), 2.10 – 1.98 (m, 2H), 1.89 – 1.83 (m, 1H), 1.82 – 1.77 (m, 1H), 1.59 (dd,  $J = 13.5, 1.3$  Hz, 1H), 1.52 (td,  $J = 13.3, 3.5$  Hz, 1H), 1.37 (dd,  $J = 12.1, 1.7$  Hz, 1H), 1.26 (td,  $J = 13.7, 3.7$  Hz, 1H), 1.19 (t,  $J = 7.1$  Hz, 6H), 1.16 (s, 3H), 1.01 (s, 3H);  $^{13}\text{C NMR}$  (151 MHz,  $\text{CDCl}_3$ )  $\delta$  155.63, 137.31, 135.70, 127.98, 127.35, 123.97, 107.22, 55.63, 50.65, 40.83, 40.26, 36.85, 33.76, 32.14, 29.77, 26.65, 22.73, 21.89, 20.121, 20.116; **HRMS** (ES+)  $m/z$  calc'd for  $\text{C}_{21}\text{H}_{29}\text{NONa}$   $[\text{M} + \text{Na}]^+$ : 334.2147, found 334.2153.

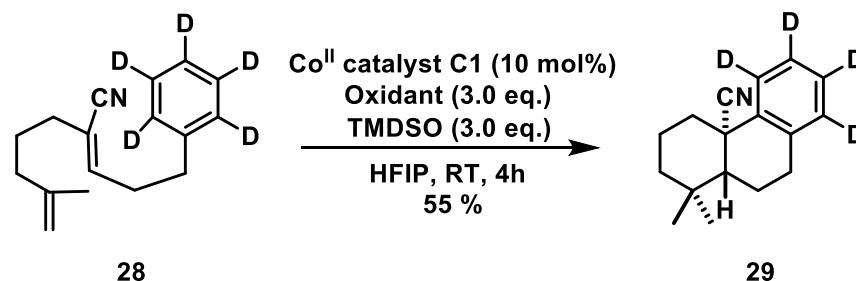

Prepared according to *general procedure D*, using  $\alpha,\beta$ -unsaturated nitrile **28** (0.53 mmol), cobalt catalyst **C1** (0.053 mmol), 1-fluoro-2,4,6-trimethylpyridinium triflate (1.60 mmol), and 1,1,3,3-tetramethyldisiloxane (1.60 mmol). Yield: 55% of **29** (72 mg, 0.29 mmol, white crystalline solid);  $R_f=0.15$  (1.5:98.5 EtOAc/hexanes- recrystallized from a mixture of methanol/hexanes);  $^1\text{H NMR}$  (600 MHz,  $\text{CDCl}_3$ )  $\delta$  3.09 (ddd,  $J = 17.1, 6.0, 1.7$  Hz, 1H), 2.95 (ddd,  $J = 18.6, 12.0, 6.7$  Hz, 1H), 2.89 (d,  $J =$



13.1 Hz, 1H), 2.14 (dd,  $J = 13.4, 6.5$  Hz, 1H), 2.08 (tt,  $J = 13.9, 3.3$  Hz, 1H), 1.95 (ddd,  $J = 25.6, 12.2, 6.0$  Hz, 1H), 1.89 – 1.82 (m, 1H), 1.66 (d,  $J = 13.5$  Hz, 1H), 1.56 (td,  $J = 13.4, 3.5$  Hz, 1H), 1.43 (dd,  $J = 12.1, 1.7$  Hz, 1H), 1.32 (td,  $J = 13.6, 3.7$  Hz, 1H), 1.22 (s, 3H), 1.07 (s, 3H);  $^{13}\text{C}$  DEPTQ NMR (151 MHz,  $\text{CDCl}_3$ )  $\delta$  137.9, 136.1, 129.4 (t,  $J = 24.0$  Hz), 127.3 (t,  $J = 24.4$  Hz), 126.1 (t,  $J = 24.8$  Hz), 125.2 (t,  $J = 24.0$  Hz), 123.6, 50.4, 40.7, 40.1, 36.7, 33.7, 32.0, 30.1, 21.5, 20.0, 20.0; HRMS (ES+)  $m/z$  calc'd for  $\text{C}_{17}\text{H}_{17}\text{D}_4\text{NNa}$   $[\text{M} + \text{Na}]^+$ : 266.1823, found 266.1826. To quantify the extent of deuterium incorporation ( $\sim 5\%$   $\text{D}_2$ ), the purified samples were analyzed by isotope ratio mass spectrometry modeling (flow injection analysis)- see the attached spectra.

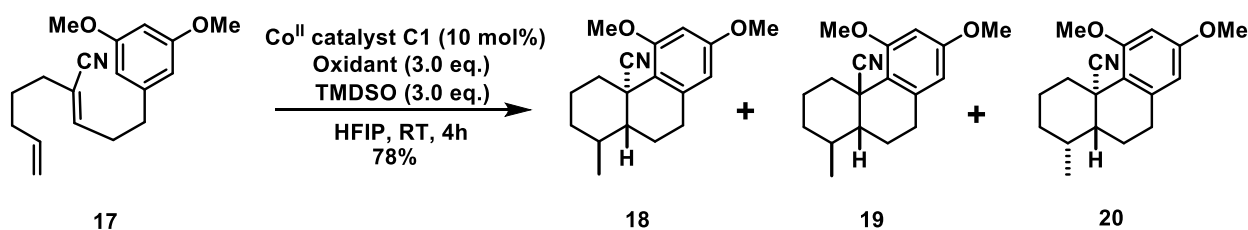

Prepared according to *general procedure D*, using  $\alpha,\beta$ -unsaturated nitrile **17** (0.31 mmol), cobalt catalyst **C1** (0.031 mmol), 1-fluoro-2,4,6-trimethylpyridinium triflate (0.92 mmol), and 1,1,3,3-tetramethyldisiloxane (0.92 mmol). Combined yield: 78% (69 mg, 0.24 mmol) - individual yields were determined from crude  $^1\text{H}$  NMR spectra, using an internal standard ( $\text{CH}_2\text{Br}_2$ ). Pure samples of each stereoisomer were obtained via extensive preparatory TLC (multiple developments using 5:1:4 benzene /chloroform /hexanes mixture as eluent).

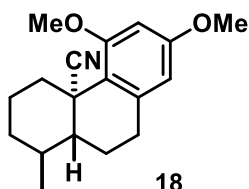

Stereoisomer **18**: white crystalline solid;  $R_f=0.15$  (5:1:4 benzene/chloroform/hexanes);  $^1\text{H}$  NMR (600 MHz,  $\text{CDCl}_3$ )  $\delta$  6.33 (d,  $J = 2.5$  Hz, 1H), 6.23 (d,  $J = 2.4$  Hz, 1H), 3.85 (s, 3H), 3.78 (s, 3H), 3.32 (d,  $J =$

13.1 Hz, 1H), 2.87 – 2.75 (m, 2H), 2.08 – 2.03 (m, 1H), 1.99 – 1.87 (m, 2H), 1.86 – 1.82 (m, 1H), 1.80 – 1.74 (m, 1H), 1.49 (ddd,  $J = 18.2, 12.7, 6.2$  Hz, 1H), 1.26 – 1.22 (m, 1H), 1.21 – 1.17 (m, 1H), 1.07 (ddd,  $J = 24.9, 13.2, 4.4$  Hz, 1H), 1.01 (d,  $J = 6.5$  Hz, 3H);  $^{13}\text{C}$  NMR (151 MHz,  $\text{CDCl}_3$ )  $\delta$  160.2, 159.9, 140.3, 122.2, 117.6, 105.3, 97.8, 55.6, 55.4, 51.8, 42.3, 35.7, 34.7, 33.1, 32.1, 23.5, 22.7, 20.1; HRMS (ES+)  $m/z$  calc'd for  $\text{C}_{18}\text{H}_{23}\text{NO}_2\text{Na}$   $[\text{M} + \text{Na}]^+$ : 308.1627, found 308.1637.

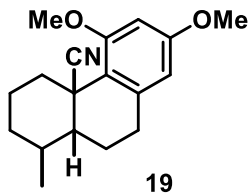

Stereoisomer **19**: white crystalline solid;  $R_f=0.13$  (5:1:4 benzene/chloroform/hexanes);  $^1\text{H}$  NMR (600 MHz,  $\text{CDCl}_3$ )  $\delta$  6.35 (d,  $J = 2.4$  Hz, 1H), 6.24 (d,  $J = 2.4$  Hz, 1H), 3.88 (s, 3H), 3.78 (s, 3H), 2.85 – 2.74 (m, 2H), 2.43 (d,  $J = 13.9$  Hz, 1H), 2.40 – 2.32 (m, 1H), 2.03 (d,  $J = 13.1$  Hz, 1H), 1.85 – 1.75 (m, 2H), 1.72 – 1.66 (m, 1H), 1.60 – 1.54 (m, 1H), 1.52 – 1.49 (m, 1H), 1.46 (td,  $J = 13.8, 3.9$  Hz, 1H), 1.13 (qd,  $J = 13.1, 3.9$  Hz, 1H), 1.01 (d,  $J = 6.9$  Hz, 3H);  $^{13}\text{C}$  NMR (151 MHz,  $\text{CDCl}_3$ )  $\delta$  159.8, 158.8, 138.4, 124.3, 118.3, 105.3, 97.9, 55.8, 55.4, 45.3, 40.1, 31.9, 30.9, 30.3, 28.5, 23.6, 19.8, 16.9; HRMS (ES+)  $m/z$  calc'd for  $\text{C}_{18}\text{H}_{23}\text{NO}_2\text{Na}$   $[\text{M} + \text{Na}]^+$ : 308.1627, found 308.1620.

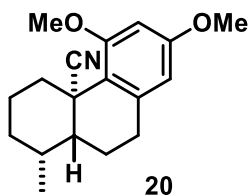

Stereoisomer **20**: white crystalline solid;  $R_f=0.14$  (5:1:4 benzene/chloroform/hexanes);  $^1\text{H}$  NMR (600 MHz,  $\text{CDCl}_3$ )  $\delta$  6.31 (d,  $J = 2.5$  Hz, 1H), 6.22 (d,  $J = 2.5$  Hz, 1H), 3.84 (s, 3H), 3.77 (s, 3H), 3.44 (d,  $J = 13.3$  Hz, 1H), 2.92 (ddd,  $J = 18.2, 12.6, 5.9$  Hz, 1H), 2.82 (dd,  $J = 16.5, 4.3$  Hz, 1H), 2.14 – 2.07 (m, 1H), 2.07 – 2.00 (m, 2H), 1.98 – 1.95 (m, 1H), 1.72 (ddd,  $J = 12.3, 4.5, 1.4$  Hz, 1H), 1.69 – 1.61 (m, 3H), 1.25

([overlapping with silicone grease signal] d,  $J = 6.5$  Hz, 3H), 1.18 (td,  $J = 13.4, 3.0$  Hz, 1H);  $^{13}\text{C}$  NMR (151 MHz,  $\text{CDCl}_3$ )  $\delta$  160.2, 159.8, 139.9, 123.7, 118.9, 105.4, 97.7, 55.5, 55.3, 47.1, 38.3, 35.3, 34.4, 32.6, 32.2, 26.3, 19.3, 13.7. HRMS (ES+)  $m/z$  calc'd for  $\text{C}_{18}\text{H}_{23}\text{NO}_2\text{Na}$   $[\text{M} + \text{Na}]^+$ : 308.1627, found 308.1628.

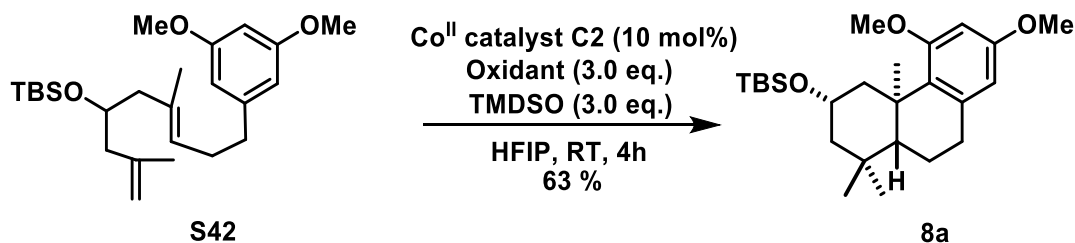

Prepared according to general procedure D, using terminal alkene **S42** (0.12 mmol), cobalt catalyst **C2** (0.012 mmol), 1-fluoro-2,4,6-trimethylpyridinium triflate (0.36 mmol), and 1,1,3,3-tetramethyldisiloxane (0.36 mmol). Yield: 63% of **8a** (32 mg, 0.08 mmol, white solid);  $R_f=0.20$  (2:98 EtOAc/hexanes);  $^1\text{H}$  NMR (500 MHz,  $\text{CDCl}_3$ )  $\delta$  6.28 (d,  $J = 2.5$  Hz, 1H), 6.19 (d,  $J = 2.4$  Hz, 1H), 4.01 (tt,  $J = 11.3, 4.1$  Hz, 1H), 3.77 (s, 3H), 3.76 (s, 3H), 3.45 – 3.34 (m, 1H), 2.89 – 2.80 (m, 2H), 1.83 – 1.76 (m, 1H), 1.75 – 1.68 (m, 1H), 1.55 – 1.49 (m, 1H), 1.29 (s, 3H), 1.27 – 1.21 (m, 2H), 1.15 – 1.08 (m, 1H), 0.99 (s, 3H), 0.95 (s, 3H), 0.94 (s, 9H), 0.12 (s, 6H);  $^{13}\text{C}$  NMR (126 MHz,  $\text{CDCl}_3$ )  $\delta$  159.6, 158.0, 138.6, 129.8, 105.1, 97.7, 66.5, 55.2, 55.1, 52.9, 51.1, 46.1, 40.4, 34.8, 34.2, 33.6, 26.3(3C), 23.1, 20.9, 18.8, 18.6, –4.3(2C); HRMS (ES+)  $m/z$  calc'd for  $\text{C}_{25}\text{H}_{42}\text{O}_3\text{SiNa}$   $[\text{M} + \text{Na}]^+$ : 441.2801, found 441.2818.

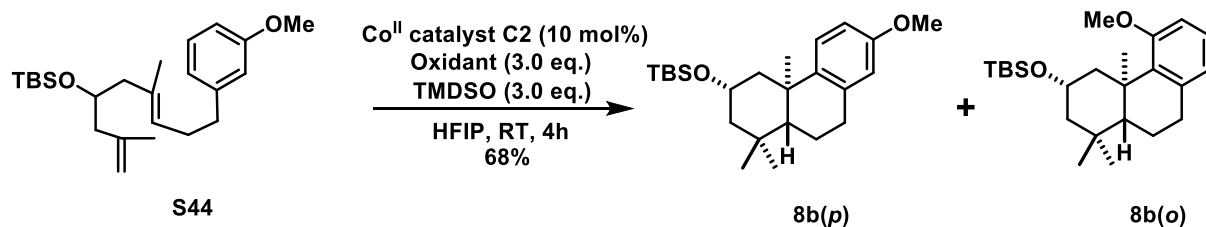

Prepared according to general procedure D, using terminal alkene **S44** (0.13 mmol), cobalt catalyst **C2** (0.013 mmol), 1-fluoro-2,4,6-trimethylpyridinium triflate (0.39 mmol), and 1,1,3,3-tetramethyldisiloxane

(0.39 mmol). Combined yield: 68%; *p*-regioisomer **8b(p)**: Yield: 41% (21 mg, 0.053 mmol, white solid);  $R_f=0.14$  (5:1:94 benzene/EtOAc/hexanes);  $^1\text{H NMR}$  (600 MHz,  $\text{CDCl}_3$ )  $\delta$  7.17 (d,  $J = 8.7$  Hz, 1H), 6.70 (dd,  $J = 8.7, 2.8$  Hz, 1H), 6.58 (d,  $J = 2.7$  Hz, 1H), 4.03 (tt,  $J = 11.3, 4.0$  Hz, 1H), 3.76 (s, 3H), 2.93 (dd,  $J = 17.2, 6.6$  Hz, 1H), 2.89 – 2.81 (m, 1H), 2.44 (ddd,  $J = 12.2, 3.6, 2.2$  Hz, 1H), 1.87 (dd,  $J = 13.3, 7.7$  Hz, 1H), 1.75 – 1.70 (m, 1H), 1.70 – 1.64 (m, 1H), 1.38 (t,  $J = 11.7$  Hz, 1H), 1.30 (dd,  $J = 12.6, 2.3$  Hz, 1H), 1.26 (t,  $J = 12.1$  Hz, 1H), 1.18 (s, 3H), 0.99 (s, 3H), 0.96 (s, 3H), 0.94 (s, 9H), 0.13 (s, 3H), 0.12 (s, 3H);  $^{13}\text{C NMR}$  (151 MHz,  $\text{CDCl}_3$ )  $\delta$  157.3, 142.1, 136.4, 125.4, 113.4, 112.0, 66.4, 55.3, 51.3, 49.9, 48.4, 39.0, 34.8, 33.5, 30.6, 26.2, 26.0, 22.7, 18.9, 18.5, –4.30, –4.33; **HRMS** (ES+)  $m/z$  calc'd for  $\text{C}_{24}\text{H}_{40}\text{O}_2\text{SiNa}$   $[\text{M} + \text{Na}]^+$ : 411.2695, found 411.2693.

*o*-regioisomer **8b(o)**: Yield: 27% (14 mg, 0.035 mmol, white solid);  $R_f=0.15$  (5:1:94 benzene/EtOAc/hexanes);  $^1\text{H NMR}$  (600 MHz,  $\text{CDCl}_3$ )  $\delta$  7.05 (t,  $J = 7.8$  Hz, 1H), 6.70 – 6.65 (m, 2H), 4.02 (tt,  $J = 11.3, 4.2$  Hz, 1H), 3.79 (s, 3H), 3.45 (ddd,  $J = 12.6, 3.7, 2.2$  Hz, 1H), 2.88–2.66 (m, 2H), 1.83 – 1.77 (m, 1H), 1.72 (ddd,  $J = 12.5, 4.2, 2.2$  Hz, 1H), 1.32 (s, 3H), 1.27 – 1.22 (m, 3H), 1.15 (t,  $J = 12.0$  Hz, 1H), 1.00 (s, 3H), 0.96 (s, 3H), 0.94 (s, 9H), 0.12 (s, 6H);  $^{13}\text{C NMR}$  (151 MHz,  $\text{CDCl}_3$ )  $\delta$  158.6, 138.0, 136.9, 126.3, 122.4, 109.3, 66.5, 55.1, 52.7, 51.0, 45.8, 40.9, 34.8, 34.2, 33.1, 26.3(3C), 23.2, 20.7, 18.8, 18.7, –4.3(2C); **HRMS** (ES+)  $m/z$  calc'd for  $\text{C}_{24}\text{H}_{40}\text{O}_2\text{SiNa}$   $[\text{M} + \text{Na}]^+$ : 411.2695, found 411.2697.

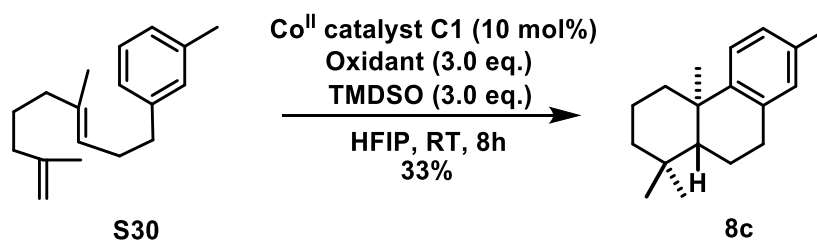

Prepared according to general procedure D, using terminal alkene **S30** (0.21 mmol), cobalt catalyst **C1** (0.021 mmol), 1-fluoro-2,4,6-trimethylpyridinium triflate (0.62 mmol), and 1,1,3,3-tetramethyldisiloxane (0.62 mmol). Yield: 33% of **8c** (17 mg, 0.07 mmol, white solid, ~80% purity by  $^1\text{H NMR}$ );  $R_f=0.64$  (hexanes); spectral data were in accordance with that reported in the literature<sup>[29]</sup>:  $^1\text{H NMR}$ ;

**NMR** (500 MHz, CDCl<sub>3</sub>) δ 7.15 (d, *J* = 8.0 Hz, 1H), 6.94 (d, *J* = 8.3 Hz, 1H), 6.86 (s, 1H), 2.90 (dd, *J* = 16.4, 6.5 Hz, 1H), 2.86 – 2.78 (m, 1H), 2.27 (s, 4H), 1.90 – 1.83 (m, 1H), 1.77 – 1.72 (m, 1H), 1.71 – 1.66 (m, 1H), 1.63 – 1.57 (m, 2H), 1.48 (d, *J* = 13.3 Hz, 1H), 1.38 (td, *J* = 13.3, 3.7 Hz, 1H), 1.32 (dd, *J* = 12.5, 2.3 Hz, 1H), 1.23 (dd, *J* = 13.7, 3.8 Hz, 1H), 1.18 (s, 3H), 0.94 (s, 3H), 0.93 (s, 3H); **<sup>13</sup>C NMR** (151 MHz, CDCl<sub>3</sub>) δ 147.5, 135.3, 134.7, 129.7, 126.6, 124.5, 77.4, 77.2, 77.0, 50.7, 41.9, 39.1, 37.6, 33.6, 33.5, 30.5, 25.0, 21.8, 20.9, 19.5, 19.2.

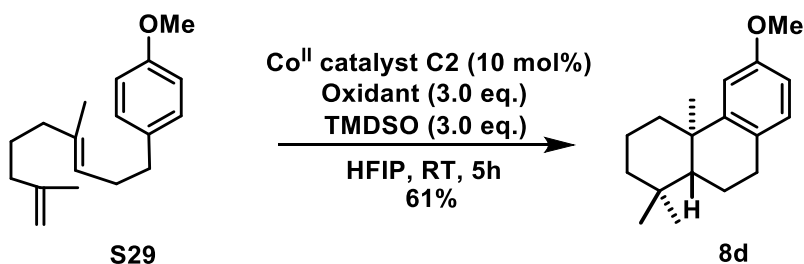

Prepared according to *general procedure D*, using terminal alkene **S29** (0.39 mmol), cobalt catalyst **C2** (0.039 mmol), 1-fluoro-2,4,6-trimethylpyridinium triflate (1.16 mmol), and 1,1,3,3-tetramethyldisiloxane (1.16 mmol). Yield: 61% of **8d** (61 mg, 0.24 mmol, white crystalline solid, *spectral data were in accordance with that reported in the literature*<sup>[30]</sup>); *R<sub>f</sub>*=0.15 (1:99 EtOAc/hexanes); **<sup>1</sup>H NMR** (600 MHz, CDCl<sub>3</sub>) δ 6.96 (d, *J* = 8.4 Hz, 1H), 6.82 (d, *J* = 2.6 Hz, 1H), 6.66 (dd, *J* = 8.3, 2.7 Hz, 1H), 3.78 (s, 3H), 2.89 (dd, *J* = 16.4, 6.4 Hz, 1H), 2.84 – 2.73 (m, 1H), 2.25 (d, *J* = 12.7 Hz, 1H), 1.87 (dd, *J* = 13.2, 7.6 Hz, 1H), 1.80 – 1.71 (m, 1H), 1.70 – 1.65 (m, 1H), 1.64 – 1.59 (m, 1H), 1.48 (dd, *J* = 13.2, 1.2 Hz, 1H), 1.41 (td, *J* = 12.9, 3.5 Hz, 1H), 1.33 (dd, *J* = 12.5, 2.3 Hz, 1H), 1.22 (td, *J* = 13.5, 4.0 Hz, 1H), 1.19 (s, 3H), 0.95 (s, 3H), 0.93 (s, 3H); **<sup>13</sup>C NMR** (151 MHz, CDCl<sub>3</sub>) δ 157.8, 151.6, 129.9, 127.6, 110.8, 110.3, 55.4, 50.5, 41.8, 39.0, 38.2, 33.6, 33.5, 29.7, 24.9, 21.8, 19.5, 19.3; **HRMS** (ES+) *m/z* calc'd for C<sub>18</sub>H<sub>26</sub>O<sub>3</sub> [M]<sup>+</sup>: 258.19484, found 258.1978.

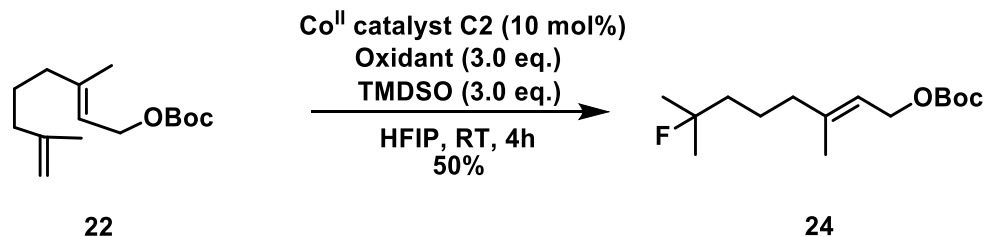

Prepared according to general procedure D, using terminal alkene **22** (0.20 mmol), cobalt catalyst **C2** (0.020 mmol), 1-fluoro-2,4,6-trimethylpyridinium triflate (0.60 mmol), and 1,1,3,3-tetramethyldisiloxane (0.60 mmol). Yield: 50% of **24** (25 mg, 0.10 mmol, clear colorless oil);  $R_f=0.40$  (1:9 EtOAc/hexanes);  
 Note: The sample contained other regio- and stereoisomers, which could not be separated (~70% purity).

$^1\text{H NMR}$  (600 MHz,  $\text{CDCl}_3$ )  $\delta$  5.37 (t,  $J = 7.1$  Hz, 1H), 4.58 (d,  $J = 7.1$  Hz, 2H), 2.04 (t,  $J = 7.0$  Hz, 2H), 1.70 (s, 3H), 1.59 – 1.55 (m, 2H), 1.55 – 1.50 (m, 2H), 1.48 (s, 9H), 1.33 (d,  $J = 21.4$  Hz, 6H);  $^{13}\text{C NMR}$  (151 MHz,  $\text{CDCl}_3$ )  $\delta$  153.8, 142.4, 118.6, 95.7 (d,  $J = 164.6$  Hz), 82.0, 63.8, 41.0 (d,  $J = 23.0$  Hz), 39.7, 27.9, 26.8 (d,  $J = 24.9$  Hz), 21.93, 21.91 (d,  $J = 5.1$  Hz), 16.4; **HRMS** (ES+)  $m/z$  calc'd for  $\text{C}_{15}\text{H}_{27}\text{FO}_3\text{Na}$   $[\text{M} + \text{Na}]^+$ : 297.1841, found 297.1836.

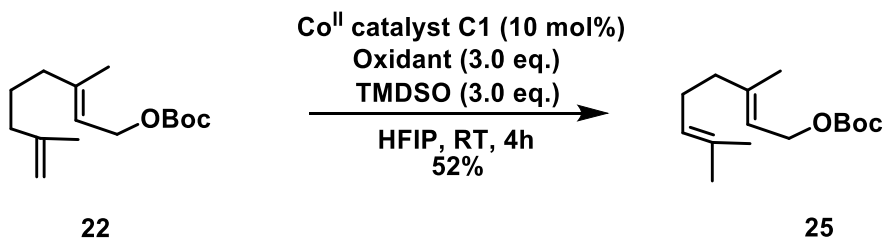

Prepared according to general procedure D, using terminal alkene **22** (0.20 mmol), cobalt catalyst **C1** (0.020 mmol), 1-fluoro-2,4,6-trimethylpyridinium triflate (0.60 mmol), and 1,1,3,3-tetramethyldisiloxane (0.60 mmol). Yield: 52% of **25** (26 mg, 0.10 mmol, clear colorless oil);  $R_f=0.40$  (1:9 EtOAc/hexanes);  
 spectral data were in accordance with that reported in the literature<sup>[31]</sup>;  $^1\text{H NMR}$  (600 MHz,  $\text{CDCl}_3$ )  $\delta$  5.37 (td,  $J = 7.1, 1.1$  Hz, 1H), 5.08 (t,  $J = 6.8$  Hz, 1H), 4.59 (d,  $J = 7.1$  Hz, 2H), 2.13 – 2.06 (m, 2H), 2.06 – 2.01 (m, 2H), 1.70 (s, 3H), 1.68 (s, 3H), 1.59 (s, 3H), 1.48 (s, 9H);  $^{13}\text{C NMR}$  (151 MHz,  $\text{CDCl}_3$ )  $\delta$  153.8, 142.7, 132.0, 123.9, 118.2, 82.0, 63.9, 39.7, 28.0, 26.4, 25.8, 17.8, 16.7; **HRMS** (ES+)  $m/z$  calc'd for  $\text{C}_{15}\text{H}_{26}\text{O}_3\text{Na}$   $[\text{M} + \text{Na}]^+$ : 277.1780, found 277.1784.

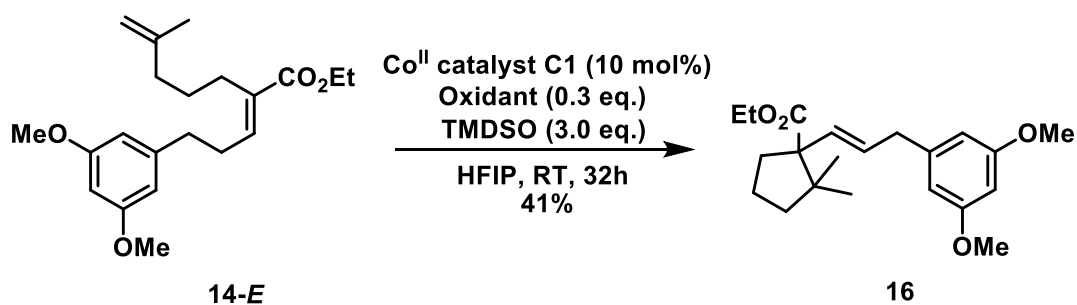

Prepared according to *general procedure D*, using  $\alpha,\beta$ -unsaturated ethyl ester **14-E** (0.14 mmol), cobalt catalyst **C1** (0.014 mmol), 1-fluoro-2,4,6-trimethylpyridinium triflate (0.05 mmol), and 1,1,3,3-tetramethyldisiloxane (0.42 mmol). Yield: 41% of **16** (21 mg, 0.06 mmol, clear colorless oil);  $R_f=0.15$  (2:98 EtOAc/hexanes);  $^1\text{H NMR}$  (500 MHz,  $\text{CDCl}_3$ )  $\delta$  6.33 (d,  $J = 1.9$  Hz, 2H), 6.31 (t,  $J = 2.1$  Hz, 1H), 5.90 (d,  $J = 15.7$  Hz, 1H), 5.62 – 5.50 (m, 1H), 4.19 – 4.09 (m, 2H), 3.76 (s, 6H), 3.34 (d,  $J = 6.9$  Hz, 2H), 2.44 – 2.35 (m, 1H), 1.98 – 1.91 (m, 1H), 1.82 – 1.71 (m, 1H), 1.67 – 1.57 (m, 2H), 1.54 – 1.48 (m, 1H), 1.27 (t,  $J = 7.1$  Hz, 3H), 1.06 (s, 3H), 0.94 (s, 3H);  $^{13}\text{C NMR}$  (126 MHz,  $\text{CDCl}_3$ )  $\delta$  175.0, 160.9, 143.3, 133.1, 127.8, 106.6, 98.3, 60.9, 60.4, 55.4, 46.1, 39.7, 39.5, 30.7, 25.3, 24.6, 19.9, 14.4; **HRMS** (ES+)  $m/z$  calc'd for  $\text{C}_{21}\text{H}_{30}\text{O}_4\text{Na}$   $[\text{M} + \text{Na}]^+$ : 369.2042, found 369.2045.

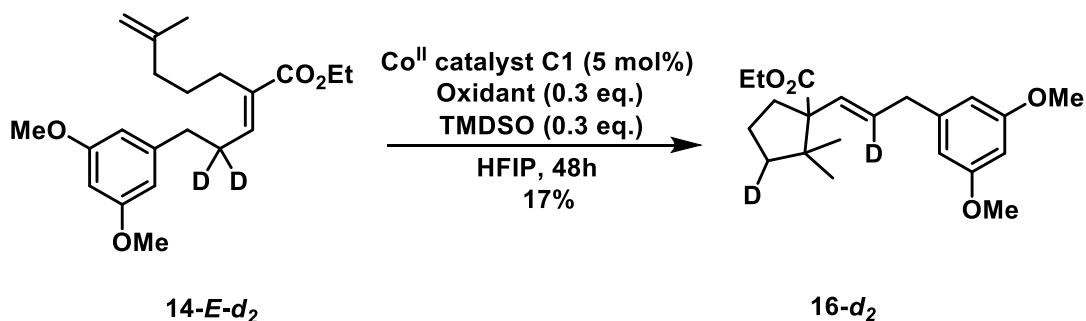

Prepared according to *general procedure D*, using  $\alpha,\beta$ -unsaturated ethyl ester **14-E-d<sub>2</sub>** (0.066 mmol), cobalt catalyst **C1** (0.0033 mmol), 1-fluoro-2,4,6-trimethylpyridinium triflate (0.02 mmol), and 1,1,3,3-tetramethyldisiloxane (0.020 mmol). Note: *the reaction time was 48h*. The crude reaction mixture contained a considerable amount of isomerized starting material. Yield: 17% of **16-d<sub>2</sub>** (4 mg, 0.011 mmol, clear colorless oil);  $R_f=0.15$  (2:98 EtOAc/hexanes – purified via PTLC);  $^1\text{H NMR}$  (600 MHz,

CDCl<sub>3</sub>)  $\delta$  6.33 (d,  $J$  = 2.0 Hz, 2H), 6.31 (t,  $J$  = 2.0 Hz, 1H), 5.90 (s, 1H), 4.17 – 4.09 (m, 2H), 3.76 (s, 6H), 3.34 (s, 2H), 2.47 – 2.32 (m, 1H), 1.98 – 1.90 (m, 1H), 1.80 – 1.72 (m, 1H), 1.65 – 1.58 (m, 2H), 1.53 – 1.47 (m, 1H), 1.27 (t,  $J$  = 7.1 Hz, 3H), 1.06 (s, 3H), 0.94 (s, 3H); <sup>13</sup>C NMR (151 MHz, CDCl<sub>3</sub>)  $\delta$  175.0, 160.9 (2C), 143.3, 132.9, 127.5 (t,  $J$  = 23.0 Hz), 106.6 (2C), 98.3, 60.9, 60.4, 55.4 (2C), 46.1, 39.6, 39.4, 30.6, 25.3, 24.6, 19.9, 14.4; HRMS (ES<sup>+</sup>)  $m/z$  calc'd for C<sub>21</sub>H<sub>28</sub>D<sub>2</sub>O<sub>4</sub>Na [M + Na]<sup>+</sup>: 371.2167, found 371.2175. To quantify the extent of deuterium incorporation (~38% D<sub>2</sub>), the purified samples were analyzed by isotope ratio mass spectrometry modeling (flow injection analysis)- see the attached spectra.

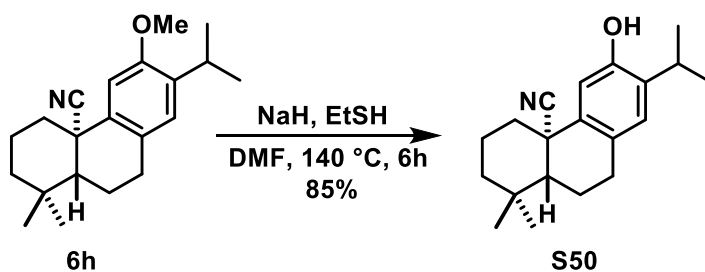

To a cooled (4 °C) suspension of sodium hydride (60% in mineral oil, 167 mg, 4.18 mmol, 10 equiv.) in DMF (2.0 mL), ethanethiol (0.6 mL, 8.36 mmol, 20 equiv.) was added dropwise. The resulting mixture was stirred for 30 min. while warming to ambient temperature, then a solution of **6h** (130 mg, 0.42 mmol, 1.0 equiv.) in DMF (1.0 mL) was added and the mixture was heated to 140 °C. After stirring for 6 hours, the mixture was cooled to ambient temperature, diluted with Et<sub>2</sub>O (20 mL) and a solution of 2N HCl<sub>(aq.)</sub> (5 mL) was added. After stirring vigorously for 15 min., the organic phase was washed with DI H<sub>2</sub>O (3 x 10 mL), then brine (10 mL), dried over Na<sub>2</sub>SO<sub>4</sub>, filtered and concentrated *in vacuo*. The crude residue was purified via flash column chromatography (EtOAc/ hexanes 15:85, R<sub>f</sub> = 0.34) to give **S50** as a white solid (106 mg, 0.355 mmol, 85 % yield); <sup>1</sup>H NMR (600 MHz, CDCl<sub>3</sub>)  $\delta$  6.90 (s, 1H), 6.80 (s, 1H), 5.15 (s (broad), 1H), 3.15 (hept,  $J$  = 6.9 Hz, 1H), 2.93 (dd,  $J$  = 16.7, 4.9 Hz, 1H), 2.84 – 2.75 (m, 1H), 2.69 (d,  $J$  = 13.1 Hz, 1H), 2.06 (dd,  $J$  = 13.4, 6.4 Hz, 1H), 2.00 (qt,  $J$  = 13.9, 3.2 Hz, 1H), 1.83 (qd,  $J$  = 12.3, 5.9 Hz,



1H), 1.79 – 1.74 (m, 1H), 1.58 (d,  $J = 13.4$  Hz, 1H), 1.48 (td,  $J = 13.4, 3.5$  Hz, 1H), 1.35 (dd,  $J = 12.1, 1.5$  Hz, 1H), 1.23 (d,  $J = 6.9$  Hz, 3H), 1.21 (d,  $J = 6.9$  Hz, 3H), 1.15 (s, 3H), 1.00 (s, 3H);  $^{13}\text{C}$  DEPTQ NMR (151 MHz,  $\text{CDCl}_3$ )  $\delta$  151.7, 135.8, 135.0, 128.1, 127.6, 123.9, 112.1, 50.5, 40.8, 40.0, 36.8, 33.7, 32.1, 29.7, 27.0, 22.7, 22.6, 21.9, 20.08, 20.07; HRMS (ES+)  $m/z$  calc'd for  $\text{C}_{20}\text{H}_{27}\text{NONa}$   $[\text{M} + \text{Na}]^+$ : 320.1990, found 320.1992.

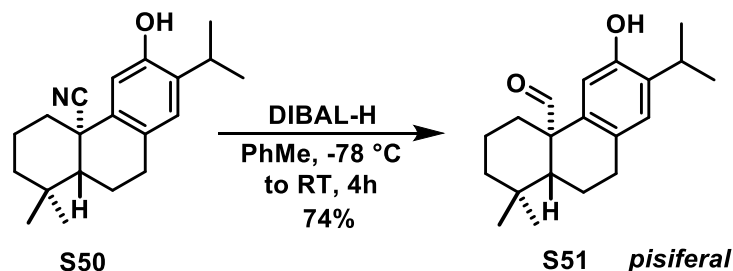

To a cooled ( $-78\text{ }^\circ\text{C}$ ) solution of nitrile **S50** (8 mg, 0.027 mmol, 1 equiv.) in toluene (0.5 mL), a 1.0 M solution of diisobutylaluminum hydride (0.8 mL, 0.80 mmol, 30 equiv.) was added dropwise. The resulting mixture was stirred at  $-78\text{ }^\circ\text{C}$  for 2 hours, warmed to ambient temperature, quenched with a saturated aqueous solution of sodium potassium tartrate (2.0 mL) and stirred vigorously for 1 h. The aqueous phase was extracted with EtOAc (3 x 3 mL), then the combined organic extracts were washed with brine (5 mL), dried over  $\text{Na}_2\text{SO}_4$ , filtered and concentrated *in vacuo*. The resulting crude residue was purified via flash column chromatography on  $\text{SiO}_2$ , using a mixture of EtOAc/ hexanes (6:94) as eluent to give **S51** (+/- *pisiferal*) as a white solid (6 mg, 0.020 mmol, 74% yield, *spectral data are in agreement with that reported in the literature*<sup>[32]</sup>);  $^1\text{H}$  NMR (600 MHz,  $\text{CDCl}_3$ )  $\delta$  9.90 (s, 1H), 6.92 (s, 1H), 6.60 (s, 1H), 5.40 (s (broad), 1H), 3.16 (hept,  $J = 6.8$  Hz, 1H), 2.99 – 2.85 (m, 3H), 2.14 – 2.01 (m, 2H), 1.76 – 1.57 (m, 3H), 1.46 (d,  $J = 13.2$  Hz, 1H), 1.27 (td,  $J = 13.5, 4.3$  Hz, 1H), 1.22 (d,  $J = 6.9$  Hz, 3H), 1.22 (d,  $J = 6.8$  Hz, 3H), 1.20 – 1.16 (m, 1H), 1.00 (s, 3H), 0.83 (s, 3H);  $^{13}\text{C}$  DEPTQ NMR (151 MHz,  $\text{CDCl}_3$ )  $\delta$  201.5, 152.0, 134.5, 133.2, 130.4, 127.4, 113.9, 53.4, 51.9, 41.4, 34.0, 32.7, 31.7, 30.2, 27.0, 22.7, 22.5, 20.7, 19.7, 18.5; HRMS (ES+)  $m/z$  calc'd for  $\text{C}_{20}\text{H}_{27}\text{O}_2$   $[\text{M} - \text{H}]^-$ : 299.2011, found 299.2023.

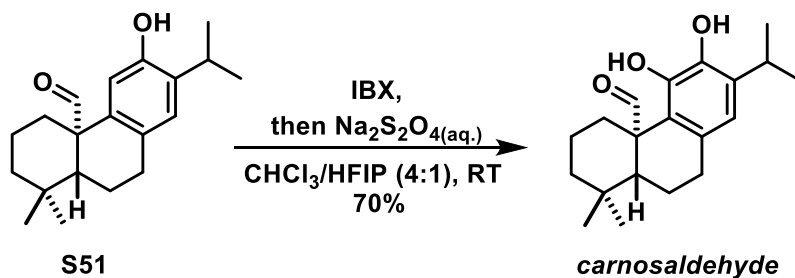

To a solution of **S51** (8 mg, 0.027 mmol, 1 equiv.) in a mixture of  $\text{CHCl}_3$  and HFIP (4:1, 0.5 mL) was added 2-Iodoxybenzoic acid (14 mg, 0.049 mmol, 1.5 equiv.). The resulting suspension was stirred in the dark for 3 hours or until **S51** was consumed as determined via TLC. Then, a saturated solution of  $\text{Na}_2\text{S}_2\text{O}_4(\text{aq.})$  (2.0 mL) was added and the biphasic mixture was stirred vigorously for 3 hours. The aqueous phase was extracted with  $\text{CHCl}_3$  (3 x 3.0 mL), then the combined organic extracts were washed with satd.  $\text{NaHCO}_3(\text{aq.})$  (5.0 mL), brine (5.0 mL), dried over  $\text{Na}_2\text{SO}_4$ , filtered and concentrated *in vacuo*. The resulting crude residue was purified via flash column chromatography on  $\text{SiO}_2$ , using a mixture of EtOAc/ hexanes (7:93) as eluent to give +/- **carnosaldehyde** as a white solid (6 mg, 0.019 mmol, 70% yield, *spectral data are in agreement with that reported in the literature- only  $^1\text{H NMR data}^{[33]}$  is known*);  $^1\text{H NMR}$  (600 MHz,  $\text{CDCl}_3$ )  $\delta$  9.90 (s, 1H), 7.13 (s, 1H), 6.60 (s, 1H), 5.78 (s, 1H), 3.28 – 3.19 (m, 2H), 2.87 (dd,  $J = 8.5, 3.5$  Hz, 2H), 2.03 (d,  $J = 13.3$  Hz, 1H), 1.86 (tt,  $J = 13.2, 8.9$  Hz, 1H), 1.62 (d,  $J = 12.1$  Hz, 1H), 1.60 – 1.52 (m, 2H), 1.48 (d,  $J = 13.4$  Hz, 1H), 1.33 (td,  $J = 13.1, 4.9$  Hz, 1H), 1.21 (d,  $J = 6.9$  Hz, 6H), 1.14 (td,  $J = 13.0, 3.1$  Hz, 1H), 1.04 (s, 3H), 0.90 (s, 3H);  $^{13}\text{C DEPTQ NMR}$  (151 MHz,  $\text{CDCl}_3$ )  $\delta$  203.7, 143.4, 142.5, 134.7, 130.1, 119.5, 116.4, 116.3, 54.1, 53.1, 41.5, 34.4, 32.0, 31.7, 30.6, 27.3, 22.5, 22.3, 21.7, 19.8, 19.0; **HRMS** (ES+)  $m/z$  calc'd for  $\text{C}_{20}\text{H}_{28}\text{O}_3$   $[\text{M} - \text{H}]^-$ : 315.1960, found 315.1950.

Comparison table of  $^1\text{H}$  NMR data [ $\delta_{\text{H}}$  (J, Hz)] for natural<sup>[33]</sup> and synthetic **carnosaldehyde**:

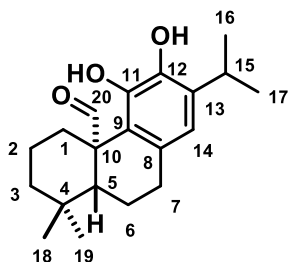

Note: some signals have been reassigned based on 2D NMR data (highlighted in green). Aside from minor impurities in the natural sample, the spectra are practically identical. \*Overlapping signals.

| $^1\text{H}$ Signal | natural carnosaldehyde | synthetic carnosaldehyde |
|---------------------|------------------------|--------------------------|
| 1 $\alpha$          | 1.13 m                 | 1.14 td (13.0, 3.1)      |
| 1 $\beta$           | 3.22 m*                | 3.28 – 3.19 m*           |
| 2 $\alpha$          | 1.48 – 1.59 m*         | 1.60 – 1.52 m*           |
| 2 $\beta$           | 1.48 – 1.59 m*         | 1.60 – 1.52 m*           |
| 3 $\alpha$          | 1.15 – 1.36 m*         | 1.33 td (13.1, 4.9)      |
| 3 $\beta$           | 1.15 – 1.36 m*         | 1.48 d, (13.4)           |
| 5                   | 1.62 dd (12.7, 1.7)    | 1.62 d (12.1)            |
| 6 $\alpha$          | 2.03 m                 | 1.86 tt, (13.2, 8.9)     |
| 6 $\beta$           | 1.86 tt (13.2, 8.7)    | 2.03 d (13.3)            |
| 7 $\alpha$          | 2.87 dd (8.5, 3.6)     | 2.87 dd (8.5, 3.5)       |
| 7 $\beta$           | 2.87 dd (8.5, 3.6)     | 2.87 dd (8.5, 3.5)       |
| 14                  | 6.60 s                 | 6.60 s                   |
| 15                  | 3.23 m*                | 3.28 – 3.19 m*           |
| 16                  | 1.21 d (6.9)           | 1.21 d (6.9)             |
| 17                  | 1.21 d (6.9)           | 1.21 d (6.9)             |
| 18                  | 1.04 s                 | 1.04 s                   |
| 19                  | 0.9 s                  | 0.90 s                   |
| 20                  | 9.9 d (1.5)            | 9.90 s                   |
| 11-OH               | 7.13 s                 | 7.13 s                   |
| 12-OH               | 5.78 s                 | 5.78 s                   |

## *E. X-Ray Crystallographic Data*

### *X-ray Data Collection, Structure Solution and Refinement for cdv56 (6e)*

A colorless crystal of approximate dimensions 0.198 x 0.243 x 0.417 mm was mounted in a cryoloop and transferred to a Bruker SMART APEX II diffractometer. The APEX2<sup>1</sup> program package was used to determine the unit-cell parameters and for data collection (30 sec/frame scan time for a sphere of diffraction data). The raw frame data was processed using SAINT<sup>2</sup> and SADABS<sup>3</sup> to yield the reflection data file. Subsequent calculations were carried out using the SHELXTL<sup>4</sup> program. There were no systematic absences nor any diffraction symmetry other than the Friedel condition. The centrosymmetric triclinic space group  $P\bar{1}$  was assigned and later determined to be correct.

The structure was solved by dual space methods and refined on  $F^2$  by full-matrix least-squares techniques. The analytical scattering factors<sup>5</sup> for neutral atoms were used throughout the analysis. Hydrogen atoms were located from a difference-Fourier map and refined (x,y,z and  $U_{\text{iso}}$ ).

Least-squares analysis yielded  $wR2 = 0.1161$  and  $Goof = 1.047$  for 291 variables refined against 3705 data (0.74 Å),  $R1 = 0.0393$  for those 3247 data with  $I > 2.0\sigma(I)$ .

#### References.

1. APEX2 Version 2014.11-0, Bruker AXS, Inc.; Madison, WI 2014.
2. SAINT Version 8.34a, Bruker AXS, Inc.; Madison, WI 2013.
3. Sheldrick, G. M. SADABS, Version 2014/5, Bruker AXS, Inc.; Madison, WI 2014.
4. Sheldrick, G. M. SHELXTL, Version 2014/7, Bruker AXS, Inc.; Madison, WI 2014.
5. International Tables for Crystallography 1992, Vol. C., Dordrecht: Kluwer Academic Publishers.

---

#### Definitions:

$$wR2 = [\Sigma[w(F_o^2 - F_c^2)^2] / \Sigma[w(F_o^2)^2]]^{1/2}$$

$$R1 = \Sigma||F_o| - |F_c|| / \Sigma|F_o|$$

Goof =  $S = [\sum[w(F_o^2 - F_c^2)^2] / (n-p)]^{1/2}$  where n is the number of reflections and p is the total number of parameters refined.

The thermal ellipsoid plot is shown at the 50% probability level.



Table 1. Crystal data and structure refinement for cdv56.

|                                         |                                             |                                 |
|-----------------------------------------|---------------------------------------------|---------------------------------|
| Identification code                     | cdv56 (Darius Vrubliauskas)                 |                                 |
| Empirical formula                       | C <sub>21</sub> H <sub>23</sub> N           |                                 |
| Formula weight                          | 289.40                                      |                                 |
| Temperature                             | 133(2) K                                    |                                 |
| Wavelength                              | 0.71073 Å                                   |                                 |
| Crystal system                          | Triclinic                                   |                                 |
| Space group                             | $P\bar{1}$                                  |                                 |
| Unit cell dimensions                    | a = 8.0668(10) Å                            | $\alpha = 108.7911(14)^\circ$ . |
|                                         | b = 8.2309(10) Å                            | $\beta = 96.3755(15)^\circ$ .   |
|                                         | c = 12.7071(15) Å                           | $\gamma = 97.8034(14)^\circ$ .  |
| Volume                                  | 780.50(16) Å <sup>3</sup>                   |                                 |
| Z                                       | 2                                           |                                 |
| Density (calculated)                    | 1.231 Mg/m <sup>3</sup>                     |                                 |
| Absorption coefficient                  | 0.071 mm <sup>-1</sup>                      |                                 |
| F(000)                                  | 312                                         |                                 |
| Crystal color                           | colorless                                   |                                 |
| Crystal size                            | 0.417 x 0.243 x 0.198 mm <sup>3</sup>       |                                 |
| Theta range for data collection         | 1.716 to 28.741°                            |                                 |
| Index ranges                            | -10 ≤ h ≤ 10, -10 ≤ k ≤ 11, -16 ≤ l ≤ 16    |                                 |
| Reflections collected                   | 9432                                        |                                 |
| Independent reflections                 | 3705 [R(int) = 0.0275]                      |                                 |
| Completeness to theta = 25.242°         | 99.9 %                                      |                                 |
| Absorption correction                   | Semi-empirical from equivalents             |                                 |
| Max. and min. transmission              | 0.7458 and 0.6770                           |                                 |
| Refinement method                       | Full-matrix least-squares on F <sup>2</sup> |                                 |
| Data / restraints / parameters          | 3705 / 0 / 291                              |                                 |
| Goodness-of-fit on F <sup>2</sup>       | 1.047                                       |                                 |
| Final R indices [I > 2σ(I) = 3247 data] | R1 = 0.0393, wR2 = 0.1111                   |                                 |
| R indices (all data, 0.74 Å)            | R1 = 0.0443, wR2 = 0.1161                   |                                 |
| Largest diff. peak and hole             | 0.364 and -0.222 e.Å <sup>-3</sup>          |                                 |

Table 2. Atomic coordinates ( $\times 10^4$ ) and equivalent isotropic displacement parameters ( $\text{\AA}^2 \times 10^3$ ) for cdv56.  $U(\text{eq})$  is defined as one third of the trace of the orthogonalized  $U^{ij}$  tensor.

|       | x        | y       | z       | $U(\text{eq})$ |
|-------|----------|---------|---------|----------------|
| N(1)  | 6114(1)  | 6143(1) | 8157(1) | 24(1)          |
| C(1)  | 6249(1)  | 2836(1) | 7150(1) | 14(1)          |
| C(2)  | 4434(1)  | 1777(1) | 6952(1) | 17(1)          |
| C(3)  | 3882(1)  | 1745(1) | 8057(1) | 19(1)          |
| C(4)  | 5119(1)  | 1014(1) | 8703(1) | 20(1)          |
| C(5)  | 6968(1)  | 1983(1) | 8947(1) | 16(1)          |
| C(6)  | 7481(1)  | 2091(1) | 7825(1) | 14(1)          |
| C(7)  | 9289(1)  | 3027(1) | 7918(1) | 16(1)          |
| C(8)  | 9826(1)  | 2568(1) | 6761(1) | 16(1)          |
| C(9)  | 8494(1)  | 2670(1) | 5860(1) | 14(1)          |
| C(10) | 8968(1)  | 2658(1) | 4800(1) | 15(1)          |
| C(11) | 10616(1) | 2450(1) | 4548(1) | 18(1)          |
| C(12) | 11052(1) | 2482(1) | 3540(1) | 20(1)          |
| C(13) | 9864(1)  | 2705(1) | 2720(1) | 20(1)          |
| C(14) | 8260(1)  | 2898(1) | 2930(1) | 19(1)          |
| C(15) | 7778(1)  | 2882(1) | 3969(1) | 15(1)          |
| C(16) | 6128(1)  | 3103(1) | 4201(1) | 17(1)          |
| C(17) | 5685(1)  | 3061(1) | 5197(1) | 16(1)          |
| C(18) | 6852(1)  | 2821(1) | 6034(1) | 14(1)          |
| C(19) | 6202(1)  | 4702(1) | 7756(1) | 16(1)          |
| C(20) | 7176(1)  | 3774(1) | 9872(1) | 21(1)          |
| C(21) | 8088(1)  | 893(2)  | 9386(1) | 23(1)          |



Table 3. Bond lengths [ $\text{\AA}$ ] and angles [ $^\circ$ ] for cdv56.

---

|                  |            |
|------------------|------------|
| N(1)-C(19)       | 1.1464(13) |
| C(1)-C(19)       | 1.4877(13) |
| C(1)-C(18)       | 1.5459(12) |
| C(1)-C(2)        | 1.5484(13) |
| C(1)-C(6)        | 1.5544(12) |
| C(2)-C(3)        | 1.5268(13) |
| C(3)-C(4)        | 1.5263(14) |
| C(4)-C(5)        | 1.5399(14) |
| C(5)-C(20)       | 1.5342(14) |
| C(5)-C(21)       | 1.5369(13) |
| C(5)-C(6)        | 1.5543(12) |
| C(6)-C(7)        | 1.5271(13) |
| C(7)-C(8)        | 1.5232(13) |
| C(8)-C(9)        | 1.5120(12) |
| C(9)-C(18)       | 1.3828(13) |
| C(9)-C(10)       | 1.4374(13) |
| C(10)-C(11)      | 1.4208(13) |
| C(10)-C(15)      | 1.4210(13) |
| C(11)-C(12)      | 1.3732(14) |
| C(12)-C(13)      | 1.4090(15) |
| C(13)-C(14)      | 1.3694(14) |
| C(14)-C(15)      | 1.4200(13) |
| C(15)-C(16)      | 1.4180(13) |
| C(16)-C(17)      | 1.3625(13) |
| C(17)-C(18)      | 1.4219(13) |
|                  |            |
| C(19)-C(1)-C(18) | 104.44(7)  |
| C(19)-C(1)-C(2)  | 107.95(7)  |
| C(18)-C(1)-C(2)  | 112.23(7)  |
| C(19)-C(1)-C(6)  | 112.47(7)  |
| C(18)-C(1)-C(6)  | 110.72(7)  |
| C(2)-C(1)-C(6)   | 108.99(7)  |
| C(3)-C(2)-C(1)   | 111.63(8)  |
| C(4)-C(3)-C(2)   | 111.57(8)  |

|                   |            |
|-------------------|------------|
| C(3)-C(4)-C(5)    | 113.98(8)  |
| C(20)-C(5)-C(21)  | 108.02(8)  |
| C(20)-C(5)-C(4)   | 110.41(8)  |
| C(21)-C(5)-C(4)   | 107.52(8)  |
| C(20)-C(5)-C(6)   | 113.33(8)  |
| C(21)-C(5)-C(6)   | 108.80(8)  |
| C(4)-C(5)-C(6)    | 108.59(7)  |
| C(7)-C(6)-C(5)    | 115.41(7)  |
| C(7)-C(6)-C(1)    | 108.53(7)  |
| C(5)-C(6)-C(1)    | 115.28(7)  |
| C(8)-C(7)-C(6)    | 110.29(8)  |
| C(9)-C(8)-C(7)    | 113.23(8)  |
| C(18)-C(9)-C(10)  | 119.12(8)  |
| C(18)-C(9)-C(8)   | 122.07(8)  |
| C(10)-C(9)-C(8)   | 118.79(8)  |
| C(11)-C(10)-C(15) | 117.81(9)  |
| C(11)-C(10)-C(9)  | 122.20(9)  |
| C(15)-C(10)-C(9)  | 119.98(8)  |
| C(12)-C(11)-C(10) | 121.17(9)  |
| C(11)-C(12)-C(13) | 120.62(9)  |
| C(14)-C(13)-C(12) | 119.86(9)  |
| C(13)-C(14)-C(15) | 120.70(9)  |
| C(16)-C(15)-C(14) | 121.18(9)  |
| C(16)-C(15)-C(10) | 118.99(9)  |
| C(14)-C(15)-C(10) | 119.82(9)  |
| C(17)-C(16)-C(15) | 120.26(9)  |
| C(16)-C(17)-C(18) | 121.56(9)  |
| C(9)-C(18)-C(17)  | 120.00(8)  |
| C(9)-C(18)-C(1)   | 122.01(8)  |
| C(17)-C(18)-C(1)  | 117.91(8)  |
| N(1)-C(19)-C(1)   | 175.50(10) |

---

Table 4. Anisotropic displacement parameters ( $\text{\AA}^2 \times 10^3$ ) for cdv56. The anisotropic displacement factor exponent takes the form:  $-2\pi^2[ h^2 a^{*2}U^{11} + \dots + 2 h k a^* b^* U^{12} ]$

|       | U <sup>11</sup> | U <sup>22</sup> | U <sup>33</sup> | U <sup>23</sup> | U <sup>13</sup> | U <sup>12</sup> |
|-------|-----------------|-----------------|-----------------|-----------------|-----------------|-----------------|
| N(1)  | 31(1)           | 20(1)           | 22(1)           | 8(1)            | 8(1)            | 9(1)            |
| C(1)  | 13(1)           | 15(1)           | 13(1)           | 4(1)            | 3(1)            | 4(1)            |
| C(2)  | 13(1)           | 20(1)           | 18(1)           | 7(1)            | 2(1)            | 2(1)            |
| C(3)  | 16(1)           | 23(1)           | 20(1)           | 9(1)            | 6(1)            | 2(1)            |
| C(4)  | 20(1)           | 21(1)           | 20(1)           | 10(1)           | 5(1)            | 2(1)            |
| C(5)  | 18(1)           | 19(1)           | 14(1)           | 7(1)            | 3(1)            | 4(1)            |
| C(6)  | 14(1)           | 15(1)           | 13(1)           | 5(1)            | 2(1)            | 4(1)            |
| C(7)  | 15(1)           | 20(1)           | 14(1)           | 6(1)            | 1(1)            | 3(1)            |
| C(8)  | 12(1)           | 21(1)           | 16(1)           | 7(1)            | 3(1)            | 5(1)            |
| C(9)  | 14(1)           | 13(1)           | 14(1)           | 4(1)            | 2(1)            | 3(1)            |
| C(10) | 16(1)           | 13(1)           | 15(1)           | 4(1)            | 3(1)            | 2(1)            |
| C(11) | 16(1)           | 20(1)           | 19(1)           | 6(1)            | 4(1)            | 4(1)            |
| C(12) | 19(1)           | 20(1)           | 22(1)           | 6(1)            | 9(1)            | 3(1)            |
| C(13) | 26(1)           | 19(1)           | 17(1)           | 6(1)            | 8(1)            | 2(1)            |
| C(14) | 23(1)           | 17(1)           | 15(1)           | 6(1)            | 3(1)            | 2(1)            |
| C(15) | 18(1)           | 13(1)           | 15(1)           | 4(1)            | 3(1)            | 2(1)            |
| C(16) | 17(1)           | 18(1)           | 16(1)           | 7(1)            | 0(1)            | 4(1)            |
| C(17) | 14(1)           | 17(1)           | 17(1)           | 6(1)            | 3(1)            | 4(1)            |
| C(18) | 15(1)           | 13(1)           | 13(1)           | 4(1)            | 2(1)            | 3(1)            |
| C(19) | 16(1)           | 20(1)           | 15(1)           | 8(1)            | 4(1)            | 4(1)            |
| C(20) | 25(1)           | 23(1)           | 14(1)           | 5(1)            | 4(1)            | 4(1)            |
| C(21) | 24(1)           | 28(1)           | 21(1)           | 14(1)           | 4(1)            | 9(1)            |

Table 5. Hydrogen coordinates ( $\times 10^4$ ) and isotropic displacement parameters ( $\text{\AA}^2 \times 10^3$ )  
for cdv56.

|        | x         | y        | z         | U(eq) |
|--------|-----------|----------|-----------|-------|
| H(2A)  | 3611(17)  | 2300(17) | 6554(11)  | 27(3) |
| H(2B)  | 4431(15)  | 584(16)  | 6445(10)  | 18(3) |
| H(3A)  | 3780(16)  | 2977(17) | 8537(11)  | 22(3) |
| H(3B)  | 2727(16)  | 975(16)  | 7872(10)  | 19(3) |
| H(4A)  | 5053(16)  | -240(17) | 8252(11)  | 23(3) |
| H(4B)  | 4733(17)  | 1026(18) | 9438(12)  | 30(3) |
| H(6)   | 7365(15)  | 835(16)  | 7305(10)  | 16(3) |
| H(7A)  | 9364(16)  | 4313(17) | 8239(10)  | 22(3) |
| H(7B)  | 10104(17) | 2710(17) | 8440(11)  | 26(3) |
| H(8A)  | 10911(17) | 3370(17) | 6808(11)  | 25(3) |
| H(8B)  | 10080(16) | 1358(17) | 6532(11)  | 23(3) |
| H(11)  | 11459(18) | 2273(18) | 5090(12)  | 29(3) |
| H(12)  | 12228(17) | 2335(17) | 3380(11)  | 26(3) |
| H(13)  | 10200(17) | 2714(18) | 2002(11)  | 28(3) |
| H(14)  | 7394(18)  | 3057(18) | 2358(12)  | 33(4) |
| H(16)  | 5311(18)  | 3281(18) | 3625(11)  | 30(3) |
| H(17)  | 4523(17)  | 3234(16) | 5337(11)  | 24(3) |
| H(20A) | 8343(18)  | 4440(18) | 10006(11) | 31(3) |
| H(20B) | 6942(17)  | 3585(18) | 10574(12) | 32(3) |
| H(20C) | 6359(18)  | 4520(19) | 9691(12)  | 32(3) |
| H(21A) | 8029(18)  | -290(19) | 8806(12)  | 33(4) |
| H(21B) | 7696(17)  | 683(18)  | 10058(12) | 32(4) |
| H(21C) | 9278(19)  | 1454(18) | 9612(12)  | 31(3) |

### X-ray Data Collection, Structure Solution and Refinement for *cdv64* (8g)

A colorless crystal of approximate dimensions 0.128 x 0.159 x 0.298 mm was mounted in a cryoloop and transferred to a Bruker SMART APEX II diffractometer. The APEX2<sup>1</sup> program package was used to determine the unit-cell parameters and for data collection (60 sec/frame scan time for a sphere of diffraction data). The raw frame data was processed using SAINT<sup>2</sup> and SADABS<sup>3</sup> to yield the reflection data file. Subsequent calculations were carried out using the SHELXTL<sup>4</sup> program. The diffraction symmetry was *2/m* and the systematic absences were consistent with the monoclinic space group *P*<sub>2</sub><sub>1</sub>/*c* that was later determined to be correct.

The structure was solved by dual space methods and refined on *F*<sup>2</sup> by full-matrix least-squares techniques. The analytical scattering factors<sup>5</sup> for neutral atoms were used throughout the analysis.

Hydrogen atoms were included using a riding model. There were three molecules of the formula-unit present and one-half molecule of dichloromethane solvent (1/6 molecule of solvent per formula-unit). The solvent atoms were included with site-occupancy-factors = 0.50.

Least-squares analysis yielded *w*R<sub>2</sub> = 0.1143 and Goof = 1.019 for 873 variables refined against 17282 data (0.75 Å), R<sub>1</sub> = 0.0467 for those 13089 data with *I* > 2.0σ(*I*).

#### References.

6. APEX2 Version 2014.11-0, Bruker AXS, Inc.; Madison, WI 2014.
7. SAINT Version 8.34a, Bruker AXS, Inc.; Madison, WI 2013.
8. Sheldrick, G. M. SADABS, Version 2014/5, Bruker AXS, Inc.; Madison, WI 2014.
9. Sheldrick, G. M. SHELXTL, Version 2014/7, Bruker AXS, Inc.; Madison, WI 2014
10. International Tables for Crystallography 1992, Vol. C., Dordrecht: Kluwer Academic Publishers.

---

#### Definitions:

$$wR_2 = [\Sigma[w(F_o^2 - F_c^2)^2] / \Sigma[w(F_o^2)^2]]^{1/2}$$

$$R_1 = \Sigma||F_o| - |F_c|| / \Sigma|F_o|$$

Goof = S =  $[\Sigma[w(F_o^2 - F_c^2)^2] / (n-p)]^{1/2}$  where *n* is the number of reflections and *p* is the total number of parameters refined.

The thermal ellipsoid plot is shown at the 50% probability level.

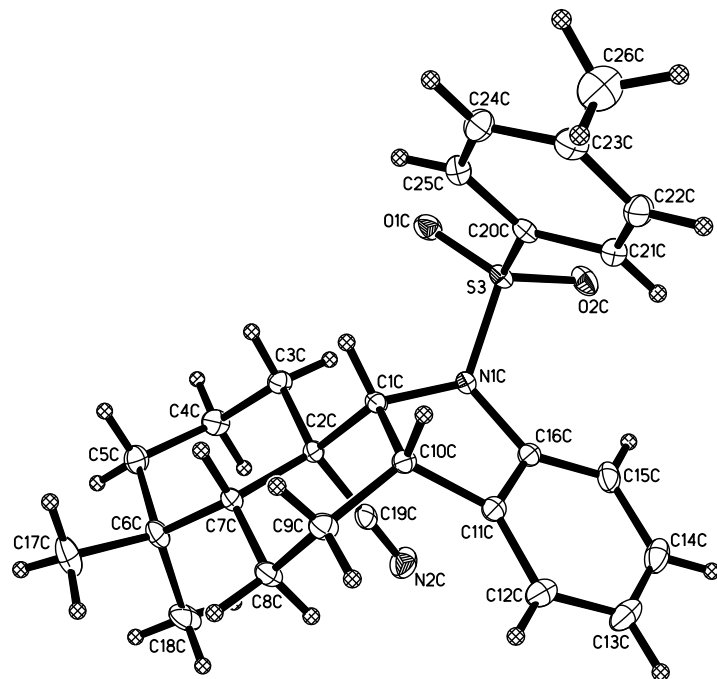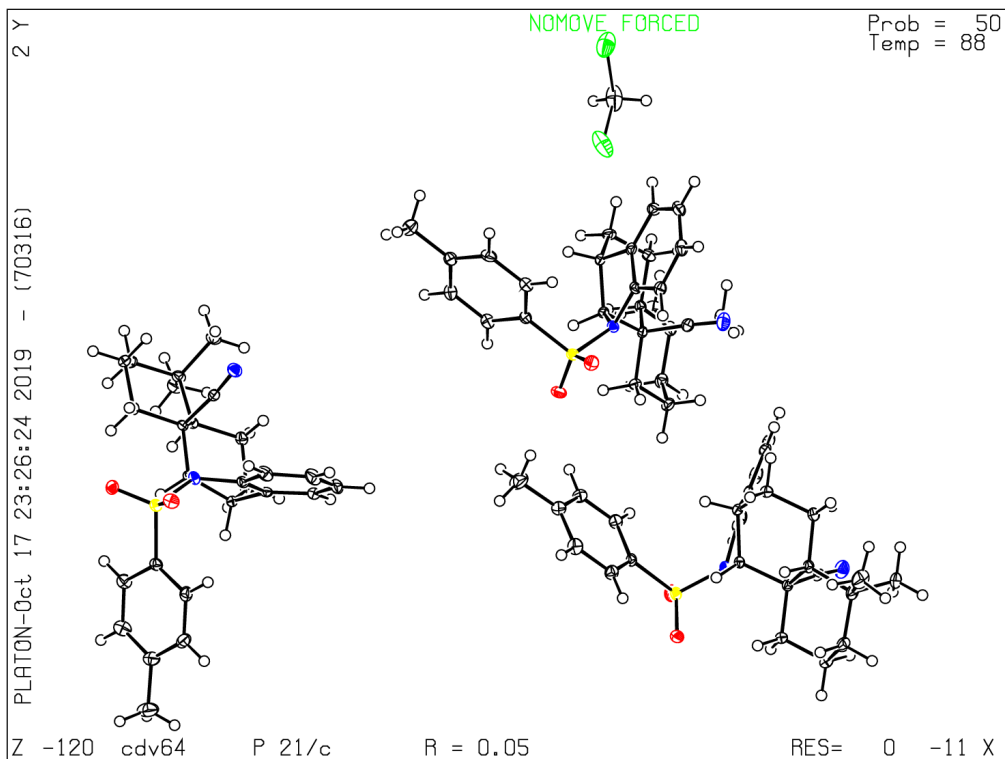

### Three molecules and one-half dichloromethane solvent

Table 1. Crystal data and structure refinement for cdv64.

|                                              |                                                              |                               |
|----------------------------------------------|--------------------------------------------------------------|-------------------------------|
| Identification code                          | cdv64 (Darius Vrubliauskas)                                  |                               |
| Empirical formula                            | $C_{26} H_{30} N_2 O_2 S \cdot 1/6(CH_2Cl_2)$                |                               |
| Formula weight                               | 448.73                                                       |                               |
| Temperature                                  | 88(2) K                                                      |                               |
| Wavelength                                   | 0.71073 Å                                                    |                               |
| Crystal system                               | Monoclinic                                                   |                               |
| Space group                                  | $P2_1/c$                                                     |                               |
| Unit cell dimensions                         | $a = 25.696(2)$ Å                                            | $\alpha = 90^\circ$ .         |
|                                              | $b = 24.774(2)$ Å                                            | $\beta = 97.6915(14)^\circ$ . |
|                                              | $c = 11.0354(9)$ Å                                           | $\gamma = 90^\circ$ .         |
| Volume                                       | $6961.8(10)$ Å <sup>3</sup>                                  |                               |
| Z                                            | 12                                                           |                               |
| Density (calculated)                         | 1.284 Mg/m <sup>3</sup>                                      |                               |
| Absorption coefficient                       | 0.204 mm <sup>-1</sup>                                       |                               |
| F(000)                                       | 2868                                                         |                               |
| Crystal color                                | colorless                                                    |                               |
| Crystal size                                 | 0.298 x 0.159 x 0.128 mm <sup>3</sup>                        |                               |
| Theta range for data collection              | 1.147 to 28.281°                                             |                               |
| Index ranges                                 | $-34 \leq h \leq 34, -33 \leq k \leq 33, -14 \leq l \leq 14$ |                               |
| Reflections collected                        | 96678                                                        |                               |
| Independent reflections                      | 17282 [R(int) = 0.0631]                                      |                               |
| Completeness to theta = 25.500°              | 100.0 %                                                      |                               |
| Absorption correction                        | Semi-empirical from equivalents                              |                               |
| Refinement method                            | Full-matrix least-squares on F <sup>2</sup>                  |                               |
| Data / restraints / parameters               | 17282 / 0 / 873                                              |                               |
| Goodness-of-fit on F <sup>2</sup>            | 1.019                                                        |                               |
| Final R indices [I > 2sigma(I) = 13089 data] | R1 = 0.0467, wR2 = 0.1035                                    |                               |
| R indices (all data, 0.75 Å)                 | R1 = 0.0700, wR2 = 0.1143                                    |                               |
| Largest diff. peak and hole                  | 0.406 and -0.428 e.Å <sup>-3</sup>                           |                               |

Table 2. Atomic coordinates ( $\times 10^4$ ) and equivalent isotropic displacement parameters ( $\text{\AA}^2 \times 10^3$ ) for cdv64.  $U(\text{eq})$  is defined as one third of the trace of the orthogonalized  $U^{ij}$  tensor.

|       | x        | y       | z        | $U(\text{eq})$ |
|-------|----------|---------|----------|----------------|
| S(1)  | -2066(1) | 2379(1) | 695(1)   | 12(1)          |
| O(1)  | -2420(1) | 2675(1) | -173(1)  | 18(1)          |
| O(2)  | -2162(1) | 2338(1) | 1943(1)  | 18(1)          |
| N(1)  | -2063(1) | 1753(1) | 192(1)   | 12(1)          |
| N(2)  | -2691(1) | 533(1)  | -355(1)  | 23(1)          |
| C(1)  | -1968(1) | 1658(1) | -1104(1) | 11(1)          |
| C(2)  | -2433(1) | 1318(1) | -1762(1) | 10(1)          |
| C(3)  | -2921(1) | 1682(1) | -2021(2) | 13(1)          |
| C(4)  | -3367(1) | 1396(1) | -2818(2) | 15(1)          |
| C(5)  | -3189(1) | 1222(1) | -4024(2) | 16(1)          |
| C(6)  | -2717(1) | 833(1)  | -3869(2) | 15(1)          |
| C(7)  | -2264(1) | 1085(1) | -2964(1) | 12(1)          |
| C(8)  | -1784(1) | 720(1)  | -2635(2) | 15(1)          |
| C(9)  | -1312(1) | 1053(1) | -2078(2) | 14(1)          |
| C(10) | -1422(1) | 1387(1) | -974(1)  | 11(1)          |
| C(11) | -1405(1) | 1104(1) | 246(2)   | 12(1)          |
| C(12) | -1107(1) | 675(1)  | 754(2)   | 15(1)          |
| C(13) | -1158(1) | 511(1)  | 1940(2)  | 18(1)          |
| C(14) | -1504(1) | 772(1)  | 2606(2)  | 17(1)          |
| C(15) | -1818(1) | 1194(1) | 2101(2)  | 14(1)          |
| C(16) | -1757(1) | 1352(1) | 925(2)   | 12(1)          |
| C(17) | -2524(1) | 782(1)  | -5126(2) | 22(1)          |
| C(18) | -2887(1) | 269(1)  | -3491(2) | 22(1)          |
| C(19) | -2564(1) | 873(1)  | -957(2)  | 14(1)          |
| C(20) | -1432(1) | 2647(1) | 709(2)   | 13(1)          |
| C(21) | -1042(1) | 2524(1) | 1676(2)  | 15(1)          |
| C(22) | -544(1)  | 2740(1) | 1684(2)  | 17(1)          |
| C(23) | -425(1)  | 3078(1) | 750(2)   | 17(1)          |
| C(24) | -823(1)  | 3197(1) | -206(2)  | 18(1)          |
| C(25) | -1324(1) | 2984(1) | -238(2)  | 16(1)          |
| C(26) | 116(1)   | 3313(1) | 778(2)   | 26(1)          |



|        |          |         |          |       |
|--------|----------|---------|----------|-------|
| S(2)   | -1394(1) | 7325(1) | -2582(1) | 12(1) |
| O(1B)  | -1007(1) | 7626(1) | -3117(1) | 17(1) |
| O(2B)  | -1342(1) | 7250(1) | -1281(1) | 17(1) |
| N(1B)  | -1392(1) | 6715(1) | -3169(1) | 12(1) |
| N(2B)  | -578(1)  | 5643(1) | -3288(1) | 18(1) |
| C(1B)  | -1446(1) | 6652(1) | -4532(1) | 10(1) |
| C(2B)  | -940(1)  | 6378(1) | -4895(1) | 10(1) |
| C(3B)  | -489(1)  | 6794(1) | -4814(2) | 13(1) |
| C(4B)  | -9(1)    | 6562(1) | -5301(2) | 16(1) |
| C(5B)  | -152(1)  | 6394(1) | -6631(2) | 16(1) |
| C(6B)  | -590(1)  | 5966(1) | -6835(2) | 14(1) |
| C(7B)  | -1071(1) | 6152(1) | -6220(1) | 11(1) |
| C(8B)  | -1510(1) | 5733(1) | -6248(2) | 14(1) |
| C(9B)  | -2021(1) | 6004(1) | -6023(2) | 14(1) |
| C(10B) | -1963(1) | 6326(1) | -4830(1) | 11(1) |
| C(11B) | -1979(1) | 6014(1) | -3656(2) | 12(1) |
| C(12B) | -2250(1) | 5549(1) | -3428(2) | 16(1) |
| C(13B) | -2222(1) | 5368(1) | -2227(2) | 20(1) |
| C(14B) | -1920(1) | 5636(1) | -1282(2) | 22(1) |
| C(15B) | -1630(1) | 6093(1) | -1503(2) | 19(1) |
| C(16B) | -1674(1) | 6277(1) | -2698(2) | 13(1) |
| C(17B) | -764(1)  | 5930(1) | -8222(2) | 21(1) |
| C(18B) | -379(1)  | 5412(1) | -6384(2) | 18(1) |
| C(19B) | -758(1)  | 5947(1) | -4002(2) | 12(1) |
| C(20B) | -2006(1) | 7640(1) | -3020(2) | 14(1) |
| C(21B) | -2414(1) | 7564(1) | -2325(2) | 17(1) |
| C(22B) | -2882(1) | 7843(1) | -2635(2) | 20(1) |
| C(23B) | -2946(1) | 8199(1) | -3623(2) | 19(1) |
| C(24B) | -2535(1) | 8262(1) | -4316(2) | 21(1) |
| C(25B) | -2064(1) | 7987(1) | -4022(2) | 18(1) |
| C(26B) | -3447(1) | 8518(1) | -3920(2) | 30(1) |
| S(3)   | -5374(1) | 2321(1) | -4274(1) | 13(1) |
| O(1C)  | -5754(1) | 2616(1) | -3701(1) | 17(1) |
| O(2C)  | -5440(1) | 2260(1) | -5579(1) | 19(1) |
| N(1C)  | -5363(1) | 1704(1) | -3710(1) | 12(1) |
| N(2C)  | -6030(1) | 523(1)  | -3504(1) | 23(1) |

|        |          |         |          |       |
|--------|----------|---------|----------|-------|
| C(1C)  | -5285(1) | 1638(1) | -2346(1) | 11(1) |
| C(2C)  | -5755(1) | 1309(1) | -1955(1) | 11(1) |
| C(3C)  | -6239(1) | 1683(1) | -2013(2) | 14(1) |
| C(4C)  | -6692(1) | 1403(1) | -1501(2) | 17(1) |
| C(5C)  | -6522(1) | 1234(1) | -177(2)  | 18(1) |
| C(6C)  | -6051(1) | 843(1)  | -17(2)   | 17(1) |
| C(7C)  | -5595(1) | 1090(1) | -633(1)  | 12(1) |
| C(8C)  | -5112(1) | 726(1)  | -613(2)  | 15(1) |
| C(9C)  | -4638(1) | 1058(1) | -870(2)  | 15(1) |
| C(10C) | -4740(1) | 1364(1) | -2079(2) | 12(1) |
| C(11C) | -4716(1) | 1053(1) | -3250(2) | 13(1) |
| C(12C) | -4420(1) | 607(1)  | -3489(2) | 18(1) |
| C(13C) | -4449(1) | 422(1)  | -4690(2) | 23(1) |
| C(14C) | -4776(1) | 673(1)  | -5621(2) | 23(1) |
| C(15C) | -5091(1) | 1109(1) | -5387(2) | 18(1) |
| C(16C) | -5050(1) | 1292(1) | -4192(2) | 13(1) |
| C(17C) | -5866(1) | 795(1)  | 1363(2)  | 27(1) |
| C(18C) | -6222(1) | 280(1)  | -502(2)  | 22(1) |
| C(19C) | -5895(1) | 859(1)  | -2826(2) | 14(1) |
| C(20C) | -4755(1) | 2620(1) | -3838(2) | 13(1) |
| C(21C) | -4339(1) | 2499(1) | -4487(2) | 16(1) |
| C(22C) | -3857(1) | 2747(1) | -4154(2) | 19(1) |
| C(23C) | -3783(1) | 3117(1) | -3197(2) | 19(1) |
| C(24C) | -4203(1) | 3228(1) | -2557(2) | 19(1) |
| C(25C) | -4689(1) | 2980(1) | -2867(2) | 16(1) |
| C(26C) | -3263(1) | 3396(1) | -2864(2) | 29(1) |
| C(27)  | -272(2)  | -102(2) | -5556(4) | 36(1) |
| Cl(1)  | -586(1)  | 368(1)  | -4642(1) | 46(1) |
| Cl(2)  | 351(1)   | -278(1) | -4844(1) | 44(1) |

---

Table 3. Bond lengths [ $\text{\AA}$ ] and angles [ $^\circ$ ] for cdv64.

---

|             |            |
|-------------|------------|
| S(1)-O(1)   | 1.4326(12) |
| S(1)-O(2)   | 1.4345(12) |
| S(1)-N(1)   | 1.6473(14) |
| S(1)-C(20)  | 1.7578(17) |
| N(1)-C(16)  | 1.445(2)   |
| N(1)-C(1)   | 1.501(2)   |
| N(2)-C(19)  | 1.147(2)   |
| C(1)-C(10)  | 1.545(2)   |
| C(1)-C(2)   | 1.558(2)   |
| C(2)-C(19)  | 1.483(2)   |
| C(2)-C(3)   | 1.541(2)   |
| C(2)-C(7)   | 1.560(2)   |
| C(3)-C(4)   | 1.523(2)   |
| C(4)-C(5)   | 1.526(2)   |
| C(5)-C(6)   | 1.540(2)   |
| C(6)-C(18)  | 1.537(2)   |
| C(6)-C(17)  | 1.539(2)   |
| C(6)-C(7)   | 1.560(2)   |
| C(7)-C(8)   | 1.532(2)   |
| C(8)-C(9)   | 1.526(2)   |
| C(9)-C(10)  | 1.530(2)   |
| C(10)-C(11) | 1.513(2)   |
| C(11)-C(12) | 1.385(2)   |
| C(11)-C(16) | 1.392(2)   |
| C(12)-C(13) | 1.394(2)   |
| C(13)-C(14) | 1.386(3)   |
| C(14)-C(15) | 1.392(2)   |
| C(15)-C(16) | 1.384(2)   |
| C(20)-C(25) | 1.394(2)   |
| C(20)-C(21) | 1.396(2)   |
| C(21)-C(22) | 1.386(2)   |
| C(22)-C(23) | 1.395(2)   |
| C(23)-C(24) | 1.400(2)   |
| C(23)-C(26) | 1.503(2)   |

|               |            |
|---------------|------------|
| C(24)-C(25)   | 1.385(2)   |
| S(2)-O(1B)    | 1.4316(12) |
| S(2)-O(2B)    | 1.4360(12) |
| S(2)-N(1B)    | 1.6438(14) |
| S(2)-C(20B)   | 1.7640(17) |
| N(1B)-C(16B)  | 1.440(2)   |
| N(1B)-C(1B)   | 1.500(2)   |
| N(2B)-C(19B)  | 1.141(2)   |
| C(1B)-C(10B)  | 1.553(2)   |
| C(1B)-C(2B)   | 1.563(2)   |
| C(2B)-C(19B)  | 1.487(2)   |
| C(2B)-C(3B)   | 1.545(2)   |
| C(2B)-C(7B)   | 1.560(2)   |
| C(3B)-C(4B)   | 1.523(2)   |
| C(4B)-C(5B)   | 1.523(2)   |
| C(5B)-C(6B)   | 1.540(2)   |
| C(6B)-C(18B)  | 1.536(2)   |
| C(6B)-C(17B)  | 1.539(2)   |
| C(6B)-C(7B)   | 1.555(2)   |
| C(7B)-C(8B)   | 1.532(2)   |
| C(8B)-C(9B)   | 1.524(2)   |
| C(9B)-C(10B)  | 1.530(2)   |
| C(10B)-C(11B) | 1.515(2)   |
| C(11B)-C(12B) | 1.385(2)   |
| C(11B)-C(16B) | 1.392(2)   |
| C(12B)-C(13B) | 1.392(2)   |
| C(13B)-C(14B) | 1.384(3)   |
| C(14B)-C(15B) | 1.394(3)   |
| C(15B)-C(16B) | 1.385(2)   |
| C(20B)-C(21B) | 1.393(2)   |
| C(20B)-C(25B) | 1.393(2)   |
| C(21B)-C(22B) | 1.389(2)   |
| C(22B)-C(23B) | 1.396(3)   |
| C(23B)-C(24B) | 1.393(3)   |
| C(23B)-C(26B) | 1.508(3)   |
| C(24B)-C(25B) | 1.388(2)   |

|               |            |
|---------------|------------|
| S(3)-O(1C)    | 1.4316(12) |
| S(3)-O(2C)    | 1.4356(12) |
| S(3)-N(1C)    | 1.6497(14) |
| S(3)-C(20C)   | 1.7623(17) |
| N(1C)-C(16C)  | 1.445(2)   |
| N(1C)-C(1C)   | 1.500(2)   |
| N(2C)-C(19C)  | 1.142(2)   |
| C(1C)-C(10C)  | 1.549(2)   |
| C(1C)-C(2C)   | 1.564(2)   |
| C(2C)-C(19C)  | 1.484(2)   |
| C(2C)-C(3C)   | 1.545(2)   |
| C(2C)-C(7C)   | 1.560(2)   |
| C(3C)-C(4C)   | 1.528(2)   |
| C(4C)-C(5C)   | 1.526(2)   |
| C(5C)-C(6C)   | 1.541(2)   |
| C(6C)-C(18C)  | 1.537(2)   |
| C(6C)-C(17C)  | 1.539(2)   |
| C(6C)-C(7C)   | 1.557(2)   |
| C(7C)-C(8C)   | 1.531(2)   |
| C(8C)-C(9C)   | 1.525(2)   |
| C(9C)-C(10C)  | 1.527(2)   |
| C(10C)-C(11C) | 1.513(2)   |
| C(11C)-C(12C) | 1.387(2)   |
| C(11C)-C(16C) | 1.388(2)   |
| C(12C)-C(13C) | 1.395(3)   |
| C(13C)-C(14C) | 1.384(3)   |
| C(14C)-C(15C) | 1.394(3)   |
| C(15C)-C(16C) | 1.384(2)   |
| C(20C)-C(25C) | 1.387(2)   |
| C(20C)-C(21C) | 1.398(2)   |
| C(21C)-C(22C) | 1.387(2)   |
| C(22C)-C(23C) | 1.393(2)   |
| C(23C)-C(24C) | 1.394(3)   |
| C(23C)-C(26C) | 1.506(3)   |
| C(24C)-C(25C) | 1.391(2)   |
| C(27)-Cl(2)   | 1.741(5)   |

|                  |            |
|------------------|------------|
| C(27)-Cl(1)      | 1.801(6)   |
| O(1)-S(1)-O(2)   | 120.22(7)  |
| O(1)-S(1)-N(1)   | 106.74(7)  |
| O(2)-S(1)-N(1)   | 105.47(7)  |
| O(1)-S(1)-C(20)  | 108.48(8)  |
| O(2)-S(1)-C(20)  | 107.21(8)  |
| N(1)-S(1)-C(20)  | 108.22(7)  |
| C(16)-N(1)-C(1)  | 106.29(12) |
| C(16)-N(1)-S(1)  | 119.00(11) |
| C(1)-N(1)-S(1)   | 118.53(10) |
| N(1)-C(1)-C(10)  | 103.89(12) |
| N(1)-C(1)-C(2)   | 108.51(12) |
| C(10)-C(1)-C(2)  | 115.99(13) |
| C(19)-C(2)-C(3)  | 107.50(13) |
| C(19)-C(2)-C(1)  | 110.12(13) |
| C(3)-C(2)-C(1)   | 108.92(13) |
| C(19)-C(2)-C(7)  | 110.22(13) |
| C(3)-C(2)-C(7)   | 111.80(13) |
| C(1)-C(2)-C(7)   | 108.27(12) |
| C(4)-C(3)-C(2)   | 111.47(13) |
| C(3)-C(4)-C(5)   | 110.10(13) |
| C(4)-C(5)-C(6)   | 113.85(14) |
| C(18)-C(6)-C(17) | 107.88(14) |
| C(18)-C(6)-C(5)  | 110.64(14) |
| C(17)-C(6)-C(5)  | 107.14(14) |
| C(18)-C(6)-C(7)  | 113.83(14) |
| C(17)-C(6)-C(7)  | 107.88(14) |
| C(5)-C(6)-C(7)   | 109.20(13) |
| C(8)-C(7)-C(6)   | 115.09(13) |
| C(8)-C(7)-C(2)   | 108.89(13) |
| C(6)-C(7)-C(2)   | 115.08(13) |
| C(9)-C(8)-C(7)   | 110.40(13) |
| C(8)-C(9)-C(10)  | 113.05(13) |
| C(11)-C(10)-C(9) | 118.21(14) |
| C(11)-C(10)-C(1) | 101.62(12) |

|                    |            |
|--------------------|------------|
| C(9)-C(10)-C(1)    | 115.02(13) |
| C(12)-C(11)-C(16)  | 119.05(15) |
| C(12)-C(11)-C(10)  | 131.55(15) |
| C(16)-C(11)-C(10)  | 109.39(14) |
| C(11)-C(12)-C(13)  | 119.10(16) |
| C(14)-C(13)-C(12)  | 120.69(16) |
| C(13)-C(14)-C(15)  | 121.14(16) |
| C(16)-C(15)-C(14)  | 117.06(16) |
| C(15)-C(16)-C(11)  | 122.92(15) |
| C(15)-C(16)-N(1)   | 126.70(15) |
| C(11)-C(16)-N(1)   | 110.21(14) |
| N(2)-C(19)-C(2)    | 176.70(18) |
| C(25)-C(20)-C(21)  | 120.58(16) |
| C(25)-C(20)-S(1)   | 119.87(13) |
| C(21)-C(20)-S(1)   | 119.55(13) |
| C(22)-C(21)-C(20)  | 119.25(16) |
| C(21)-C(22)-C(23)  | 121.41(16) |
| C(22)-C(23)-C(24)  | 118.18(16) |
| C(22)-C(23)-C(26)  | 120.82(16) |
| C(24)-C(23)-C(26)  | 121.00(16) |
| C(25)-C(24)-C(23)  | 121.48(16) |
| C(24)-C(25)-C(20)  | 119.11(16) |
| O(1B)-S(2)-O(2B)   | 120.21(7)  |
| O(1B)-S(2)-N(1B)   | 106.08(7)  |
| O(2B)-S(2)-N(1B)   | 105.69(7)  |
| O(1B)-S(2)-C(20B)  | 107.38(8)  |
| O(2B)-S(2)-C(20B)  | 106.96(8)  |
| N(1B)-S(2)-C(20B)  | 110.35(7)  |
| C(16B)-N(1B)-C(1B) | 107.40(12) |
| C(16B)-N(1B)-S(2)  | 121.45(11) |
| C(1B)-N(1B)-S(2)   | 119.18(10) |
| N(1B)-C(1B)-C(10B) | 103.23(12) |
| N(1B)-C(1B)-C(2B)  | 109.53(12) |
| C(10B)-C(1B)-C(2B) | 115.98(13) |
| C(19B)-C(2B)-C(3B) | 105.86(13) |
| C(19B)-C(2B)-C(7B) | 111.87(13) |

|                      |            |
|----------------------|------------|
| C(3B)-C(2B)-C(7B)    | 111.01(13) |
| C(19B)-C(2B)-C(1B)   | 109.91(13) |
| C(3B)-C(2B)-C(1B)    | 109.84(12) |
| C(7B)-C(2B)-C(1B)    | 108.32(12) |
| C(4B)-C(3B)-C(2B)    | 111.47(13) |
| C(5B)-C(4B)-C(3B)    | 109.92(14) |
| C(4B)-C(5B)-C(6B)    | 114.00(14) |
| C(18B)-C(6B)-C(17B)  | 108.26(14) |
| C(18B)-C(6B)-C(5B)   | 110.32(14) |
| C(17B)-C(6B)-C(5B)   | 107.15(14) |
| C(18B)-C(6B)-C(7B)   | 113.00(13) |
| C(17B)-C(6B)-C(7B)   | 108.01(13) |
| C(5B)-C(6B)-C(7B)    | 109.90(13) |
| C(8B)-C(7B)-C(6B)    | 114.66(13) |
| C(8B)-C(7B)-C(2B)    | 109.08(13) |
| C(6B)-C(7B)-C(2B)    | 115.58(13) |
| C(9B)-C(8B)-C(7B)    | 110.34(13) |
| C(8B)-C(9B)-C(10B)   | 112.56(13) |
| C(11B)-C(10B)-C(9B)  | 117.30(14) |
| C(11B)-C(10B)-C(1B)  | 101.81(12) |
| C(9B)-C(10B)-C(1B)   | 115.81(13) |
| C(12B)-C(11B)-C(16B) | 119.87(15) |
| C(12B)-C(11B)-C(10B) | 130.66(15) |
| C(16B)-C(11B)-C(10B) | 109.43(14) |
| C(11B)-C(12B)-C(13B) | 118.53(16) |
| C(14B)-C(13B)-C(12B) | 120.98(16) |
| C(13B)-C(14B)-C(15B) | 121.10(17) |
| C(16B)-C(15B)-C(14B) | 117.23(17) |
| C(15B)-C(16B)-C(11B) | 122.21(16) |
| C(15B)-C(16B)-N(1B)  | 127.72(15) |
| C(11B)-C(16B)-N(1B)  | 109.84(14) |
| N(2B)-C(19B)-C(2B)   | 173.79(17) |
| C(21B)-C(20B)-C(25B) | 120.79(16) |
| C(21B)-C(20B)-S(2)   | 119.85(13) |
| C(25B)-C(20B)-S(2)   | 119.25(13) |
| C(22B)-C(21B)-C(20B) | 119.14(16) |



|                      |            |
|----------------------|------------|
| C(21B)-C(22B)-C(23B) | 121.07(17) |
| C(24B)-C(23B)-C(22B) | 118.67(16) |
| C(24B)-C(23B)-C(26B) | 120.62(17) |
| C(22B)-C(23B)-C(26B) | 120.70(17) |
| C(25B)-C(24B)-C(23B) | 121.18(17) |
| C(24B)-C(25B)-C(20B) | 119.13(16) |
| O(1C)-S(3)-O(2C)     | 120.13(8)  |
| O(1C)-S(3)-N(1C)     | 106.48(7)  |
| O(2C)-S(3)-N(1C)     | 105.93(7)  |
| O(1C)-S(3)-C(20C)    | 108.02(8)  |
| O(2C)-S(3)-C(20C)    | 107.41(8)  |
| N(1C)-S(3)-C(20C)    | 108.42(7)  |
| C(16C)-N(1C)-C(1C)   | 106.67(12) |
| C(16C)-N(1C)-S(3)    | 119.94(11) |
| C(1C)-N(1C)-S(3)     | 118.28(10) |
| N(1C)-C(1C)-C(10C)   | 103.49(12) |
| N(1C)-C(1C)-C(2C)    | 109.28(12) |
| C(10C)-C(1C)-C(2C)   | 115.57(13) |
| C(19C)-C(2C)-C(3C)   | 107.44(13) |
| C(19C)-C(2C)-C(7C)   | 110.80(13) |
| C(3C)-C(2C)-C(7C)    | 110.94(13) |
| C(19C)-C(2C)-C(1C)   | 109.99(13) |
| C(3C)-C(2C)-C(1C)    | 108.86(13) |
| C(7C)-C(2C)-C(1C)    | 108.79(13) |
| C(4C)-C(3C)-C(2C)    | 111.19(13) |
| C(5C)-C(4C)-C(3C)    | 110.04(14) |
| C(4C)-C(5C)-C(6C)    | 113.76(14) |
| C(18C)-C(6C)-C(17C)  | 108.15(15) |
| C(18C)-C(6C)-C(5C)   | 110.31(14) |
| C(17C)-C(6C)-C(5C)   | 107.26(15) |
| C(18C)-C(6C)-C(7C)   | 113.70(14) |
| C(17C)-C(6C)-C(7C)   | 108.07(14) |
| C(5C)-C(6C)-C(7C)    | 109.13(13) |
| C(8C)-C(7C)-C(6C)    | 114.75(13) |
| C(8C)-C(7C)-C(2C)    | 109.27(13) |
| C(6C)-C(7C)-C(2C)    | 115.16(13) |

|                      |            |
|----------------------|------------|
| C(9C)-C(8C)-C(7C)    | 110.22(13) |
| C(8C)-C(9C)-C(10C)   | 112.50(13) |
| C(11C)-C(10C)-C(9C)  | 118.10(14) |
| C(11C)-C(10C)-C(1C)  | 101.55(13) |
| C(9C)-C(10C)-C(1C)   | 115.37(13) |
| C(12C)-C(11C)-C(16C) | 119.76(16) |
| C(12C)-C(11C)-C(10C) | 130.90(16) |
| C(16C)-C(11C)-C(10C) | 109.32(14) |
| C(11C)-C(12C)-C(13C) | 118.77(17) |
| C(14C)-C(13C)-C(12C) | 120.50(17) |
| C(13C)-C(14C)-C(15C) | 121.35(17) |
| C(16C)-C(15C)-C(14C) | 117.21(17) |
| C(15C)-C(16C)-C(11C) | 122.35(16) |
| C(15C)-C(16C)-N(1C)  | 127.35(16) |
| C(11C)-C(16C)-N(1C)  | 110.07(14) |
| N(2C)-C(19C)-C(2C)   | 176.35(18) |
| C(25C)-C(20C)-C(21C) | 120.69(15) |
| C(25C)-C(20C)-S(3)   | 119.63(13) |
| C(21C)-C(20C)-S(3)   | 119.67(13) |
| C(22C)-C(21C)-C(20C) | 119.15(16) |
| C(21C)-C(22C)-C(23C) | 121.21(16) |
| C(22C)-C(23C)-C(24C) | 118.53(16) |
| C(22C)-C(23C)-C(26C) | 120.86(17) |
| C(24C)-C(23C)-C(26C) | 120.61(17) |
| C(25C)-C(24C)-C(23C) | 121.28(16) |
| C(20C)-C(25C)-C(24C) | 119.12(16) |
| Cl(2)-C(27)-Cl(1)    | 111.2(3)   |

---

Table 4. Anisotropic displacement parameters ( $\text{\AA}^2 \times 10^3$ ) for cdv64. The anisotropic displacement factor exponent takes the form:  $-2\pi^2[ h^2 a^{*2}U^{11} + \dots + 2 h k a^* b^* U^{12} ]$

|       | U <sup>11</sup> | U <sup>22</sup> | U <sup>33</sup> | U <sup>23</sup> | U <sup>13</sup> | U <sup>12</sup> |
|-------|-----------------|-----------------|-----------------|-----------------|-----------------|-----------------|
| S(1)  | 13(1)           | 10(1)           | 15(1)           | -3(1)           | 2(1)            | 1(1)            |
| O(1)  | 15(1)           | 14(1)           | 23(1)           | -3(1)           | -2(1)           | 4(1)            |
| O(2)  | 20(1)           | 17(1)           | 17(1)           | -5(1)           | 7(1)            | -1(1)           |
| N(1)  | 12(1)           | 10(1)           | 12(1)           | -2(1)           | 1(1)            | 0(1)            |
| N(2)  | 22(1)           | 22(1)           | 23(1)           | 5(1)            | 1(1)            | -7(1)           |
| C(1)  | 10(1)           | 10(1)           | 12(1)           | -1(1)           | 2(1)            | -1(1)           |
| C(2)  | 10(1)           | 10(1)           | 11(1)           | 0(1)            | 2(1)            | -2(1)           |
| C(3)  | 10(1)           | 13(1)           | 15(1)           | -1(1)           | 3(1)            | 1(1)            |
| C(4)  | 11(1)           | 17(1)           | 17(1)           | 0(1)            | 1(1)            | -2(1)           |
| C(5)  | 15(1)           | 17(1)           | 15(1)           | 0(1)            | 0(1)            | -3(1)           |
| C(6)  | 17(1)           | 14(1)           | 13(1)           | -2(1)           | -1(1)           | -2(1)           |
| C(7)  | 14(1)           | 11(1)           | 11(1)           | -1(1)           | 3(1)            | 0(1)            |
| C(8)  | 18(1)           | 13(1)           | 14(1)           | -1(1)           | 3(1)            | 3(1)            |
| C(9)  | 13(1)           | 16(1)           | 15(1)           | 0(1)            | 4(1)            | 3(1)            |
| C(10) | 10(1)           | 11(1)           | 14(1)           | -1(1)           | 2(1)            | -2(1)           |
| C(11) | 11(1)           | 12(1)           | 13(1)           | -1(1)           | 0(1)            | -3(1)           |
| C(12) | 13(1)           | 13(1)           | 18(1)           | -2(1)           | 1(1)            | 1(1)            |
| C(13) | 20(1)           | 13(1)           | 19(1)           | 2(1)            | -2(1)           | 0(1)            |
| C(14) | 21(1)           | 16(1)           | 14(1)           | 2(1)            | 0(1)            | -4(1)           |
| C(15) | 15(1)           | 14(1)           | 13(1)           | -3(1)           | 1(1)            | -3(1)           |
| C(16) | 12(1)           | 9(1)            | 14(1)           | -1(1)           | -2(1)           | -1(1)           |
| C(17) | 25(1)           | 25(1)           | 15(1)           | -6(1)           | 1(1)            | 3(1)            |
| C(18) | 25(1)           | 15(1)           | 25(1)           | -5(1)           | -3(1)           | -6(1)           |
| C(19) | 13(1)           | 14(1)           | 14(1)           | -1(1)           | 0(1)            | -2(1)           |
| C(20) | 14(1)           | 10(1)           | 15(1)           | -4(1)           | 3(1)            | 0(1)            |
| C(21) | 18(1)           | 13(1)           | 14(1)           | 0(1)            | 1(1)            | 1(1)            |
| C(22) | 16(1)           | 15(1)           | 18(1)           | -2(1)           | -3(1)           | 4(1)            |
| C(23) | 16(1)           | 13(1)           | 22(1)           | -4(1)           | 2(1)            | 0(1)            |
| C(24) | 21(1)           | 16(1)           | 17(1)           | 2(1)            | 3(1)            | -3(1)           |
| C(25) | 19(1)           | 15(1)           | 14(1)           | 0(1)            | -1(1)           | -1(1)           |
| C(26) | 17(1)           | 26(1)           | 36(1)           | 2(1)            | 1(1)            | -3(1)           |

|        |       |       |       |       |       |       |
|--------|-------|-------|-------|-------|-------|-------|
| S(2)   | 14(1) | 10(1) | 12(1) | -4(1) | 2(1)  | 0(1)  |
| O(1B)  | 16(1) | 13(1) | 21(1) | -4(1) | 4(1)  | -3(1) |
| O(2B)  | 20(1) | 18(1) | 12(1) | -4(1) | -1(1) | 1(1)  |
| N(1B)  | 16(1) | 10(1) | 10(1) | -1(1) | 3(1)  | 0(1)  |
| N(2B)  | 19(1) | 16(1) | 18(1) | 3(1)  | 2(1)  | 3(1)  |
| C(1B)  | 13(1) | 9(1)  | 9(1)  | -1(1) | 2(1)  | 1(1)  |
| C(2B)  | 11(1) | 9(1)  | 11(1) | 1(1)  | 2(1)  | 1(1)  |
| C(3B)  | 12(1) | 12(1) | 15(1) | 1(1)  | 2(1)  | -2(1) |
| C(4B)  | 10(1) | 15(1) | 22(1) | 4(1)  | 2(1)  | 0(1)  |
| C(5B)  | 14(1) | 17(1) | 18(1) | 5(1)  | 7(1)  | 3(1)  |
| C(6B)  | 16(1) | 14(1) | 13(1) | 1(1)  | 6(1)  | 4(1)  |
| C(7B)  | 13(1) | 10(1) | 10(1) | 0(1)  | 2(1)  | 1(1)  |
| C(8B)  | 17(1) | 12(1) | 12(1) | -3(1) | 3(1)  | 0(1)  |
| C(9B)  | 13(1) | 15(1) | 14(1) | -2(1) | 0(1)  | -1(1) |
| C(10B) | 10(1) | 10(1) | 13(1) | 0(1)  | 2(1)  | 0(1)  |
| C(11B) | 11(1) | 12(1) | 15(1) | 1(1)  | 4(1)  | 3(1)  |
| C(12B) | 13(1) | 12(1) | 22(1) | 0(1)  | 4(1)  | 1(1)  |
| C(13B) | 22(1) | 13(1) | 27(1) | 6(1)  | 11(1) | 2(1)  |
| C(14B) | 31(1) | 19(1) | 19(1) | 7(1)  | 11(1) | 6(1)  |
| C(15B) | 25(1) | 16(1) | 15(1) | 1(1)  | 4(1)  | 4(1)  |
| C(16B) | 15(1) | 10(1) | 15(1) | 0(1)  | 6(1)  | 2(1)  |
| C(17B) | 25(1) | 24(1) | 14(1) | -1(1) | 8(1)  | 4(1)  |
| C(18B) | 20(1) | 16(1) | 22(1) | 1(1)  | 7(1)  | 5(1)  |
| C(19B) | 11(1) | 12(1) | 13(1) | -3(1) | 3(1)  | -1(1) |
| C(20B) | 14(1) | 11(1) | 14(1) | -4(1) | 1(1)  | 0(1)  |
| C(21B) | 18(1) | 15(1) | 19(1) | -1(1) | 3(1)  | -3(1) |
| C(22B) | 15(1) | 20(1) | 25(1) | -5(1) | 6(1)  | -3(1) |
| C(23B) | 16(1) | 20(1) | 21(1) | -8(1) | -3(1) | 1(1)  |
| C(24B) | 24(1) | 22(1) | 16(1) | -1(1) | -1(1) | 4(1)  |
| C(25B) | 20(1) | 18(1) | 15(1) | -2(1) | 4(1)  | 2(1)  |
| C(26B) | 18(1) | 34(1) | 37(1) | -5(1) | -2(1) | 7(1)  |
| S(3)   | 14(1) | 12(1) | 13(1) | 4(1)  | 2(1)  | -1(1) |
| O(1C)  | 16(1) | 16(1) | 21(1) | 5(1)  | 5(1)  | 3(1)  |
| O(2C)  | 22(1) | 21(1) | 13(1) | 4(1)  | 1(1)  | -3(1) |
| N(1C)  | 16(1) | 11(1) | 10(1) | 1(1)  | 4(1)  | 0(1)  |
| N(2C)  | 25(1) | 21(1) | 24(1) | -6(1) | 9(1)  | -6(1) |

|        |       |       |       |        |        |        |
|--------|-------|-------|-------|--------|--------|--------|
| C(1C)  | 12(1) | 10(1) | 11(1) | 2(1)   | 2(1)   | 0(1)   |
| C(2C)  | 12(1) | 10(1) | 12(1) | 0(1)   | 4(1)   | -1(1)  |
| C(3C)  | 12(1) | 13(1) | 17(1) | 1(1)   | 3(1)   | 1(1)   |
| C(4C)  | 12(1) | 18(1) | 23(1) | 2(1)   | 4(1)   | 0(1)   |
| C(5C)  | 17(1) | 19(1) | 20(1) | 1(1)   | 9(1)   | -2(1)  |
| C(6C)  | 17(1) | 18(1) | 16(1) | 4(1)   | 6(1)   | -3(1)  |
| C(7C)  | 14(1) | 12(1) | 12(1) | 2(1)   | 3(1)   | -1(1)  |
| C(8C)  | 16(1) | 14(1) | 17(1) | 4(1)   | 3(1)   | 0(1)   |
| C(9C)  | 12(1) | 15(1) | 19(1) | 3(1)   | 2(1)   | 2(1)   |
| C(10C) | 10(1) | 11(1) | 15(1) | 0(1)   | 4(1)   | -1(1)  |
| C(11C) | 11(1) | 11(1) | 17(1) | -2(1)  | 6(1)   | -4(1)  |
| C(12C) | 12(1) | 14(1) | 28(1) | -4(1)  | 7(1)   | -3(1)  |
| C(13C) | 17(1) | 16(1) | 38(1) | -11(1) | 14(1)  | -6(1)  |
| C(14C) | 25(1) | 22(1) | 24(1) | -10(1) | 13(1)  | -10(1) |
| C(15C) | 20(1) | 20(1) | 16(1) | -2(1)  | 8(1)   | -7(1)  |
| C(16C) | 13(1) | 10(1) | 18(1) | -1(1)  | 8(1)   | -3(1)  |
| C(17C) | 27(1) | 37(1) | 18(1) | 9(1)   | 9(1)   | -2(1)  |
| C(18C) | 20(1) | 17(1) | 29(1) | 7(1)   | 8(1)   | -3(1)  |
| C(19C) | 11(1) | 15(1) | 15(1) | 2(1)   | 5(1)   | -1(1)  |
| C(20C) | 13(1) | 12(1) | 13(1) | 4(1)   | 2(1)   | -1(1)  |
| C(21C) | 19(1) | 15(1) | 15(1) | -1(1)  | 5(1)   | 0(1)   |
| C(22C) | 16(1) | 18(1) | 23(1) | -1(1)  | 7(1)   | 1(1)   |
| C(23C) | 16(1) | 18(1) | 21(1) | 2(1)   | 1(1)   | 1(1)   |
| C(24C) | 22(1) | 19(1) | 14(1) | -4(1)  | 1(1)   | -2(1)  |
| C(25C) | 18(1) | 18(1) | 15(1) | 1(1)   | 5(1)   | -1(1)  |
| C(26C) | 17(1) | 33(1) | 36(1) | -7(1)  | 1(1)   | -4(1)  |
| C(27)  | 48(3) | 34(3) | 21(2) | 8(2)   | -10(2) | -17(2) |
| Cl(1)  | 70(1) | 23(1) | 41(1) | 4(1)   | -6(1)  | 0(1)   |
| Cl(2)  | 36(1) | 52(1) | 42(1) | 20(1)  | -10(1) | -15(1) |

---

Table 5. Hydrogen coordinates ( $\times 10^4$ ) and isotropic displacement parameters ( $\text{\AA}^2 \times 10^3$ ) for cdv64.

|        | x     | y    | z     | U(eq) |
|--------|-------|------|-------|-------|
| H(1A)  | -1953 | 2012 | -1530 | 13    |
| H(3A)  | -3040 | 1788 | -1237 | 15    |
| H(3B)  | -2827 | 2015 | -2438 | 15    |
| H(4A)  | -3672 | 1642 | -2984 | 18    |
| H(4B)  | -3478 | 1075 | -2383 | 18    |
| H(5A)  | -3093 | 1548 | -4465 | 19    |
| H(5B)  | -3486 | 1045 | -4535 | 19    |
| H(7A)  | -2136 | 1401 | -3403 | 14    |
| H(8A)  | -1864 | 442  | -2045 | 18    |
| H(8B)  | -1700 | 535  | -3380 | 18    |
| H(9A)  | -1207 | 1299 | -2709 | 17    |
| H(9B)  | -1014 | 807  | -1823 | 17    |
| H(10A) | -1155 | 1682 | -865  | 14    |
| H(12A) | -871  | 494  | 299   | 18    |
| H(13A) | -954  | 218  | 2296  | 21    |
| H(14A) | -1527 | 661  | 3421  | 21    |
| H(15A) | -2064 | 1367 | 2544  | 17    |
| H(17A) | -2813 | 655  | -5730 | 33    |
| H(17B) | -2234 | 523  | -5072 | 33    |
| H(17C) | -2404 | 1135 | -5376 | 33    |
| H(18A) | -3151 | 123  | -4130 | 34    |
| H(18B) | -3036 | 295  | -2721 | 34    |
| H(18C) | -2581 | 29   | -3381 | 34    |
| H(21A) | -1118 | 2295 | 2321  | 19    |
| H(22A) | -278  | 2655 | 2340  | 20    |
| H(24A) | -749  | 3428 | -848  | 21    |
| H(25A) | -1589 | 3066 | -896  | 19    |
| H(26A) | 127   | 3540 | 54    | 39    |
| H(26B) | 200   | 3533 | 1517  | 39    |
| H(26C) | 373   | 3021 | 783   | 39    |

|        |       |      |       |    |
|--------|-------|------|-------|----|
| H(1BA) | -1490 | 7015 | -4925 | 12 |
| H(3BA) | -610  | 7119 | -5292 | 16 |
| H(3BB) | -392  | 6904 | -3951 | 16 |
| H(4BA) | 274   | 6836 | -5237 | 19 |
| H(4BB) | 123   | 6245 | -4805 | 19 |
| H(5BA) | 166   | 6249 | -6934 | 19 |
| H(5BB) | -265  | 6718 | -7122 | 19 |
| H(7BA) | -1227 | 6461 | -6726 | 13 |
| H(8BA) | -1561 | 5550 | -7053 | 16 |
| H(8BB) | -1411 | 5456 | -5611 | 16 |
| H(9BA) | -2294 | 5724 | -5995 | 17 |
| H(9BB) | -2139 | 6248 | -6714 | 17 |
| H(10B) | -2259 | 6592 | -4899 | 13 |
| H(12B) | -2450 | 5358 | -4077 | 19 |
| H(13B) | -2414 | 5055 | -2054 | 24 |
| H(14B) | -1910 | 5507 | -469  | 27 |
| H(15B) | -1413 | 6271 | -862  | 22 |
| H(17D) | -922  | 6274 | -8519 | 31 |
| H(17E) | -1023 | 5641 | -8393 | 31 |
| H(17F) | -459  | 5853 | -8639 | 31 |
| H(18D) | -256  | 5430 | -5505 | 28 |
| H(18E) | -86   | 5309 | -6822 | 28 |
| H(18F) | -659  | 5142 | -6538 | 28 |
| H(21B) | -2373 | 7324 | -1647 | 21 |
| H(22B) | -3162 | 7790 | -2166 | 23 |
| H(24B) | -2577 | 8498 | -5001 | 25 |
| H(25B) | -1786 | 8035 | -4498 | 21 |
| H(26D) | -3716 | 8372 | -3461 | 46 |
| H(26E) | -3569 | 8494 | -4798 | 46 |
| H(26F) | -3381 | 8897 | -3693 | 46 |
| H(1CA) | -5271 | 2002 | -1949 | 13 |
| H(3CA) | -6142 | 2015 | -1537 | 16 |
| H(3CB) | -6353 | 1789 | -2872 | 16 |
| H(4CA) | -6996 | 1651 | -1540 | 21 |
| H(4CB) | -6803 | 1081 | -2001 | 21 |
| H(5CA) | -6822 | 1060 | 143   | 22 |

|        |       |      |       |    |
|--------|-------|------|-------|----|
| H(5CB) | -6428 | 1561 | 319   | 22 |
| H(7CA) | -5473 | 1412 | -127  | 15 |
| H(8CA) | -5035 | 551  | 197   | 18 |
| H(8CB) | -5184 | 440  | -1239 | 18 |
| H(9CA) | -4335 | 814  | -891  | 18 |
| H(9CB) | -4547 | 1319 | -197  | 18 |
| H(10C) | -4471 | 1657 | -2047 | 14 |
| H(12C) | -4201 | 431  | -2847 | 21 |
| H(13C) | -4243 | 121  | -4871 | 27 |
| H(14C) | -4786 | 546  | -6436 | 27 |
| H(15C) | -5324 | 1274 | -6021 | 22 |
| H(17G) | -5732 | 1145 | 1681  | 40 |
| H(17H) | -5585 | 525  | 1504  | 40 |
| H(17I) | -6161 | 685  | 1784  | 40 |
| H(18G) | -5916 | 41   | -439  | 32 |
| H(18H) | -6379 | 308  | -1359 | 32 |
| H(18I) | -6481 | 132  | -16   | 32 |
| H(21C) | -4385 | 2251 | -5149 | 19 |
| H(22C) | -3571 | 2662 | -4586 | 23 |
| H(24C) | -4157 | 3477 | -1897 | 23 |
| H(25C) | -4971 | 3057 | -2420 | 20 |
| H(26G) | -3318 | 3745 | -2486 | 43 |
| H(26H) | -3097 | 3452 | -3603 | 43 |
| H(26I) | -3034 | 3171 | -2286 | 43 |
| H(27A) | -490  | -431 | -5696 | 43 |
| H(27B) | -242  | 63   | -6362 | 43 |

---



Table 6. Torsion angles [ $^{\circ}$ ] for cdv64.

---

|                       |             |
|-----------------------|-------------|
| O(1)-S(1)-N(1)-C(16)  | -176.85(12) |
| O(2)-S(1)-N(1)-C(16)  | -47.90(13)  |
| C(20)-S(1)-N(1)-C(16) | 66.57(13)   |
| O(1)-S(1)-N(1)-C(1)   | 51.35(13)   |
| O(2)-S(1)-N(1)-C(1)   | -179.71(11) |
| C(20)-S(1)-N(1)-C(1)  | -65.23(13)  |
| C(16)-N(1)-C(1)-C(10) | -26.01(15)  |
| S(1)-N(1)-C(1)-C(10)  | 111.21(12)  |
| C(16)-N(1)-C(1)-C(2)  | 97.97(14)   |
| S(1)-N(1)-C(1)-C(2)   | -124.82(12) |
| N(1)-C(1)-C(2)-C(19)  | -43.81(17)  |
| C(10)-C(1)-C(2)-C(19) | 72.61(17)   |
| N(1)-C(1)-C(2)-C(3)   | 73.84(15)   |
| C(10)-C(1)-C(2)-C(3)  | -169.74(13) |
| N(1)-C(1)-C(2)-C(7)   | -164.39(12) |
| C(10)-C(1)-C(2)-C(7)  | -47.97(17)  |
| C(19)-C(2)-C(3)-C(4)  | -68.57(17)  |
| C(1)-C(2)-C(3)-C(4)   | 172.13(13)  |
| C(7)-C(2)-C(3)-C(4)   | 52.52(17)   |
| C(2)-C(3)-C(4)-C(5)   | -58.08(18)  |
| C(3)-C(4)-C(5)-C(6)   | 59.87(18)   |
| C(4)-C(5)-C(6)-C(18)  | 72.91(18)   |
| C(4)-C(5)-C(6)-C(17)  | -169.73(14) |
| C(4)-C(5)-C(6)-C(7)   | -53.14(18)  |
| C(18)-C(6)-C(7)-C(8)  | 50.9(2)     |
| C(17)-C(6)-C(7)-C(8)  | -68.83(18)  |
| C(5)-C(6)-C(7)-C(8)   | 175.05(14)  |
| C(18)-C(6)-C(7)-C(2)  | -77.02(18)  |
| C(17)-C(6)-C(7)-C(2)  | 163.30(14)  |
| C(5)-C(6)-C(7)-C(2)   | 47.18(18)   |
| C(19)-C(2)-C(7)-C(8)  | -59.50(17)  |
| C(3)-C(2)-C(7)-C(8)   | -179.00(13) |
| C(1)-C(2)-C(7)-C(8)   | 61.01(16)   |
| C(19)-C(2)-C(7)-C(6)  | 71.42(17)   |

|                         |             |
|-------------------------|-------------|
| C(3)-C(2)-C(7)-C(6)     | -48.08(18)  |
| C(1)-C(2)-C(7)-C(6)     | -168.07(13) |
| C(6)-C(7)-C(8)-C(9)     | 162.98(14)  |
| C(2)-C(7)-C(8)-C(9)     | -66.11(17)  |
| C(7)-C(8)-C(9)-C(10)    | 54.96(18)   |
| C(8)-C(9)-C(10)-C(11)   | 79.42(18)   |
| C(8)-C(9)-C(10)-C(1)    | -40.75(19)  |
| N(1)-C(1)-C(10)-C(11)   | 28.59(15)   |
| C(2)-C(1)-C(10)-C(11)   | -90.39(15)  |
| N(1)-C(1)-C(10)-C(9)    | 157.53(13)  |
| C(2)-C(1)-C(10)-C(9)    | 38.56(19)   |
| C(9)-C(10)-C(11)-C(12)  | 32.2(2)     |
| C(1)-C(10)-C(11)-C(12)  | 159.04(17)  |
| C(9)-C(10)-C(11)-C(16)  | -149.03(14) |
| C(1)-C(10)-C(11)-C(16)  | -22.14(16)  |
| C(16)-C(11)-C(12)-C(13) | -1.5(2)     |
| C(10)-C(11)-C(12)-C(13) | 177.18(16)  |
| C(11)-C(12)-C(13)-C(14) | 0.2(3)      |
| C(12)-C(13)-C(14)-C(15) | 1.6(3)      |
| C(13)-C(14)-C(15)-C(16) | -2.0(2)     |
| C(14)-C(15)-C(16)-C(11) | 0.7(2)      |
| C(14)-C(15)-C(16)-N(1)  | 175.48(15)  |
| C(12)-C(11)-C(16)-C(15) | 1.1(2)      |
| C(10)-C(11)-C(16)-C(15) | -177.90(15) |
| C(12)-C(11)-C(16)-N(1)  | -174.46(14) |
| C(10)-C(11)-C(16)-N(1)  | 6.56(18)    |
| C(1)-N(1)-C(16)-C(15)   | -162.62(15) |
| S(1)-N(1)-C(16)-C(15)   | 60.4(2)     |
| C(1)-N(1)-C(16)-C(11)   | 12.71(17)   |
| S(1)-N(1)-C(16)-C(11)   | -124.26(13) |
| O(1)-S(1)-C(20)-C(25)   | -15.38(15)  |
| O(2)-S(1)-C(20)-C(25)   | -146.61(13) |
| N(1)-S(1)-C(20)-C(25)   | 100.07(14)  |
| O(1)-S(1)-C(20)-C(21)   | 164.15(13)  |
| O(2)-S(1)-C(20)-C(21)   | 32.92(15)   |
| N(1)-S(1)-C(20)-C(21)   | -80.39(14)  |

|                           |             |
|---------------------------|-------------|
| C(25)-C(20)-C(21)-C(22)   | -0.1(2)     |
| S(1)-C(20)-C(21)-C(22)    | -179.67(13) |
| C(20)-C(21)-C(22)-C(23)   | 0.3(3)      |
| C(21)-C(22)-C(23)-C(24)   | -0.1(3)     |
| C(21)-C(22)-C(23)-C(26)   | 179.36(17)  |
| C(22)-C(23)-C(24)-C(25)   | -0.3(3)     |
| C(26)-C(23)-C(24)-C(25)   | -179.69(17) |
| C(23)-C(24)-C(25)-C(20)   | 0.4(3)      |
| C(21)-C(20)-C(25)-C(24)   | -0.2(2)     |
| S(1)-C(20)-C(25)-C(24)    | 179.35(13)  |
| O(1B)-S(2)-N(1B)-C(16B)   | 170.11(12)  |
| O(2B)-S(2)-N(1B)-C(16B)   | 41.42(14)   |
| C(20B)-S(2)-N(1B)-C(16B)  | -73.88(14)  |
| O(1B)-S(2)-N(1B)-C(1B)    | -51.89(13)  |
| O(2B)-S(2)-N(1B)-C(1B)    | 179.43(11)  |
| C(20B)-S(2)-N(1B)-C(1B)   | 64.12(13)   |
| C(16B)-N(1B)-C(1B)-C(10B) | 25.09(15)   |
| S(2)-N(1B)-C(1B)-C(10B)   | -118.17(12) |
| C(16B)-N(1B)-C(1B)-C(2B)  | -99.03(14)  |
| S(2)-N(1B)-C(1B)-C(2B)    | 117.71(12)  |
| N(1B)-C(1B)-C(2B)-C(19B)  | 39.76(16)   |
| C(10B)-C(1B)-C(2B)-C(19B) | -76.54(16)  |
| N(1B)-C(1B)-C(2B)-C(3B)   | -76.33(15)  |
| C(10B)-C(1B)-C(2B)-C(3B)  | 167.37(13)  |
| N(1B)-C(1B)-C(2B)-C(7B)   | 162.27(12)  |
| C(10B)-C(1B)-C(2B)-C(7B)  | 45.97(17)   |
| C(19B)-C(2B)-C(3B)-C(4B)  | 67.97(16)   |
| C(7B)-C(2B)-C(3B)-C(4B)   | -53.64(17)  |
| C(1B)-C(2B)-C(3B)-C(4B)   | -173.41(13) |
| C(2B)-C(3B)-C(4B)-C(5B)   | 59.40(17)   |
| C(3B)-C(4B)-C(5B)-C(6B)   | -59.26(18)  |
| C(4B)-C(5B)-C(6B)-C(18B)  | -73.88(18)  |
| C(4B)-C(5B)-C(6B)-C(17B)  | 168.48(14)  |
| C(4B)-C(5B)-C(6B)-C(7B)   | 51.37(18)   |
| C(18B)-C(6B)-C(7B)-C(8B)  | -50.25(19)  |
| C(17B)-C(6B)-C(7B)-C(8B)  | 69.47(17)   |

|                             |             |
|-----------------------------|-------------|
| C(5B)-C(6B)-C(7B)-C(8B)     | -173.95(13) |
| C(18B)-C(6B)-C(7B)-C(2B)    | 77.94(18)   |
| C(17B)-C(6B)-C(7B)-C(2B)    | -162.33(14) |
| C(5B)-C(6B)-C(7B)-C(2B)     | -45.75(18)  |
| C(19B)-C(2B)-C(7B)-C(8B)    | 60.65(17)   |
| C(3B)-C(2B)-C(7B)-C(8B)     | 178.66(13)  |
| C(1B)-C(2B)-C(7B)-C(8B)     | -60.66(16)  |
| C(19B)-C(2B)-C(7B)-C(6B)    | -70.26(17)  |
| C(3B)-C(2B)-C(7B)-C(6B)     | 47.75(18)   |
| C(1B)-C(2B)-C(7B)-C(6B)     | 168.43(13)  |
| C(6B)-C(7B)-C(8B)-C(9B)     | -161.37(13) |
| C(2B)-C(7B)-C(8B)-C(9B)     | 67.23(16)   |
| C(7B)-C(8B)-C(9B)-C(10B)    | -55.48(18)  |
| C(8B)-C(9B)-C(10B)-C(11B)   | -80.28(18)  |
| C(8B)-C(9B)-C(10B)-C(1B)    | 40.07(19)   |
| N(1B)-C(1B)-C(10B)-C(11B)   | -28.01(15)  |
| C(2B)-C(1B)-C(10B)-C(11B)   | 91.76(15)   |
| N(1B)-C(1B)-C(10B)-C(9B)    | -156.44(13) |
| C(2B)-C(1B)-C(10B)-C(9B)    | -36.67(19)  |
| C(9B)-C(10B)-C(11B)-C(12B)  | -32.2(2)    |
| C(1B)-C(10B)-C(11B)-C(12B)  | -159.71(17) |
| C(9B)-C(10B)-C(11B)-C(16B)  | 149.95(14)  |
| C(1B)-C(10B)-C(11B)-C(16B)  | 22.48(16)   |
| C(16B)-C(11B)-C(12B)-C(13B) | 2.2(2)      |
| C(10B)-C(11B)-C(12B)-C(13B) | -175.40(16) |
| C(11B)-C(12B)-C(13B)-C(14B) | -1.7(3)     |
| C(12B)-C(13B)-C(14B)-C(15B) | -0.6(3)     |
| C(13B)-C(14B)-C(15B)-C(16B) | 2.3(3)      |
| C(14B)-C(15B)-C(16B)-C(11B) | -1.8(3)     |
| C(14B)-C(15B)-C(16B)-N(1B)  | -175.71(16) |
| C(12B)-C(11B)-C(16B)-C(15B) | -0.5(2)     |
| C(10B)-C(11B)-C(16B)-C(15B) | 177.64(15)  |
| C(12B)-C(11B)-C(16B)-N(1B)  | 174.42(14)  |
| C(10B)-C(11B)-C(16B)-N(1B)  | -7.50(18)   |
| C(1B)-N(1B)-C(16B)-C(15B)   | 162.83(16)  |
| S(2)-N(1B)-C(16B)-C(15B)    | -54.9(2)    |

|                             |             |
|-----------------------------|-------------|
| C(1B)-N(1B)-C(16B)-C(11B)   | -11.68(17)  |
| S(2)-N(1B)-C(16B)-C(11B)    | 130.57(13)  |
| O(1B)-S(2)-C(20B)-C(21B)    | -157.48(13) |
| O(2B)-S(2)-C(20B)-C(21B)    | -27.19(16)  |
| N(1B)-S(2)-C(20B)-C(21B)    | 87.32(14)   |
| O(1B)-S(2)-C(20B)-C(25B)    | 18.84(15)   |
| O(2B)-S(2)-C(20B)-C(25B)    | 149.14(13)  |
| N(1B)-S(2)-C(20B)-C(25B)    | -96.35(14)  |
| C(25B)-C(20B)-C(21B)-C(22B) | -0.5(3)     |
| S(2)-C(20B)-C(21B)-C(22B)   | 175.73(13)  |
| C(20B)-C(21B)-C(22B)-C(23B) | -0.4(3)     |
| C(21B)-C(22B)-C(23B)-C(24B) | 1.3(3)      |
| C(21B)-C(22B)-C(23B)-C(26B) | -177.33(17) |
| C(22B)-C(23B)-C(24B)-C(25B) | -1.3(3)     |
| C(26B)-C(23B)-C(24B)-C(25B) | 177.35(17)  |
| C(23B)-C(24B)-C(25B)-C(20B) | 0.4(3)      |
| C(21B)-C(20B)-C(25B)-C(24B) | 0.6(3)      |
| S(2)-C(20B)-C(25B)-C(24B)   | -175.73(13) |
| O(1C)-S(3)-N(1C)-C(16C)     | 174.33(12)  |
| O(2C)-S(3)-N(1C)-C(16C)     | 45.36(14)   |
| C(20C)-S(3)-N(1C)-C(16C)    | -69.66(14)  |
| O(1C)-S(3)-N(1C)-C(1C)      | -52.38(13)  |
| O(2C)-S(3)-N(1C)-C(1C)      | 178.65(11)  |
| C(20C)-S(3)-N(1C)-C(1C)     | 63.63(13)   |
| C(16C)-N(1C)-C(1C)-C(10C)   | 25.64(15)   |
| S(3)-N(1C)-C(1C)-C(10C)     | -113.18(12) |
| C(16C)-N(1C)-C(1C)-C(2C)    | -98.02(14)  |
| S(3)-N(1C)-C(1C)-C(2C)      | 123.16(12)  |
| N(1C)-C(1C)-C(2C)-C(19C)    | 41.14(17)   |
| C(10C)-C(1C)-C(2C)-C(19C)   | -75.04(17)  |
| N(1C)-C(1C)-C(2C)-C(3C)     | -76.32(15)  |
| C(10C)-C(1C)-C(2C)-C(3C)    | 167.49(13)  |
| N(1C)-C(1C)-C(2C)-C(7C)     | 162.67(12)  |
| C(10C)-C(1C)-C(2C)-C(7C)    | 46.48(17)   |
| C(19C)-C(2C)-C(3C)-C(4C)    | 67.46(17)   |
| C(7C)-C(2C)-C(3C)-C(4C)     | -53.79(18)  |

|                             |             |
|-----------------------------|-------------|
| C(1C)-C(2C)-C(3C)-C(4C)     | -173.47(13) |
| C(2C)-C(3C)-C(4C)-C(5C)     | 58.75(18)   |
| C(3C)-C(4C)-C(5C)-C(6C)     | -59.60(19)  |
| C(4C)-C(5C)-C(6C)-C(18C)    | -72.60(18)  |
| C(4C)-C(5C)-C(6C)-C(17C)    | 169.83(15)  |
| C(4C)-C(5C)-C(6C)-C(7C)     | 52.99(19)   |
| C(18C)-C(6C)-C(7C)-C(8C)    | -52.71(19)  |
| C(17C)-C(6C)-C(7C)-C(8C)    | 67.35(19)   |
| C(5C)-C(6C)-C(7C)-C(8C)     | -176.32(14) |
| C(18C)-C(6C)-C(7C)-C(2C)    | 75.45(18)   |
| C(17C)-C(6C)-C(7C)-C(2C)    | -164.49(14) |
| C(5C)-C(6C)-C(7C)-C(2C)     | -48.16(19)  |
| C(19C)-C(2C)-C(7C)-C(8C)    | 61.26(17)   |
| C(3C)-C(2C)-C(7C)-C(8C)     | -179.49(13) |
| C(1C)-C(2C)-C(7C)-C(8C)     | -59.77(16)  |
| C(19C)-C(2C)-C(7C)-C(6C)    | -69.59(17)  |
| C(3C)-C(2C)-C(7C)-C(6C)     | 49.66(18)   |
| C(1C)-C(2C)-C(7C)-C(6C)     | 169.38(13)  |
| C(6C)-C(7C)-C(8C)-C(9C)     | -162.77(14) |
| C(2C)-C(7C)-C(8C)-C(9C)     | 66.16(17)   |
| C(7C)-C(8C)-C(9C)-C(10C)    | -56.31(18)  |
| C(8C)-C(9C)-C(10C)-C(11C)   | -77.92(18)  |
| C(8C)-C(9C)-C(10C)-C(1C)    | 42.38(19)   |
| N(1C)-C(1C)-C(10C)-C(11C)   | -29.10(15)  |
| C(2C)-C(1C)-C(10C)-C(11C)   | 90.32(15)   |
| N(1C)-C(1C)-C(10C)-C(9C)    | -158.07(13) |
| C(2C)-C(1C)-C(10C)-C(9C)    | -38.65(19)  |
| C(9C)-C(10C)-C(11C)-C(12C)  | -30.9(2)    |
| C(1C)-C(10C)-C(11C)-C(12C)  | -158.09(17) |
| C(9C)-C(10C)-C(11C)-C(16C)  | 150.79(14)  |
| C(1C)-C(10C)-C(11C)-C(16C)  | 23.57(16)   |
| C(16C)-C(11C)-C(12C)-C(13C) | 2.6(2)      |
| C(10C)-C(11C)-C(12C)-C(13C) | -175.57(16) |
| C(11C)-C(12C)-C(13C)-C(14C) | -1.2(3)     |
| C(12C)-C(13C)-C(14C)-C(15C) | -1.2(3)     |
| C(13C)-C(14C)-C(15C)-C(16C) | 2.1(3)      |

|                             |             |
|-----------------------------|-------------|
| C(14C)-C(15C)-C(16C)-C(11C) | -0.6(2)     |
| C(14C)-C(15C)-C(16C)-N(1C)  | -174.61(15) |
| C(12C)-C(11C)-C(16C)-C(15C) | -1.7(2)     |
| C(10C)-C(11C)-C(16C)-C(15C) | 176.82(15)  |
| C(12C)-C(11C)-C(16C)-N(1C)  | 173.17(14)  |
| C(10C)-C(11C)-C(16C)-N(1C)  | -8.27(18)   |
| C(1C)-N(1C)-C(16C)-C(15C)   | 163.09(16)  |
| S(3)-N(1C)-C(16C)-C(15C)    | -58.9(2)    |
| C(1C)-N(1C)-C(16C)-C(11C)   | -11.50(17)  |
| S(3)-N(1C)-C(16C)-C(11C)    | 126.50(13)  |
| O(1C)-S(3)-C(20C)-C(25C)    | 14.21(16)   |
| O(2C)-S(3)-C(20C)-C(25C)    | 145.15(13)  |
| N(1C)-S(3)-C(20C)-C(25C)    | -100.80(14) |
| O(1C)-S(3)-C(20C)-C(21C)    | -164.59(13) |
| O(2C)-S(3)-C(20C)-C(21C)    | -33.65(16)  |
| N(1C)-S(3)-C(20C)-C(21C)    | 80.40(15)   |
| C(25C)-C(20C)-C(21C)-C(22C) | -0.3(3)     |
| S(3)-C(20C)-C(21C)-C(22C)   | 178.47(13)  |
| C(20C)-C(21C)-C(22C)-C(23C) | -0.8(3)     |
| C(21C)-C(22C)-C(23C)-C(24C) | 1.3(3)      |
| C(21C)-C(22C)-C(23C)-C(26C) | -178.26(17) |
| C(22C)-C(23C)-C(24C)-C(25C) | -0.7(3)     |
| C(26C)-C(23C)-C(24C)-C(25C) | 178.91(17)  |
| C(21C)-C(20C)-C(25C)-C(24C) | 1.0(3)      |
| S(3)-C(20C)-C(25C)-C(24C)   | -177.83(13) |
| C(23C)-C(24C)-C(25C)-C(20C) | -0.5(3)     |

---

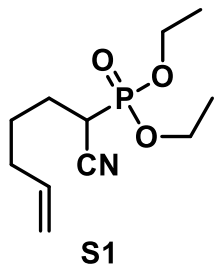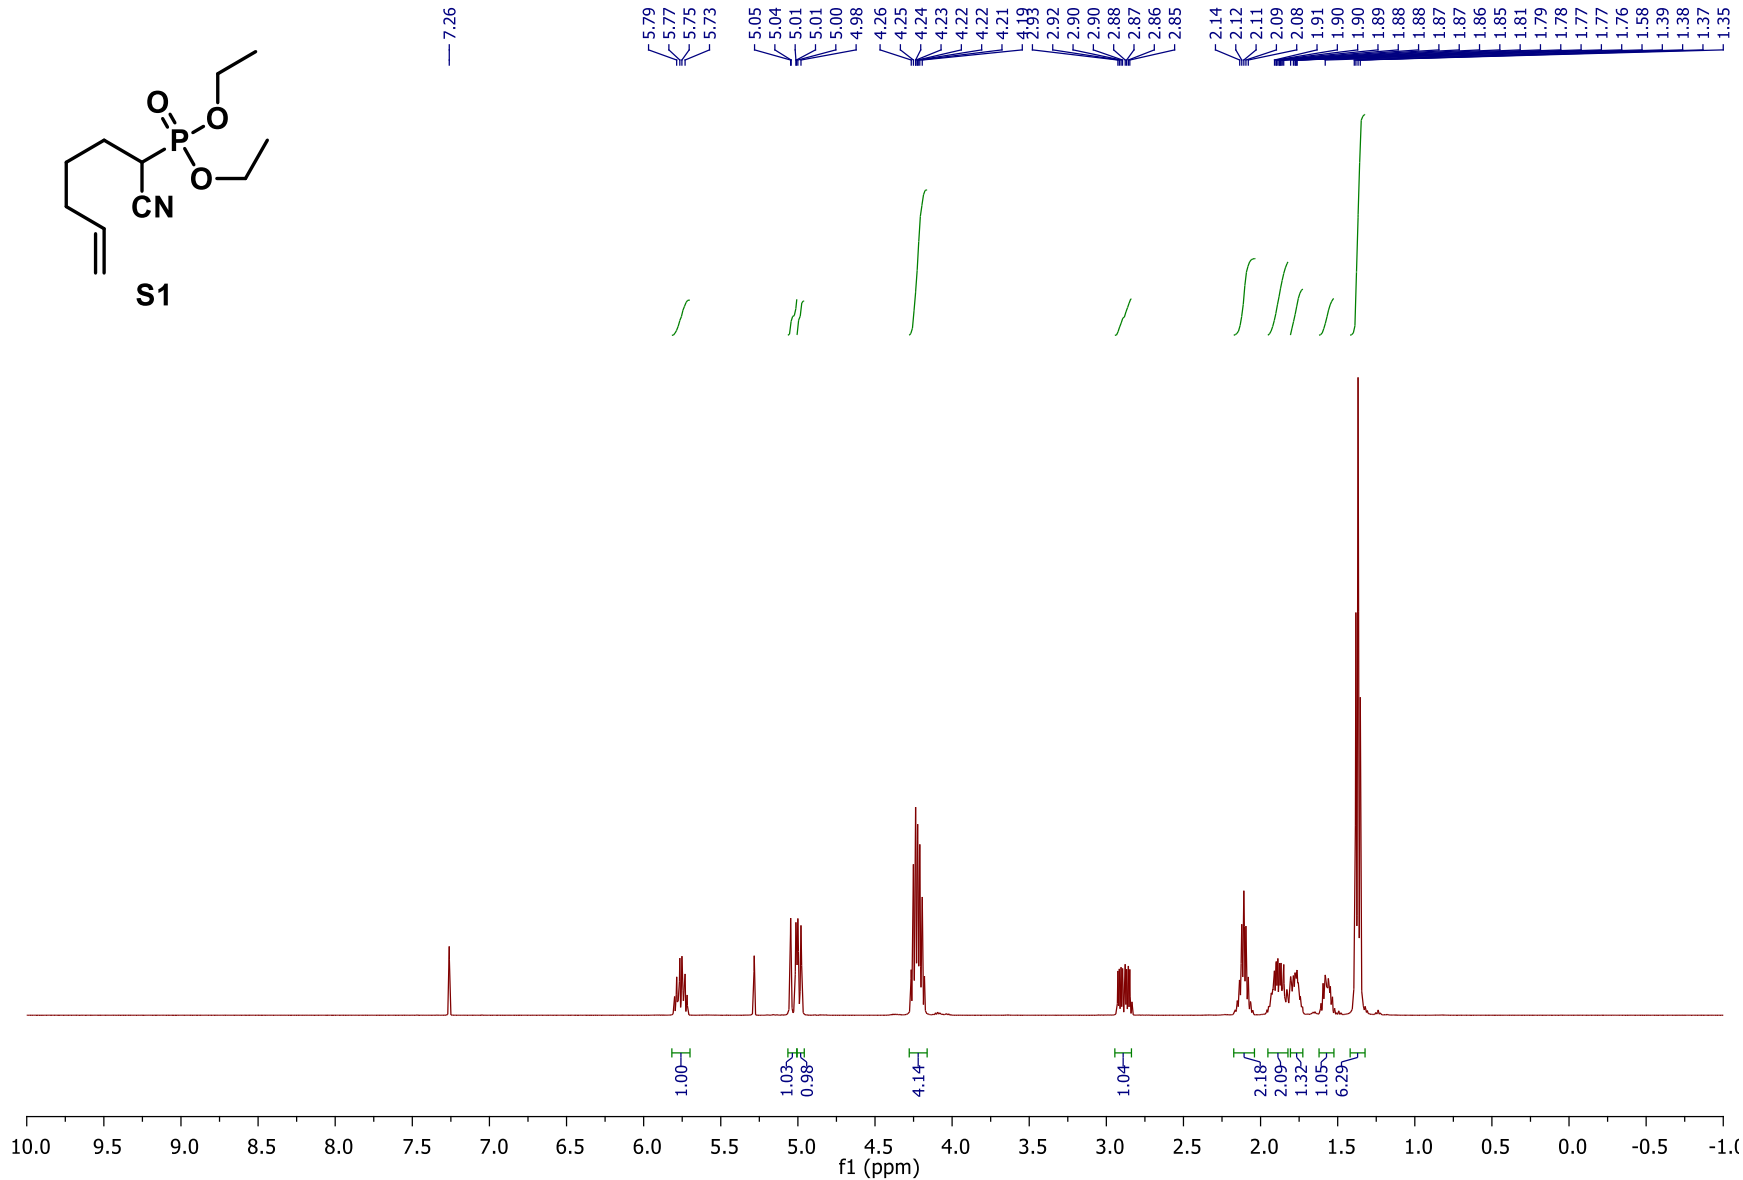



F.  $^1\text{H}$ ,  $^{13}\text{C}$  and 2D NMR Spectra

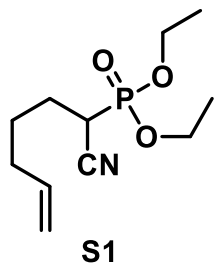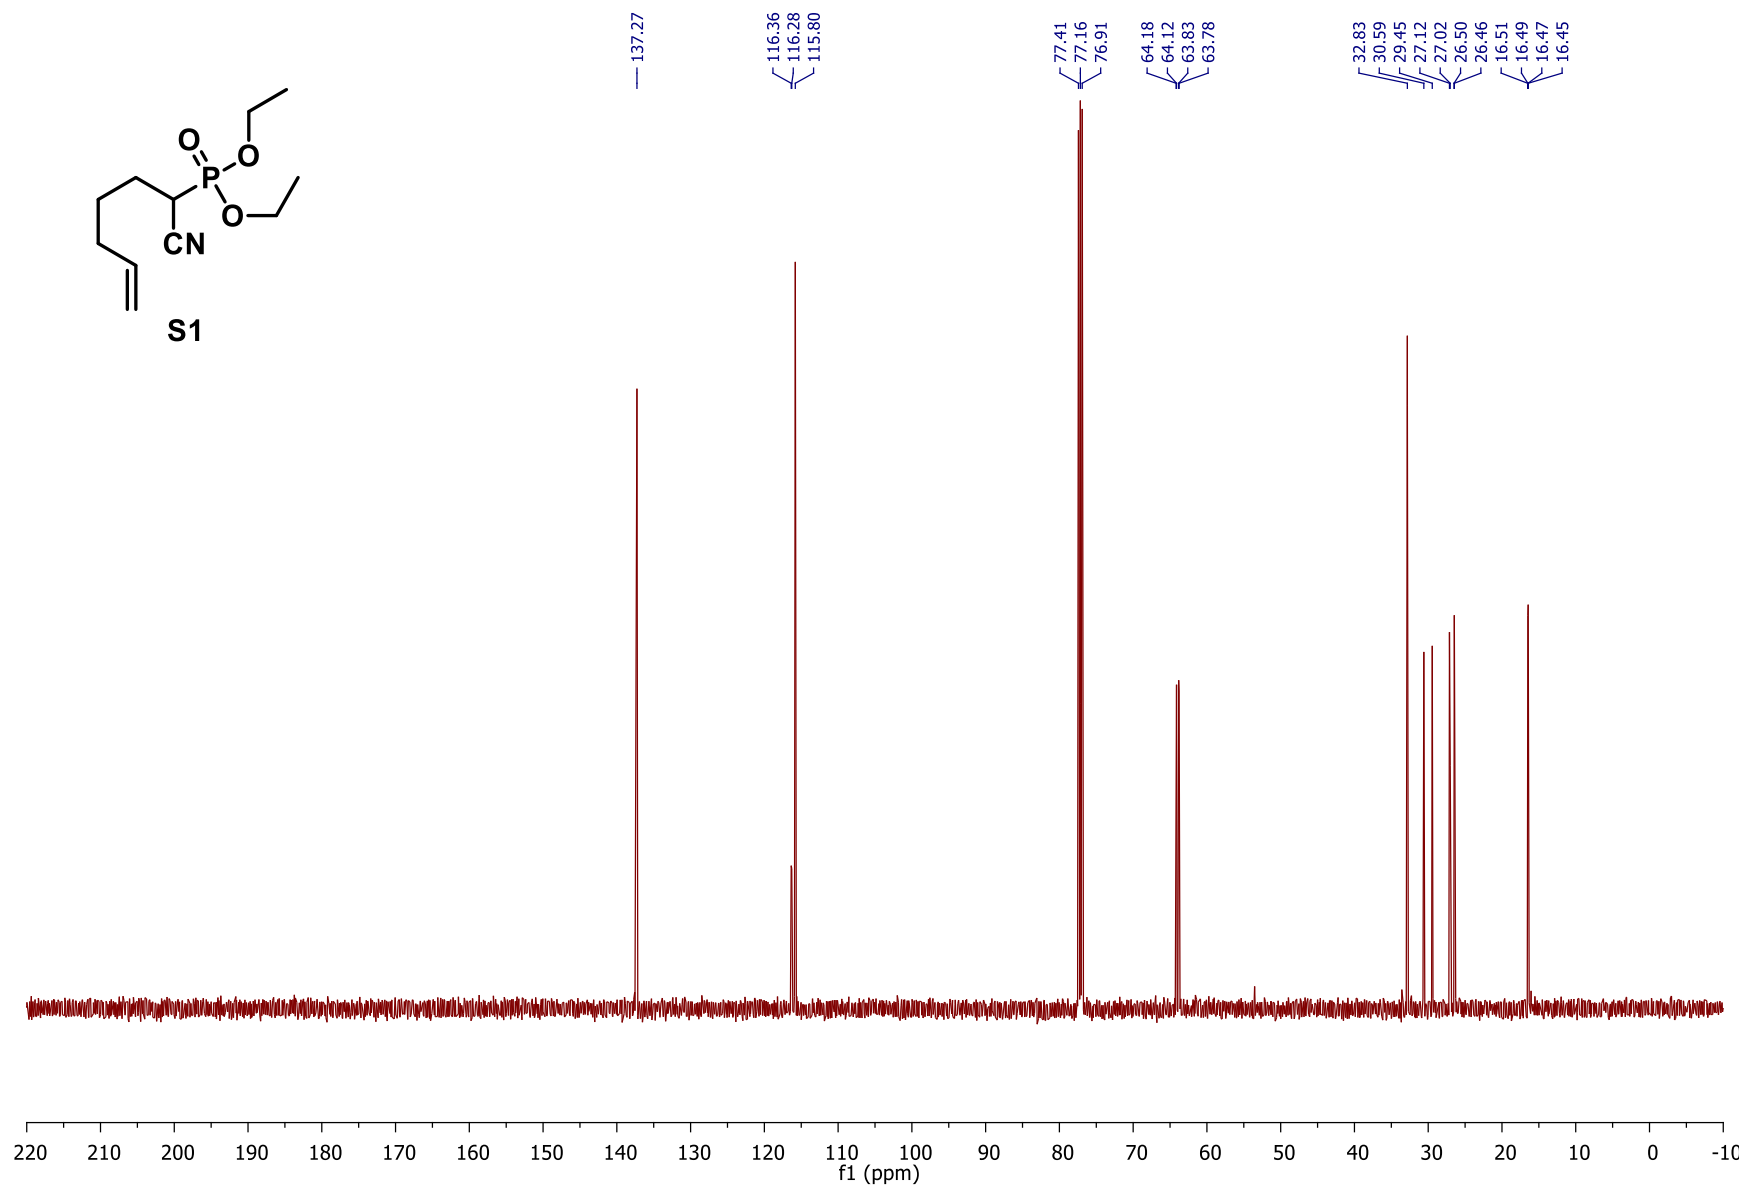

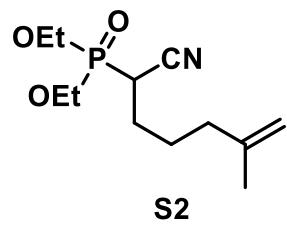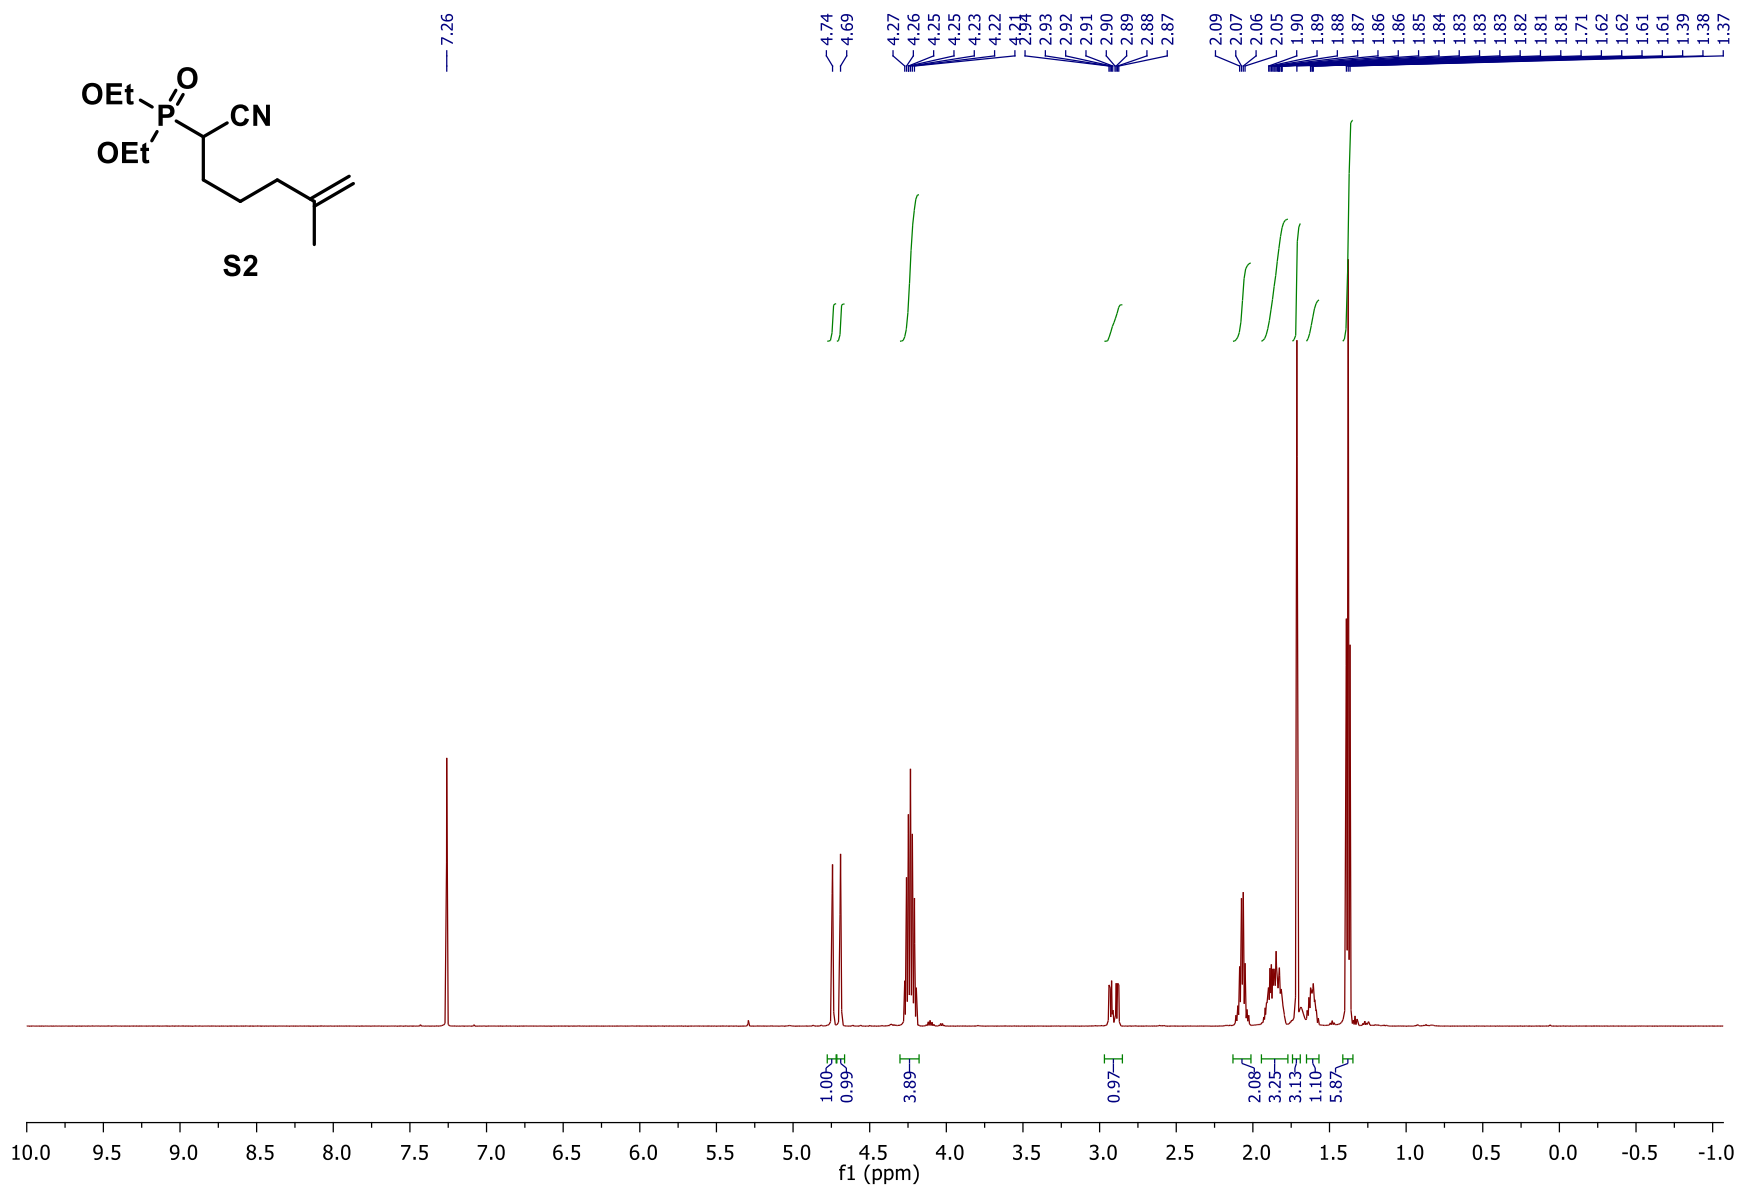

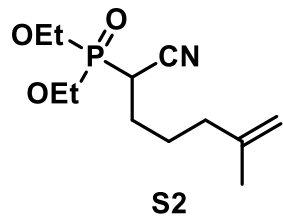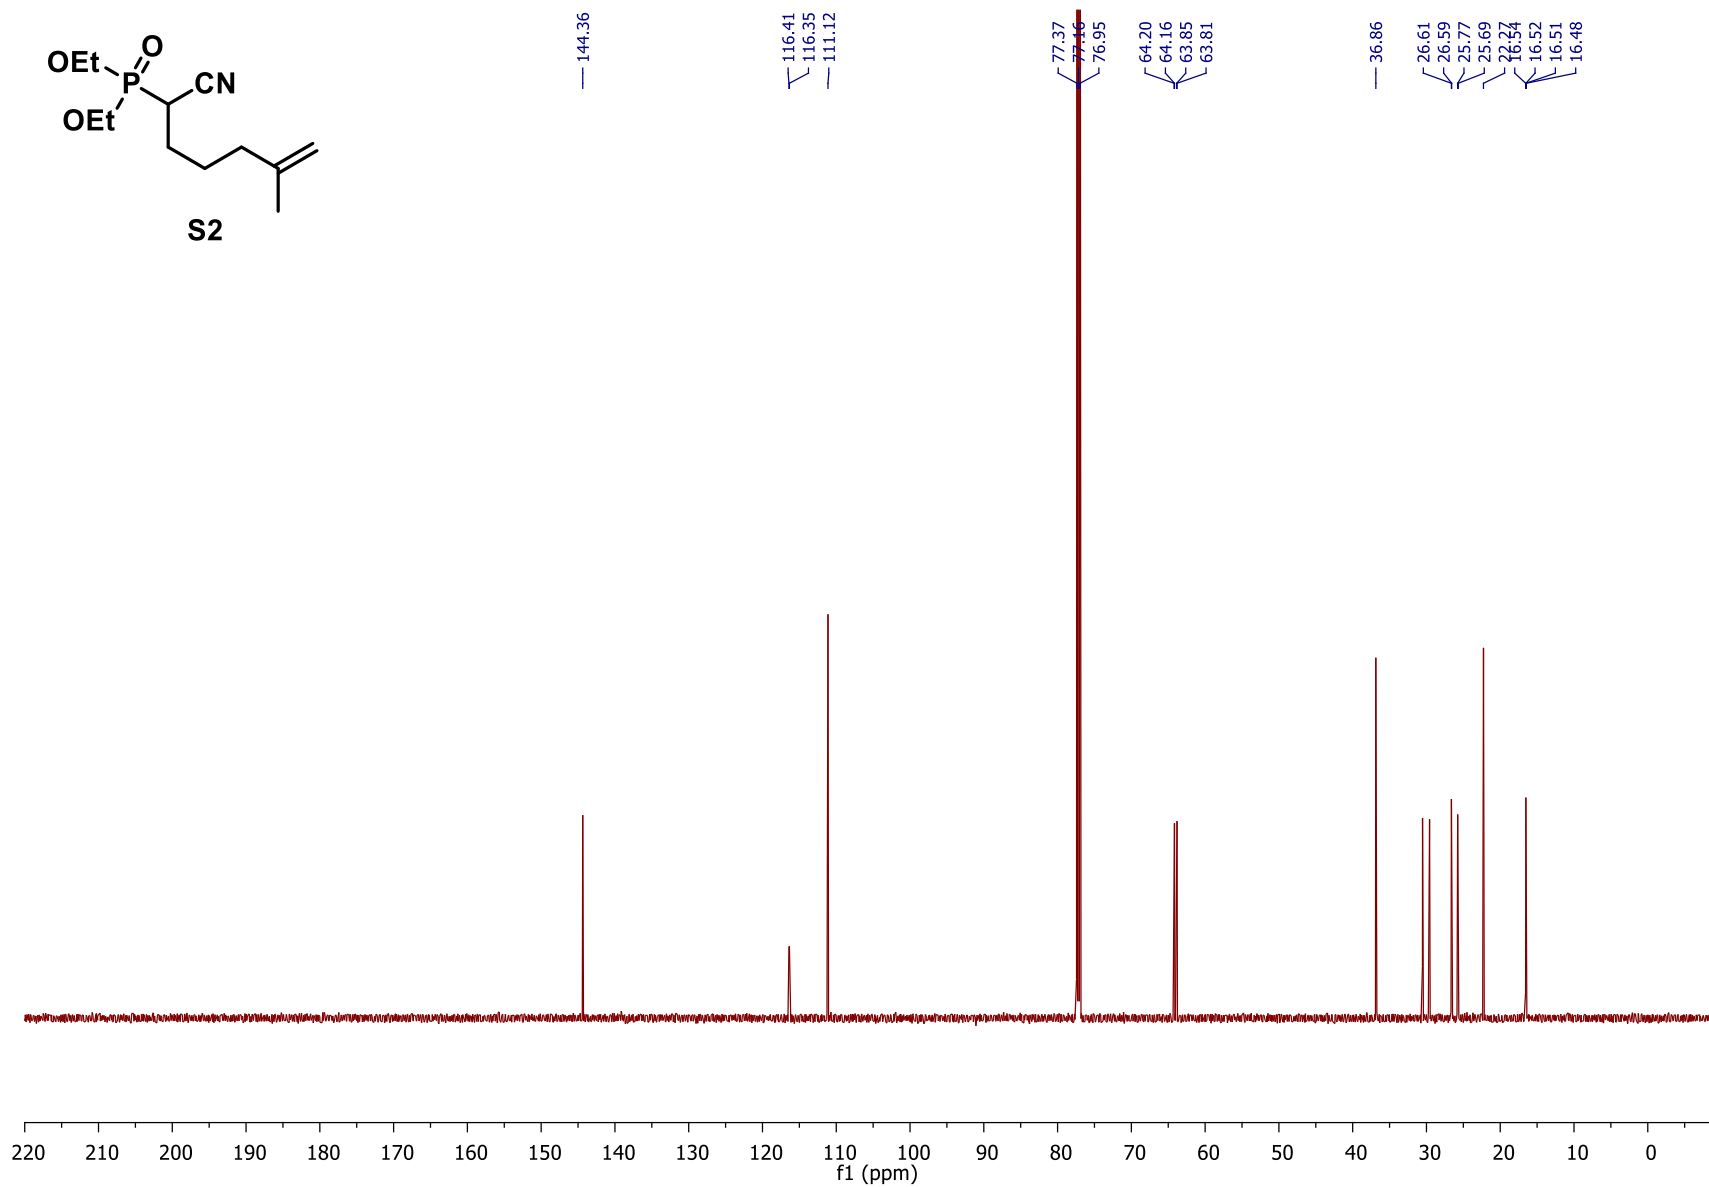

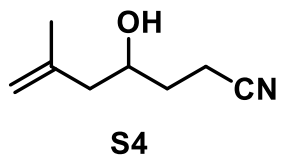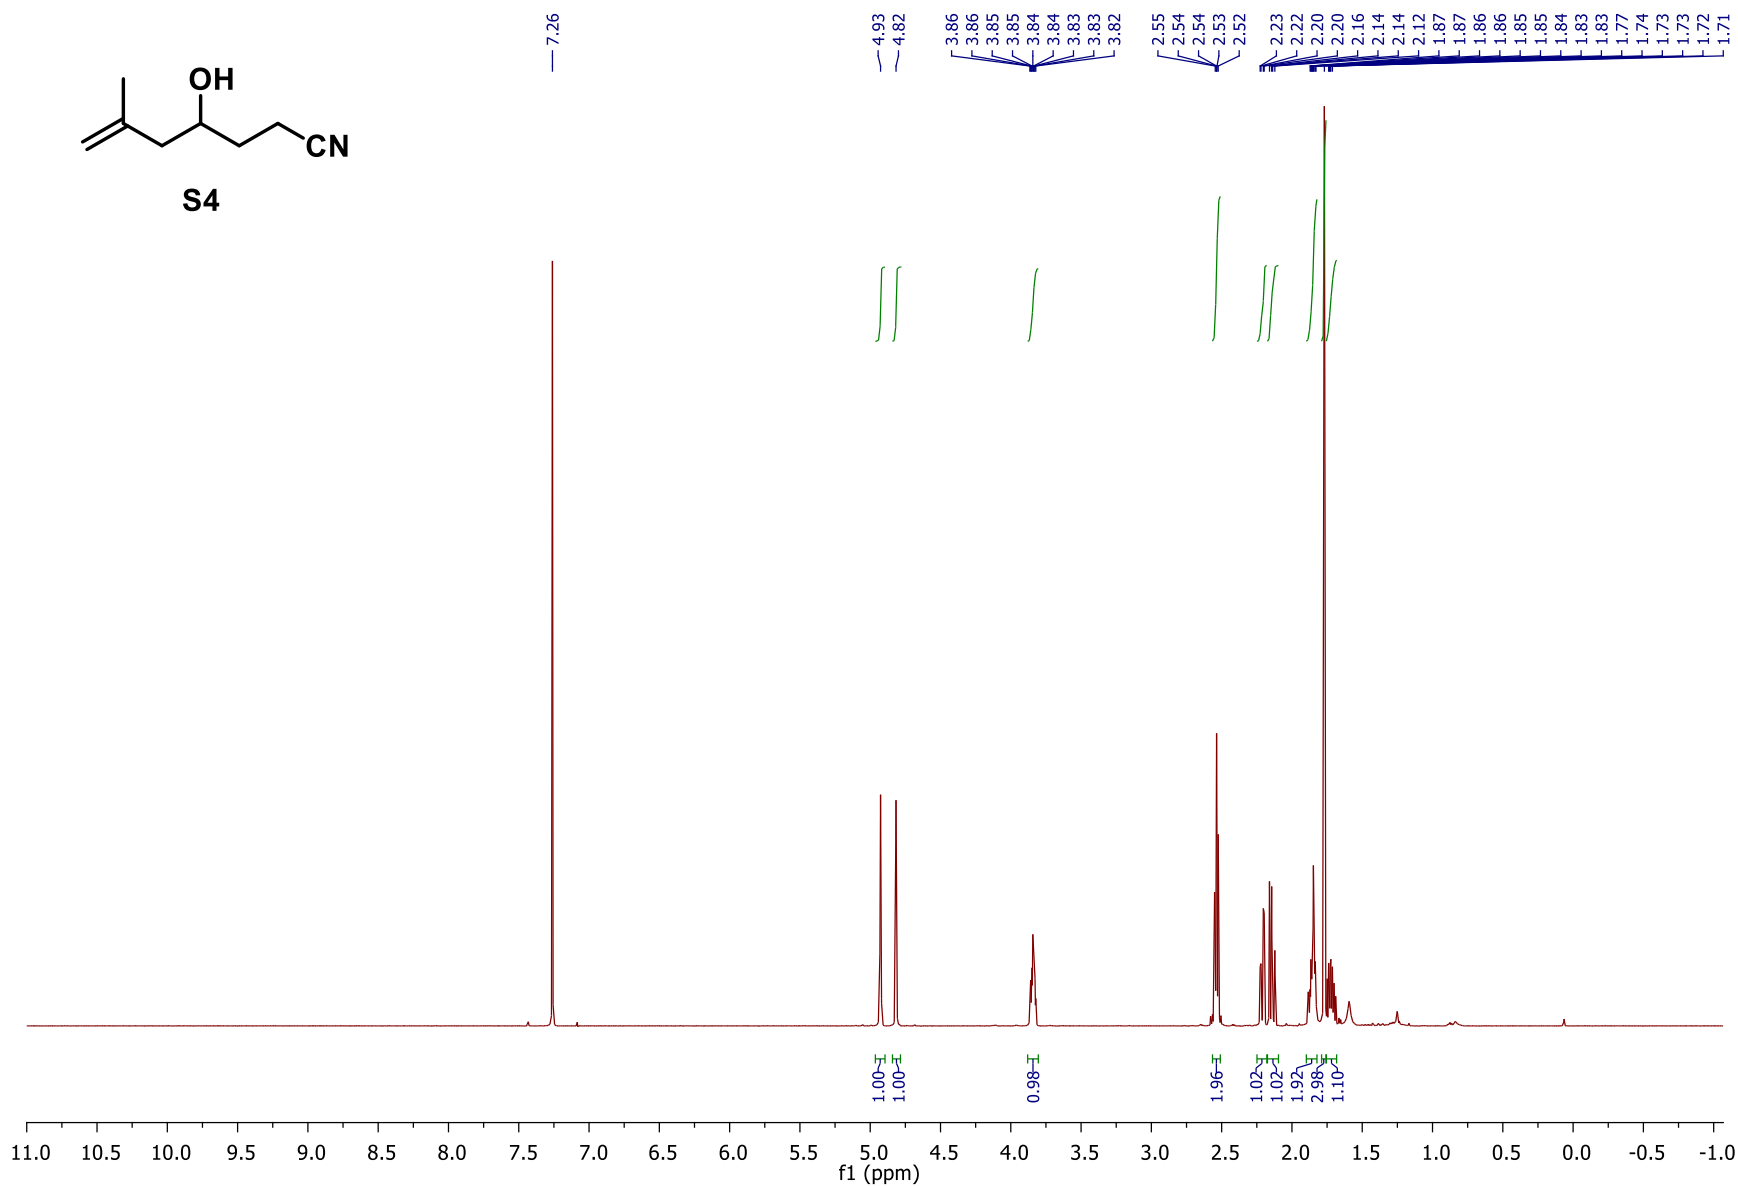

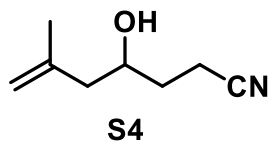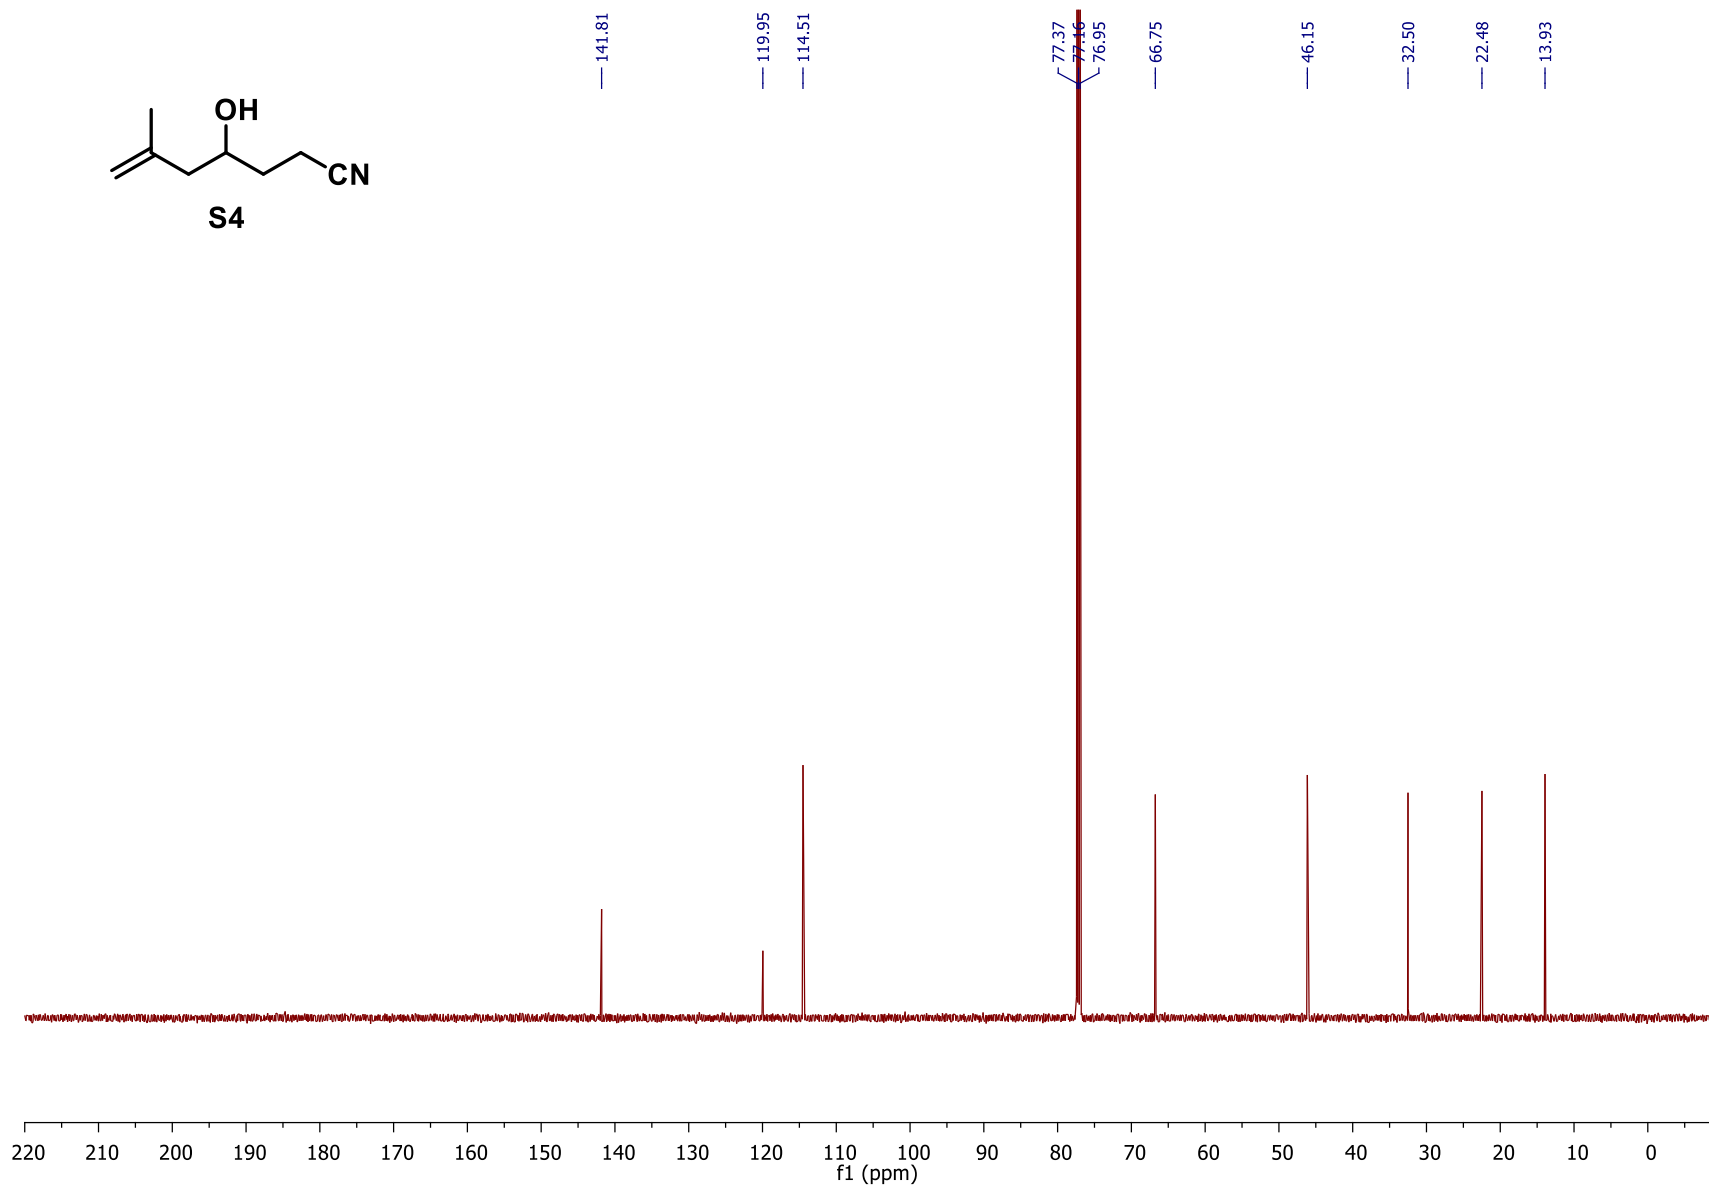

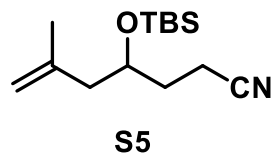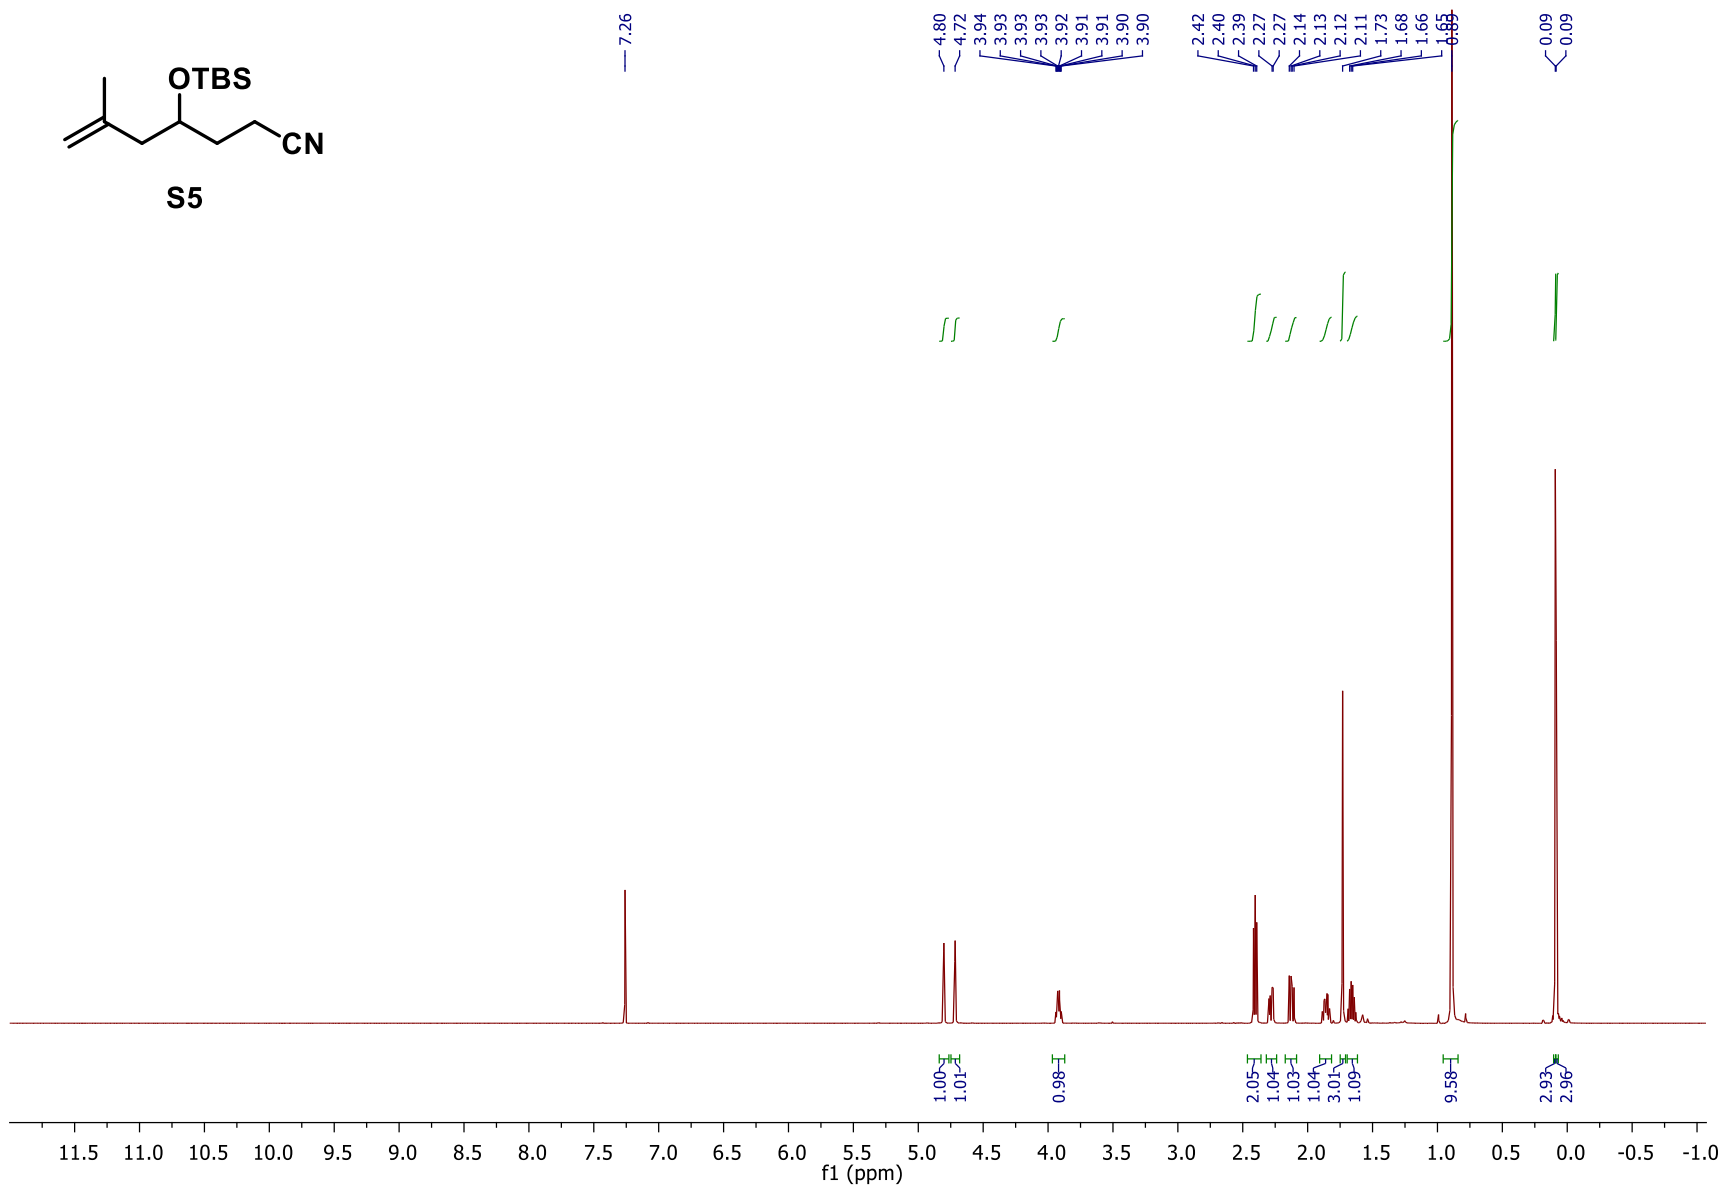

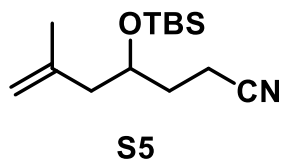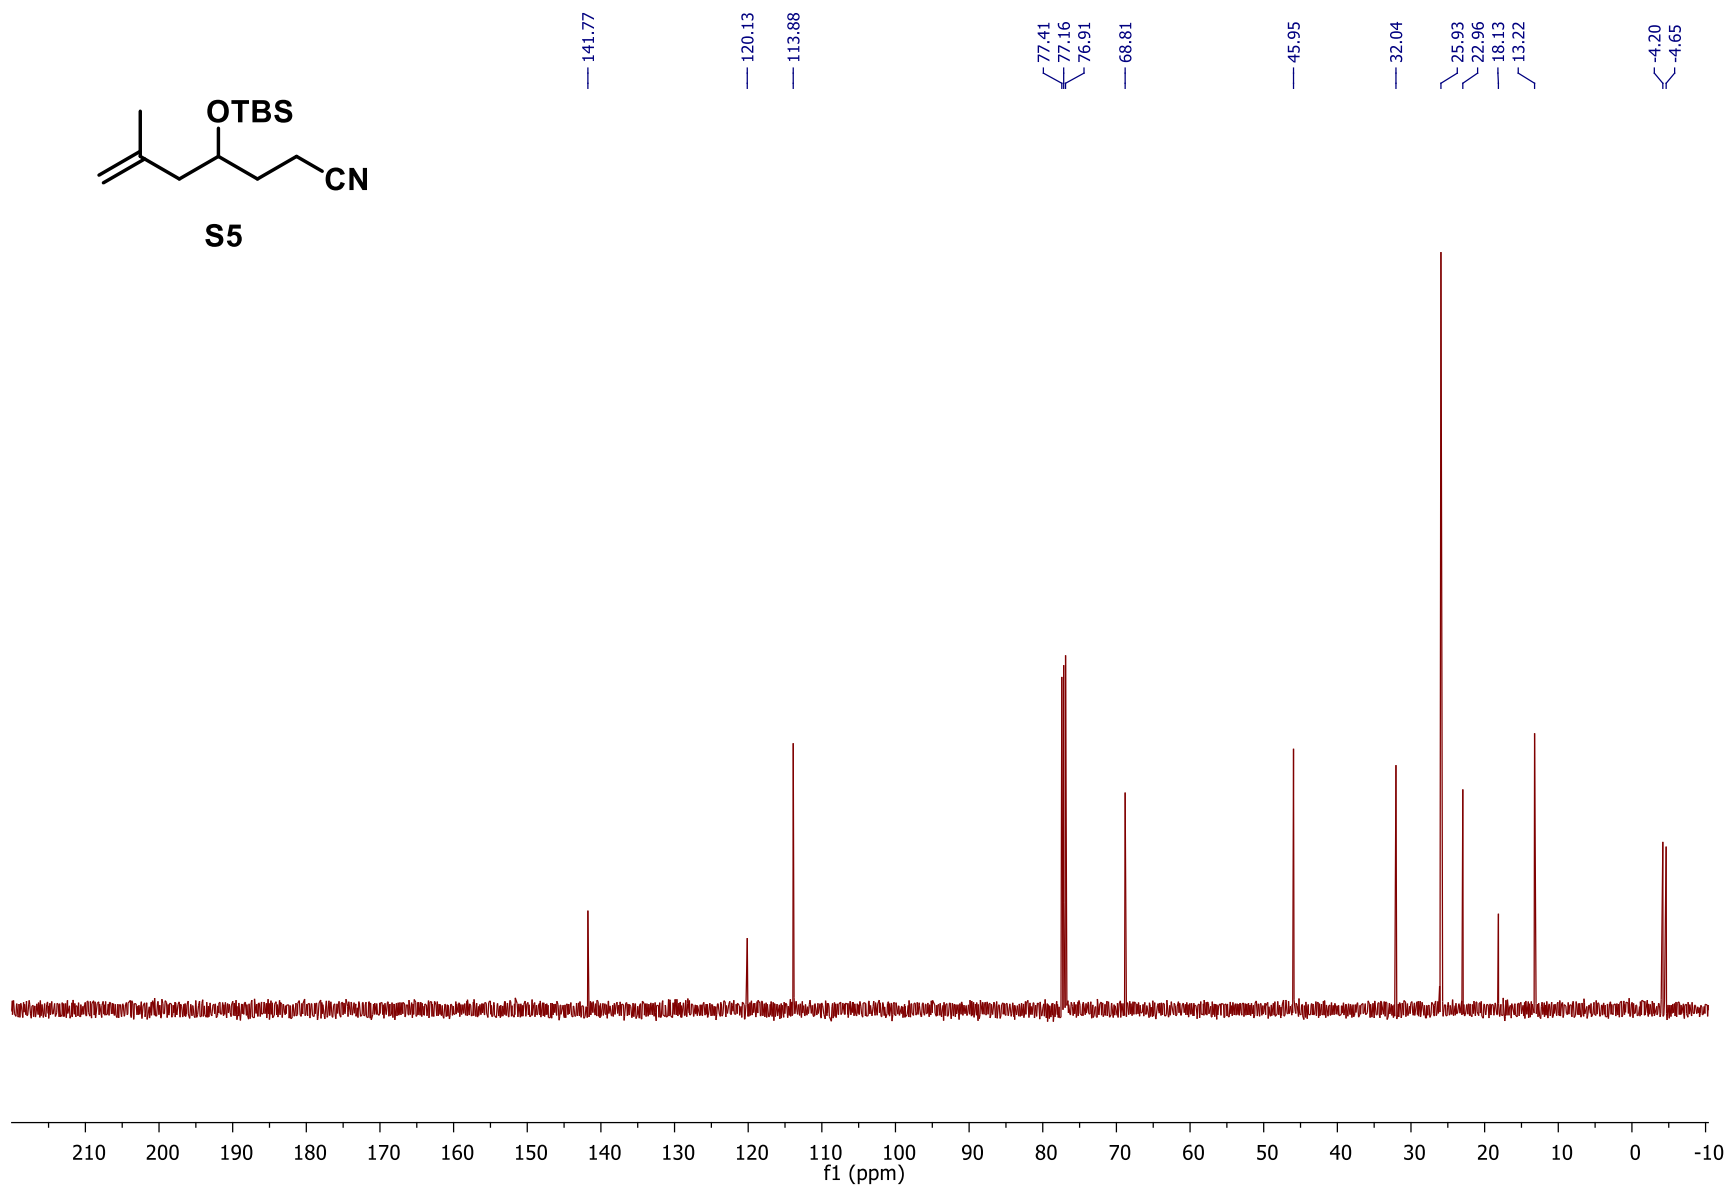

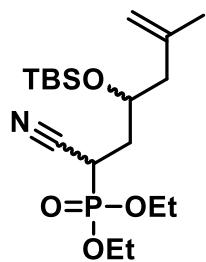

S6 (mixture of diastereomers)

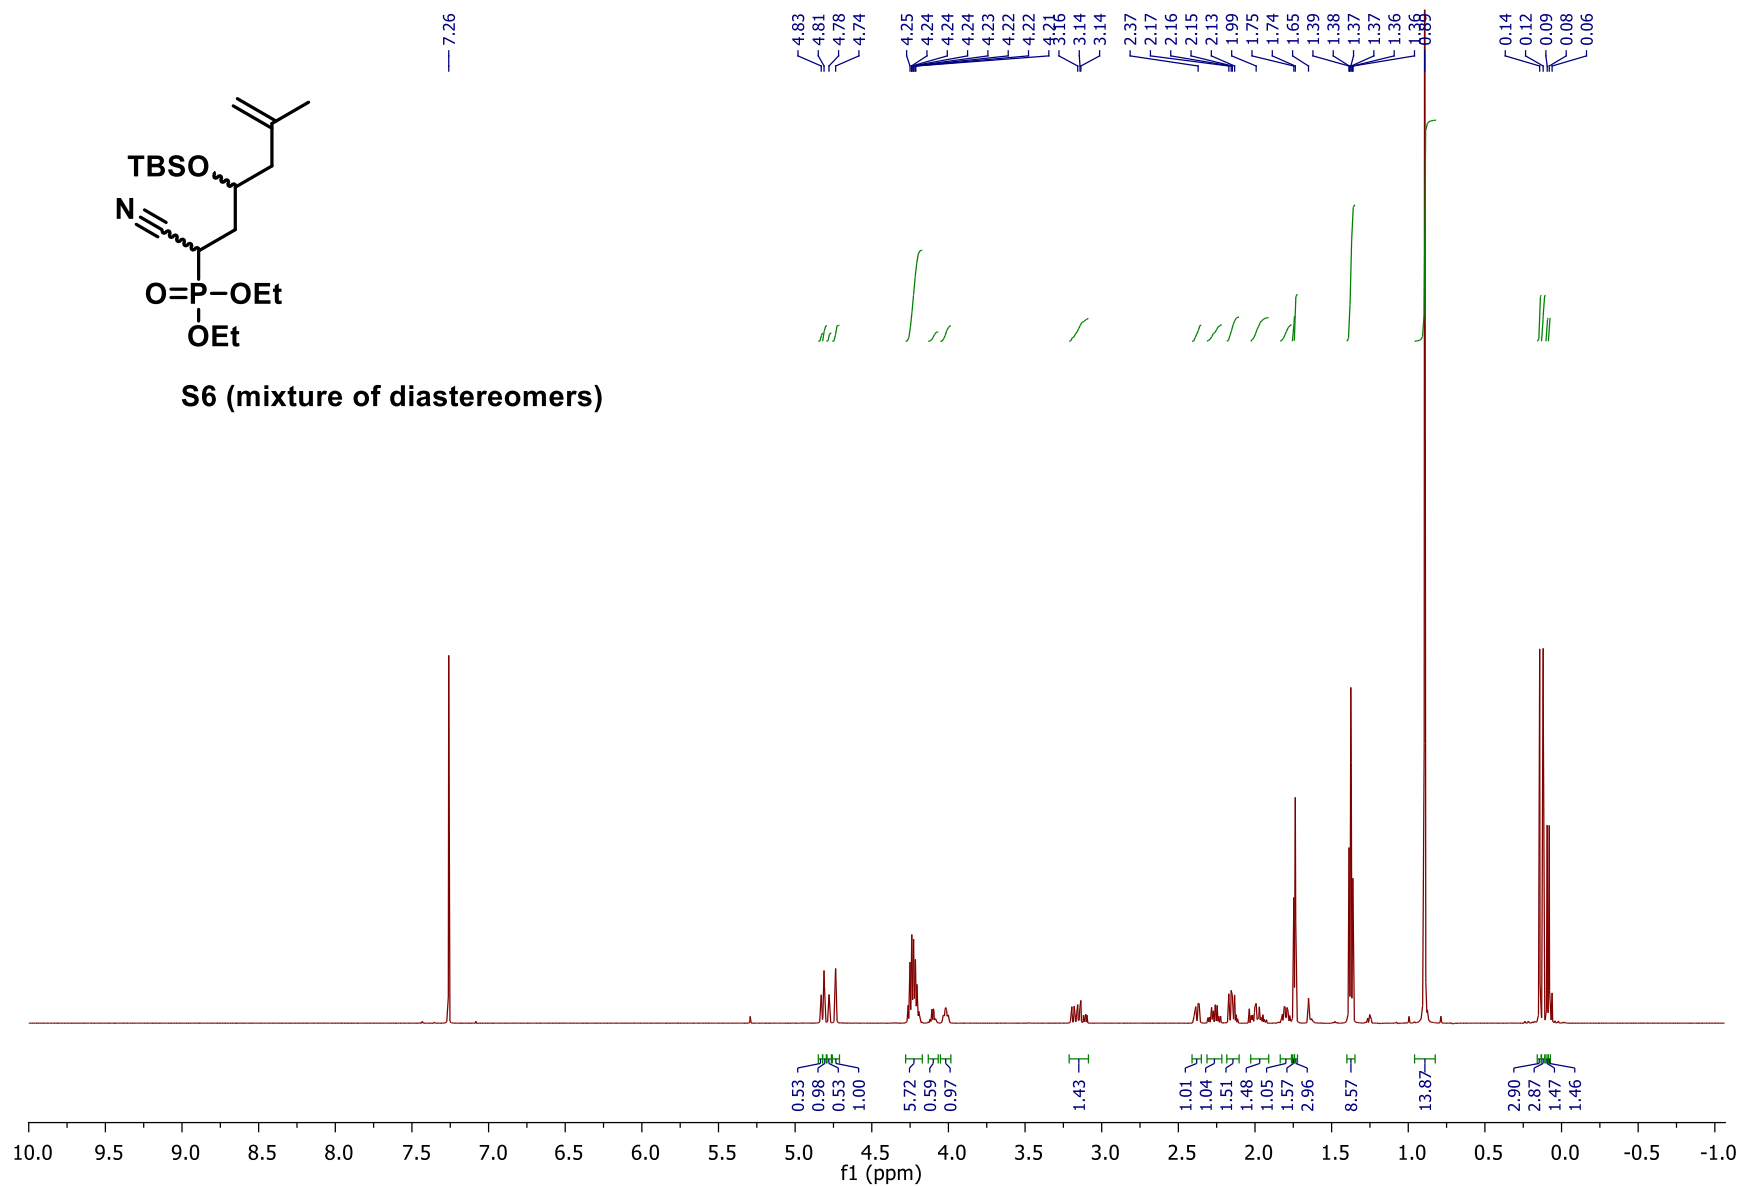



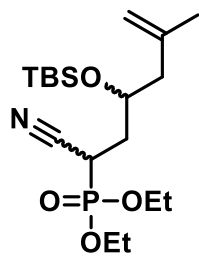

S6 (mixture of diastereomers)

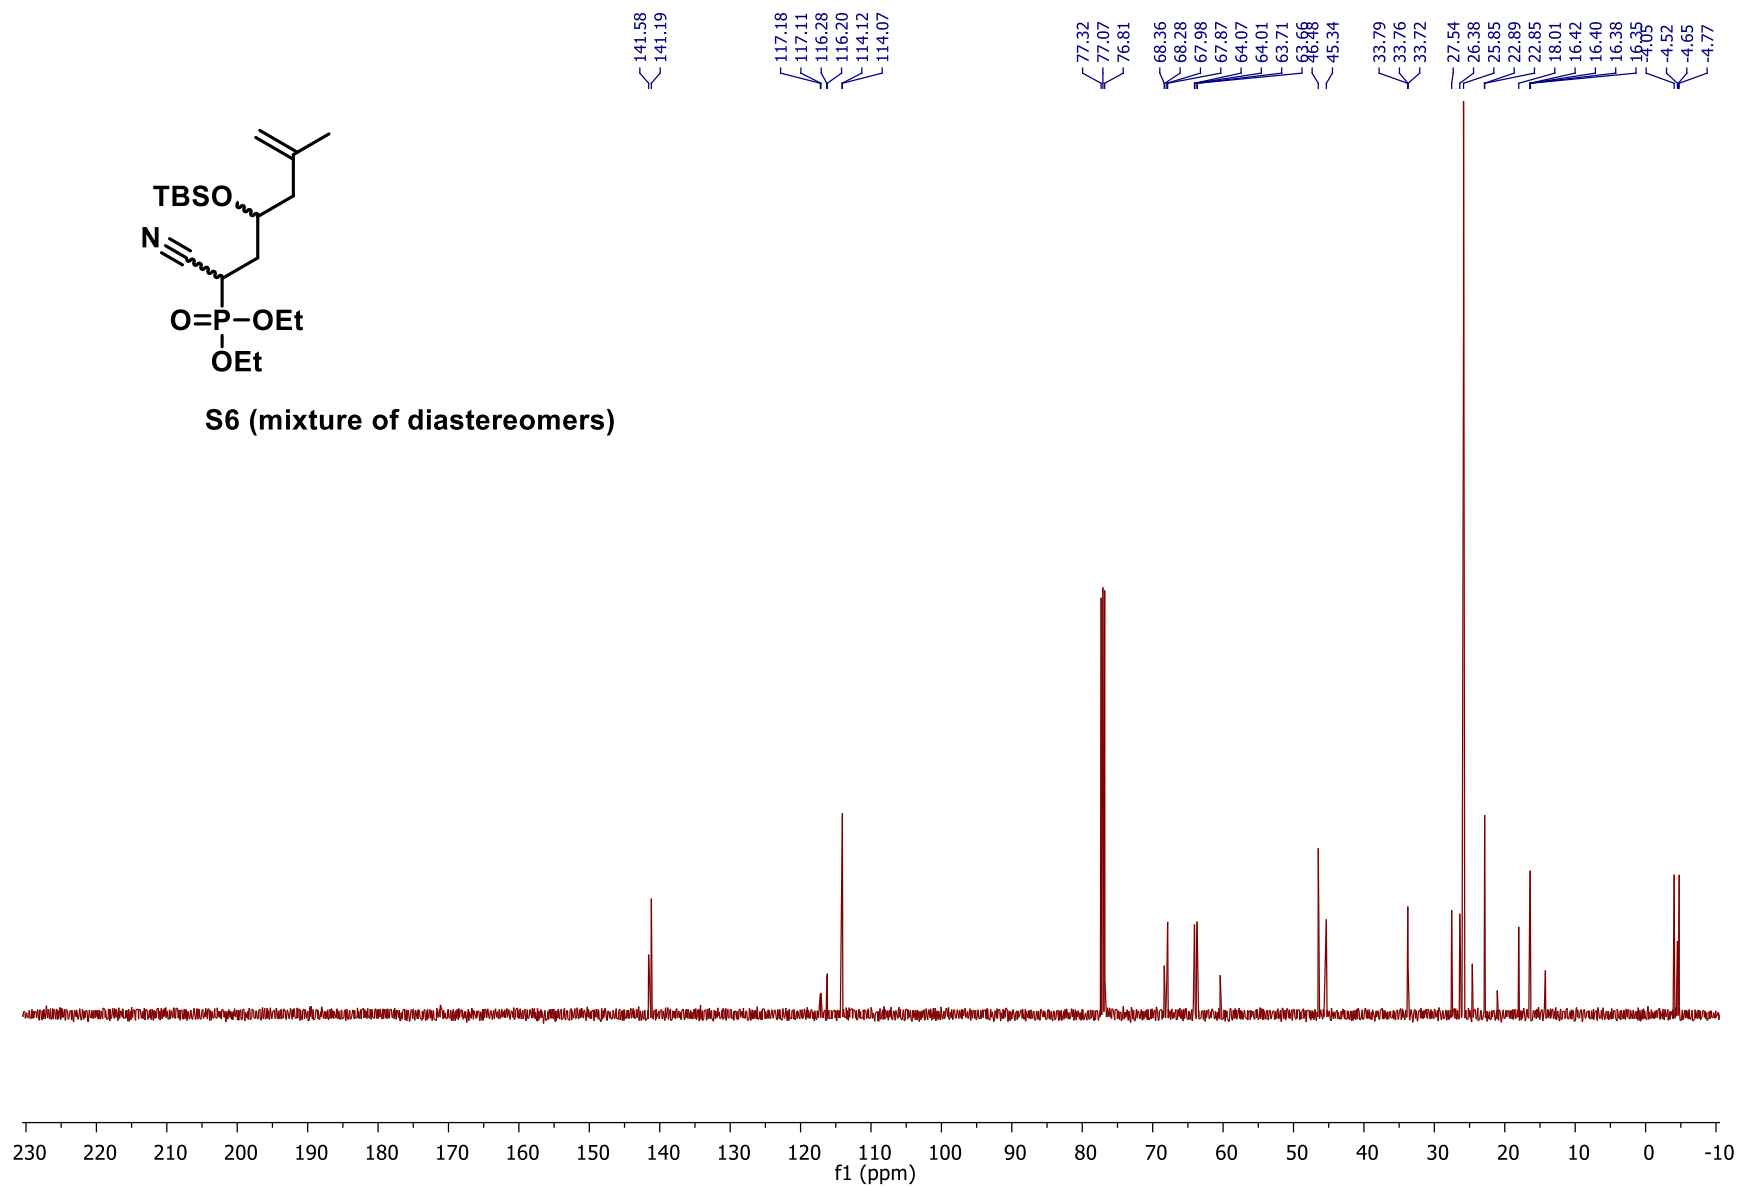

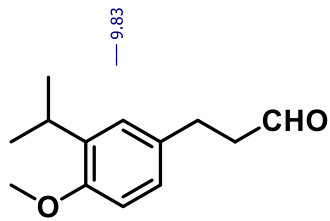

S8

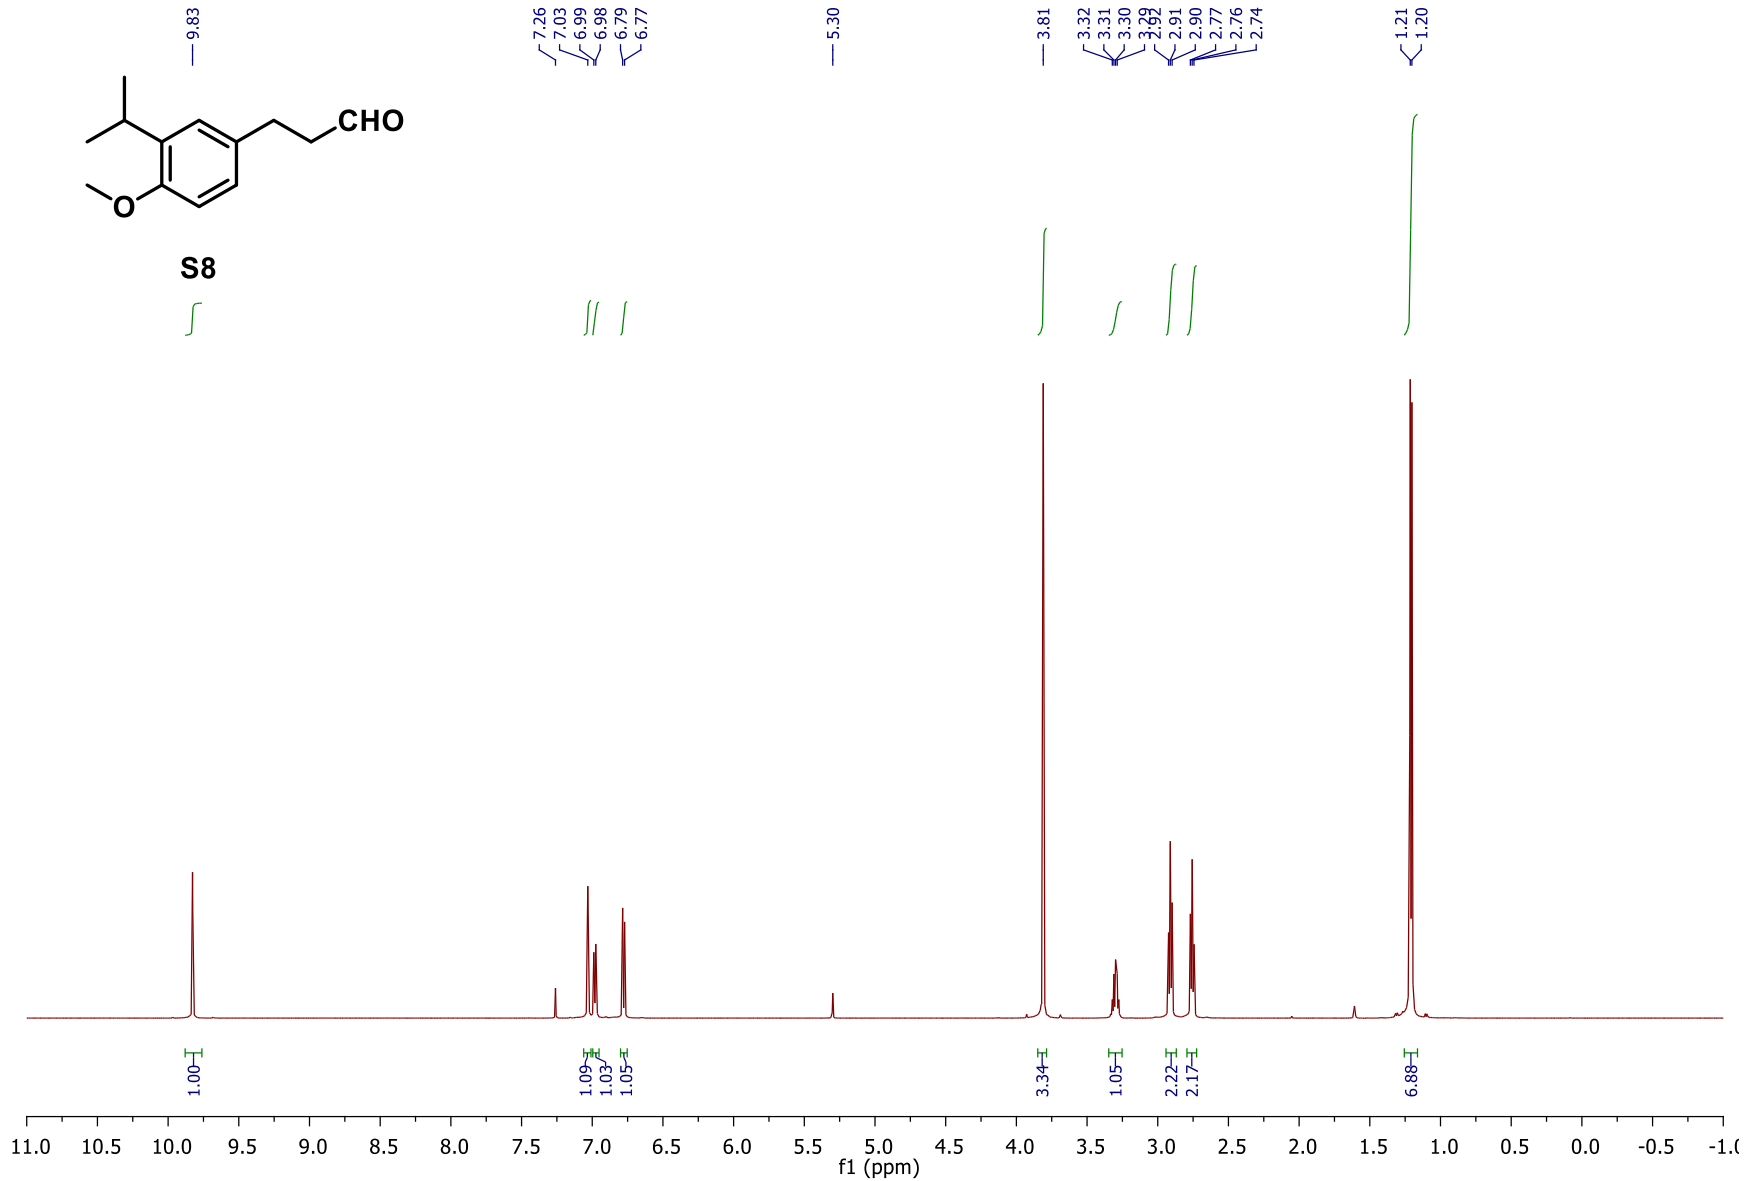







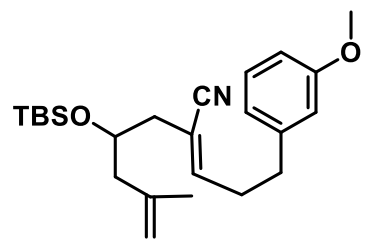

S11

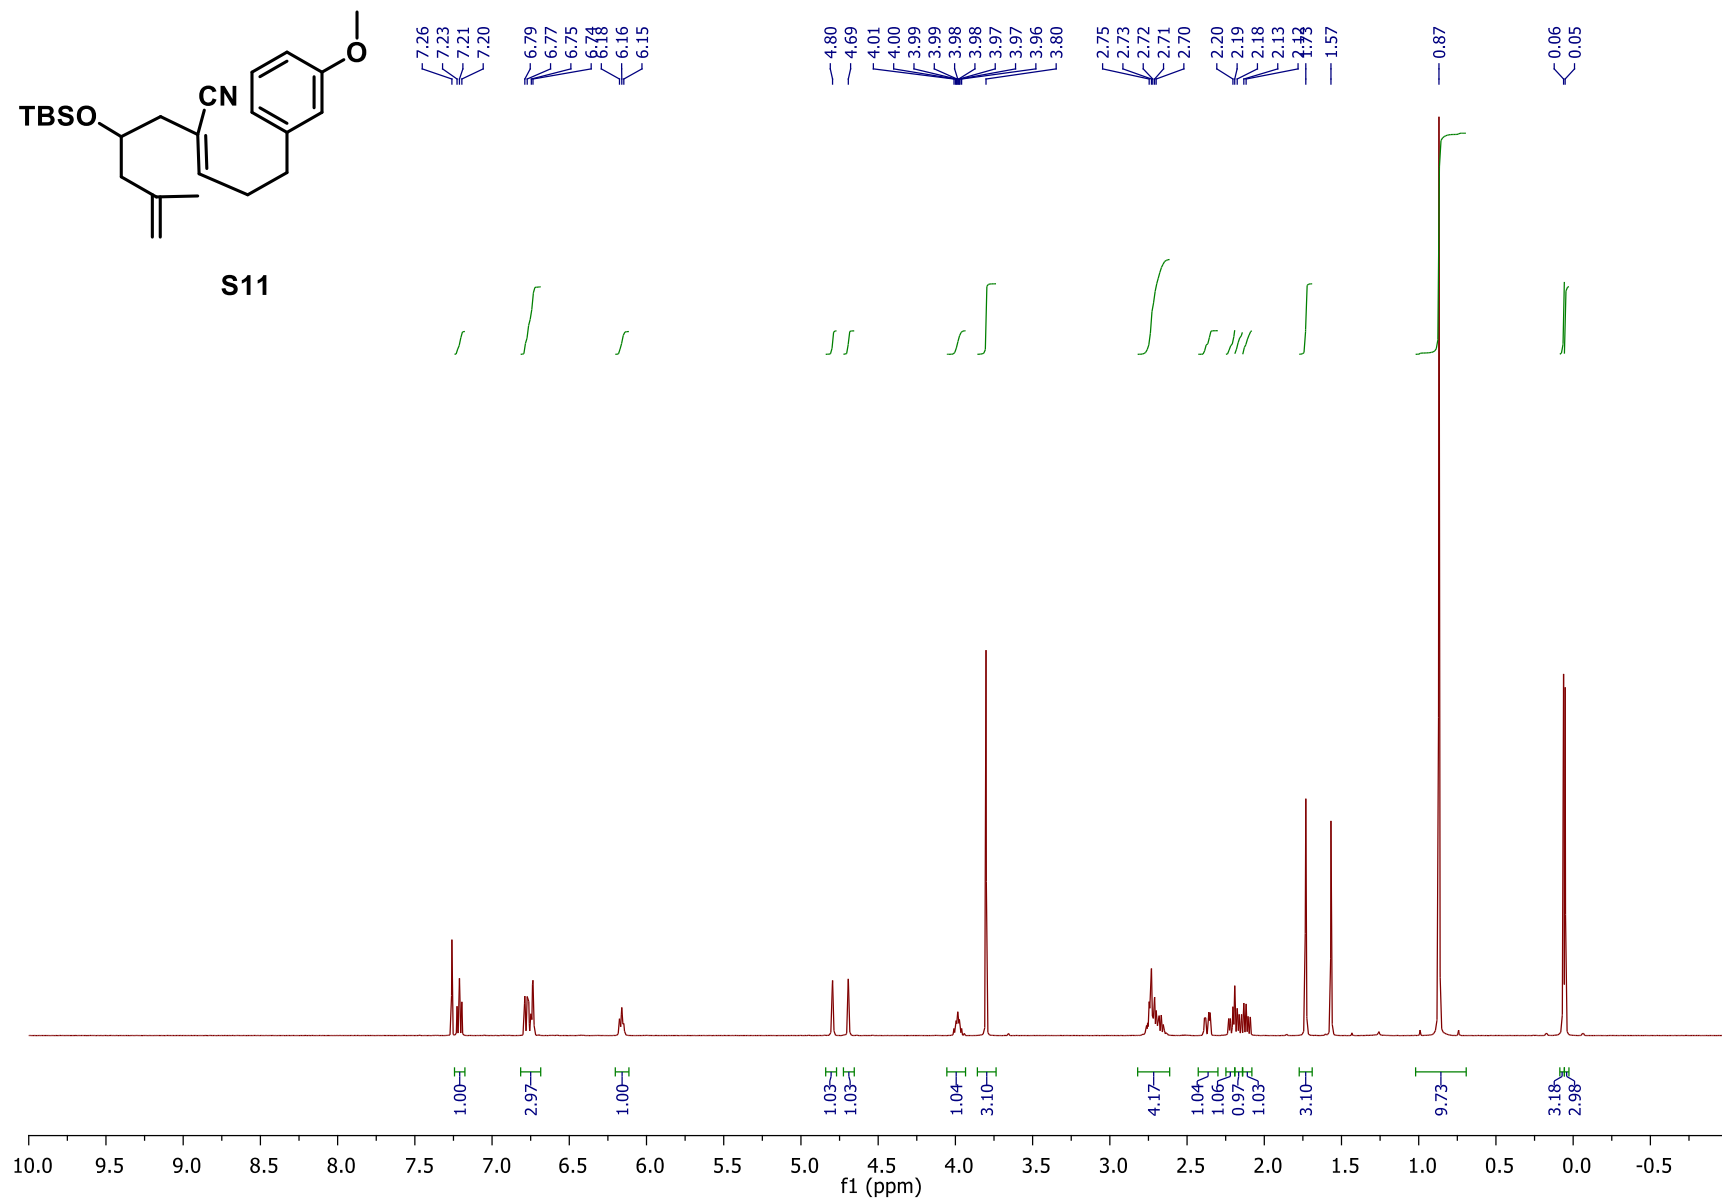

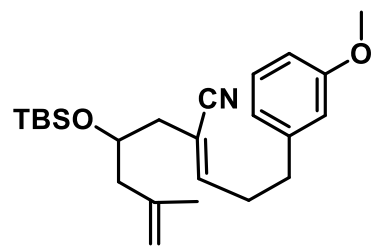

S11

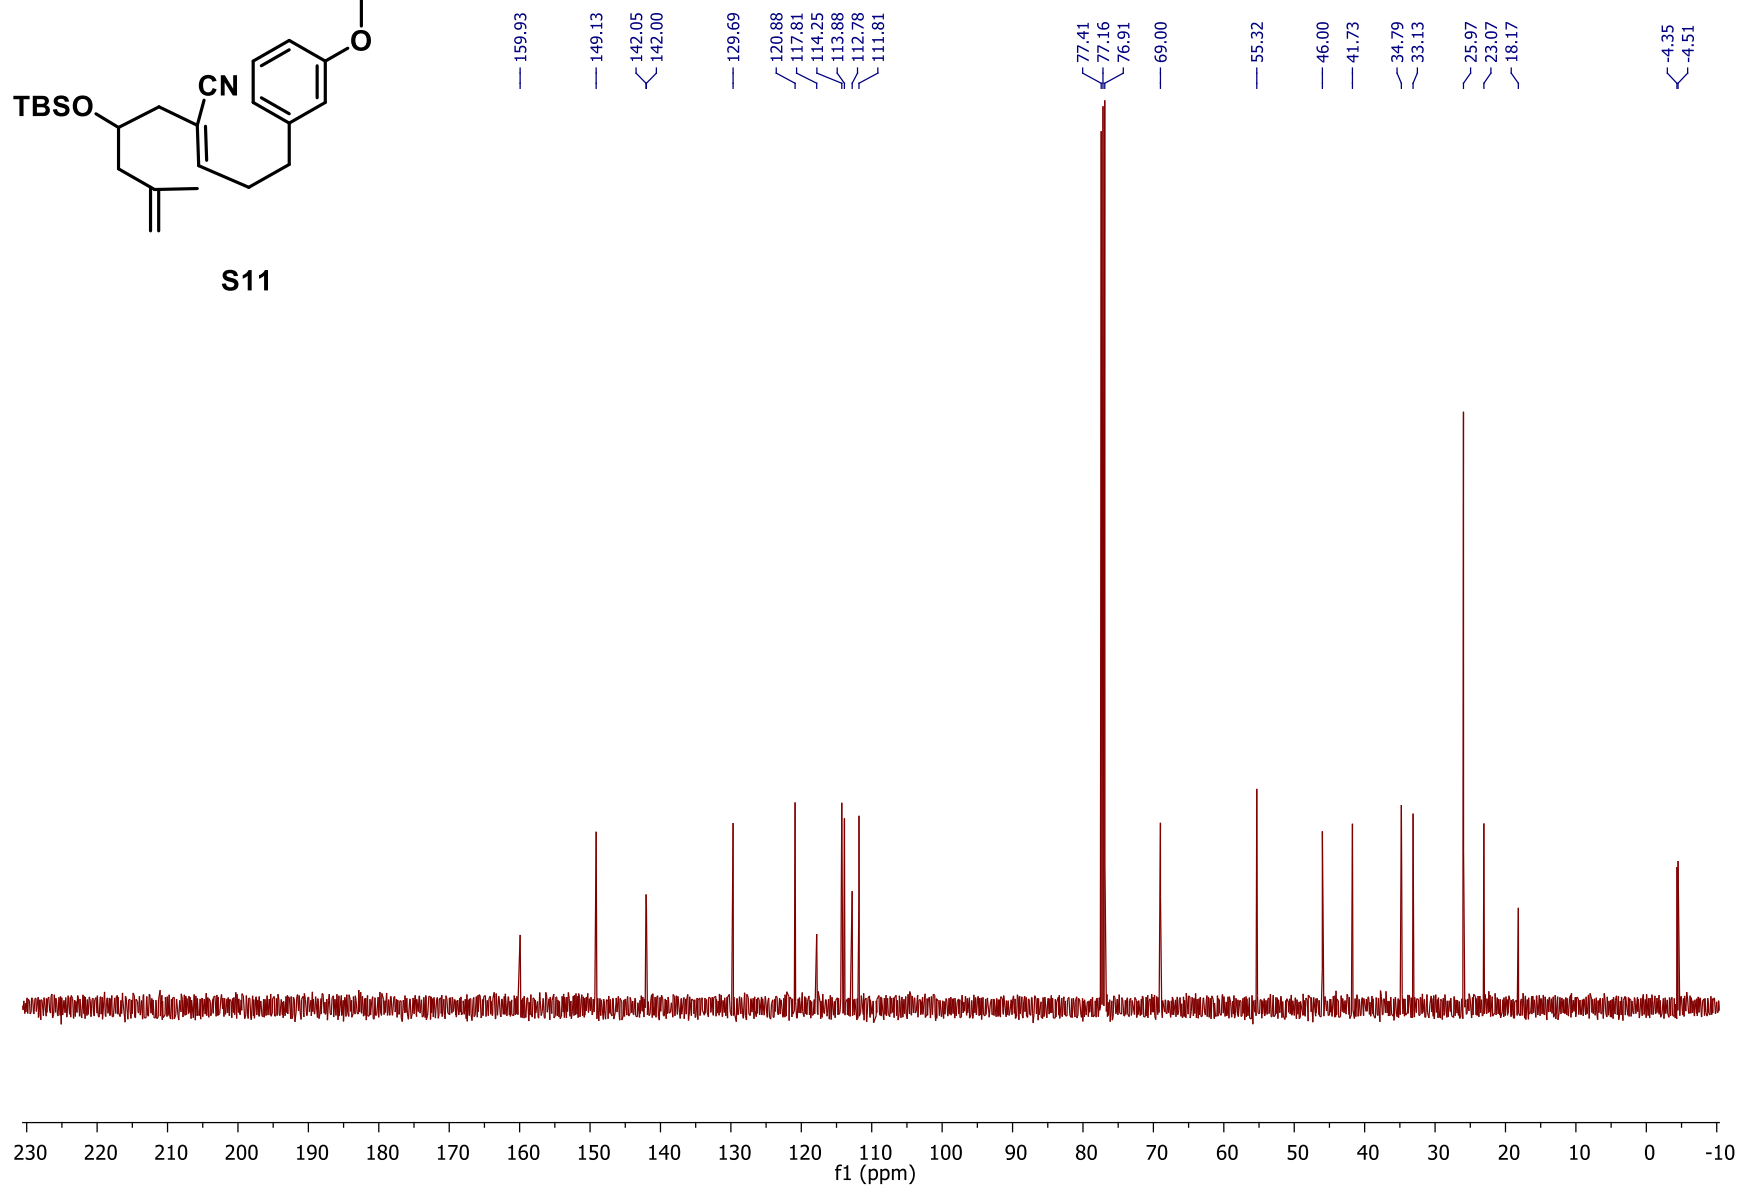

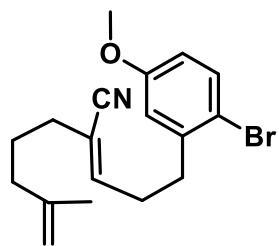

S13

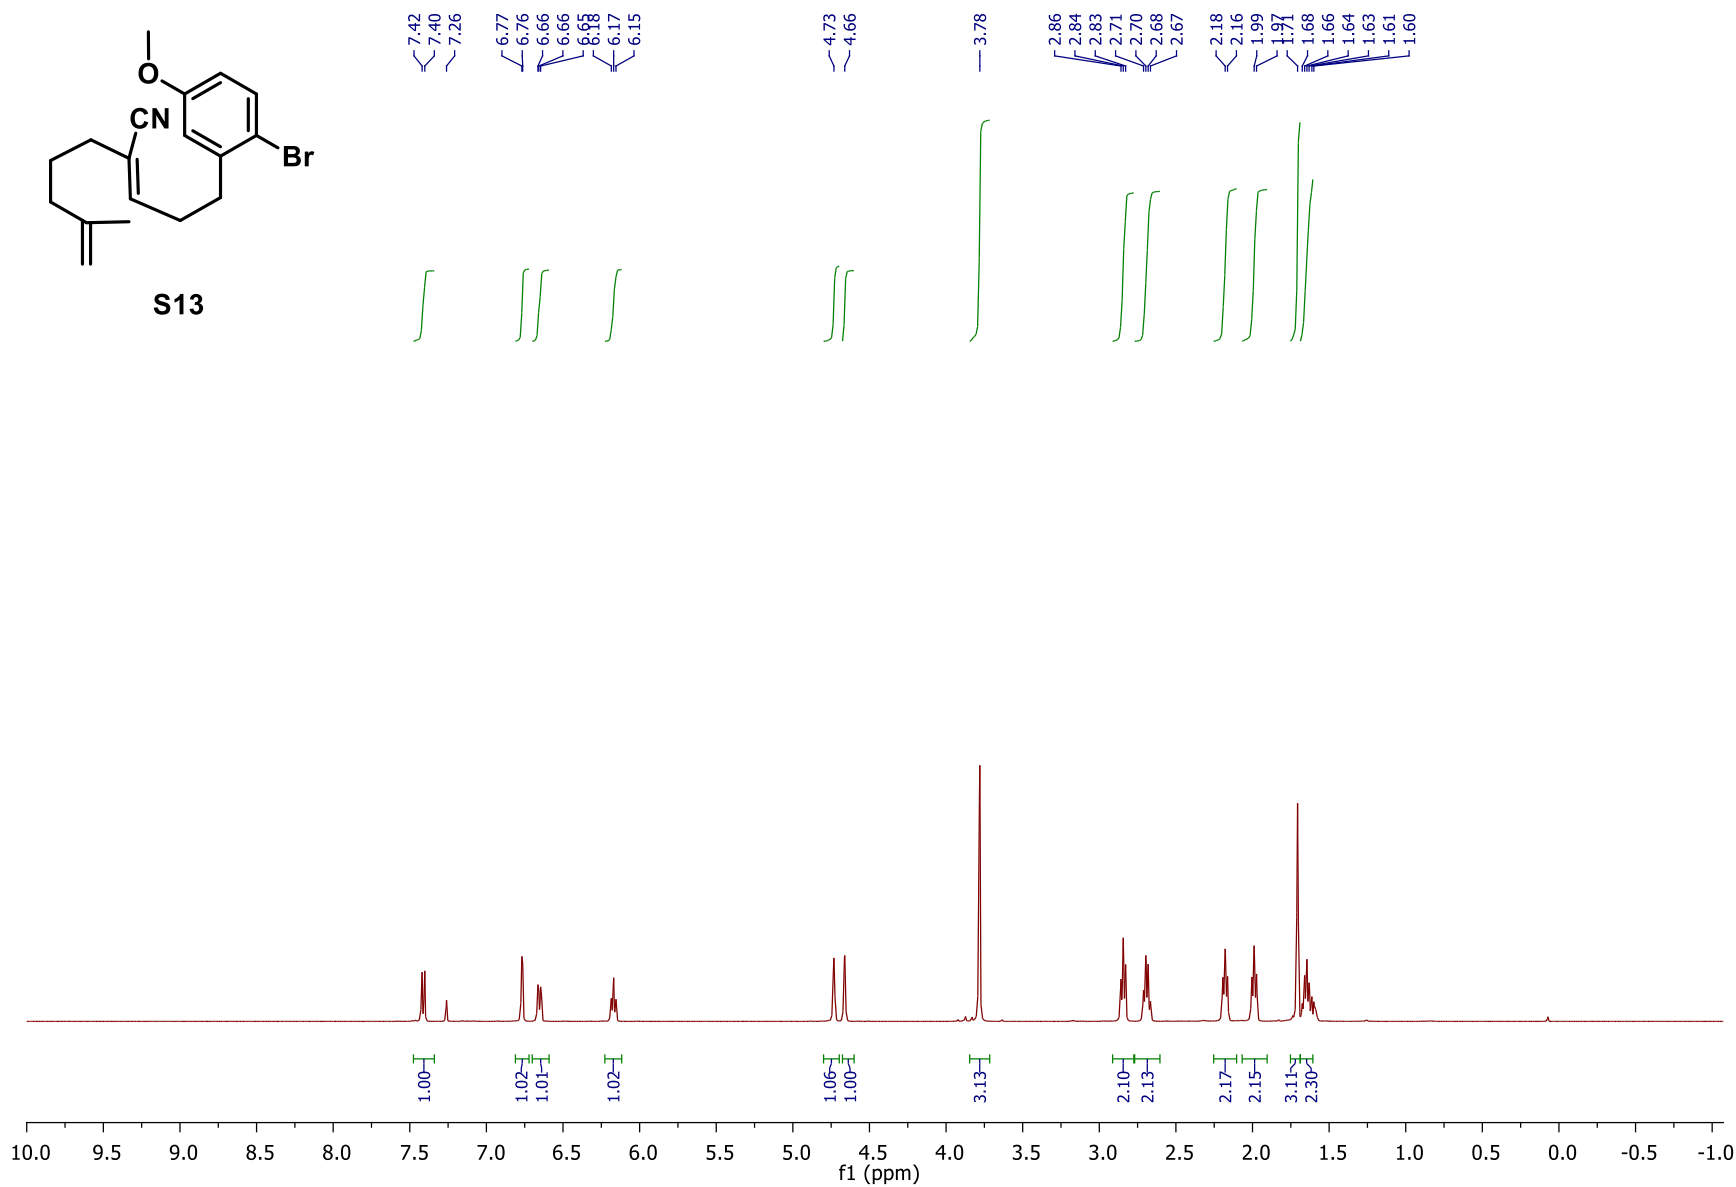



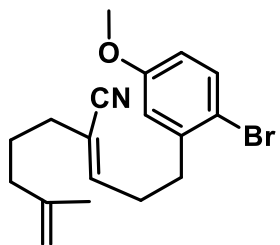

S13

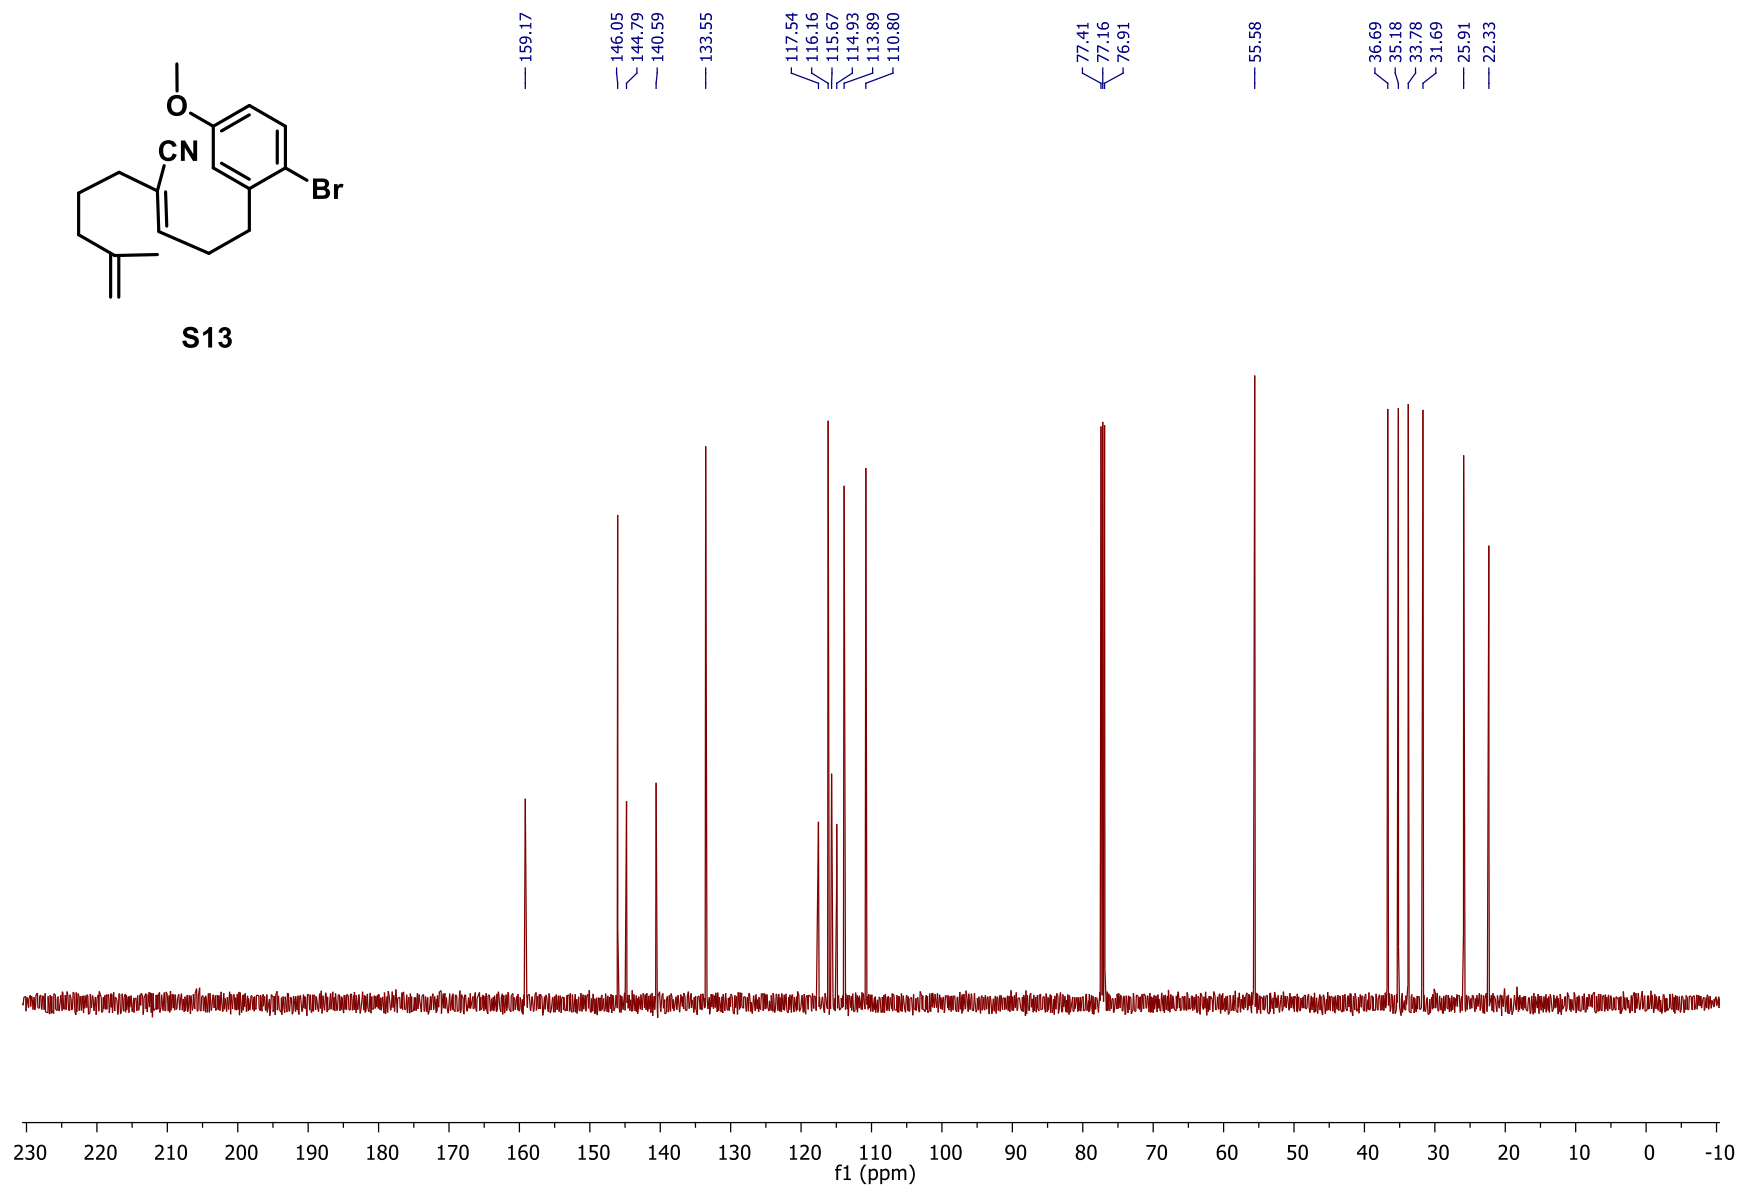

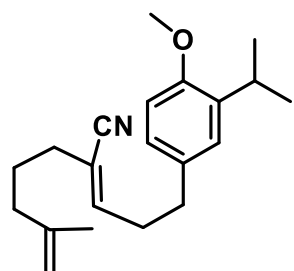

S14

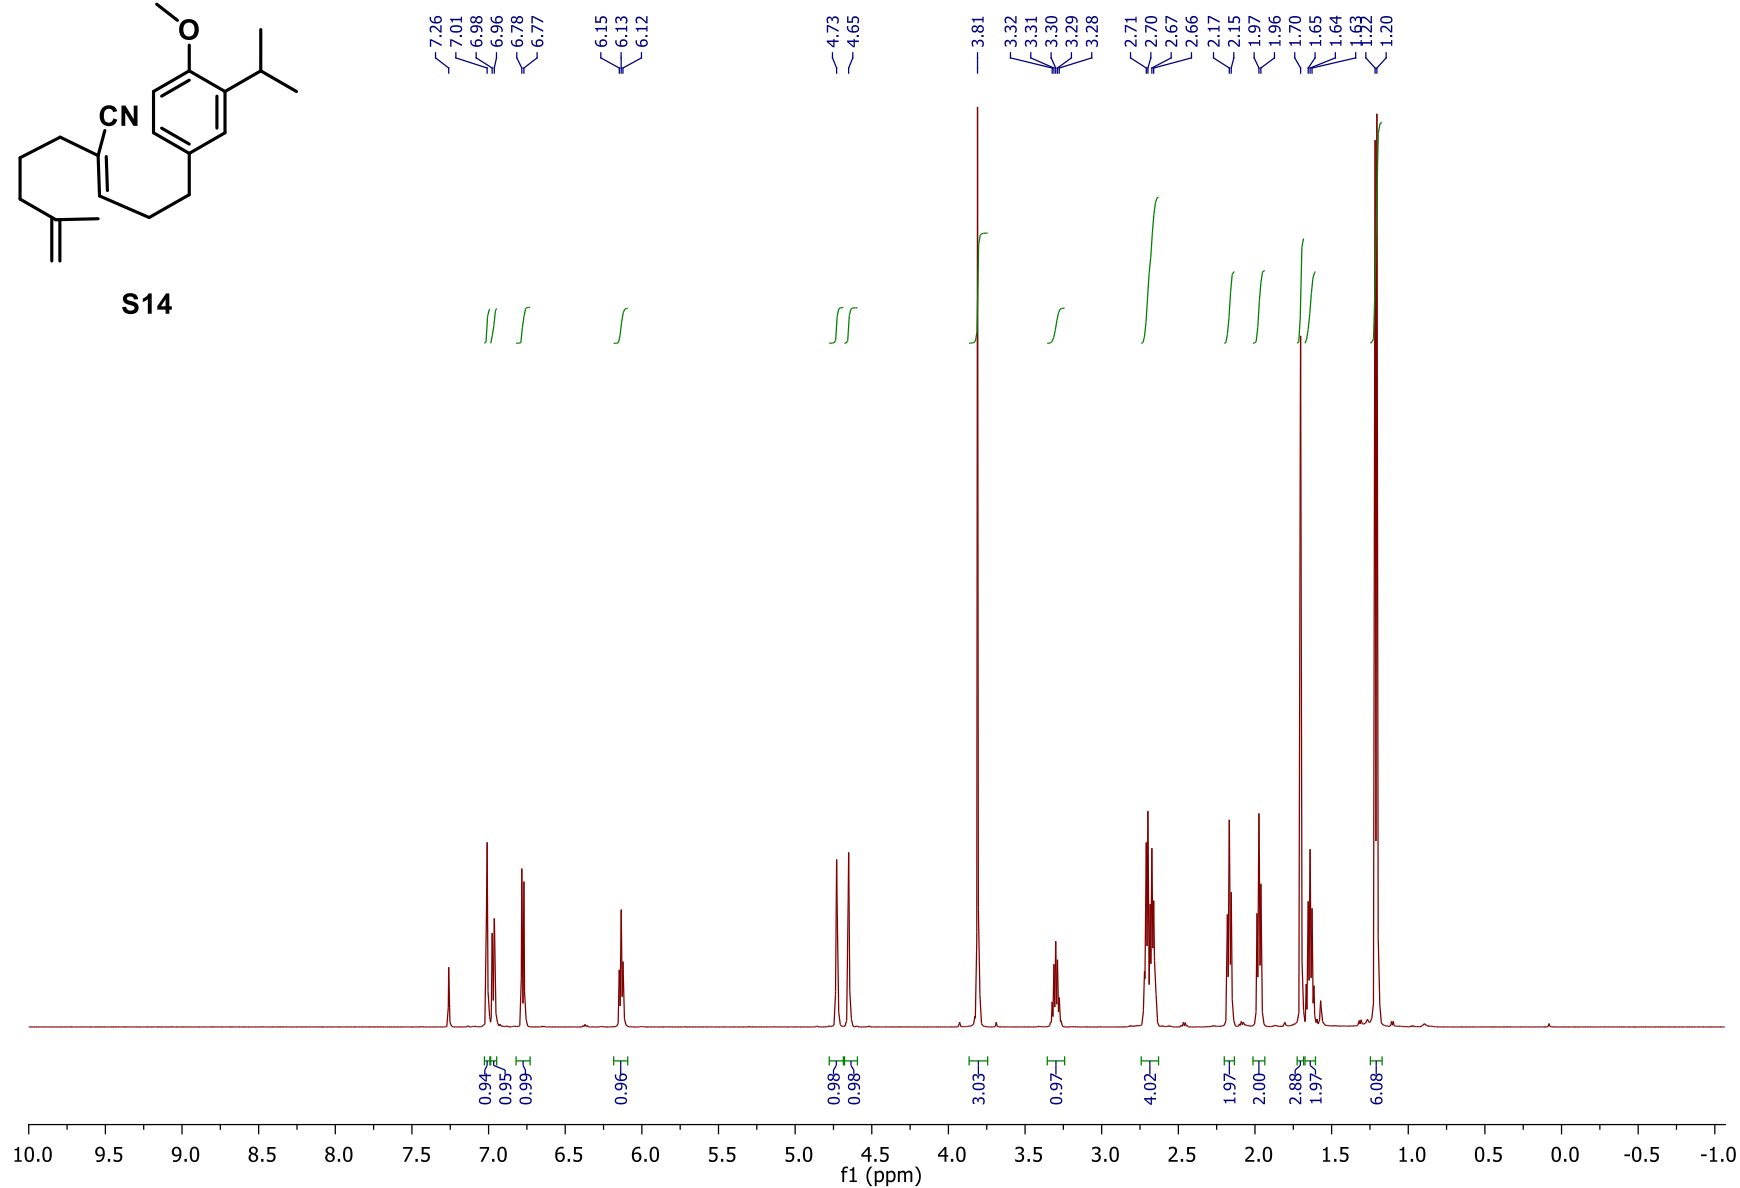

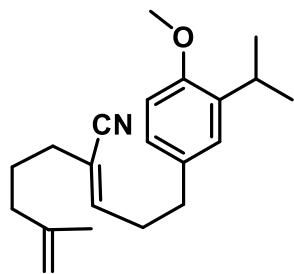

S14

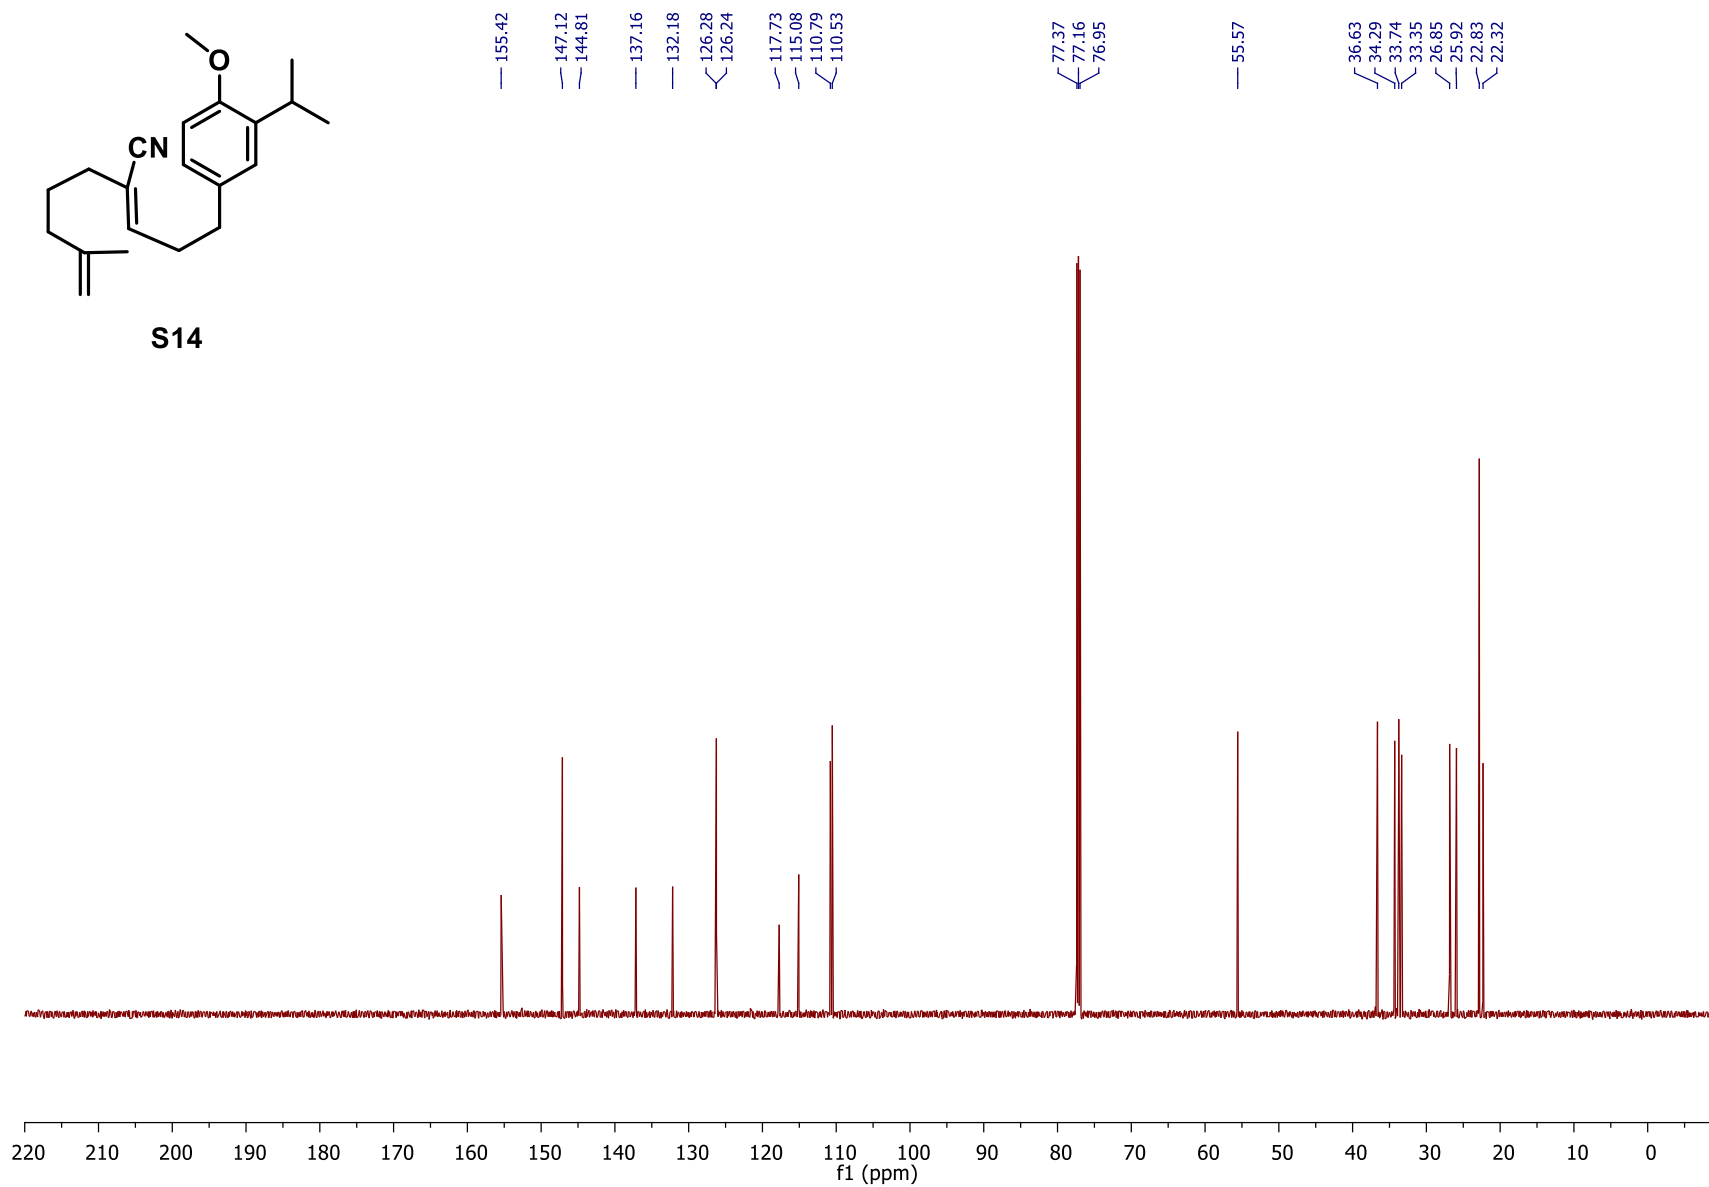

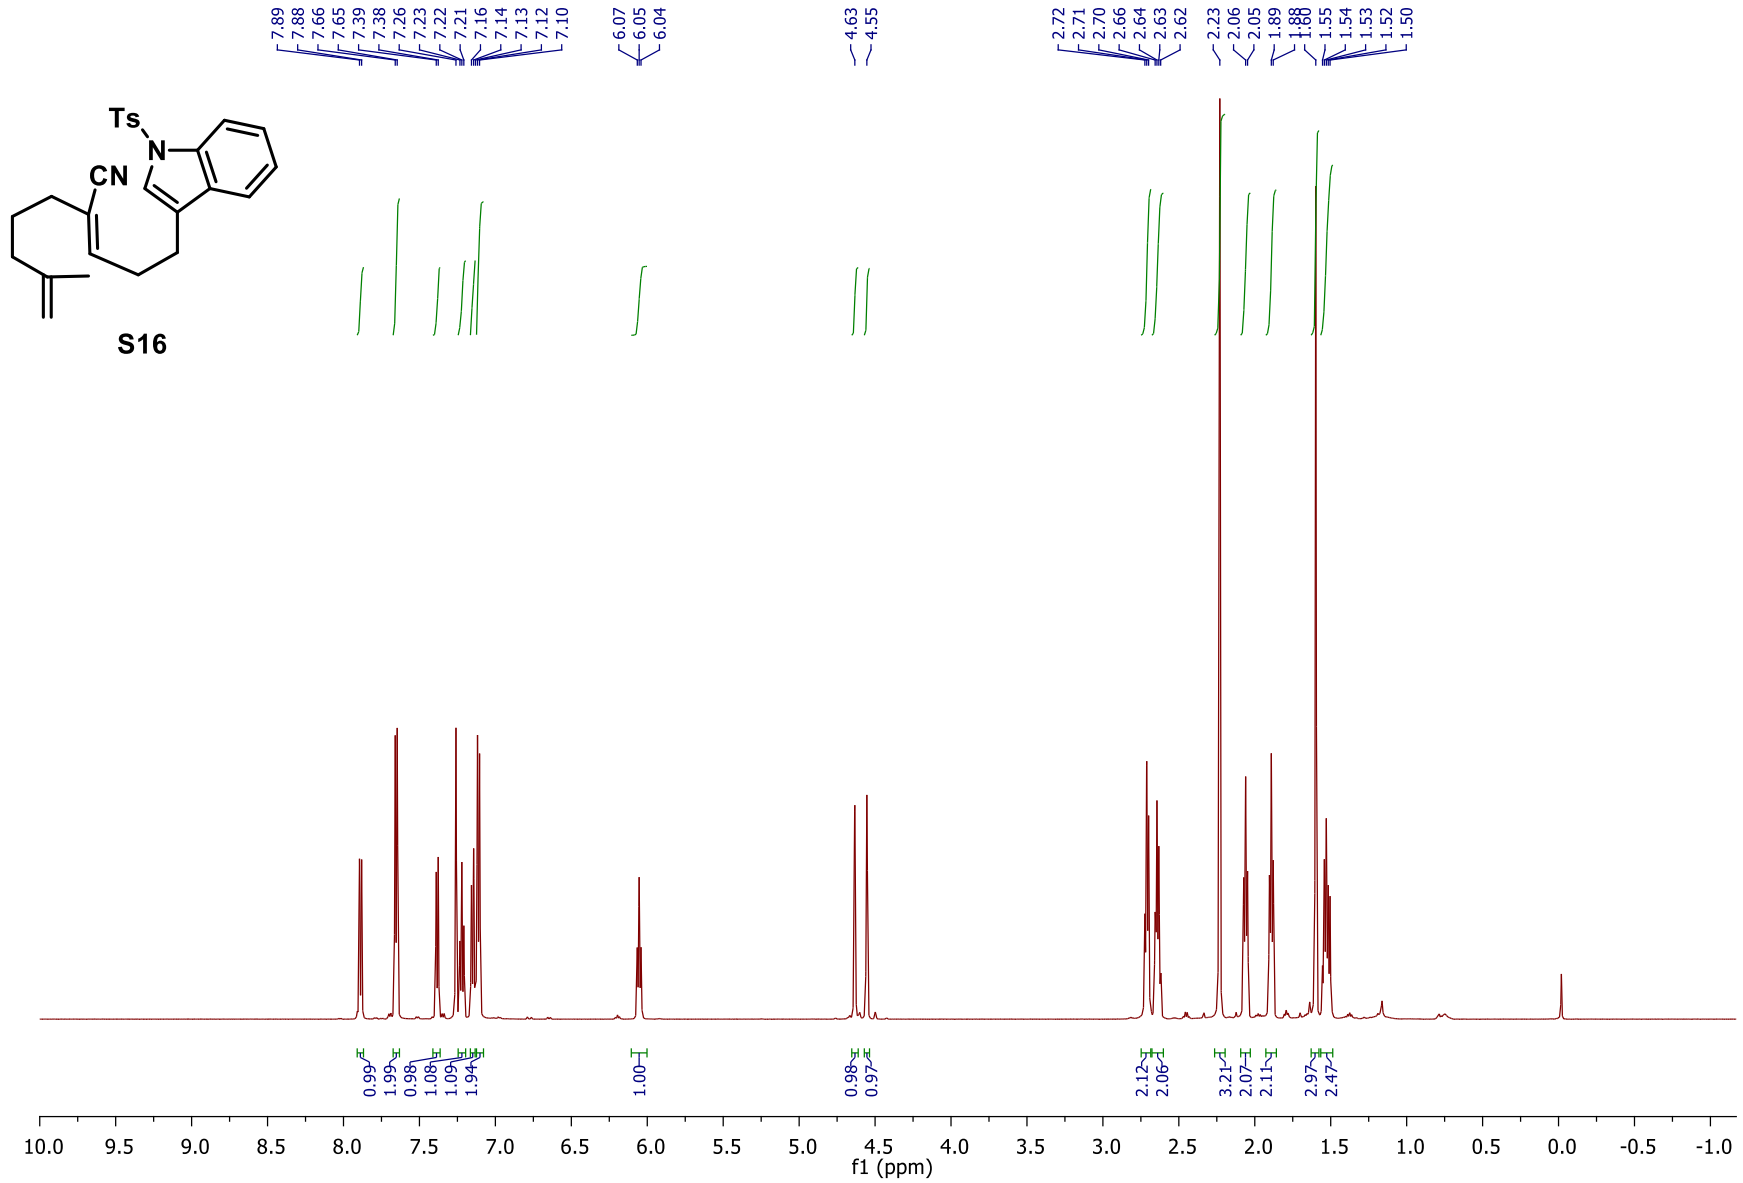

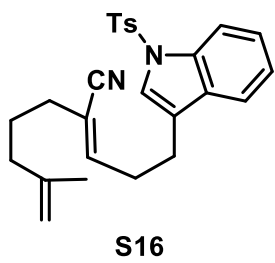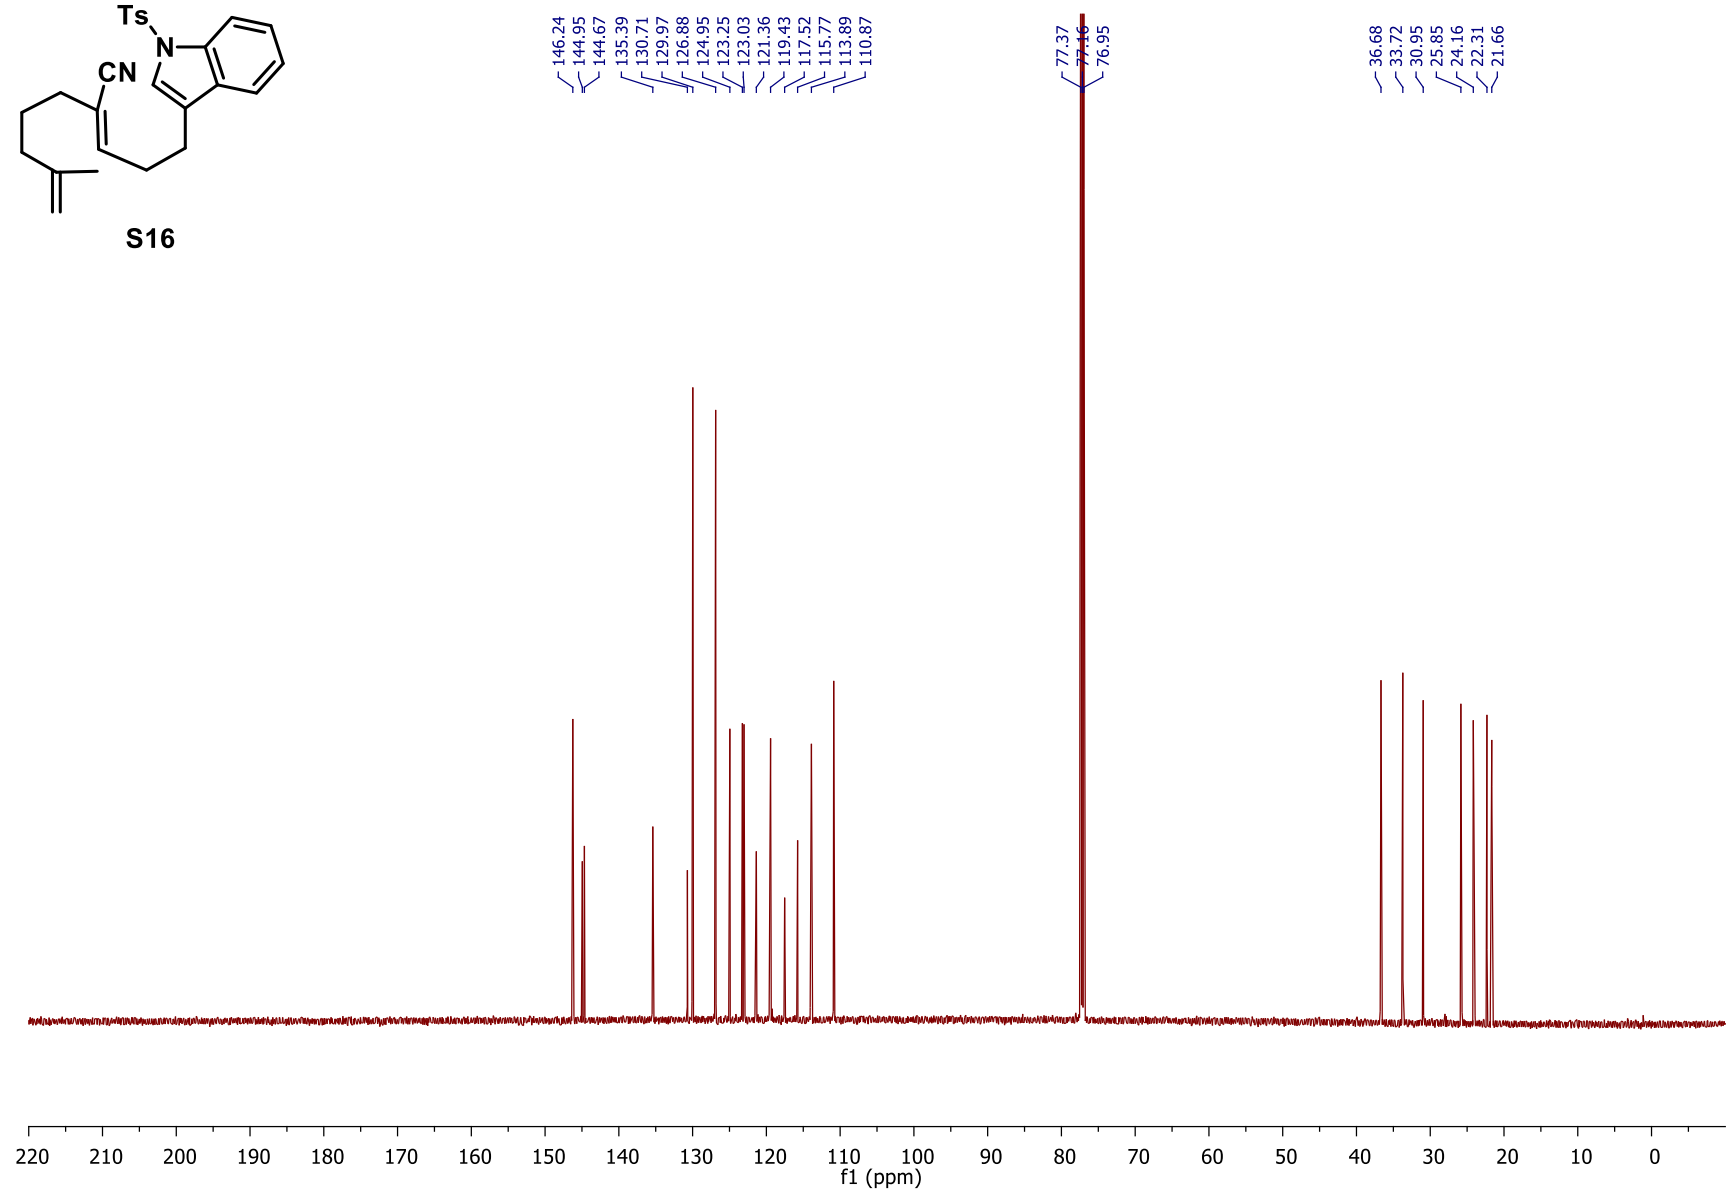

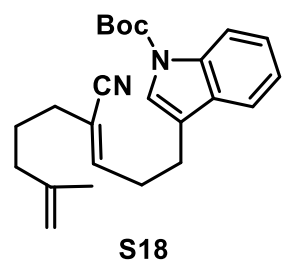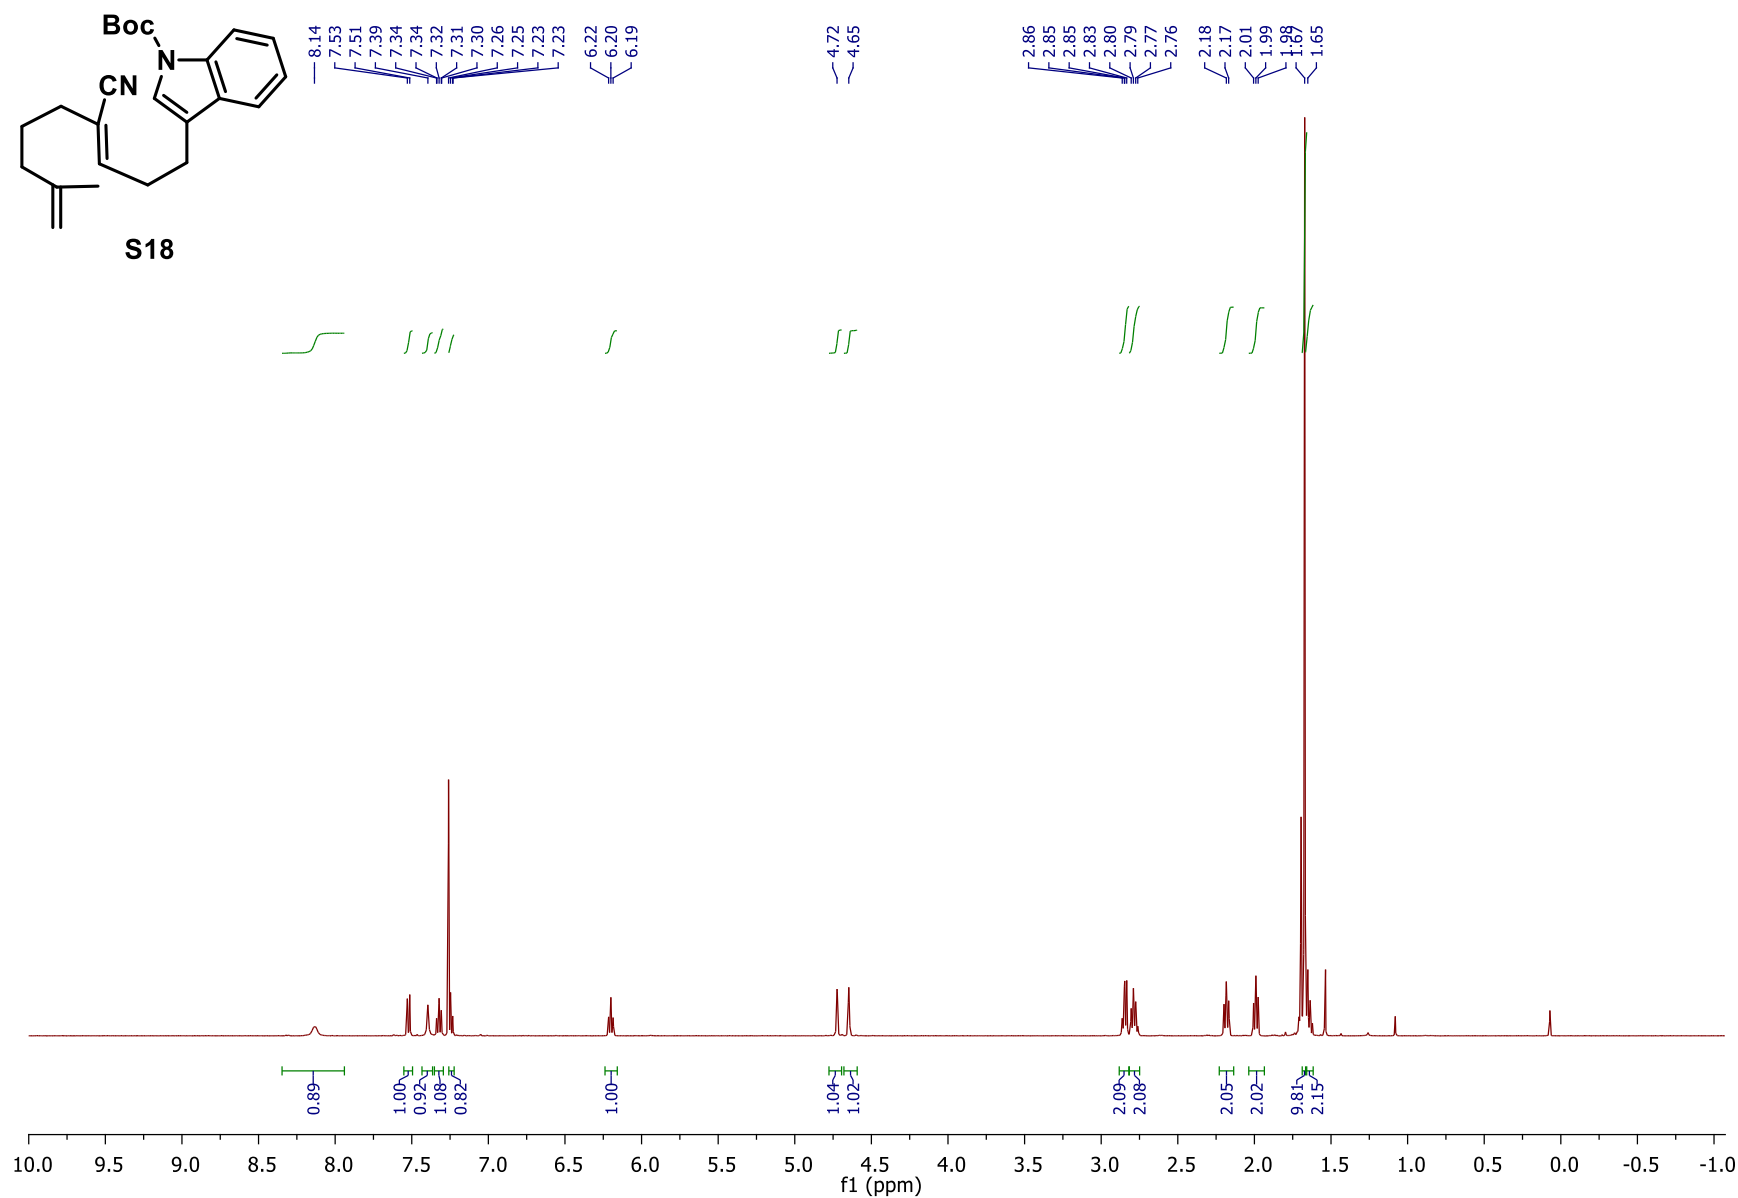

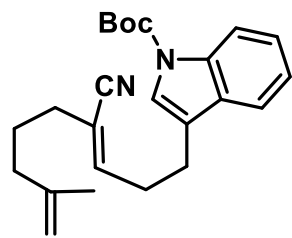

S18

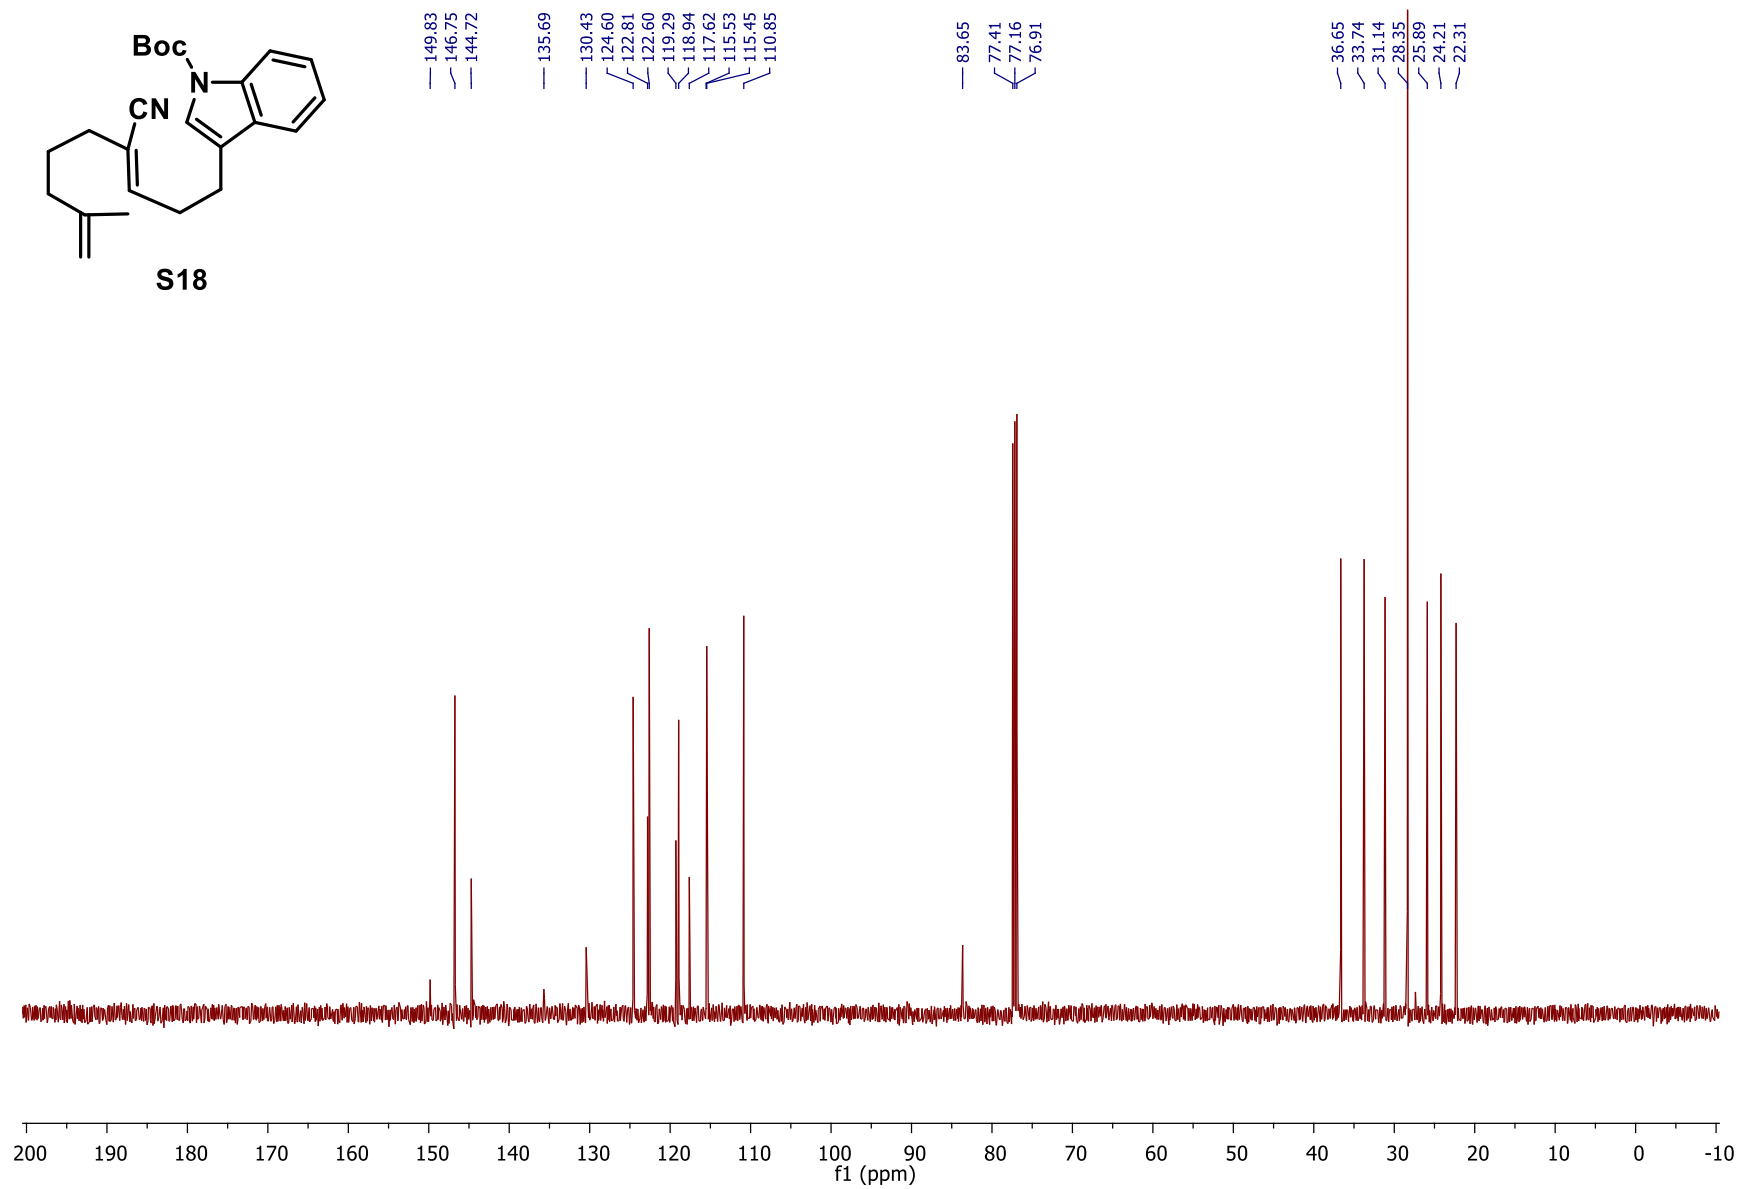

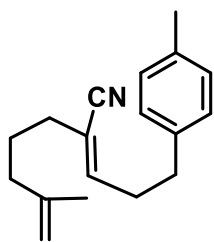

S20

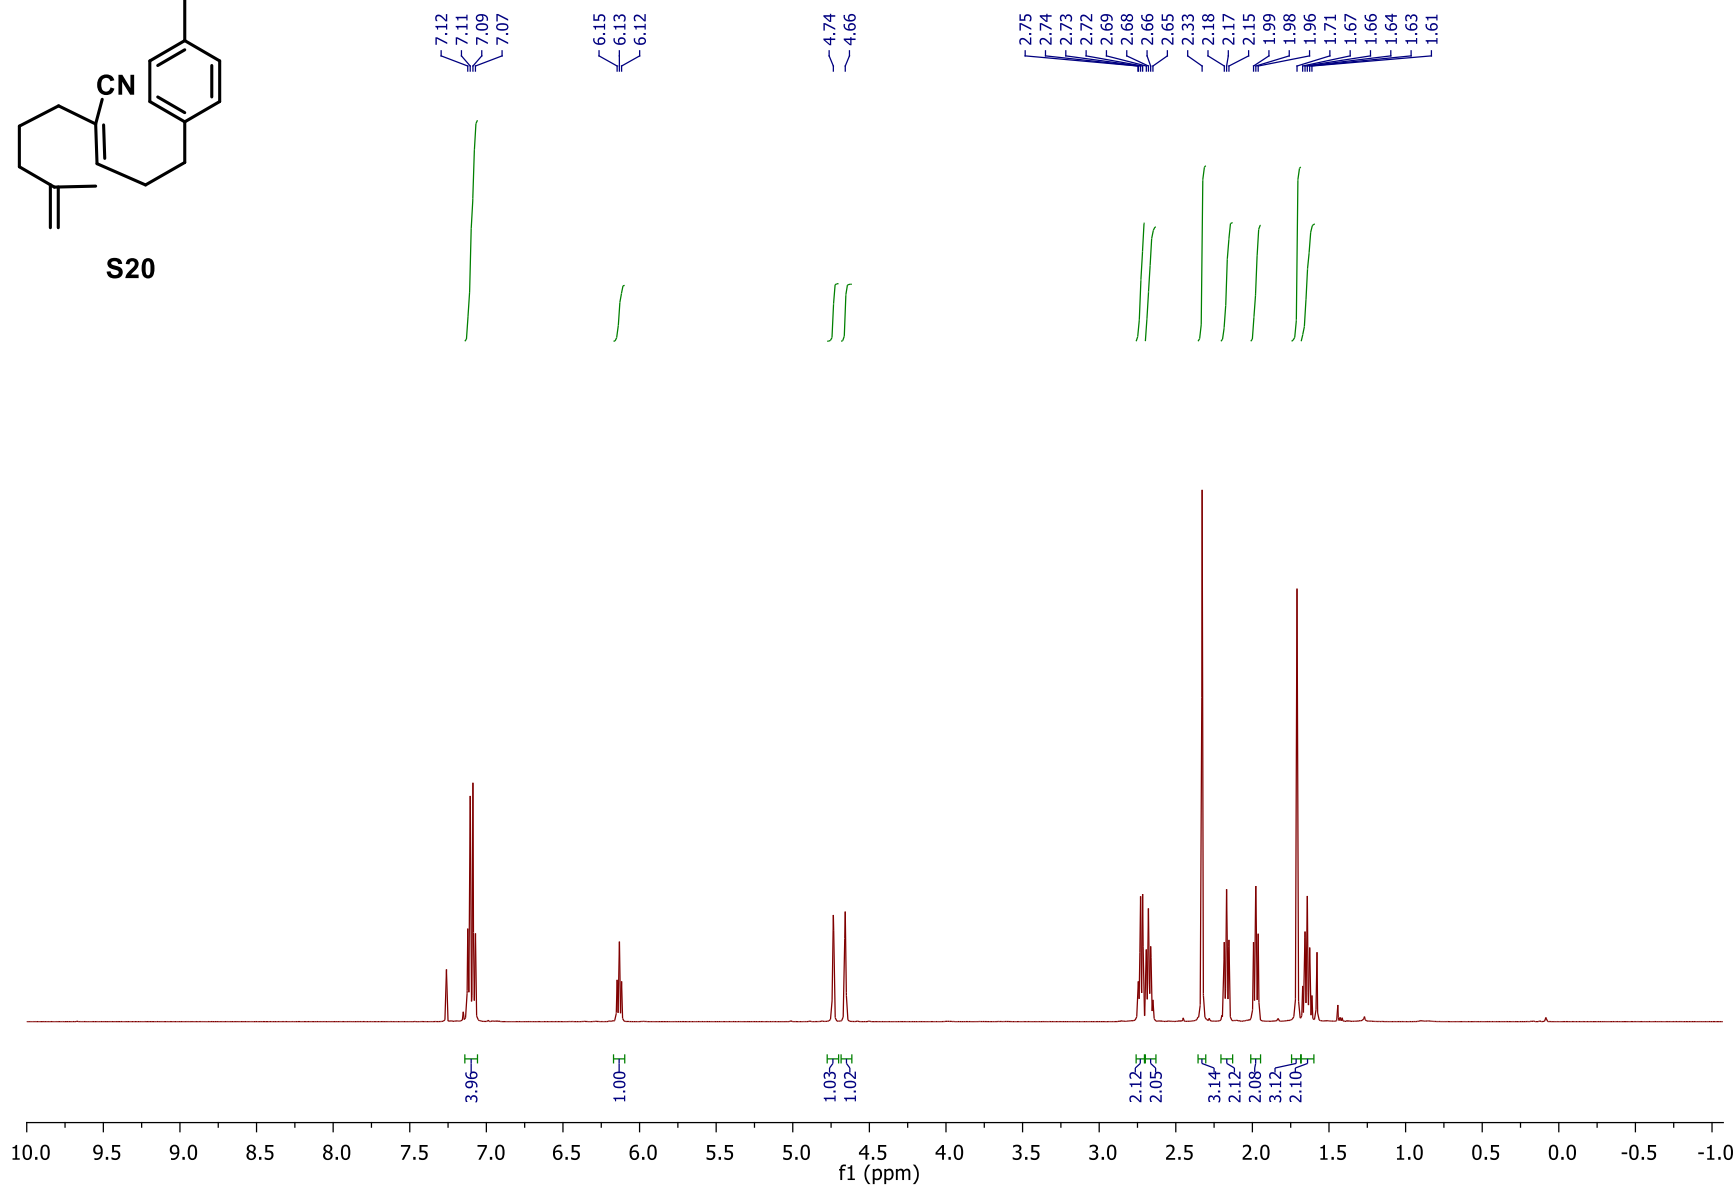



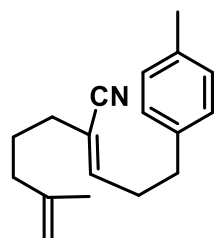

S20

- 146.86
- 144.81
- 137.24
- 135.90
- 129.32
- 128.41
- 117.66
- 115.26
- 110.77
- 77.41
- 77.16
- 76.91
- 36.61
- 34.48
- 33.73
- 33.18
- 25.90
- 22.32
- 21.12

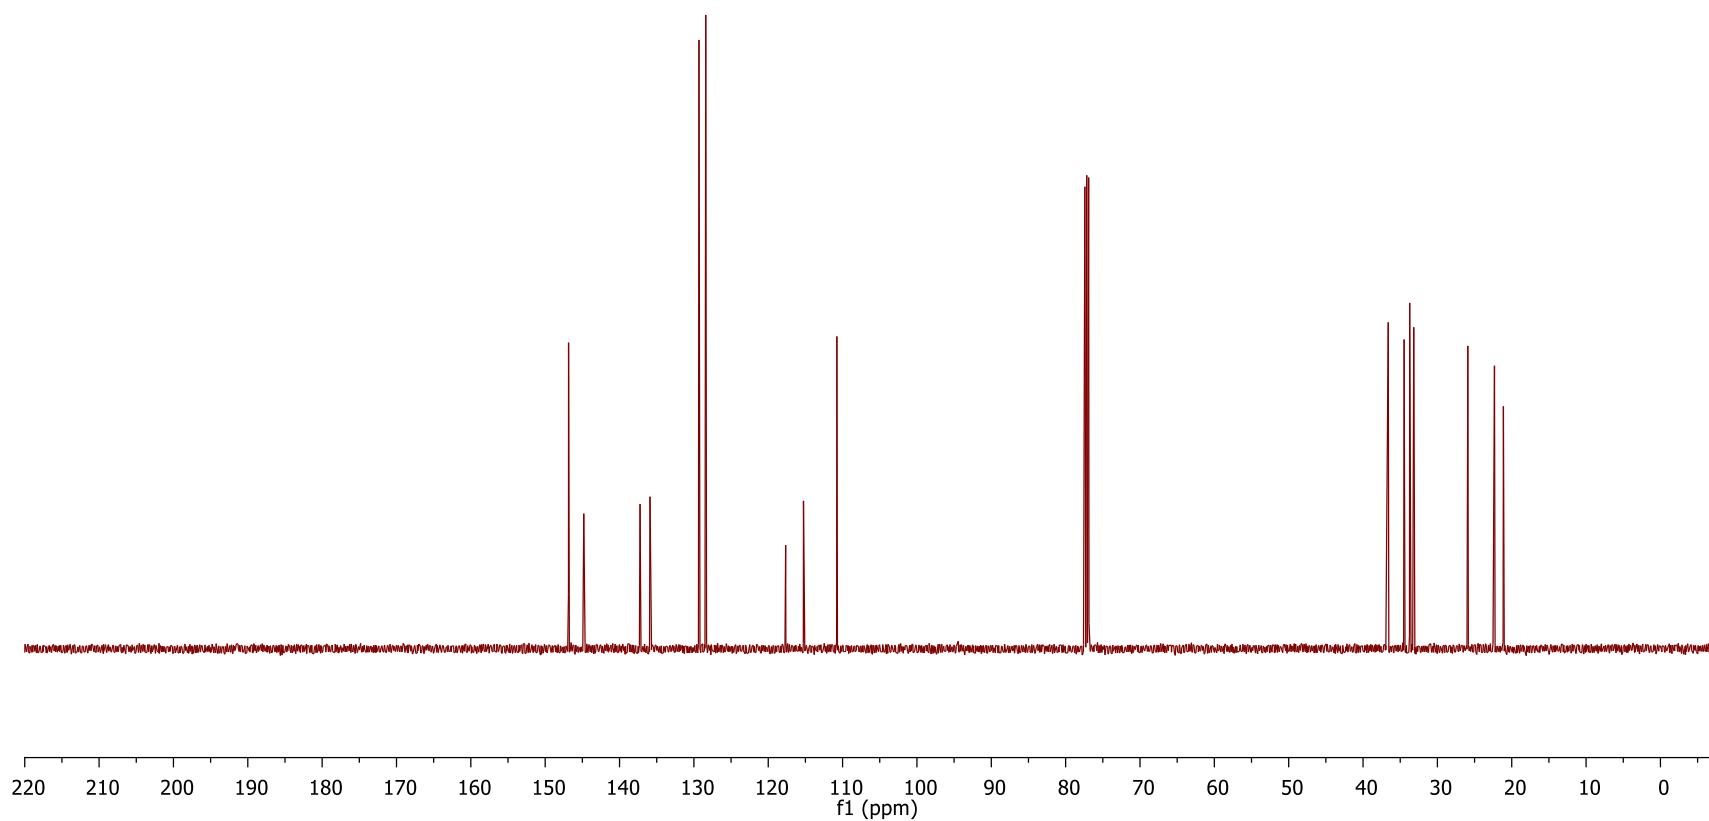

S109

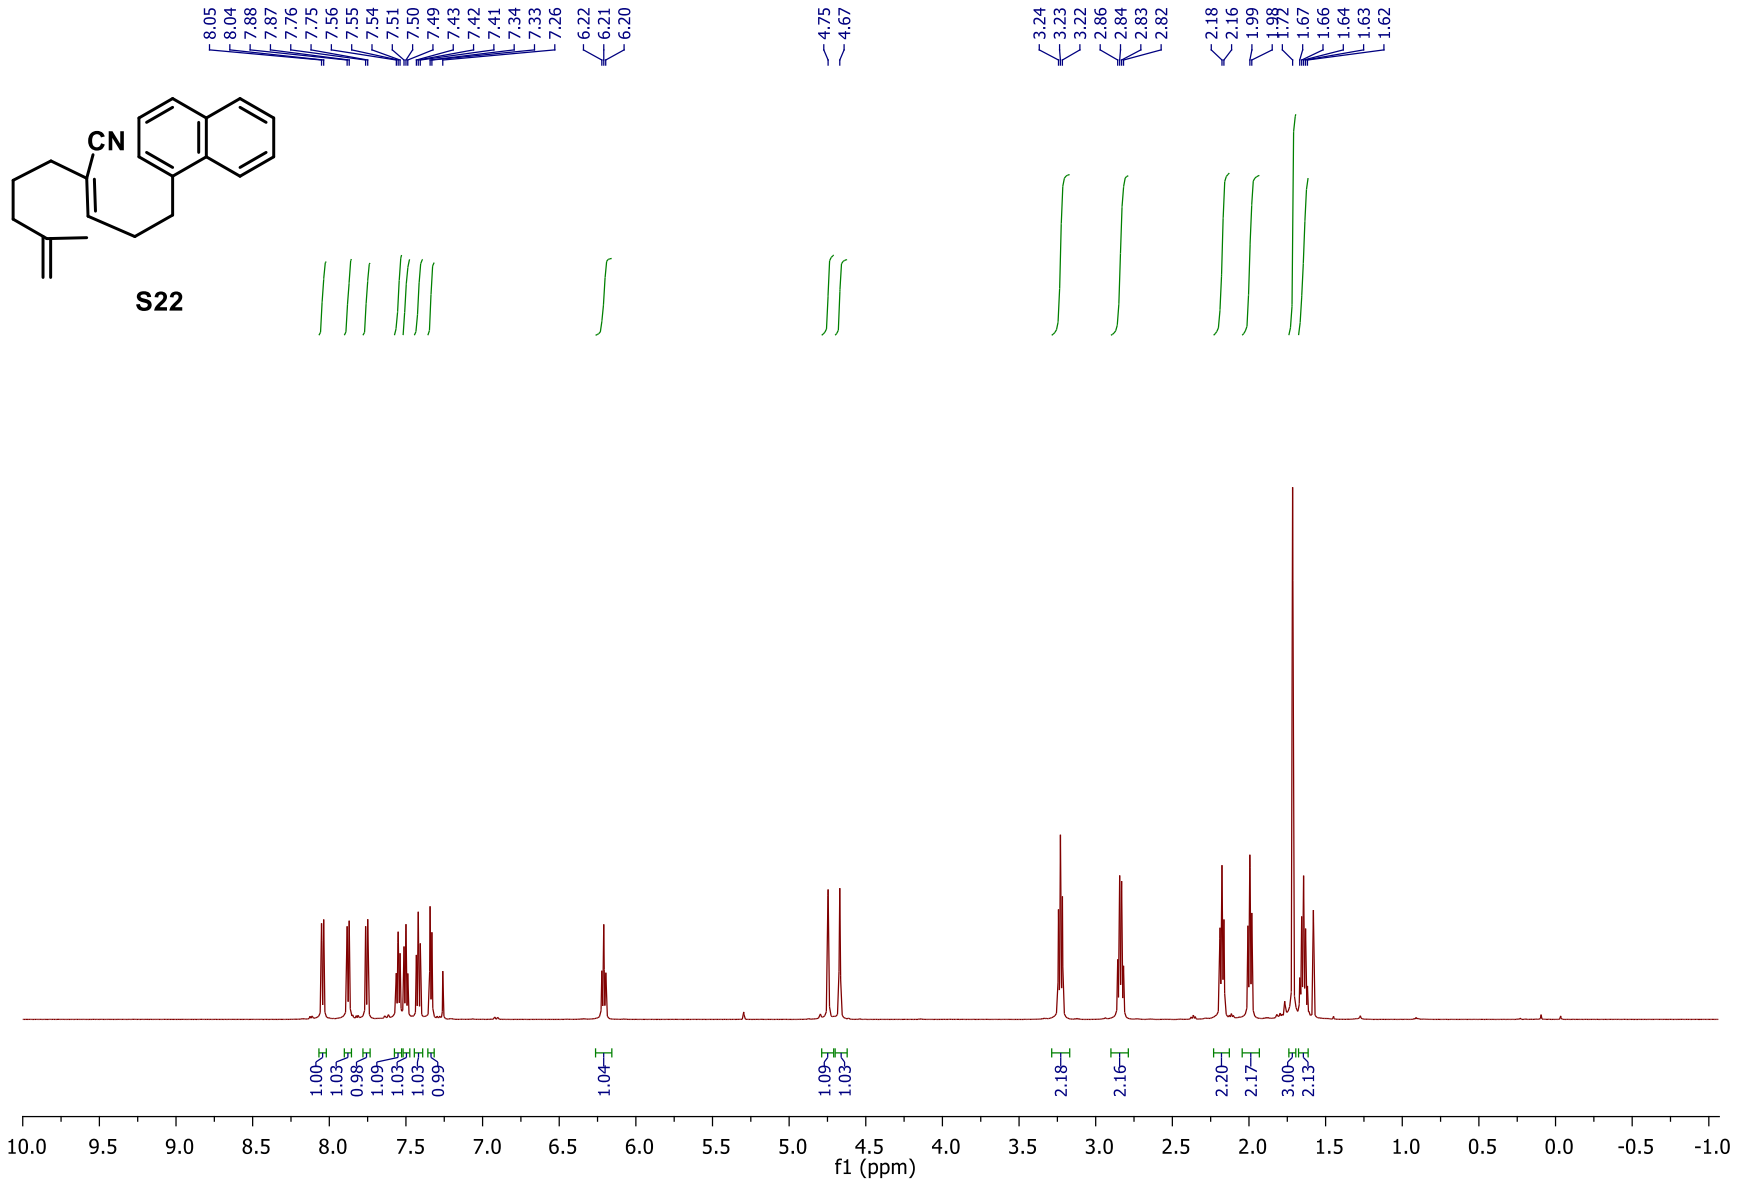

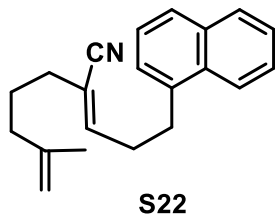

146.69  
144.78  
136.39  
129.01  
127.32  
126.29  
126.21  
125.77  
125.60  
117.88  
115.38  
110.81

36.67  
33.75  
32.41  
31.98  
25.89  
22.34

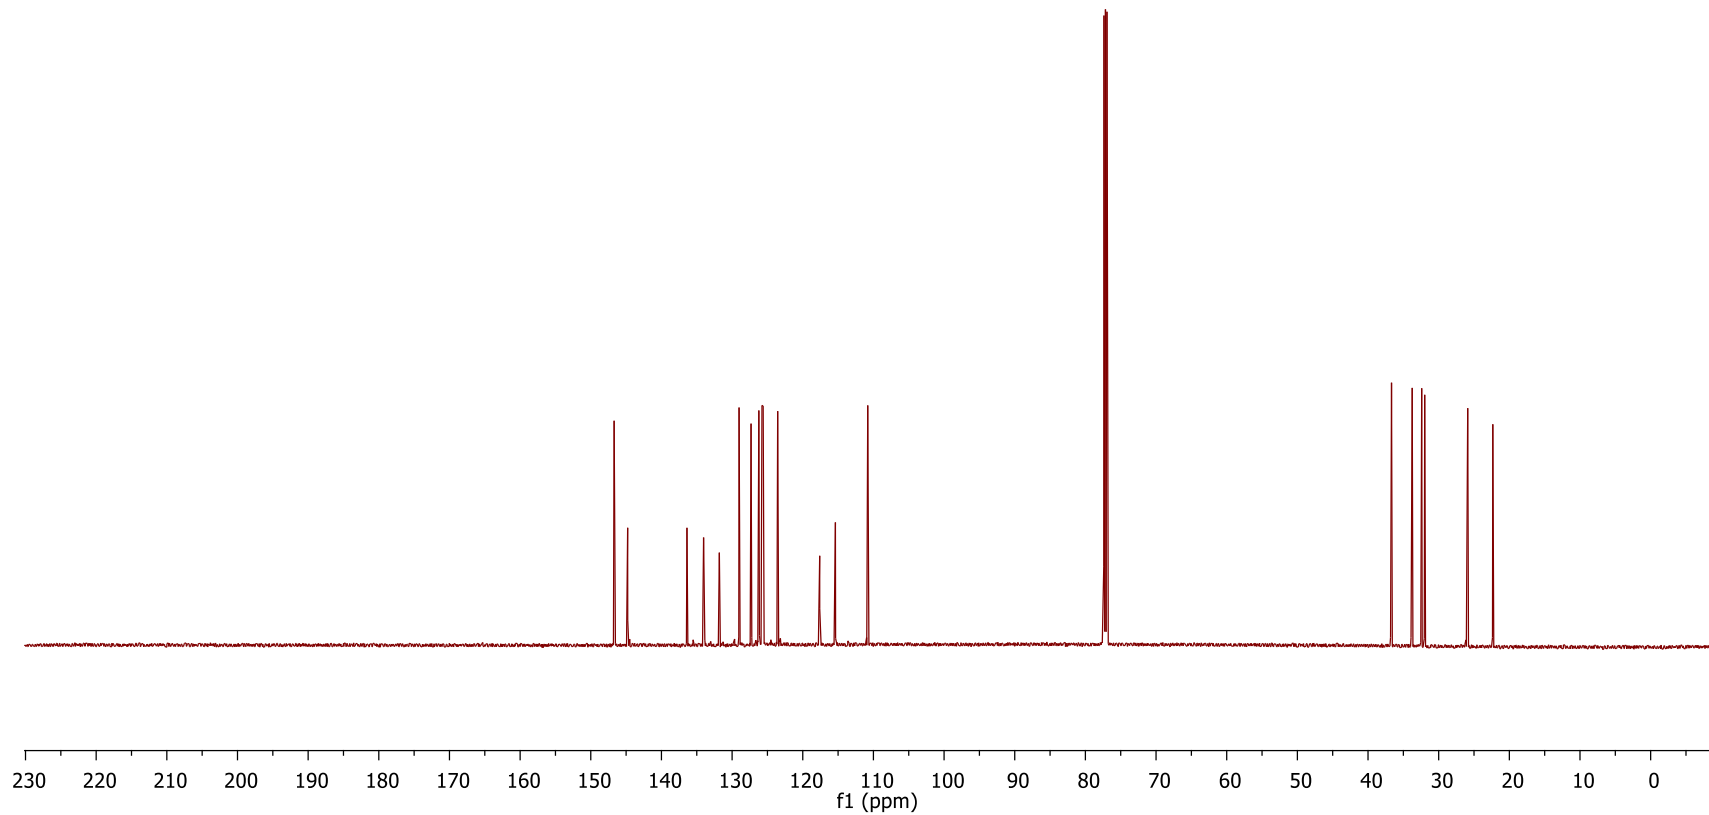

S111

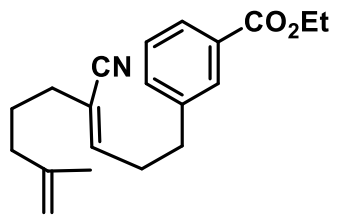

S24

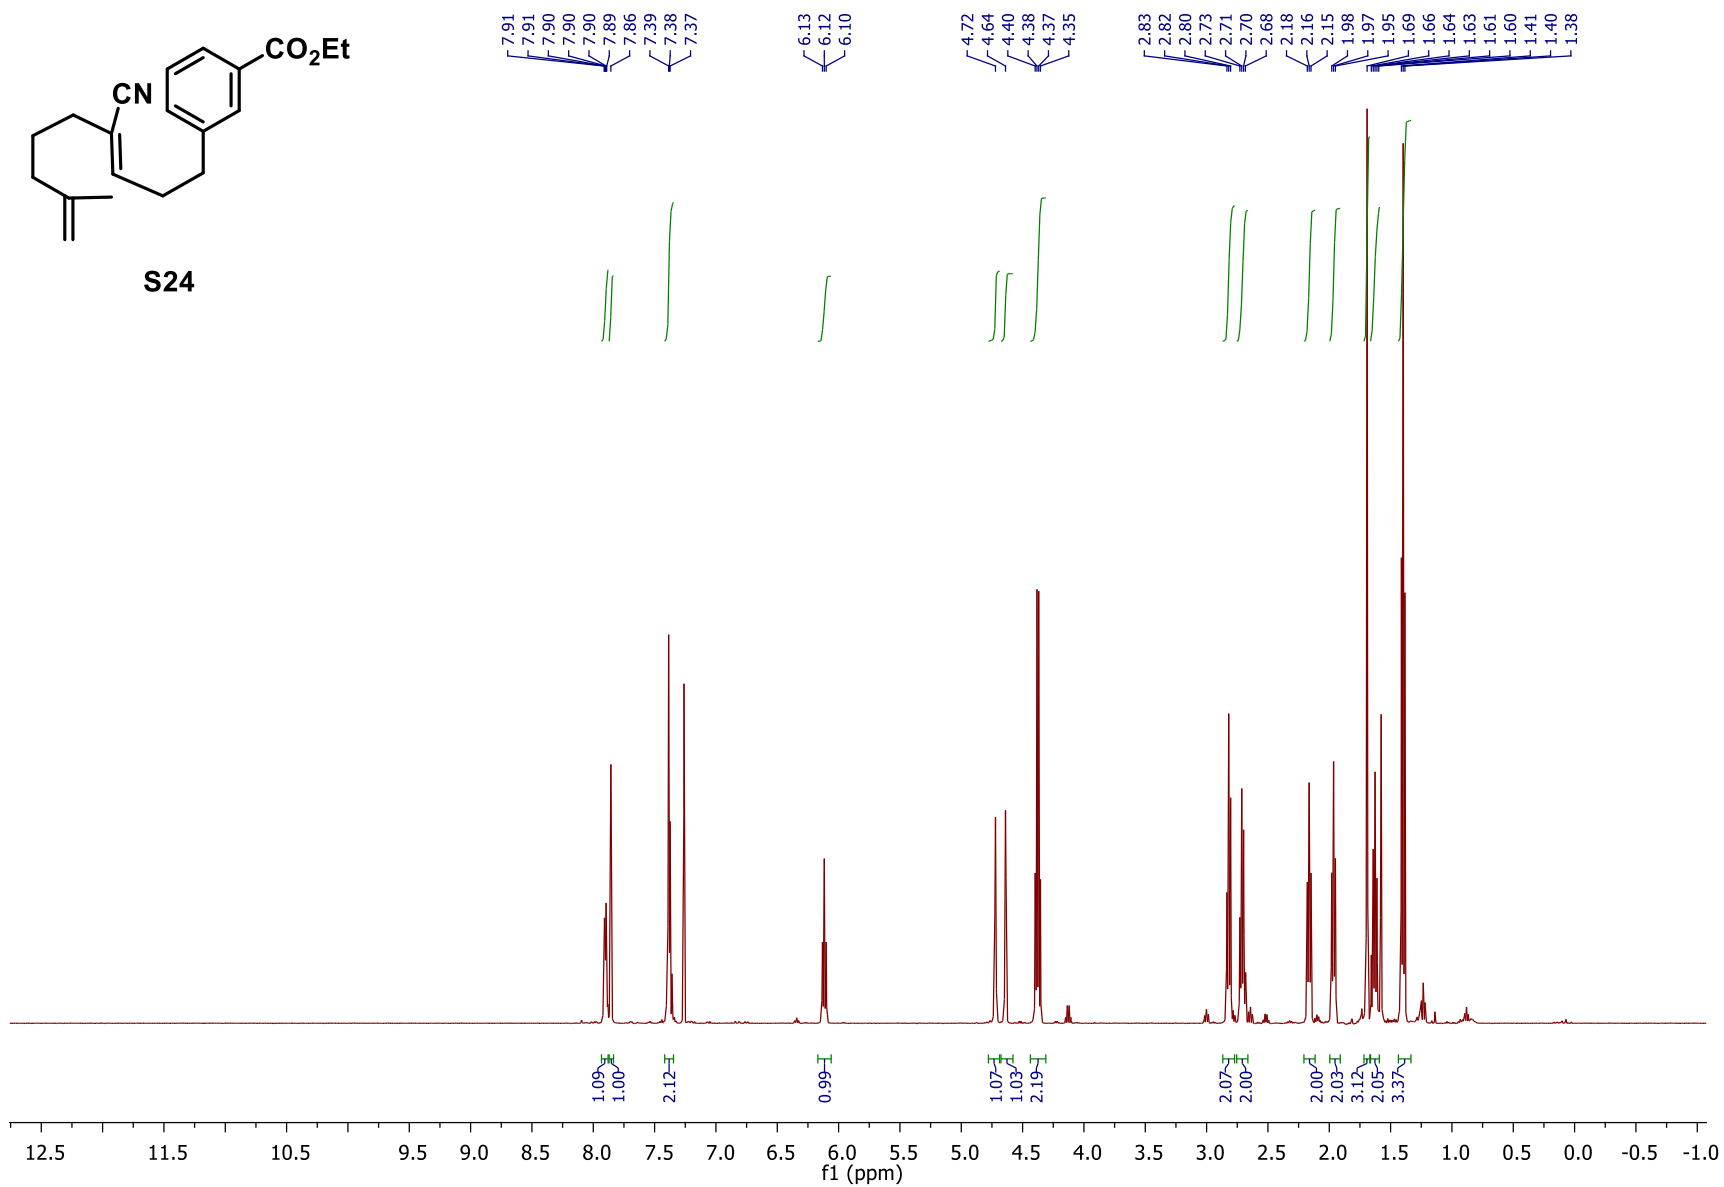

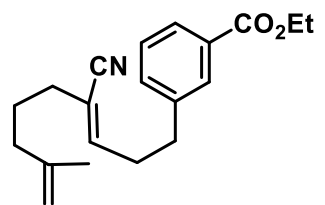

S24

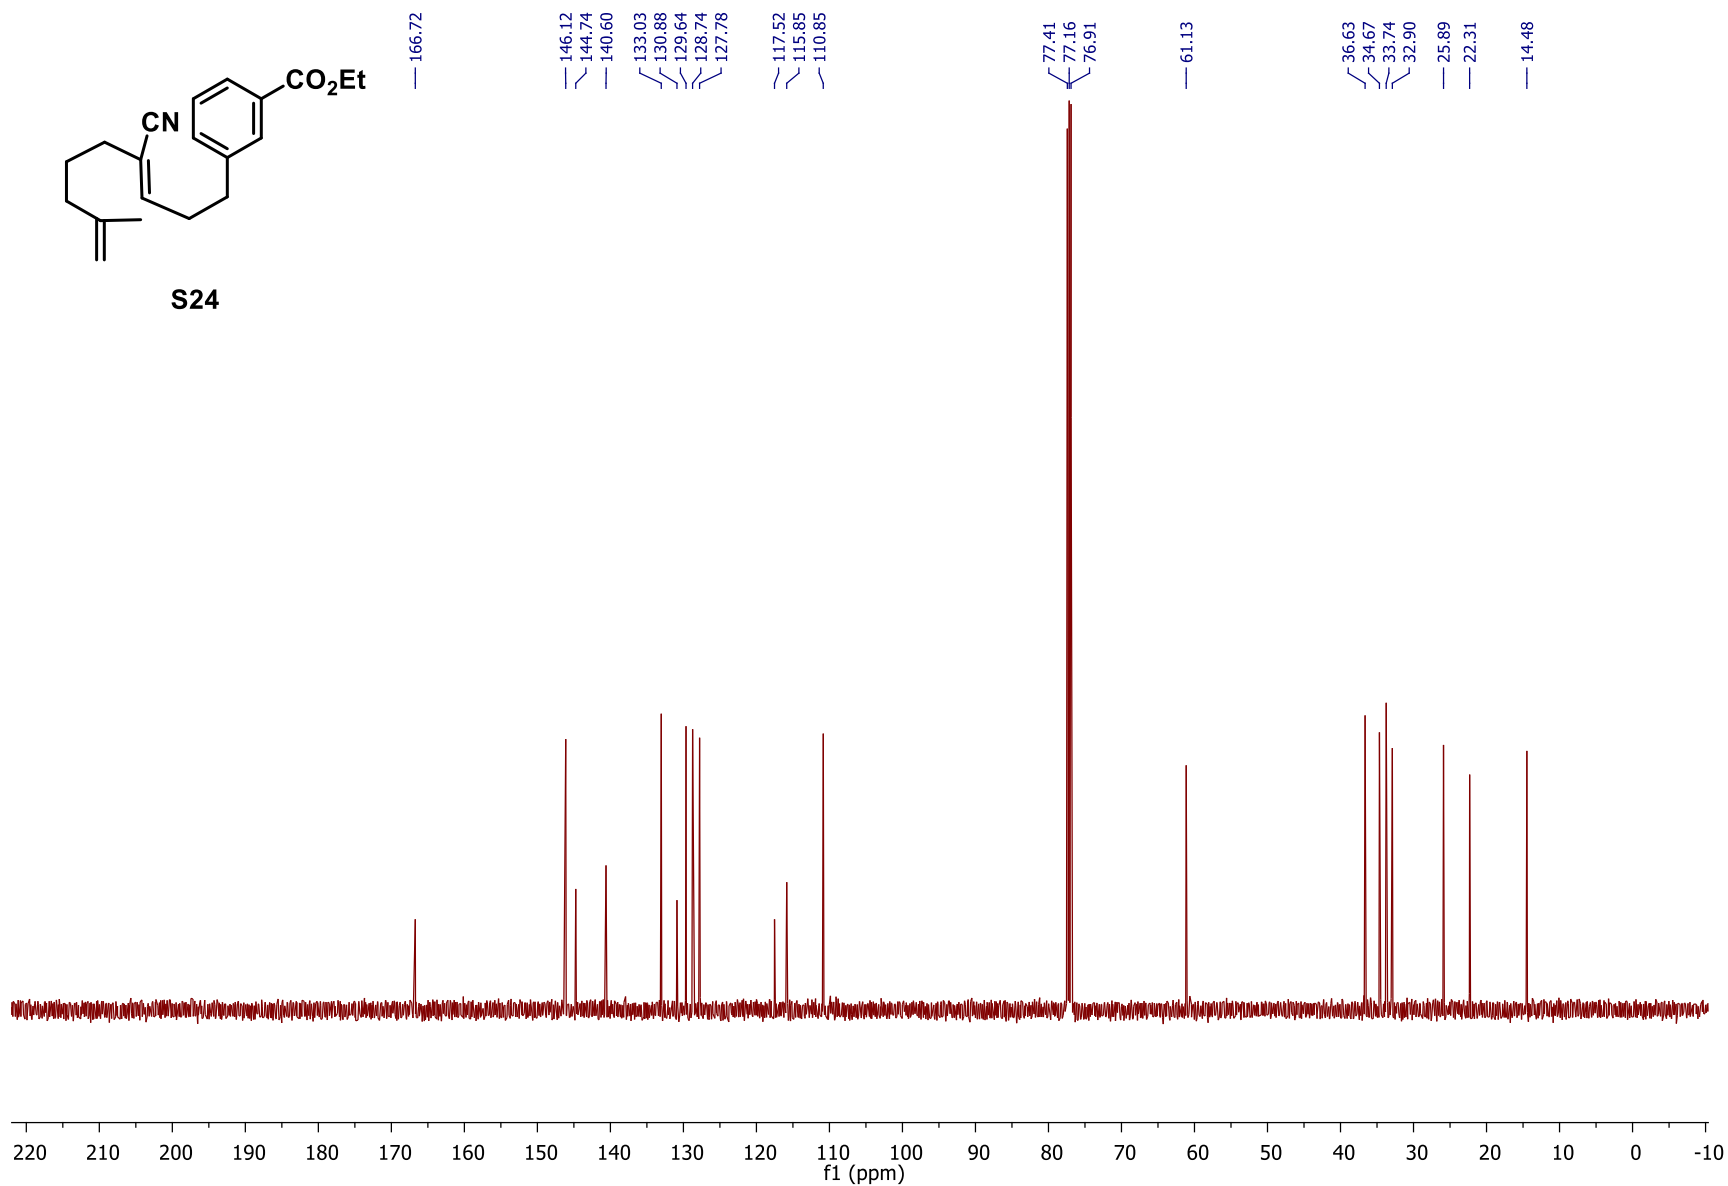

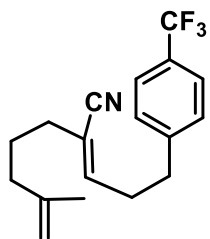

S26

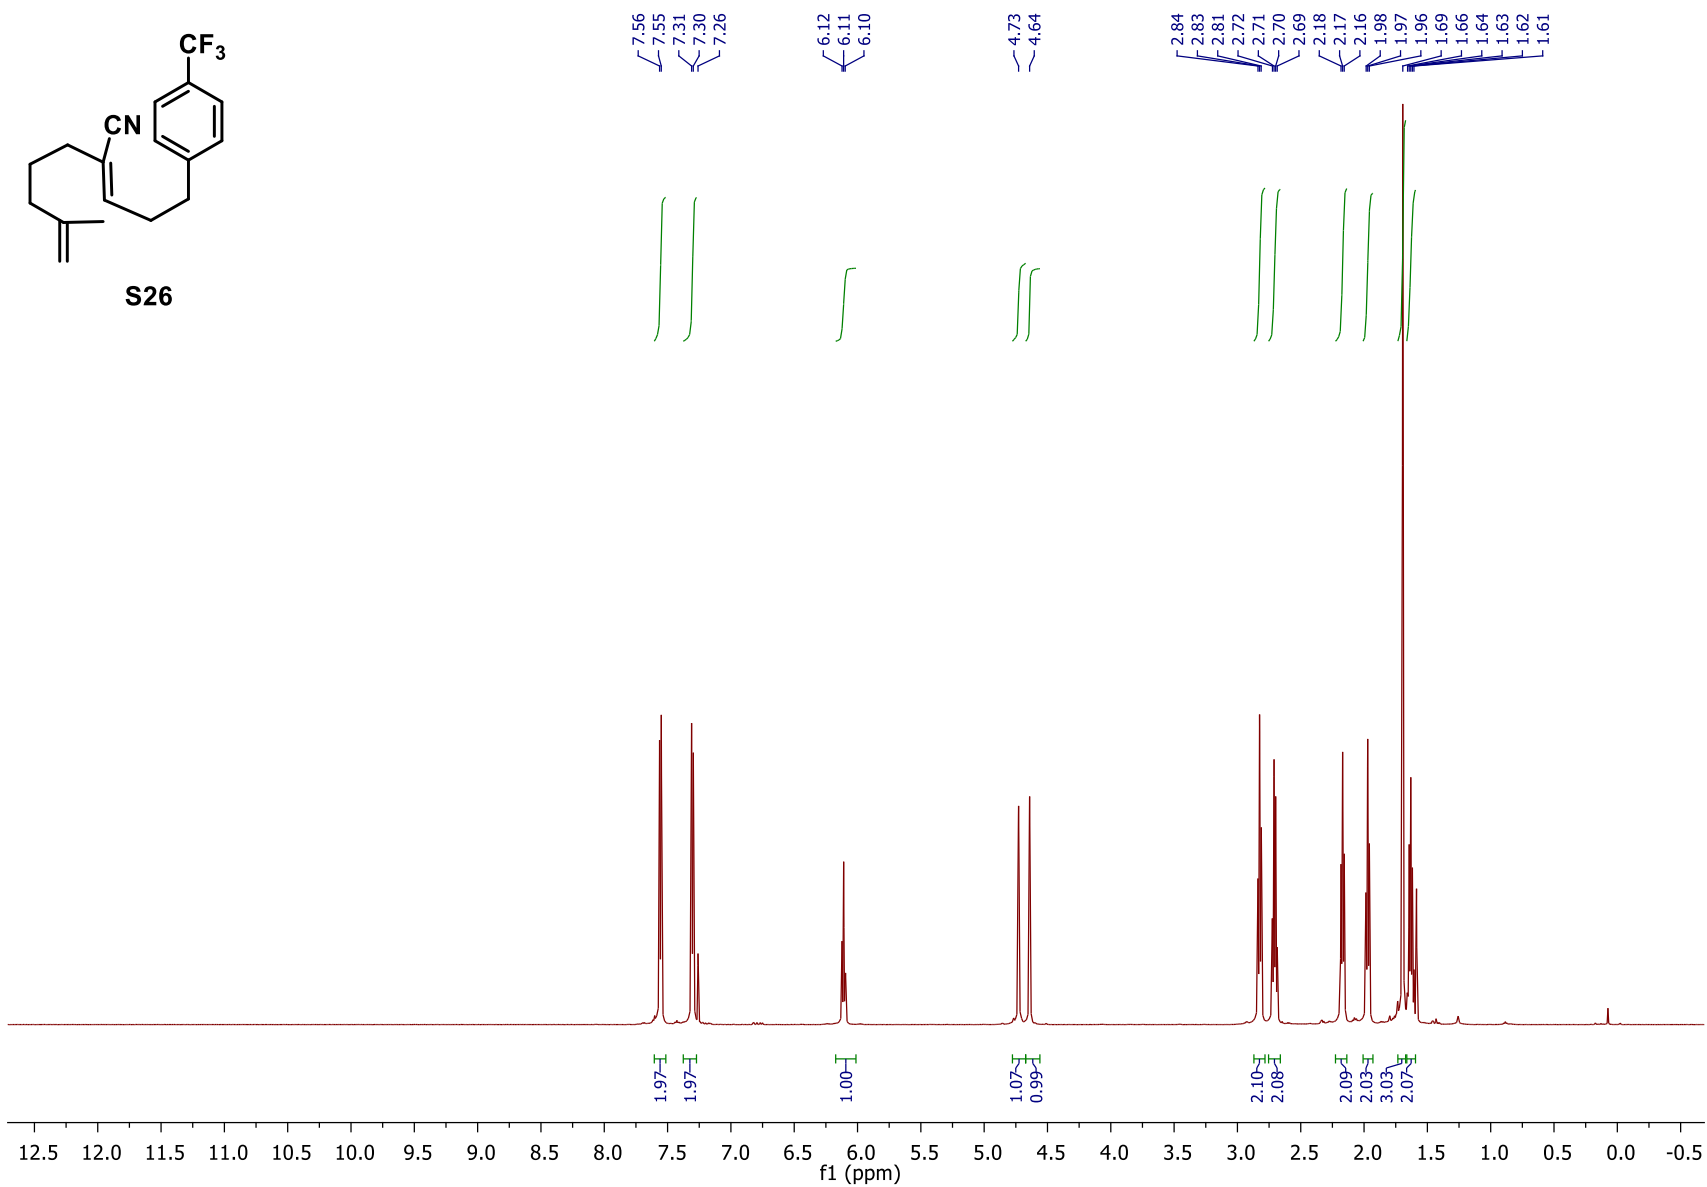

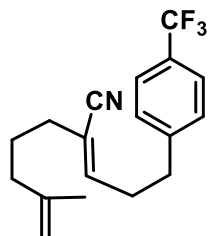

S26

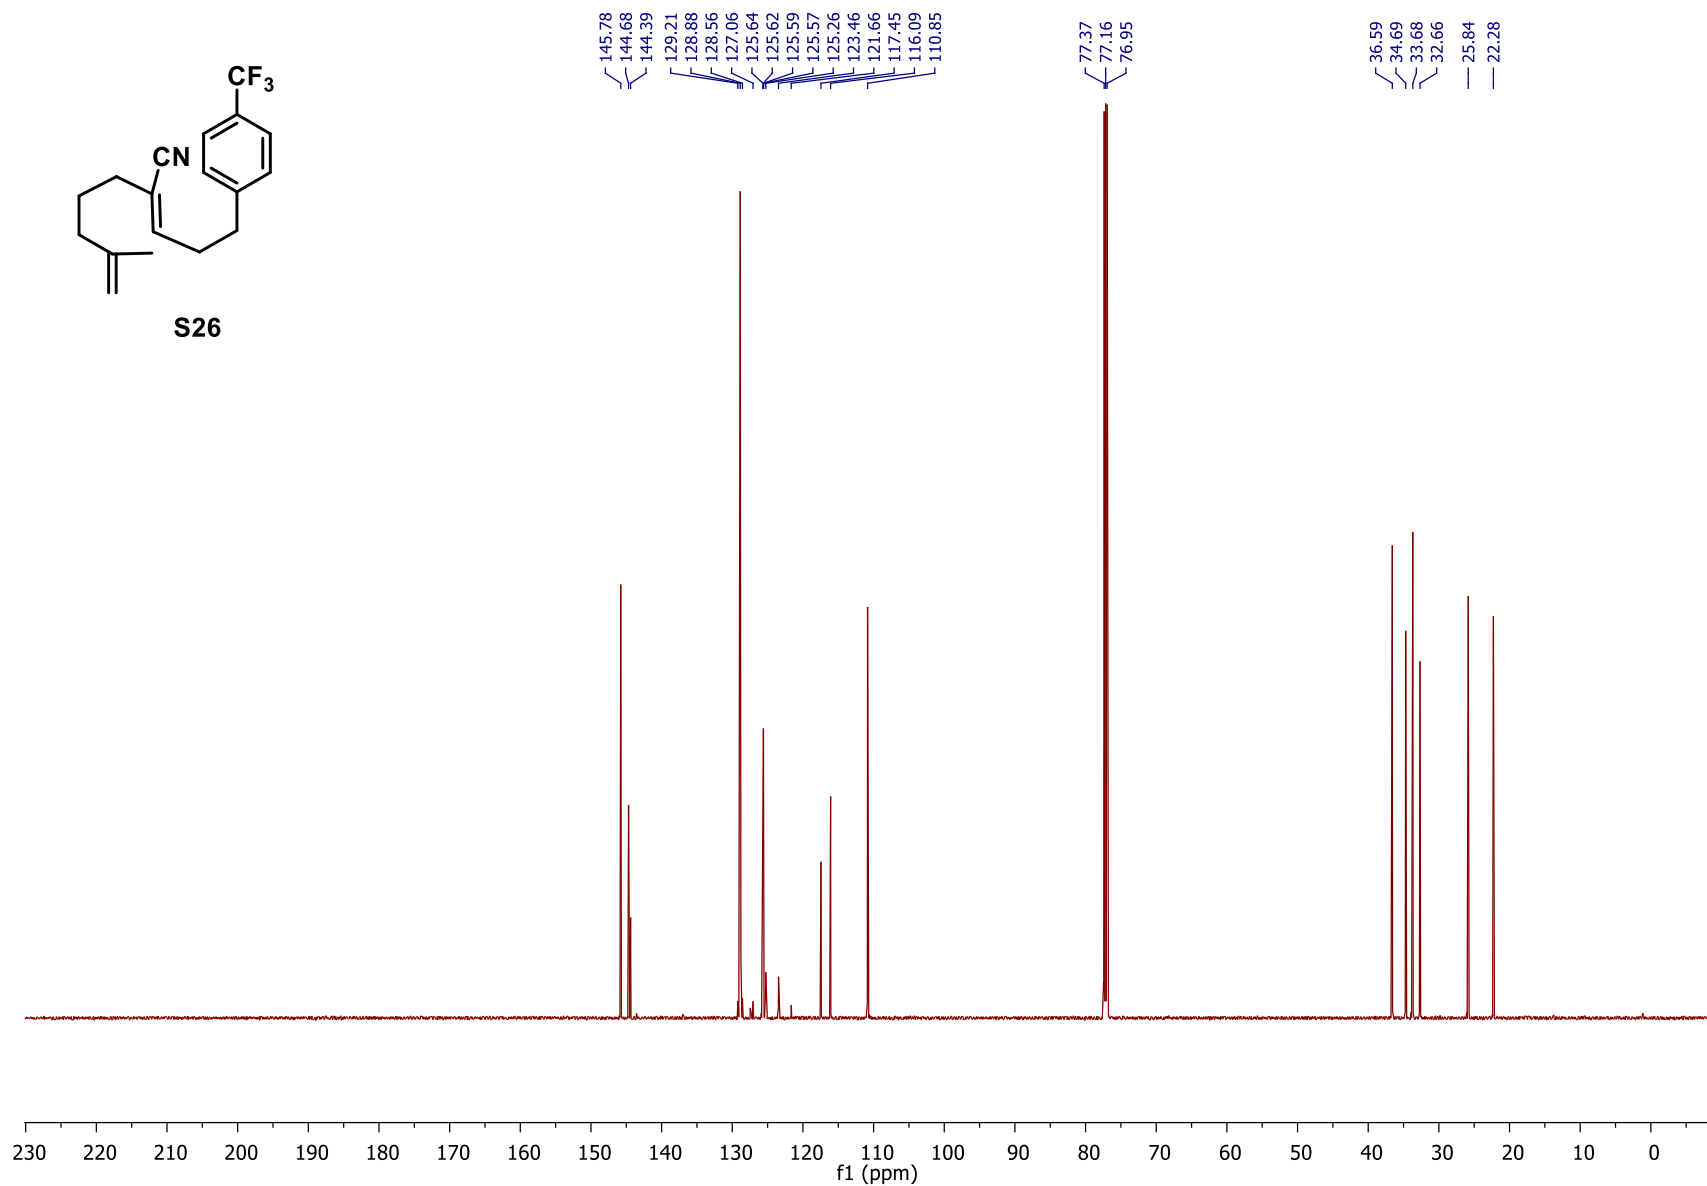

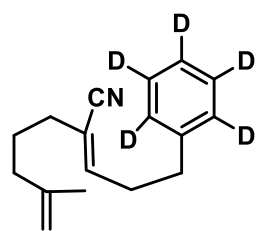

28

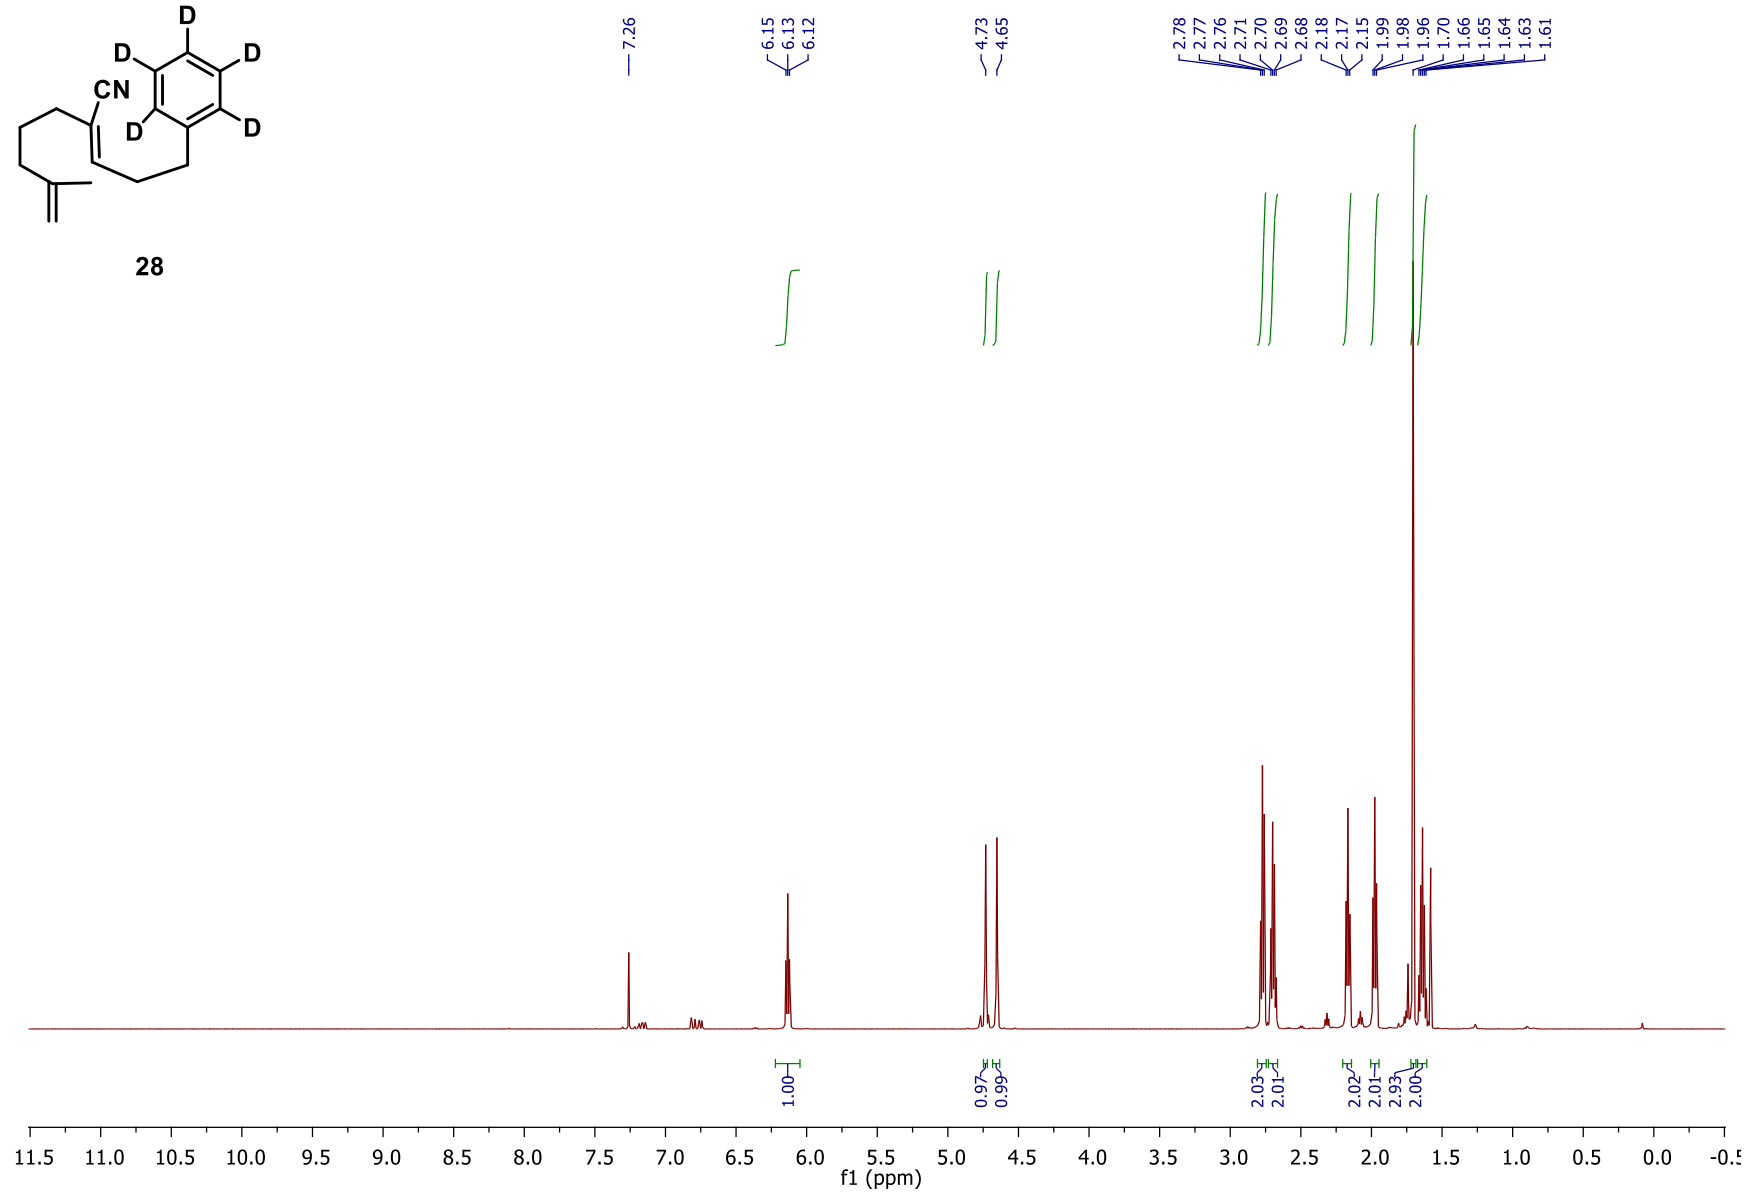



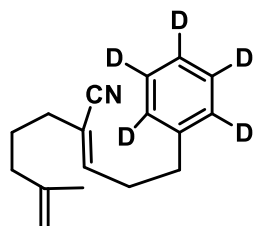

28

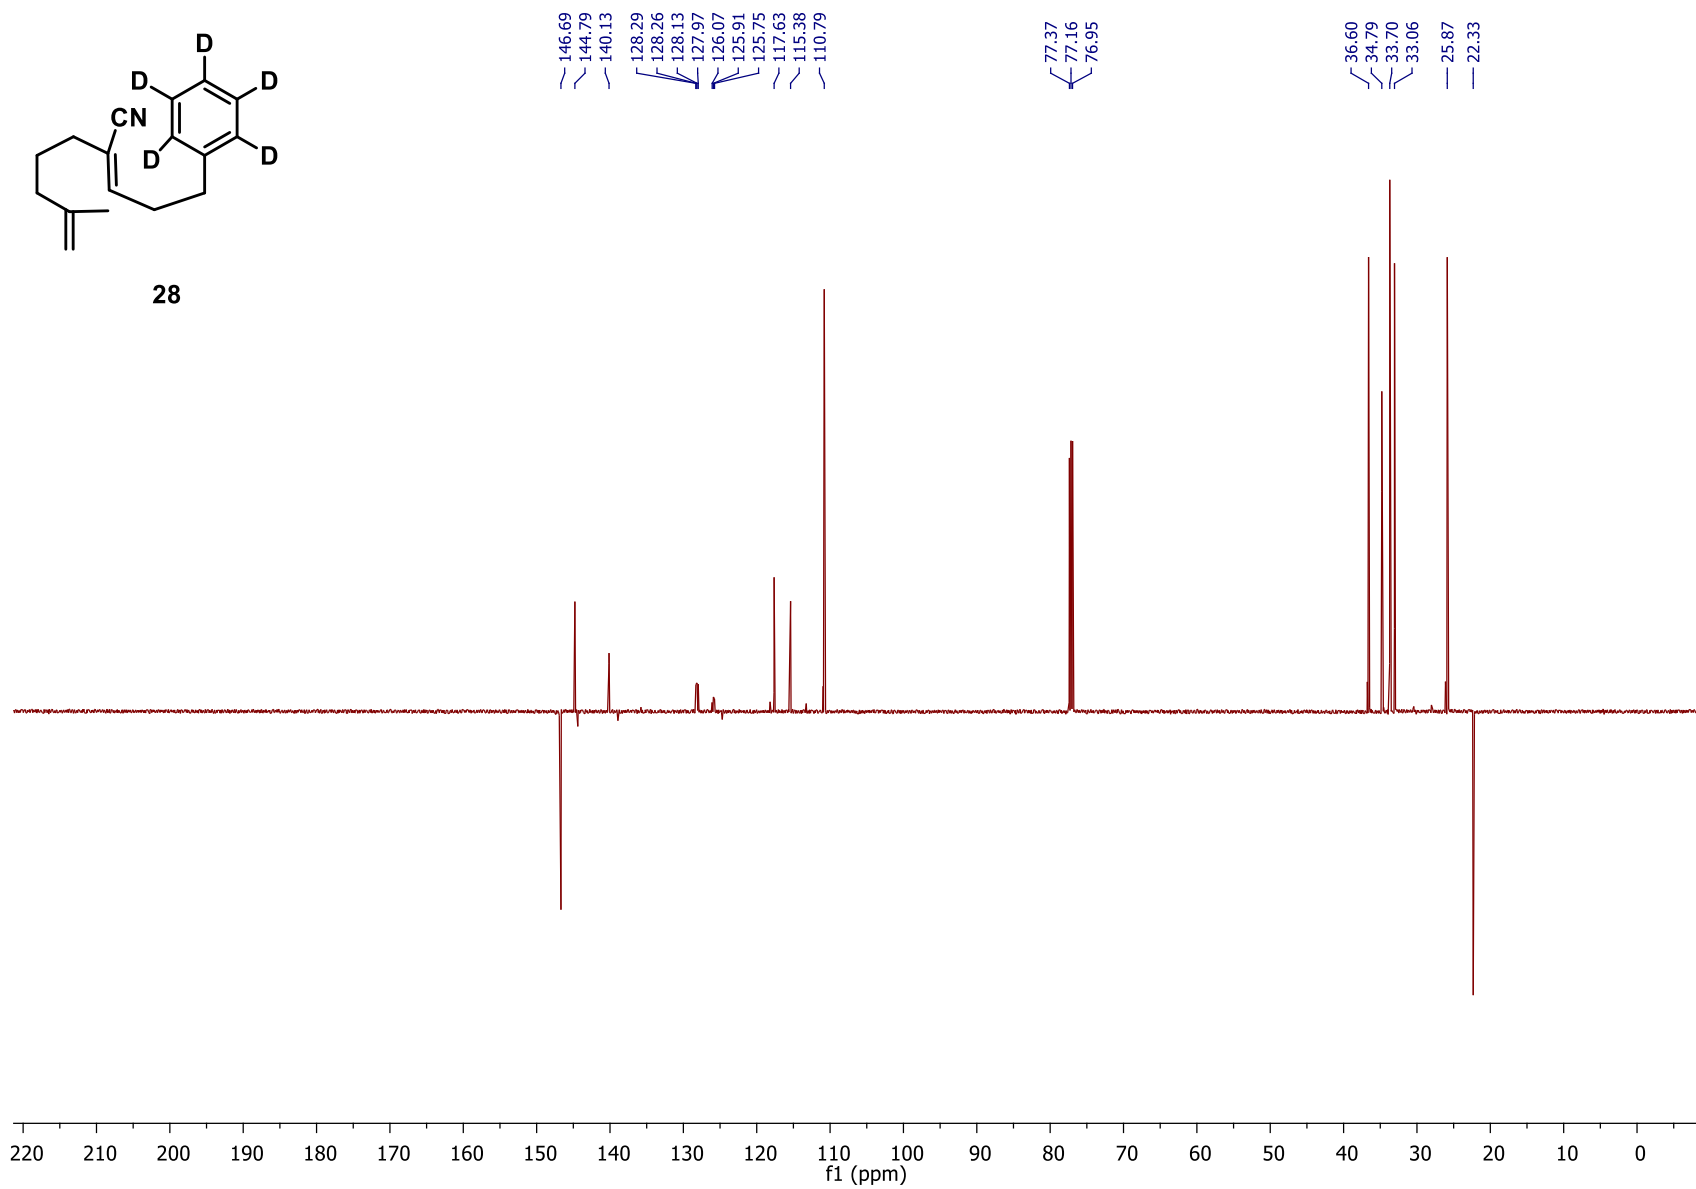

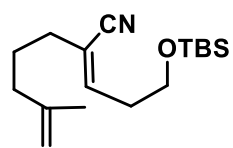

S53

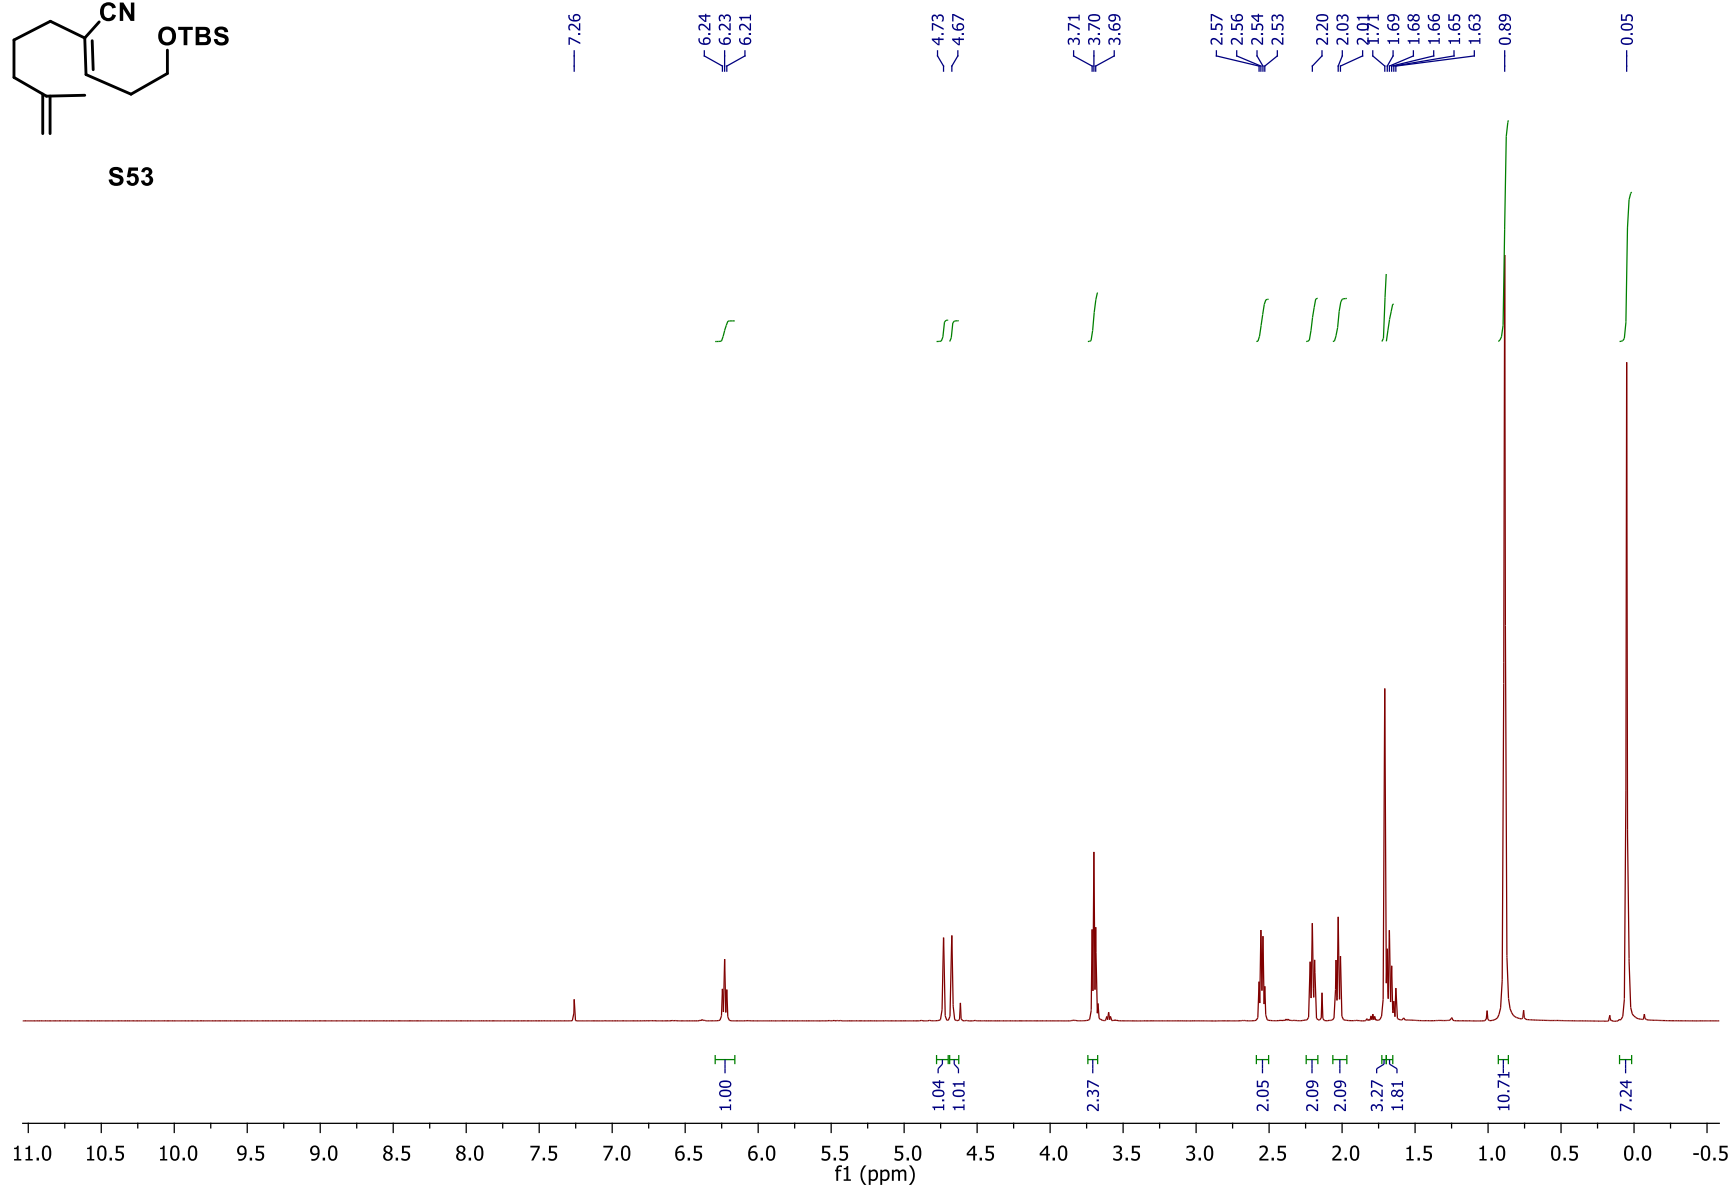

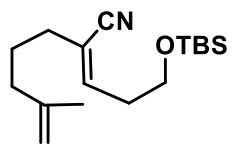

S53

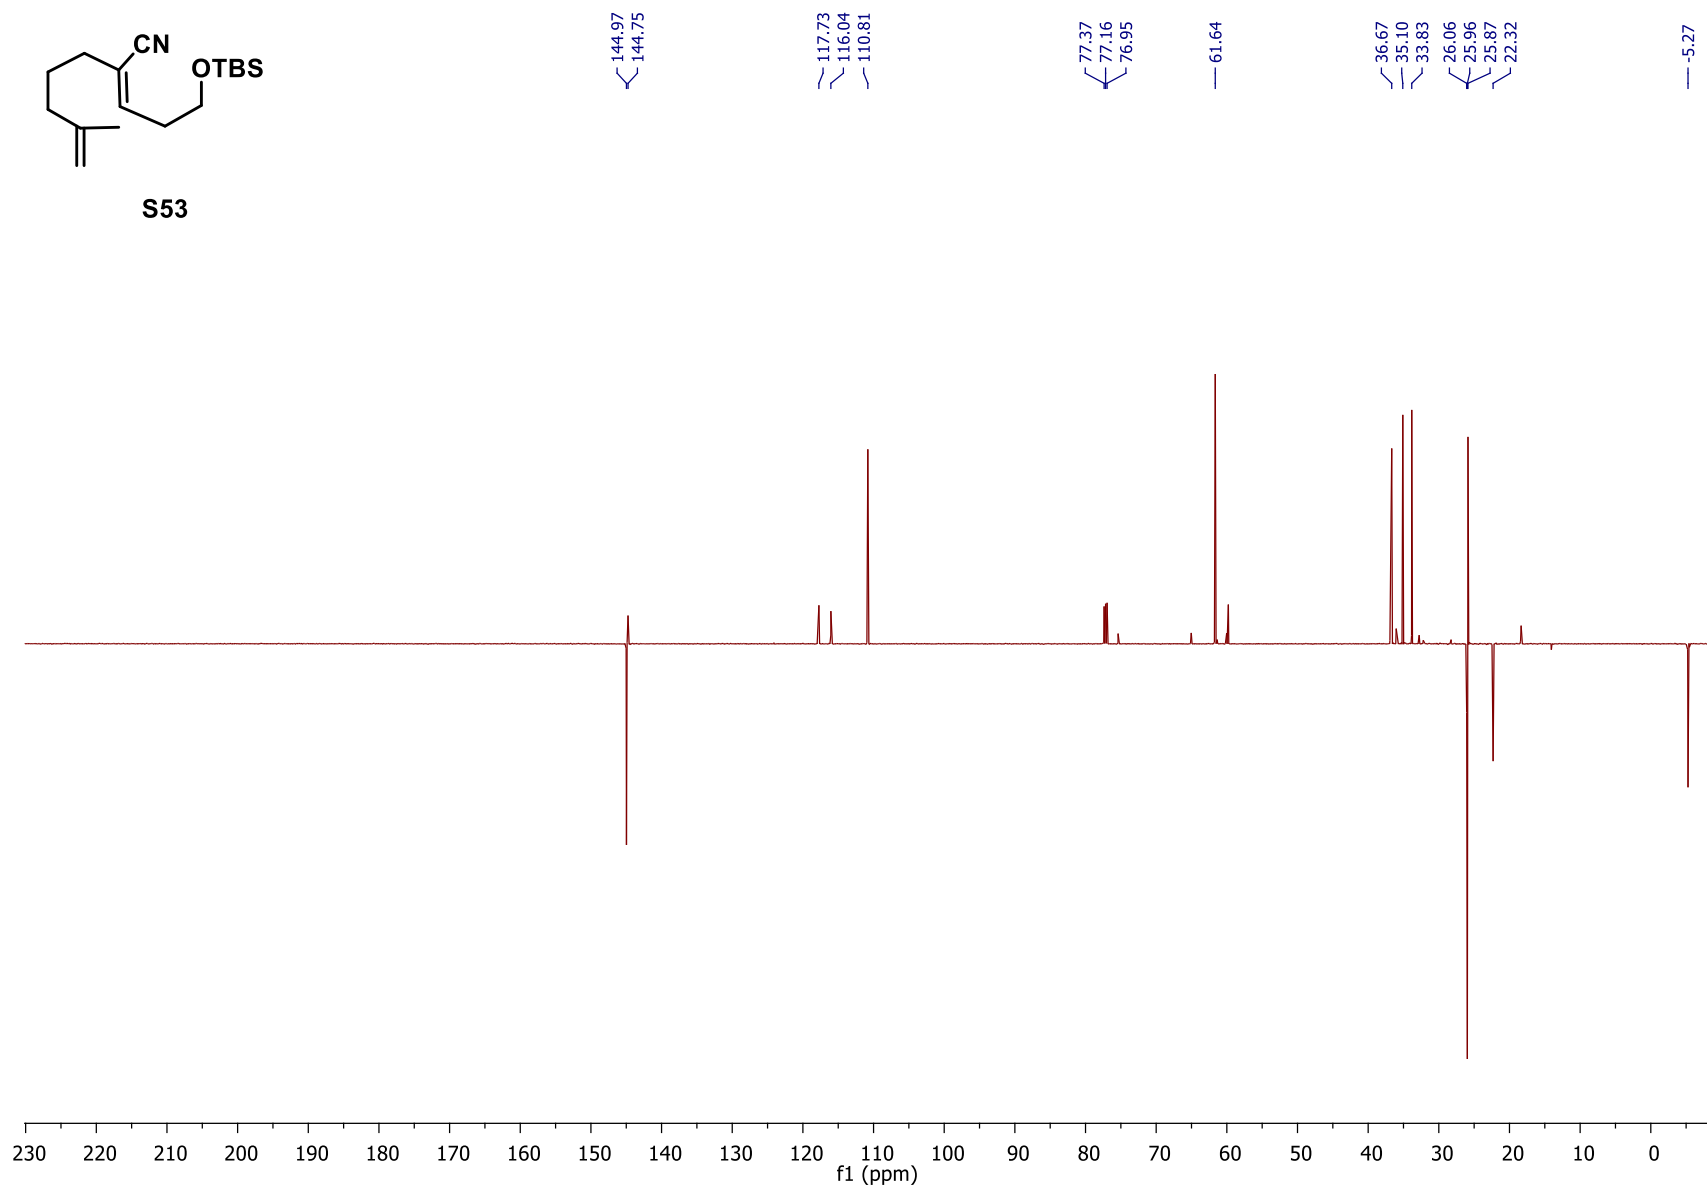

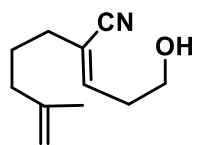

26

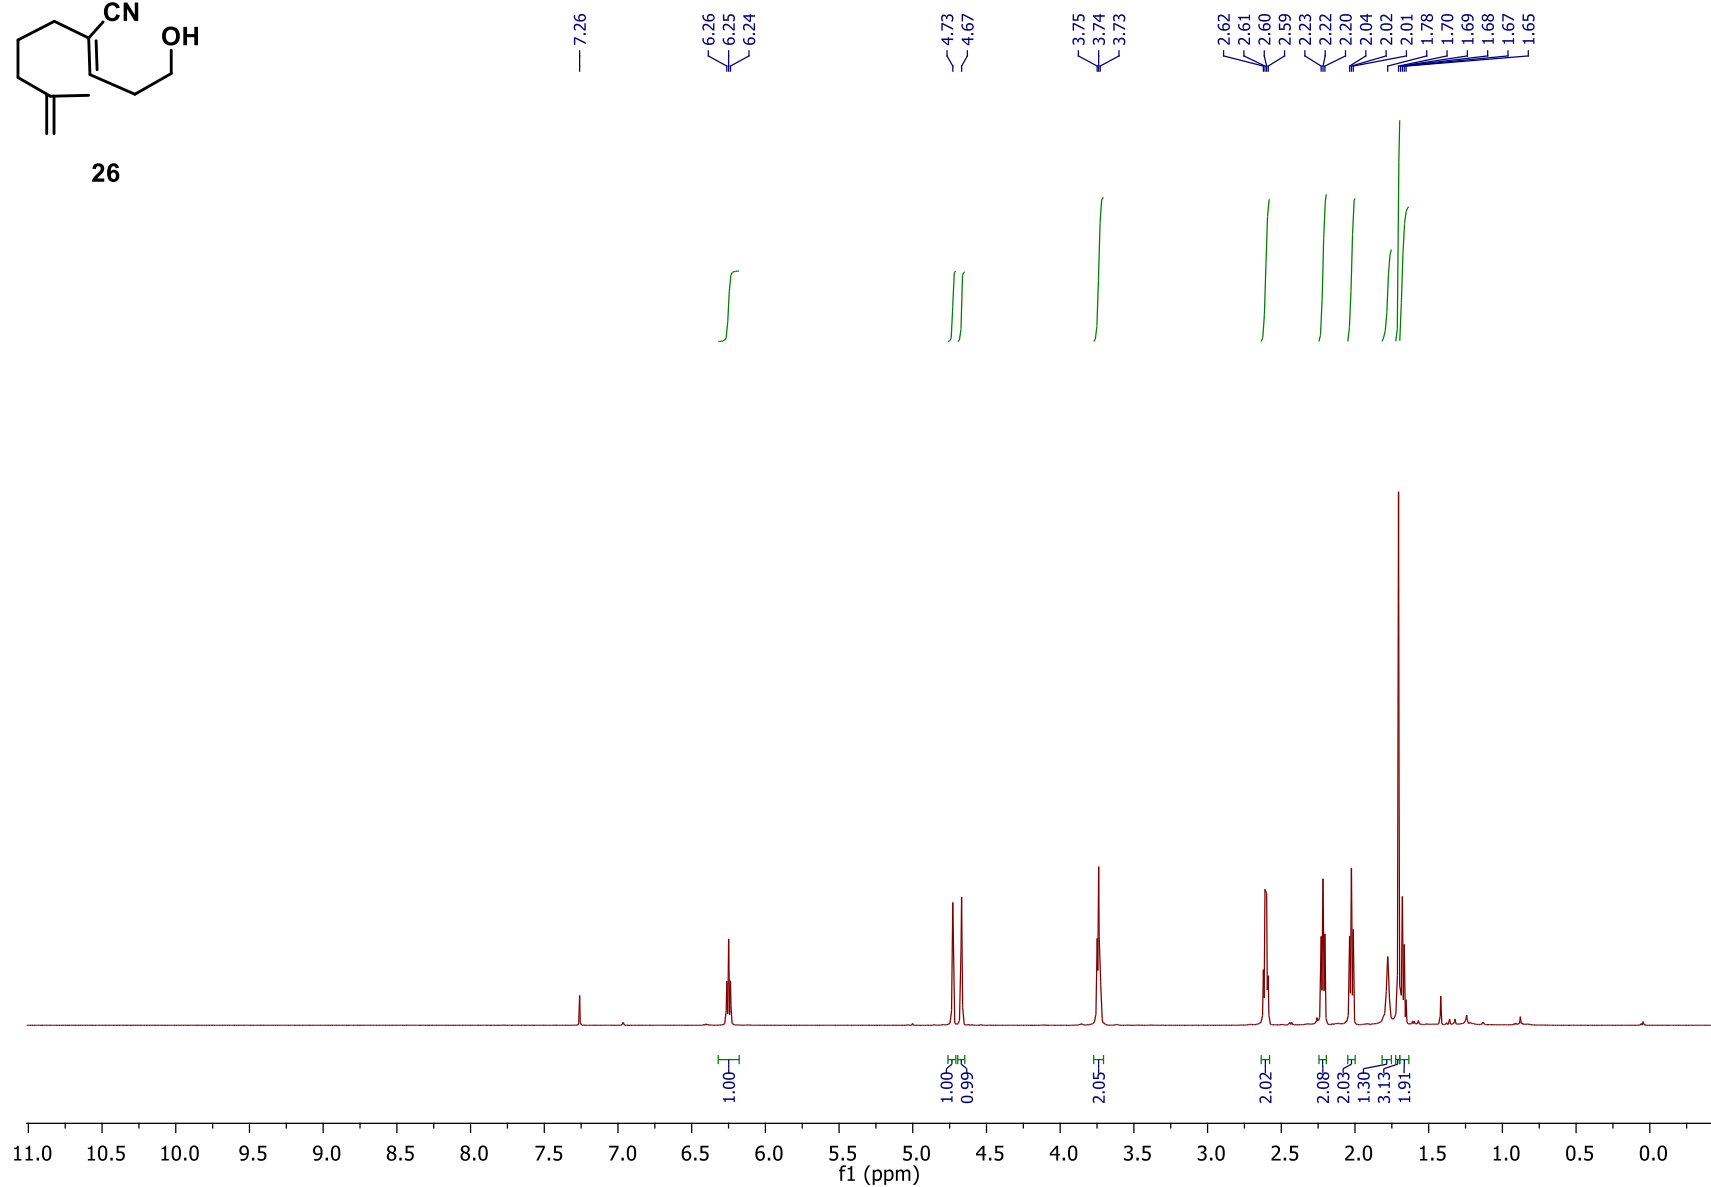

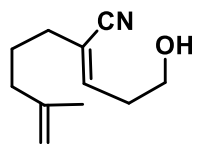

26

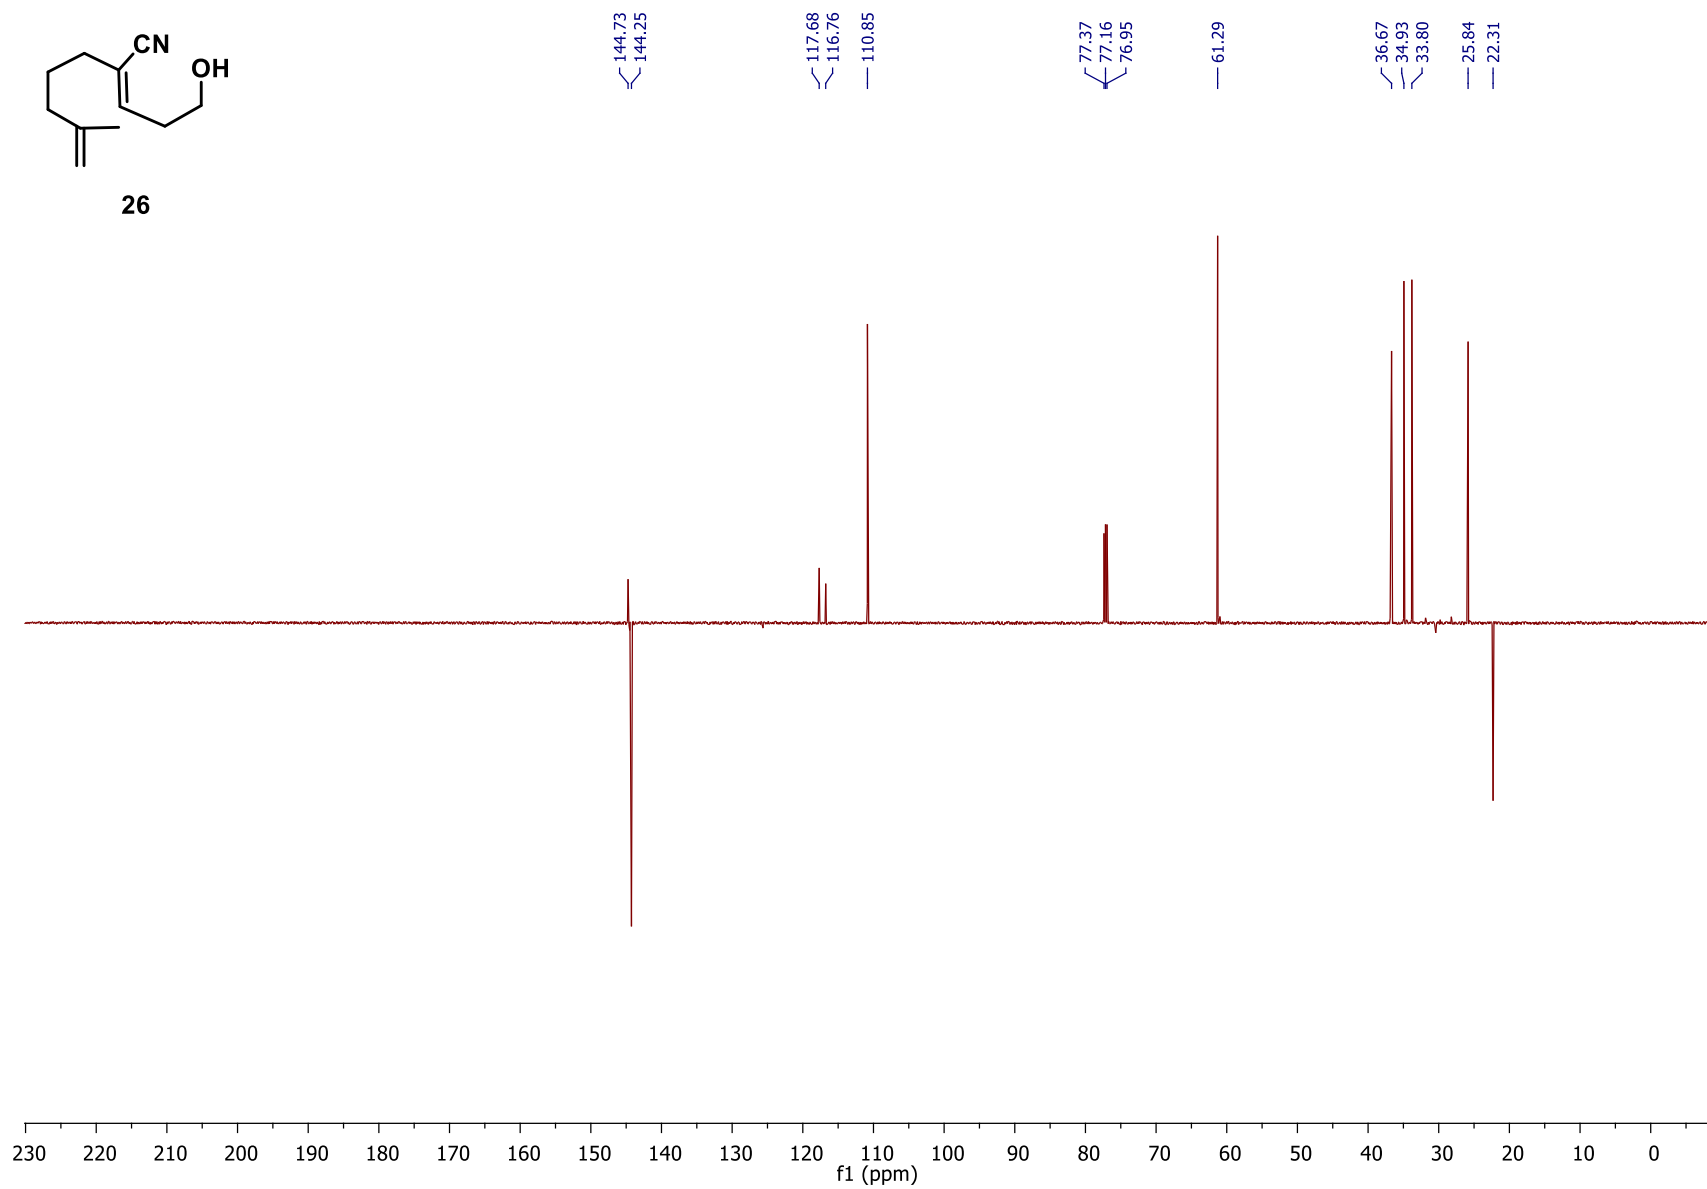

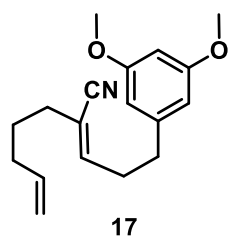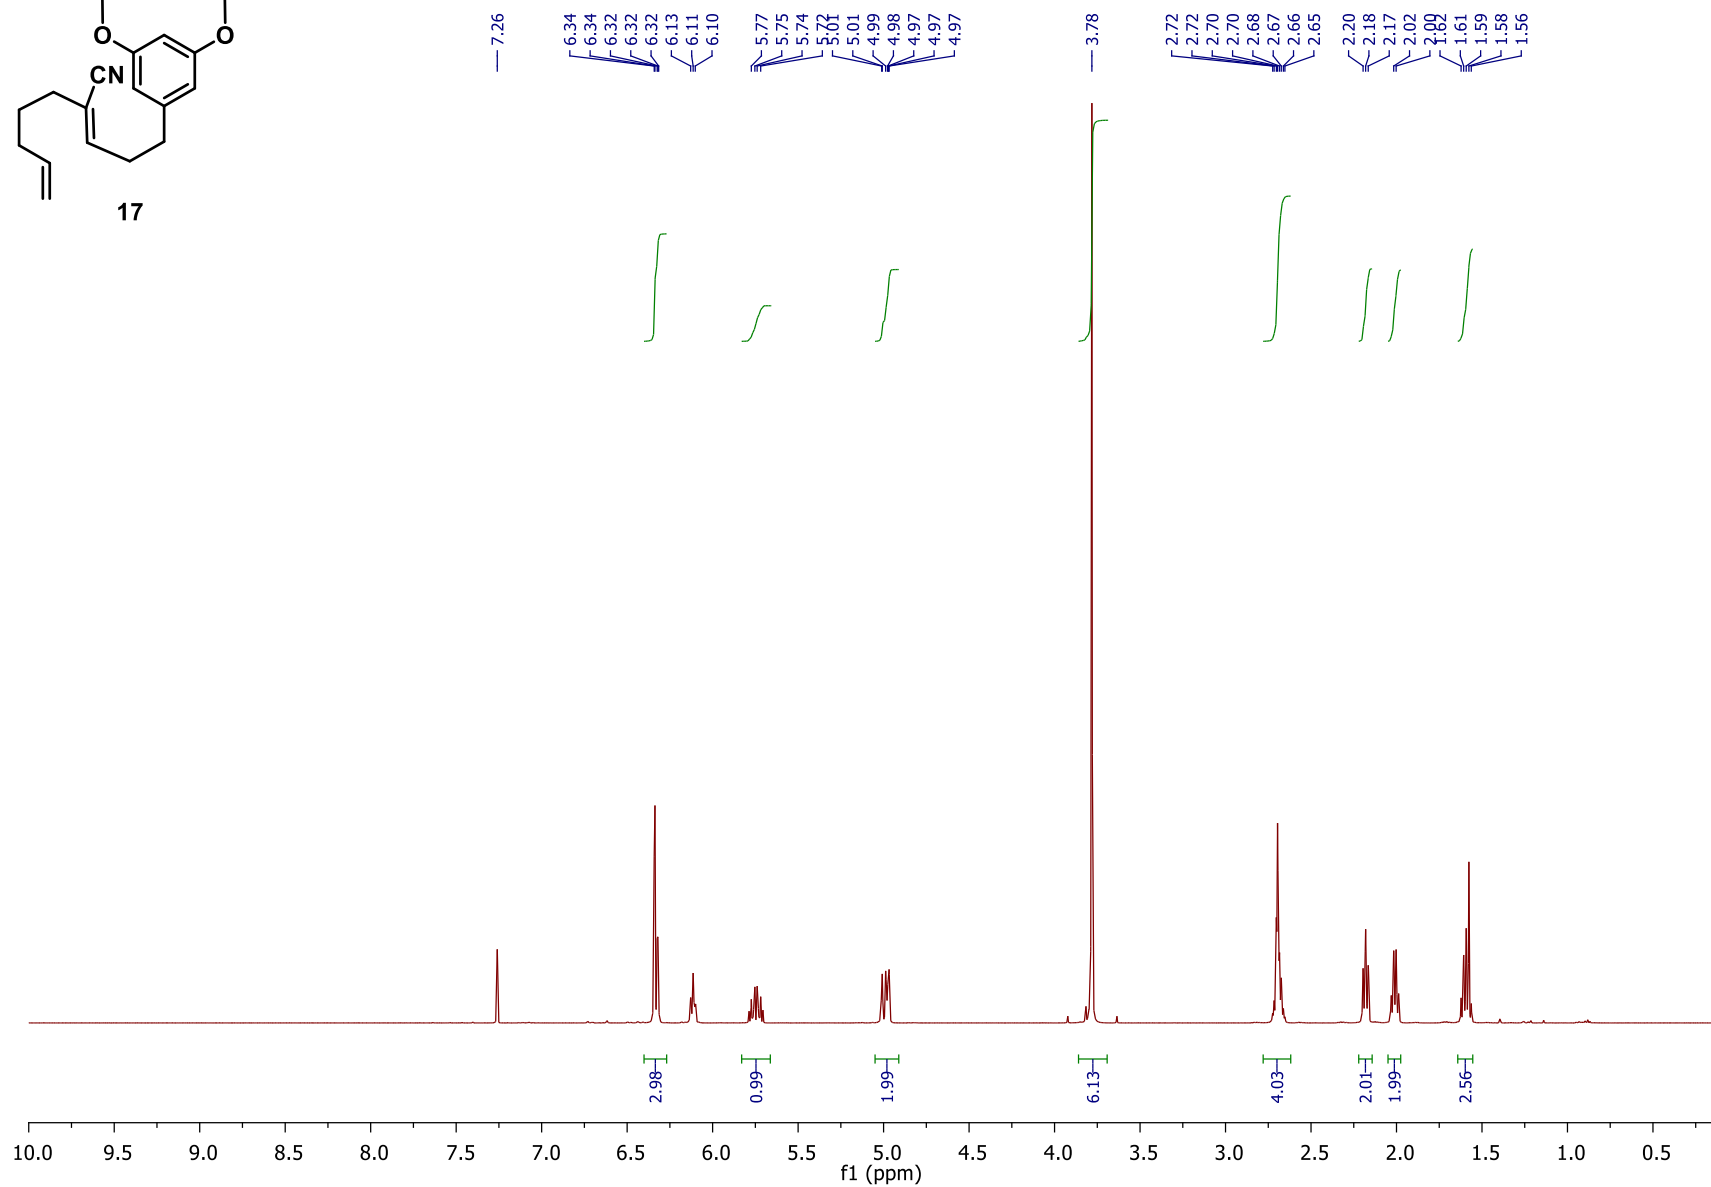

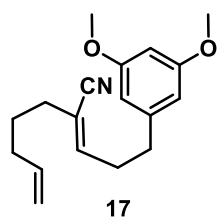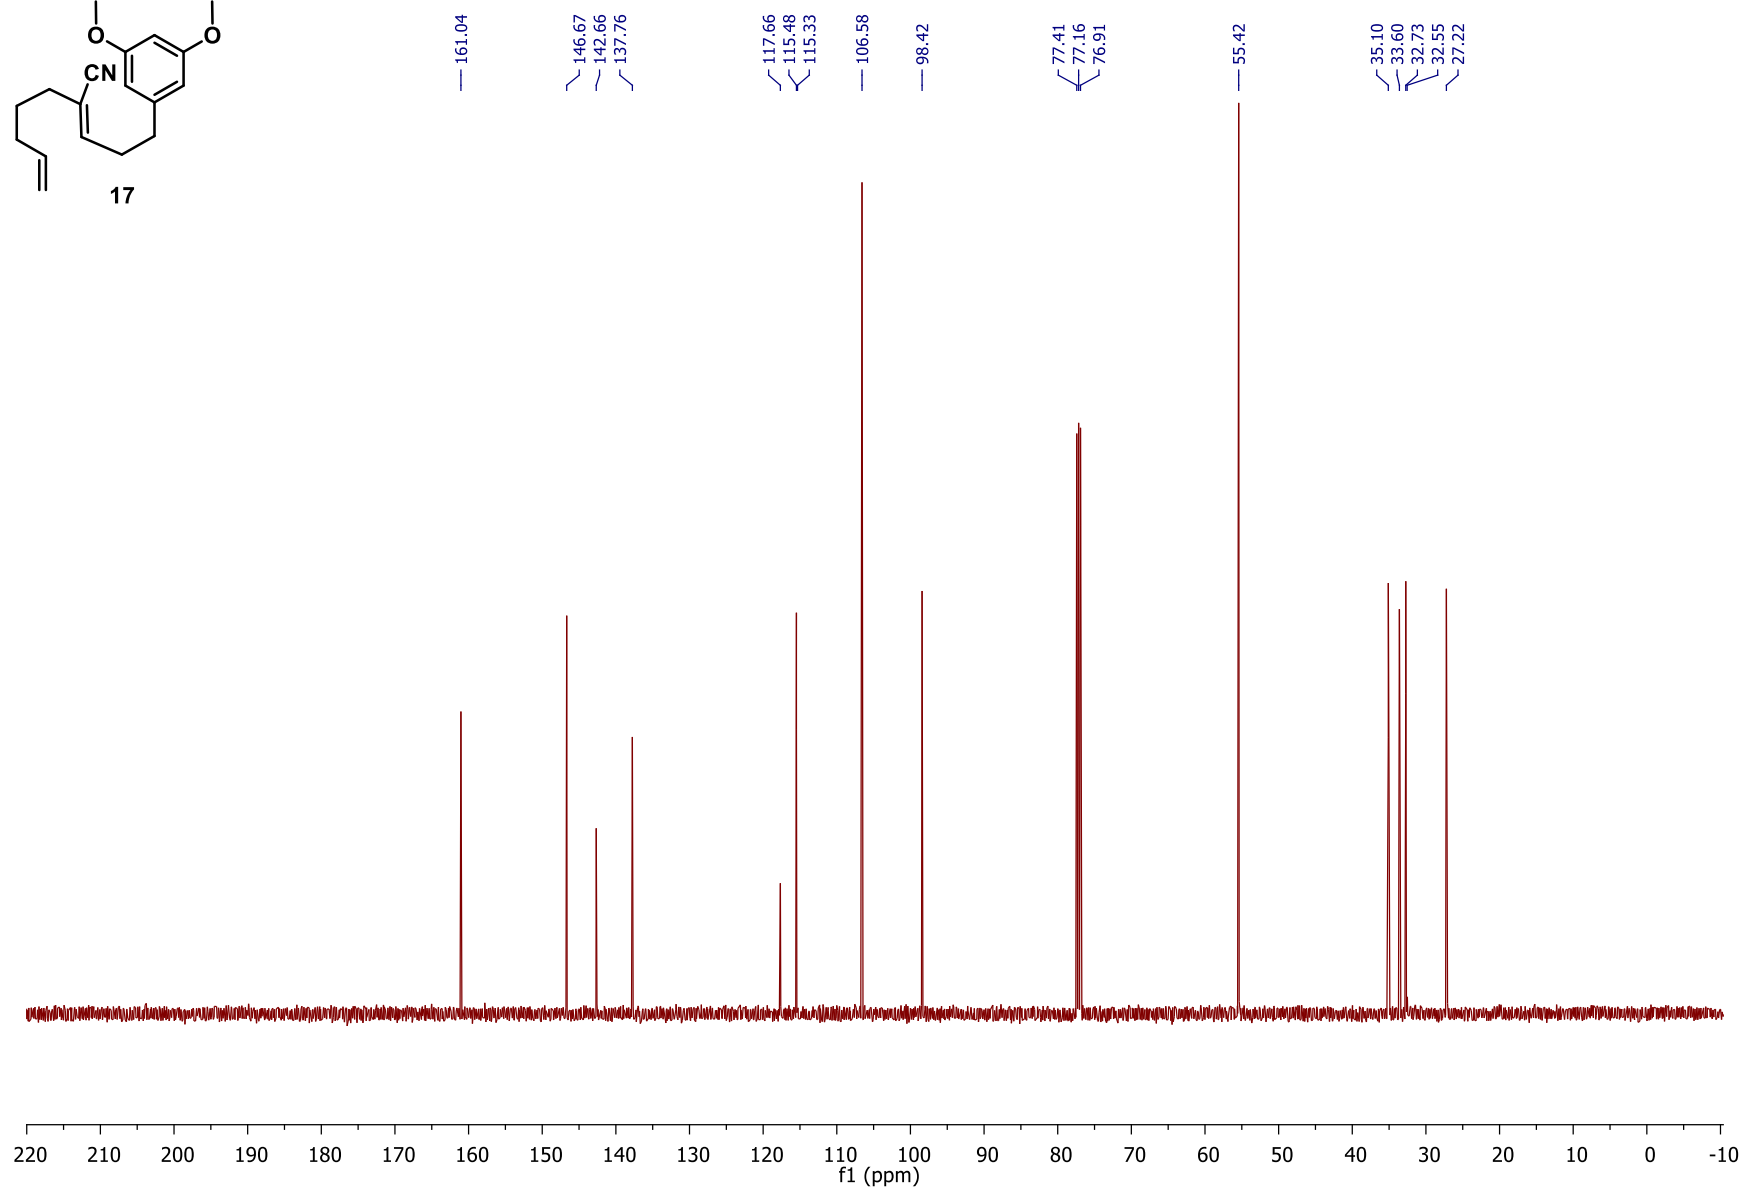

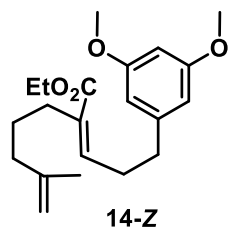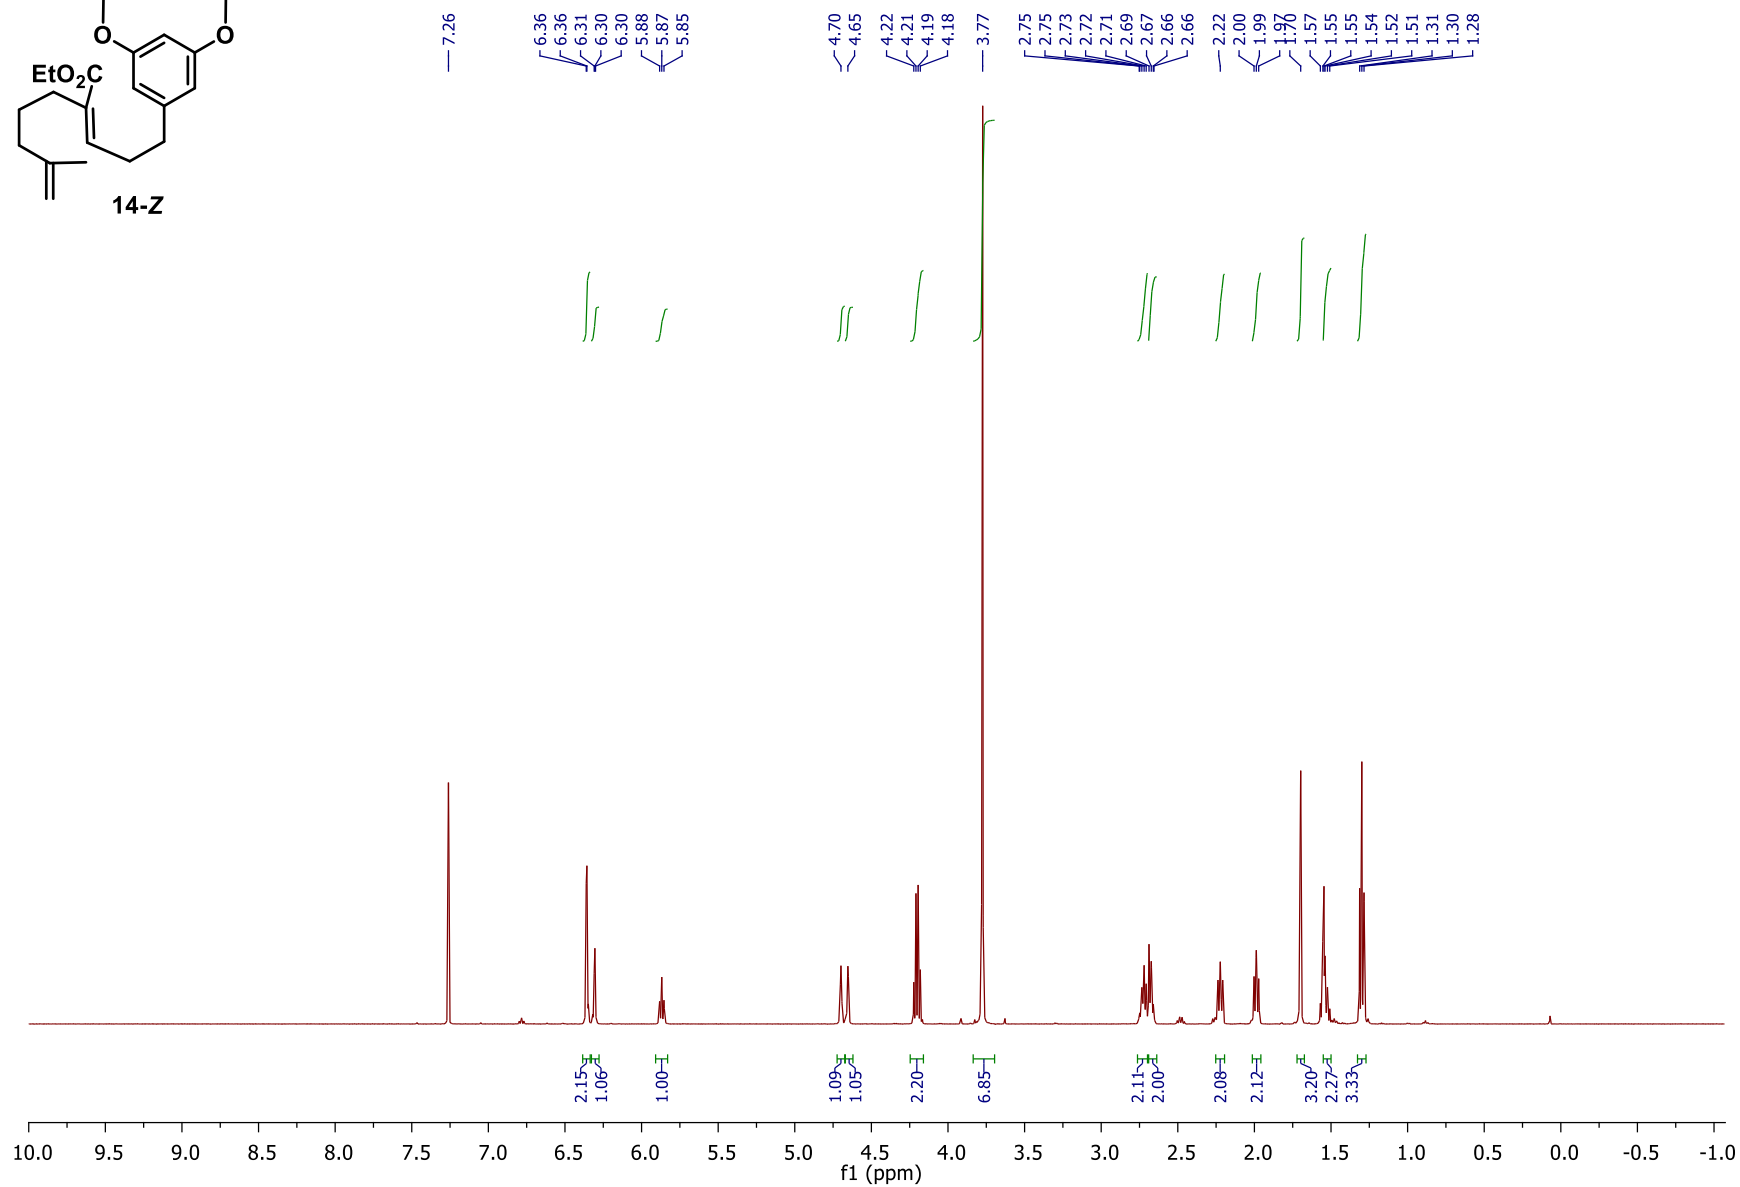



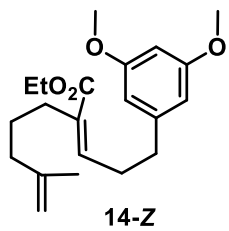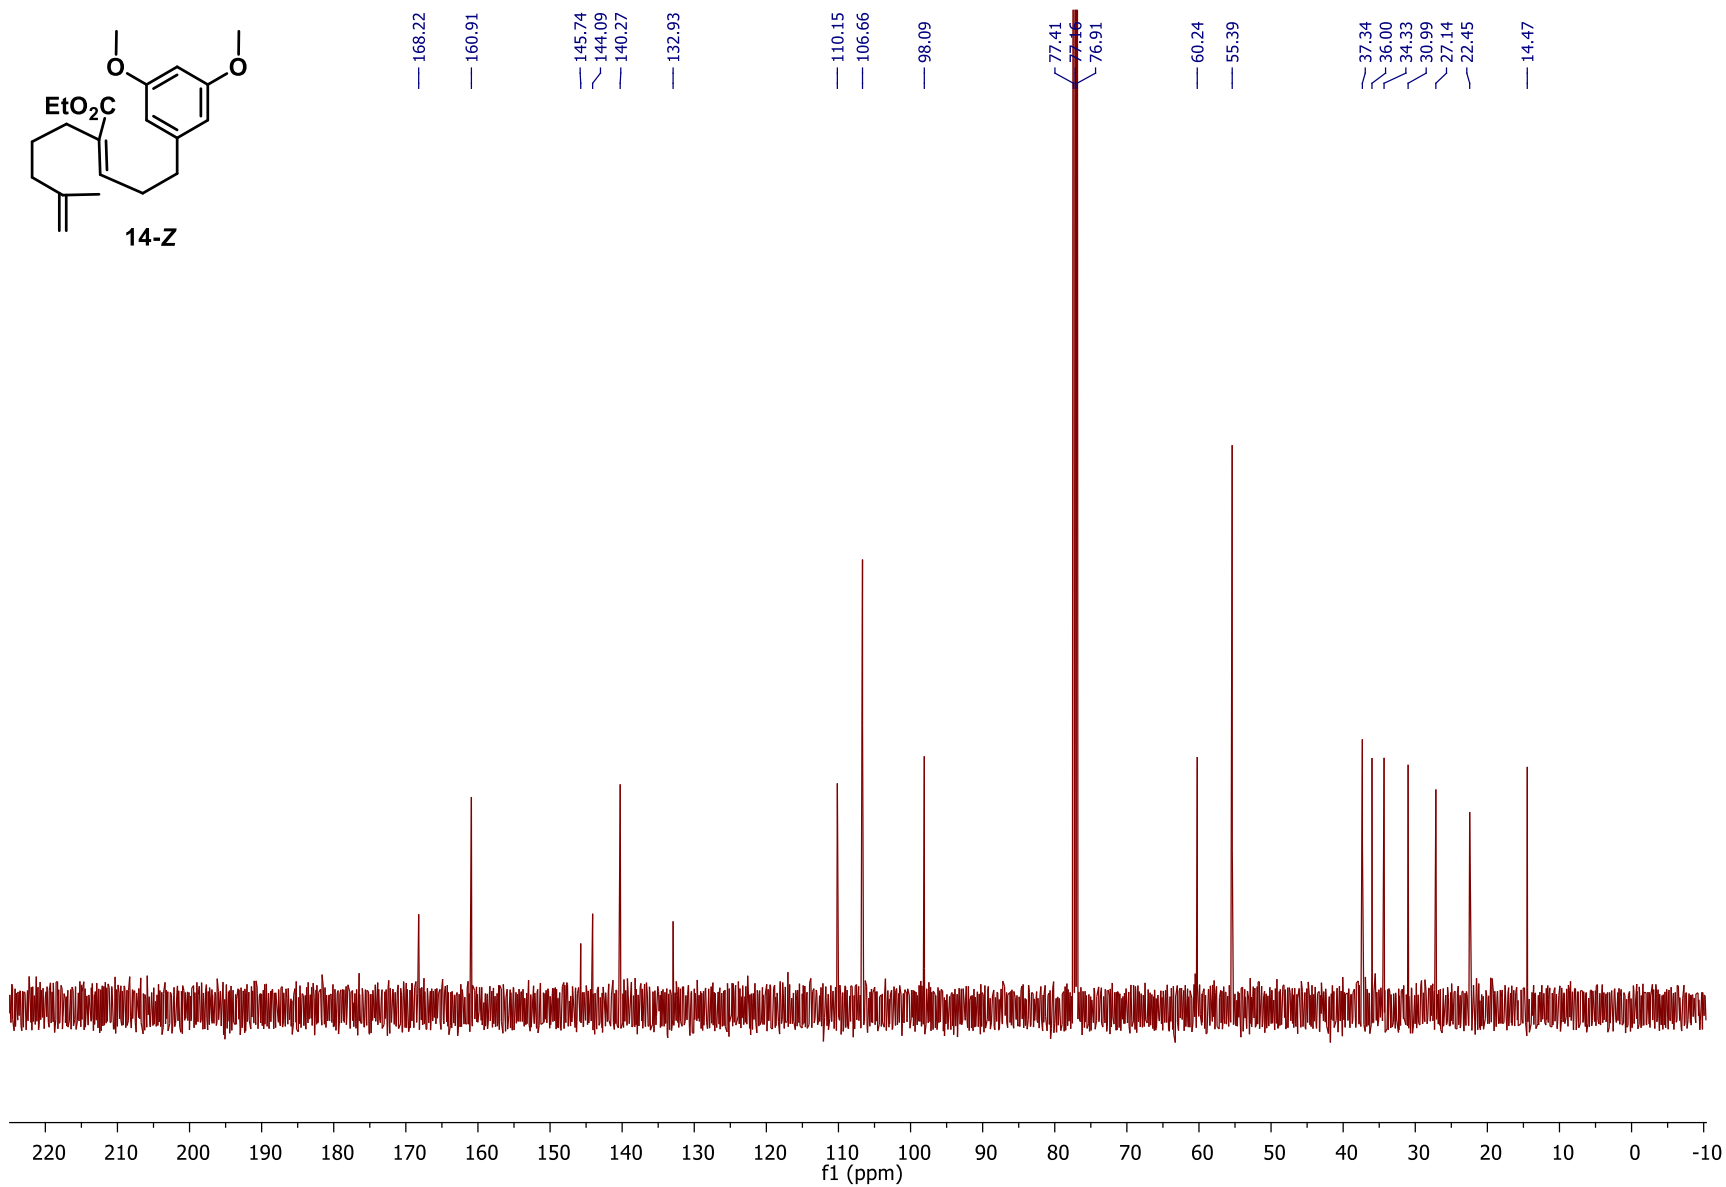

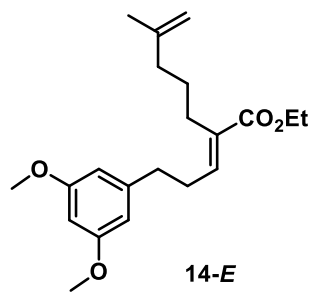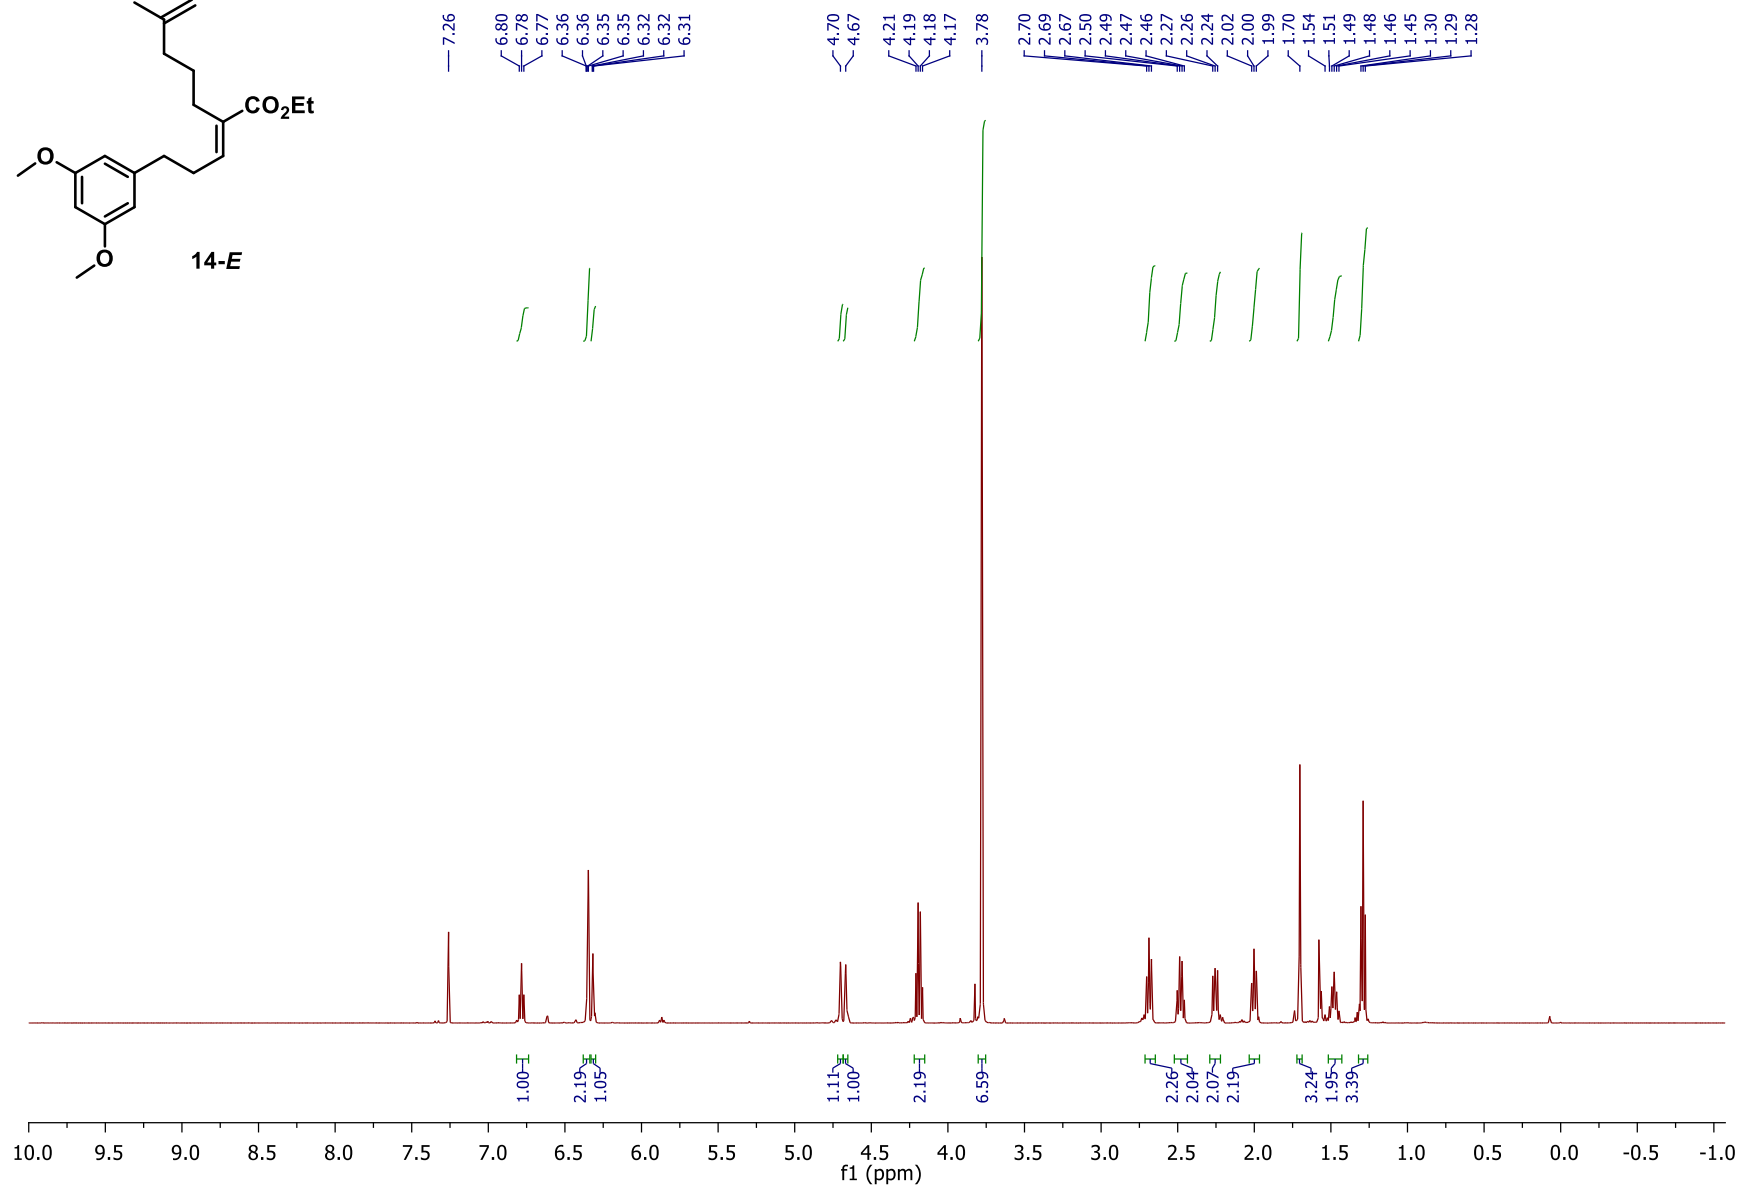

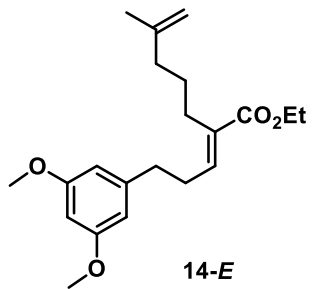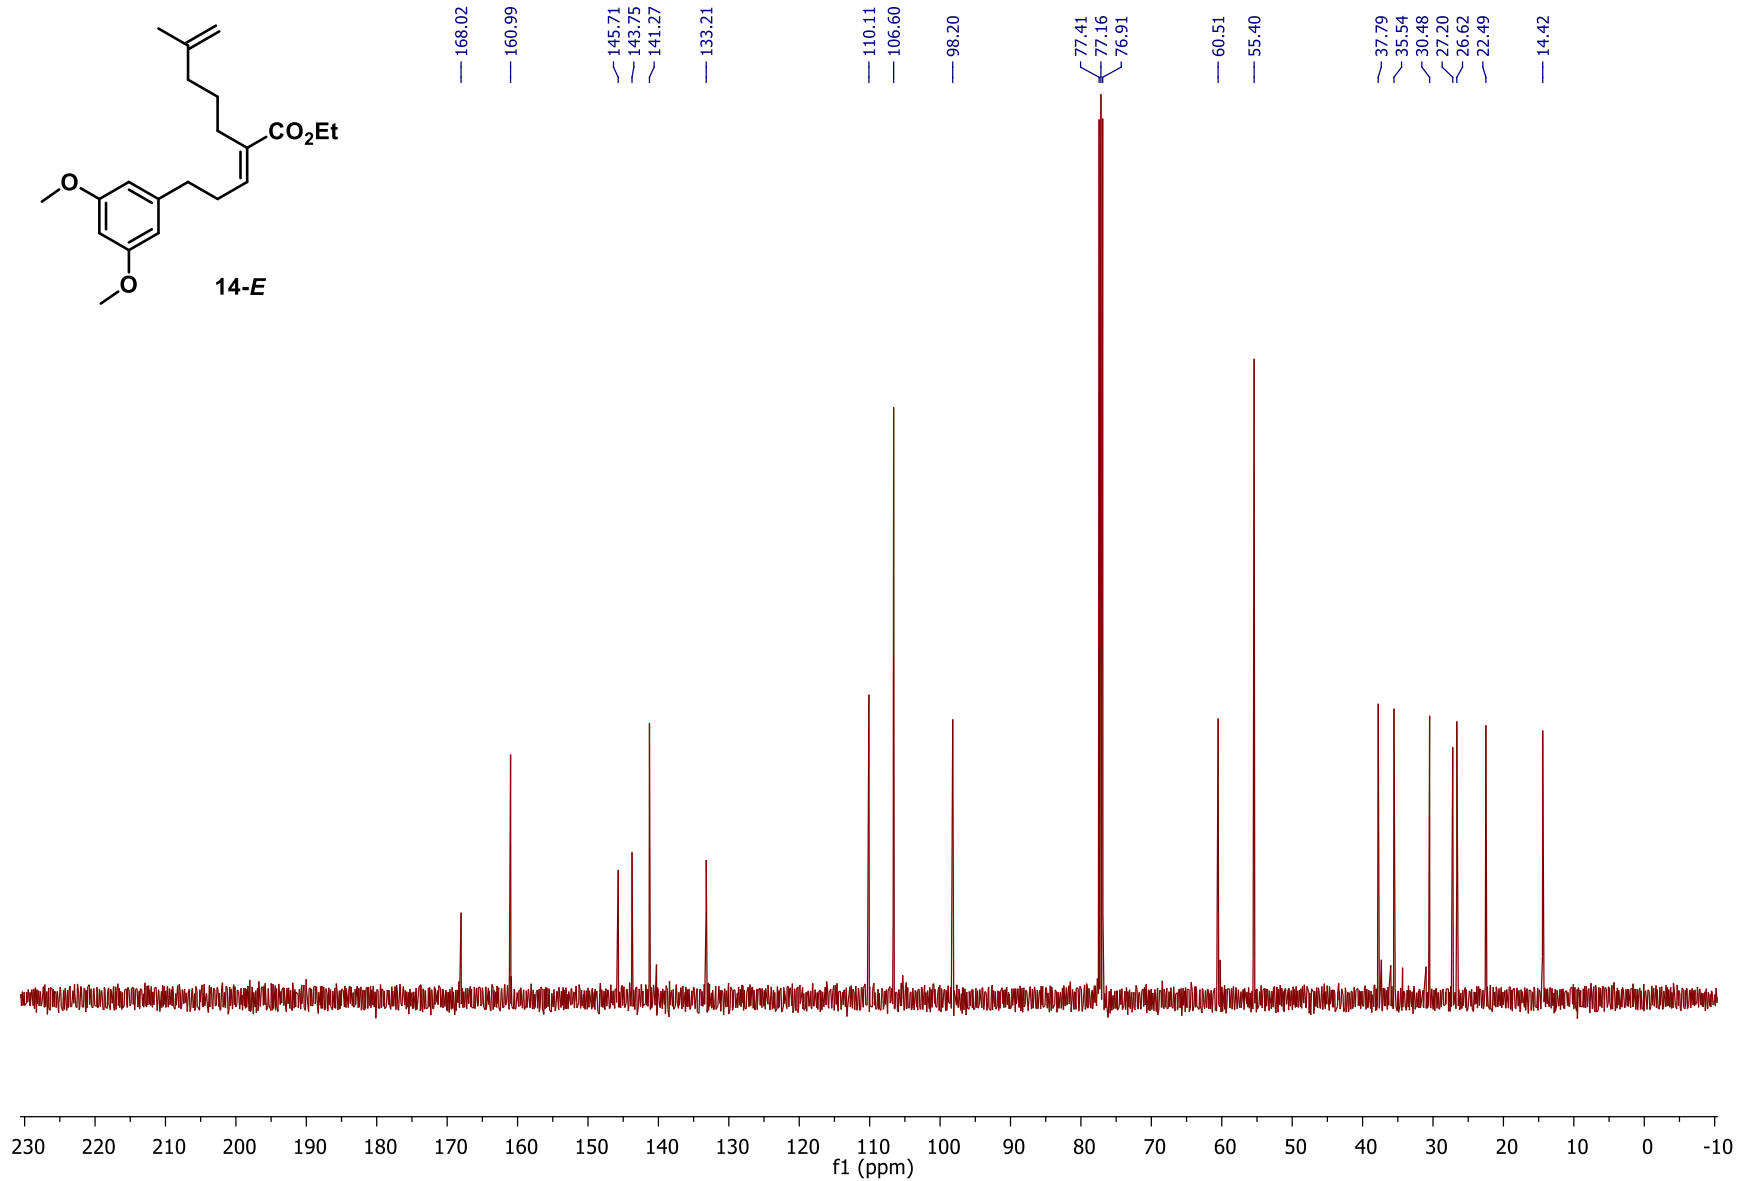

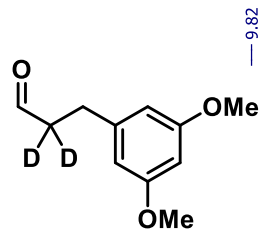

S9-d<sub>2</sub>

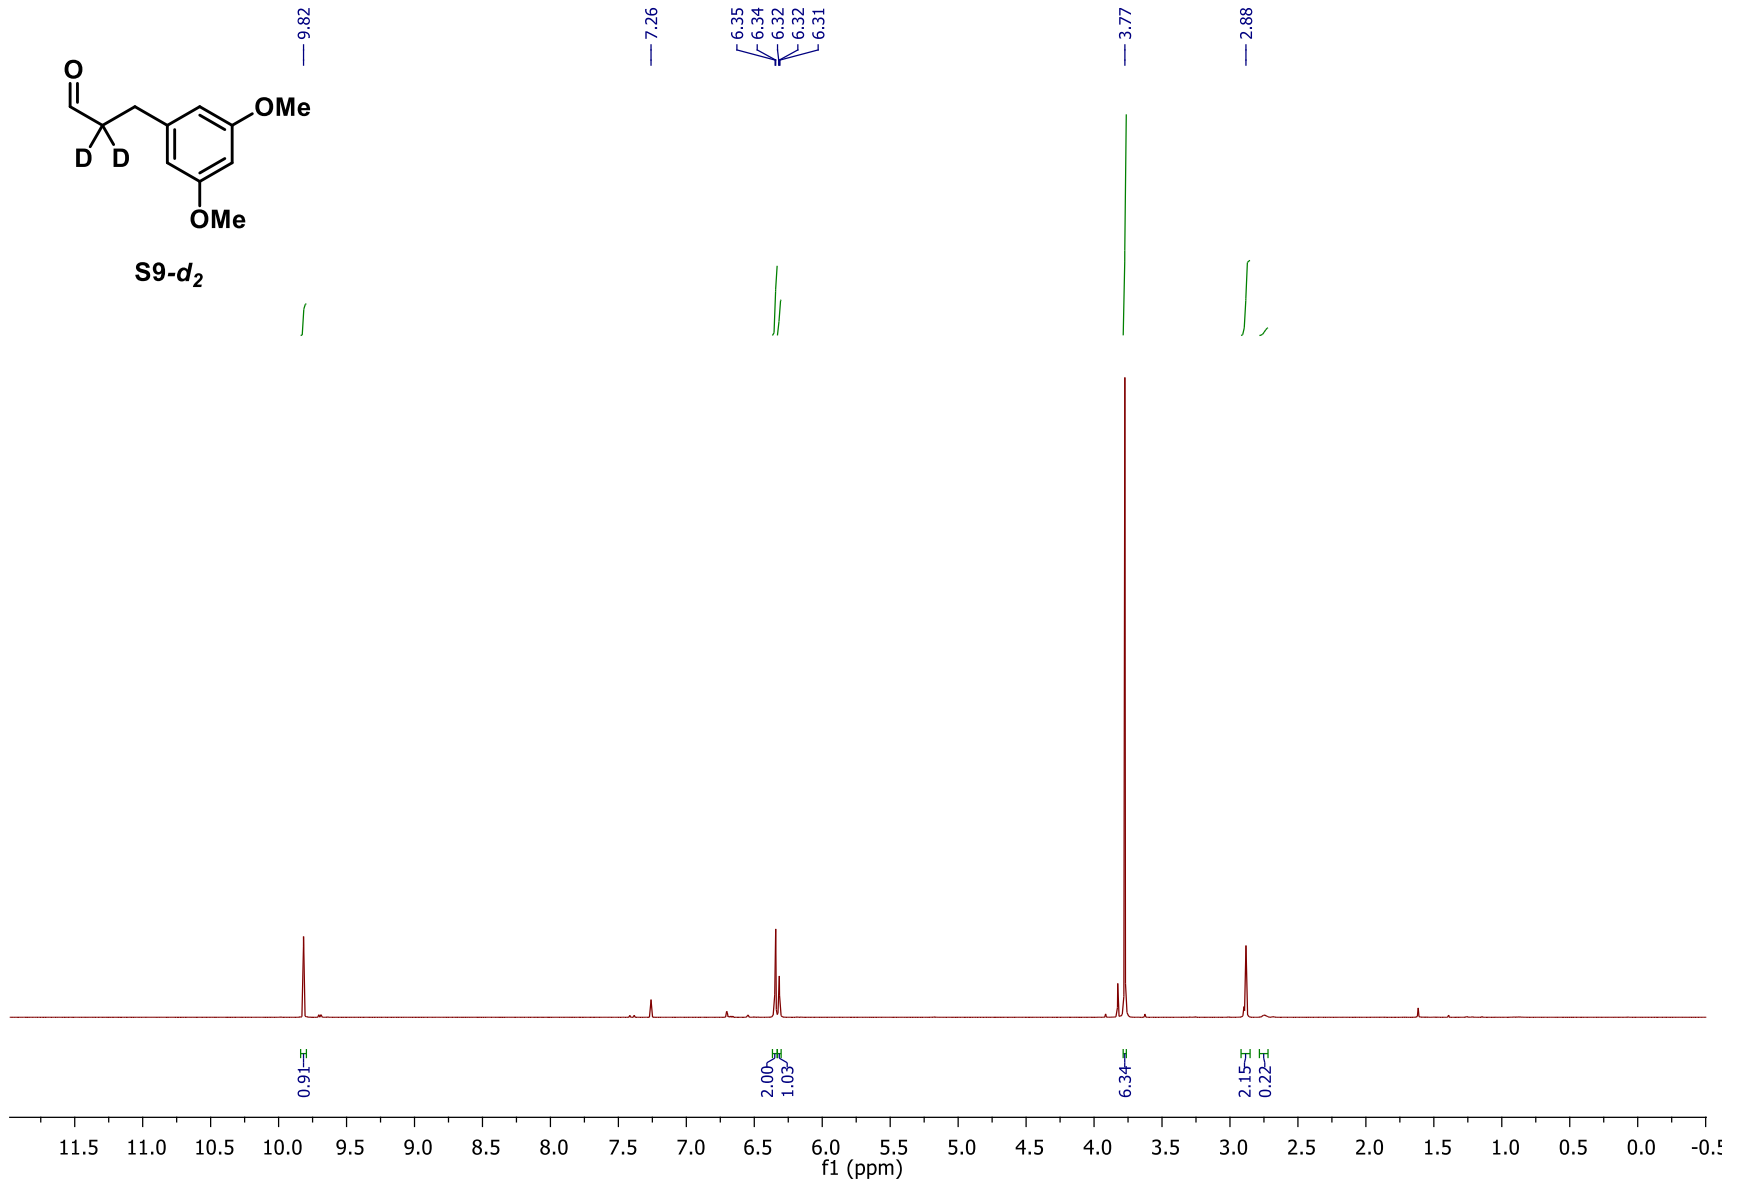

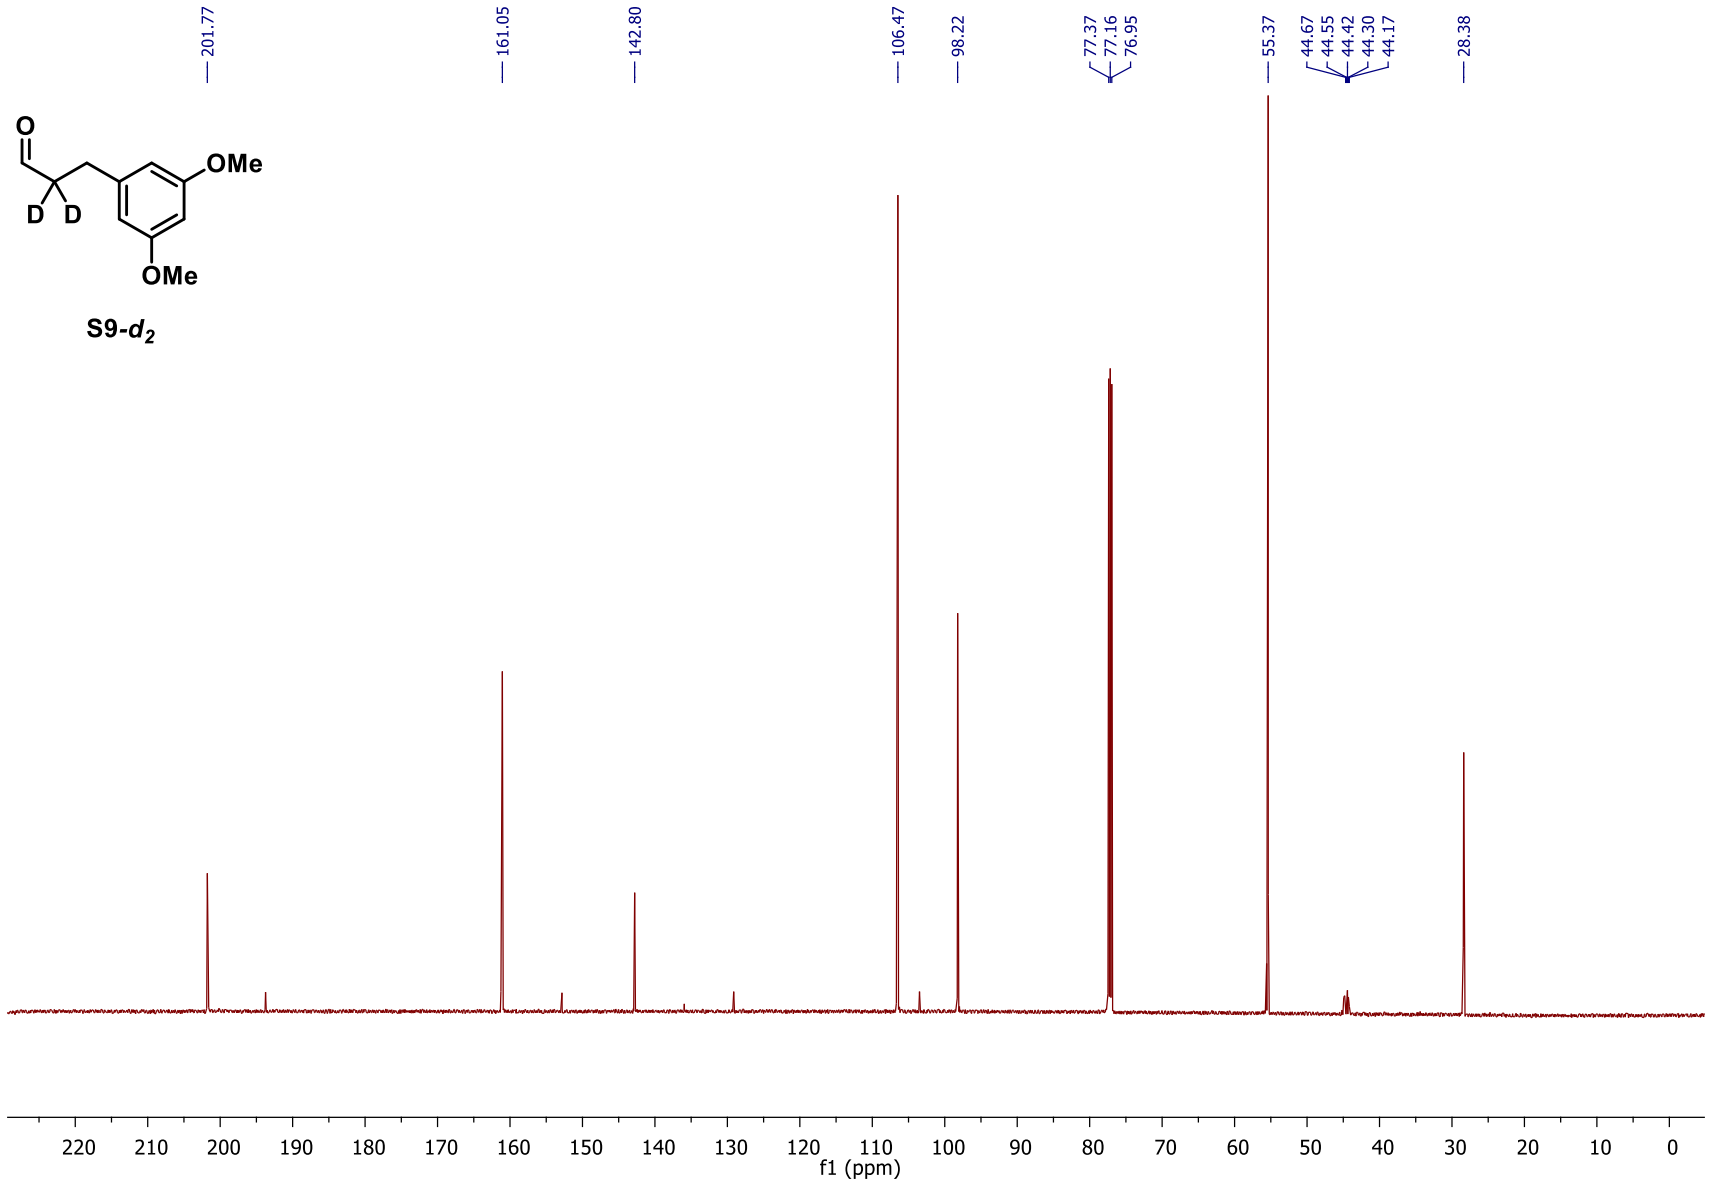

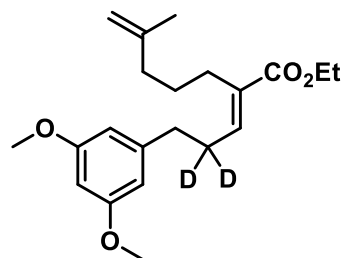

14-E-d<sub>2</sub> (~90% d<sub>2</sub>)

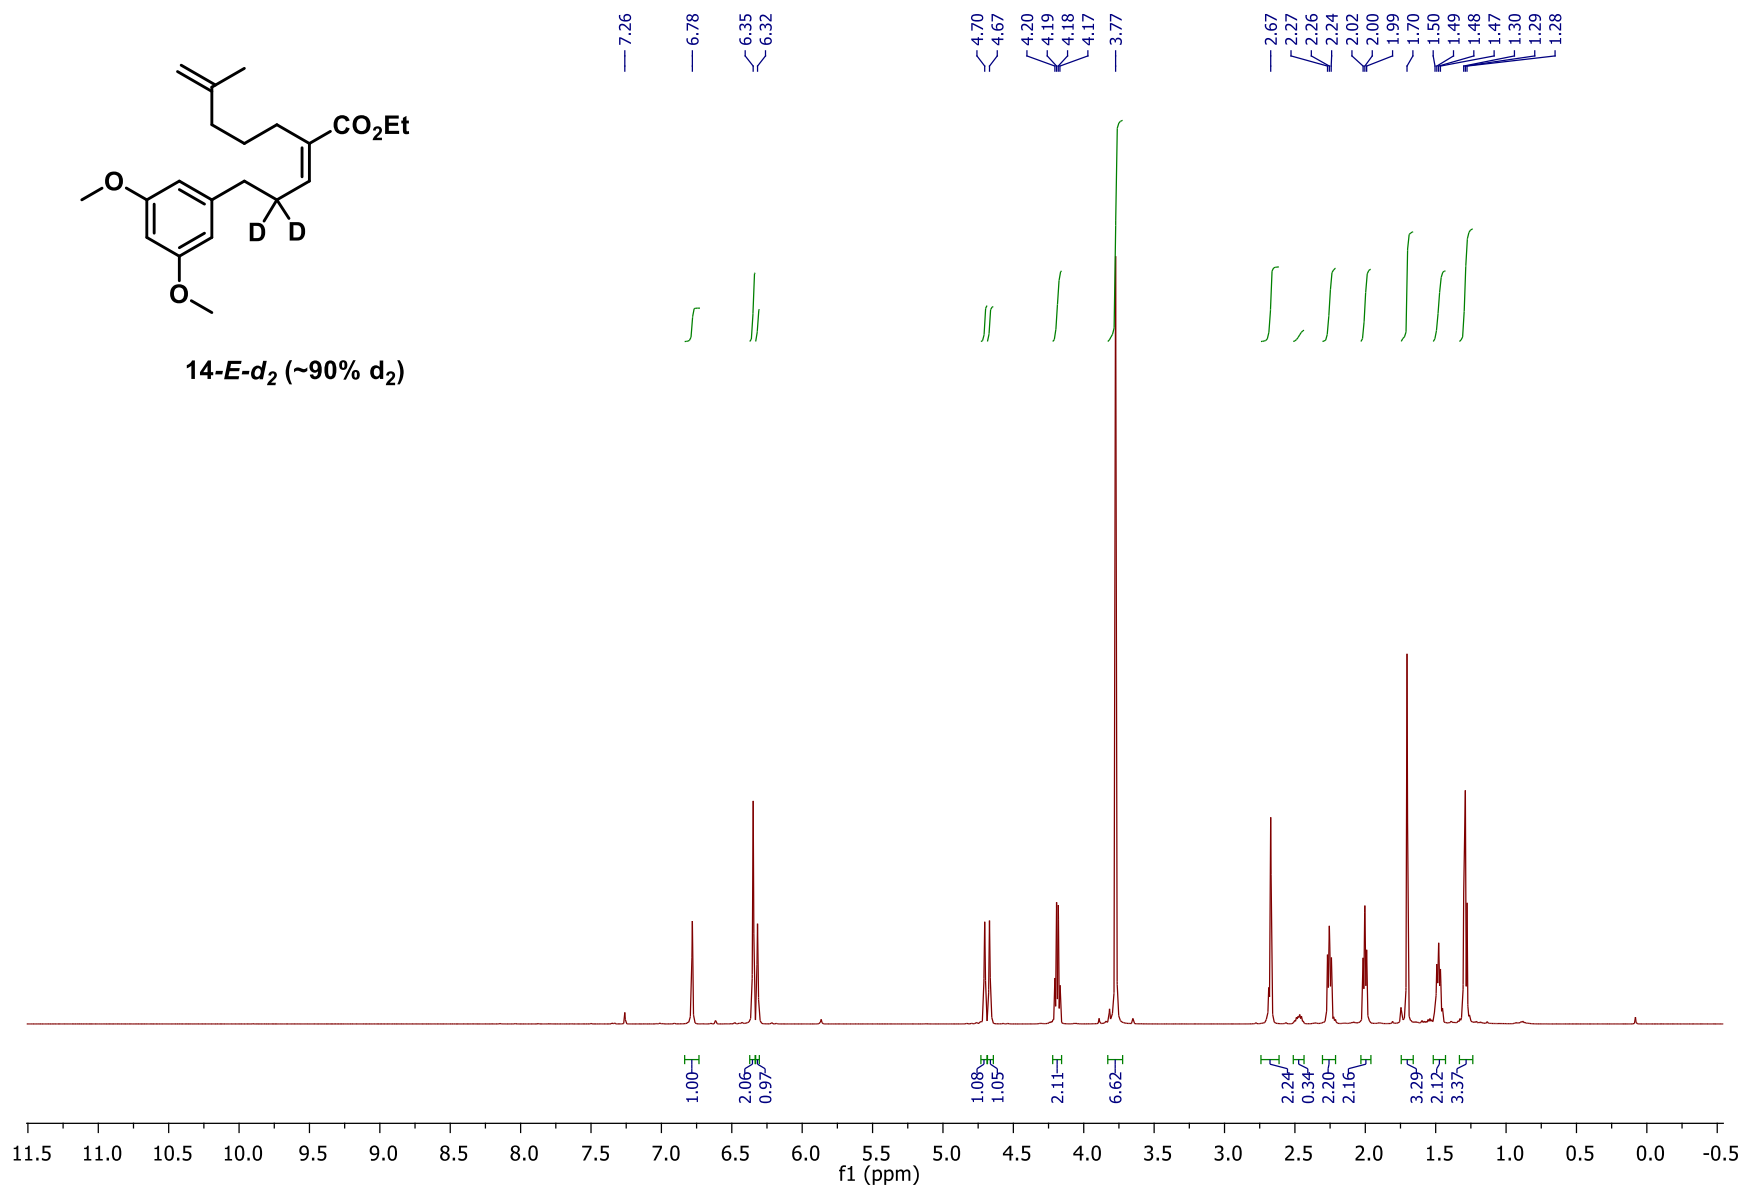

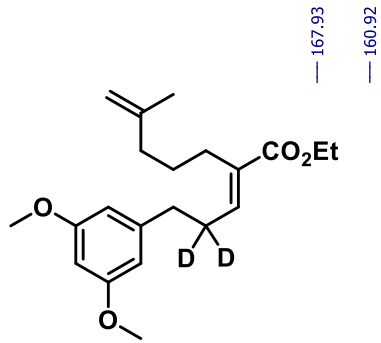

14-E-d<sub>2</sub> (~90% d<sub>2</sub>)

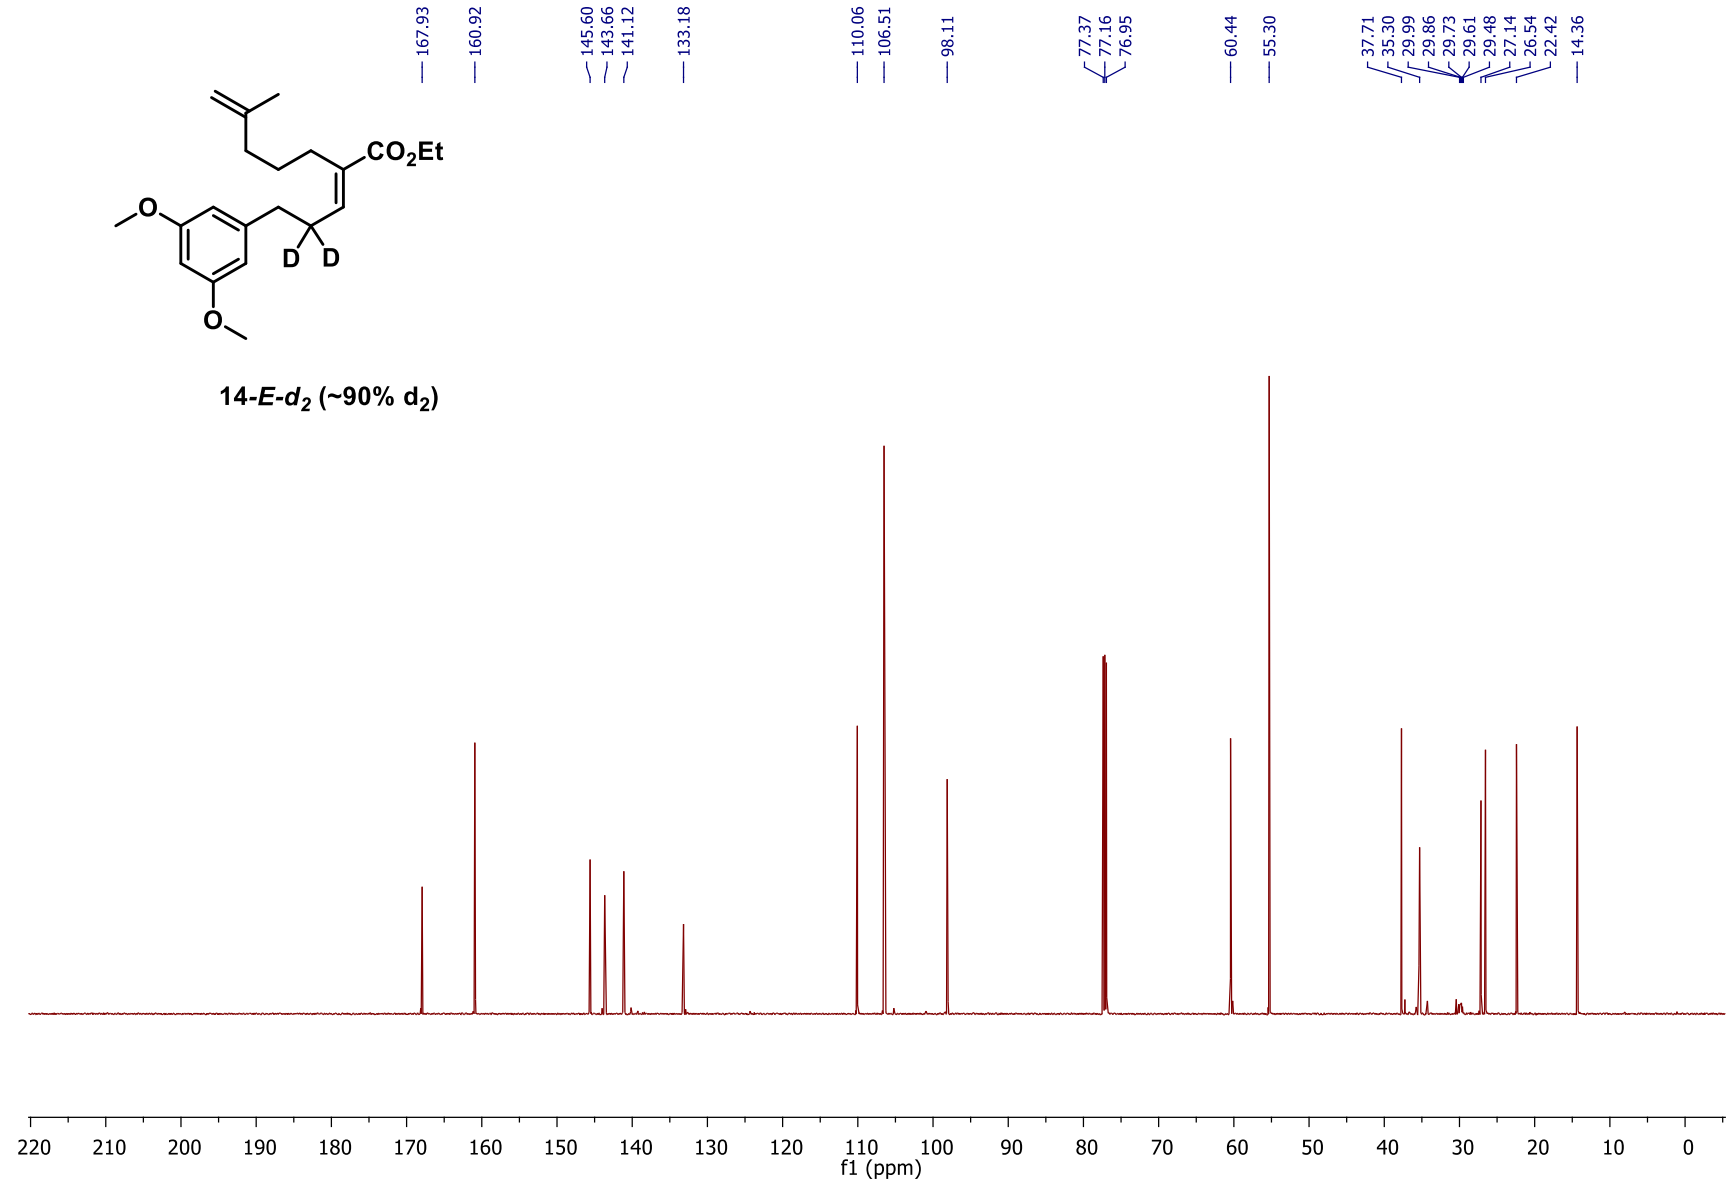

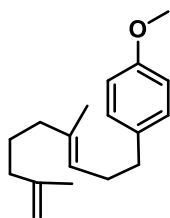

S29

(contains ~11% of trisubstituted alkene isomer)

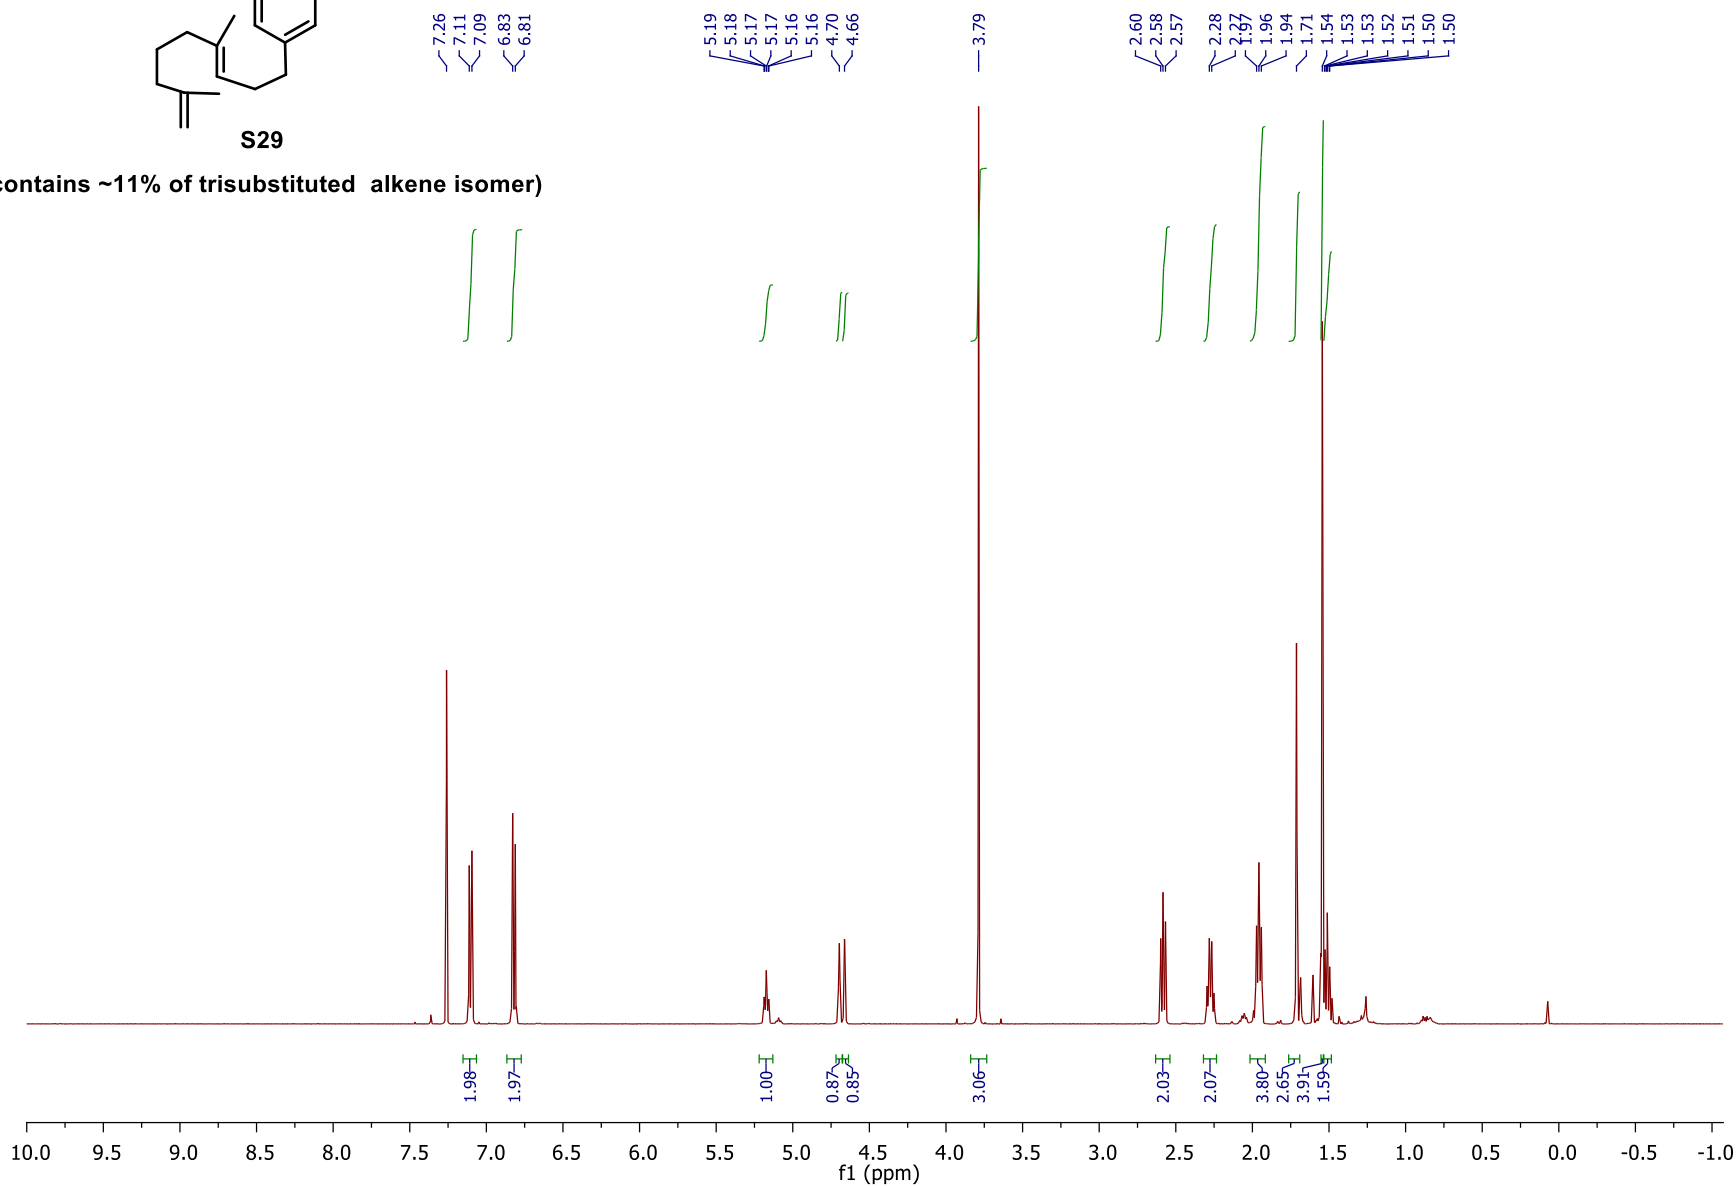



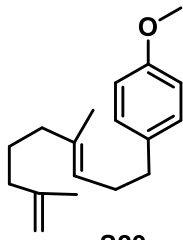

**S29**

(contains ~11% of trisubstituted alkene isomer)

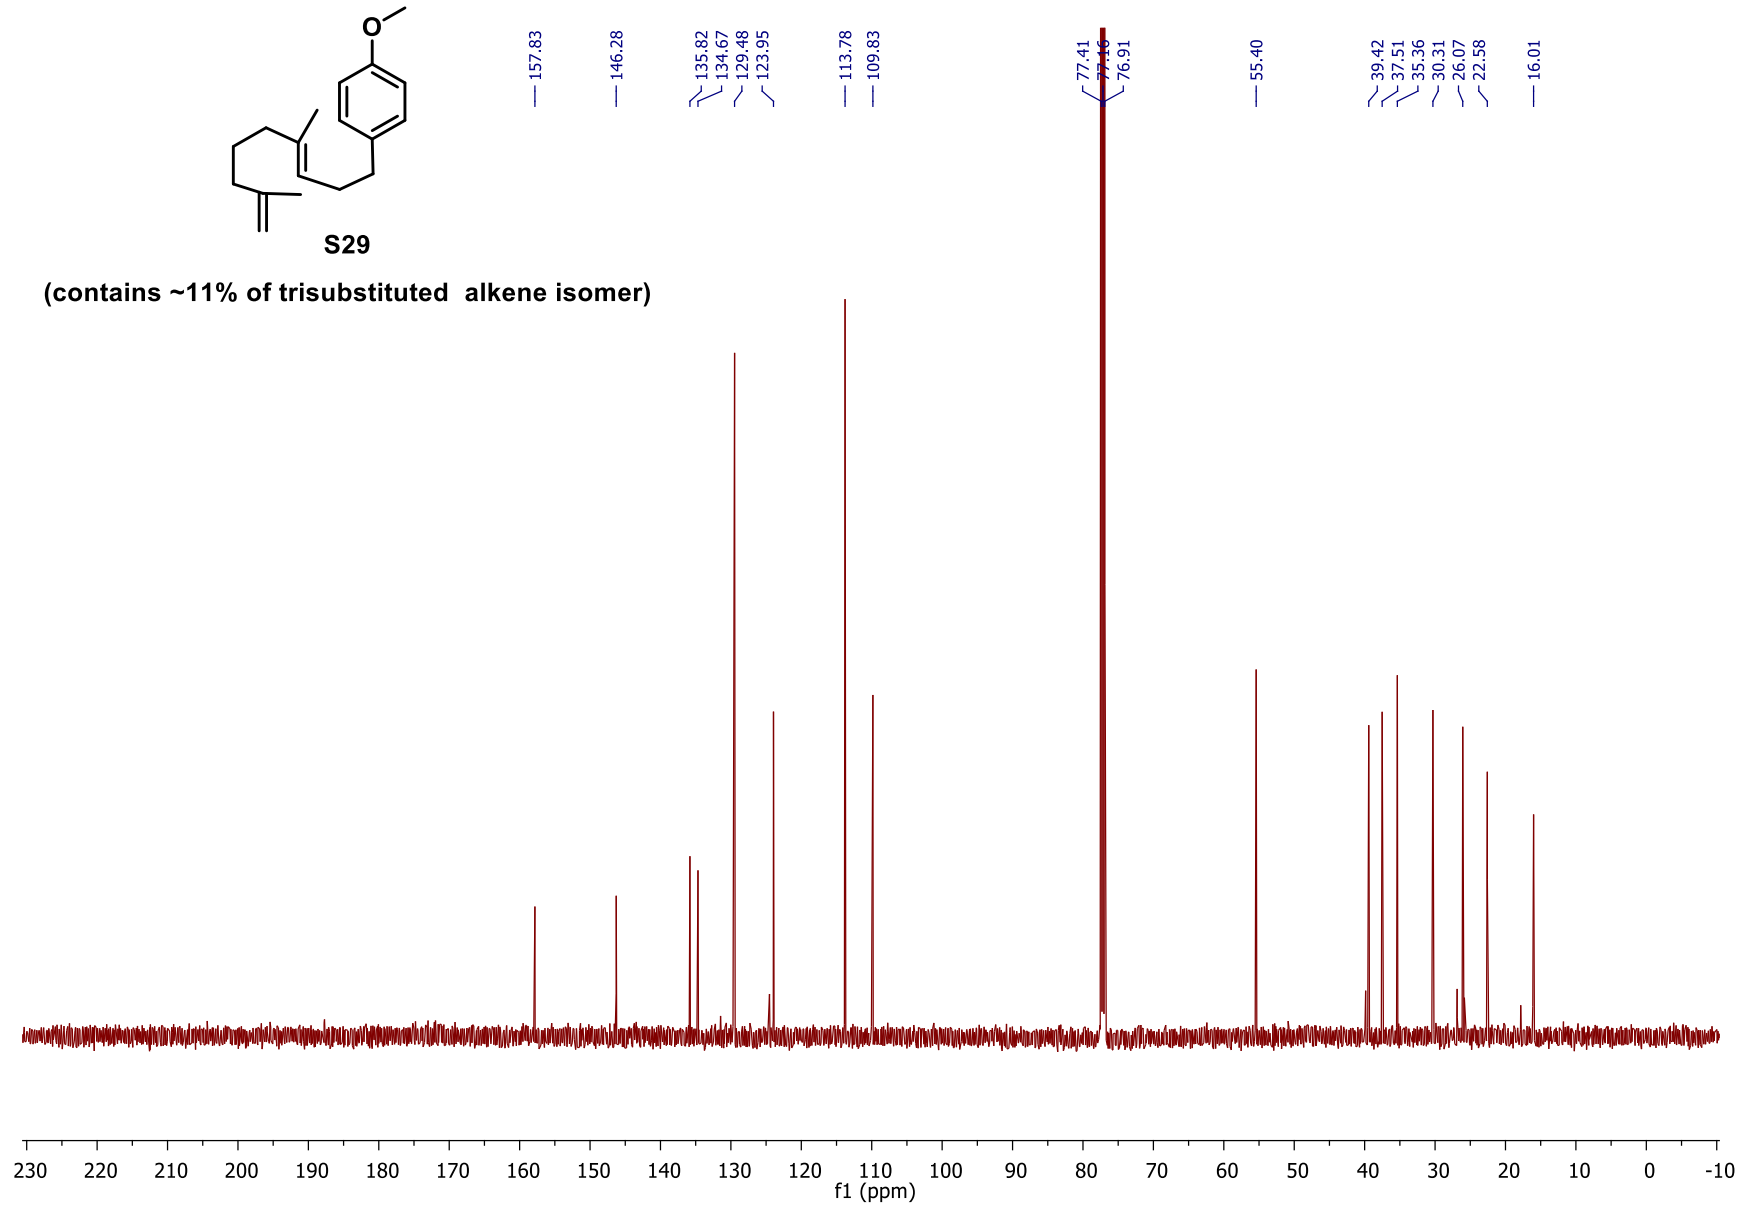

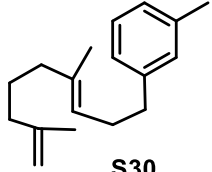

S30

(contains ~11% of trisubstituted alkene isomer)

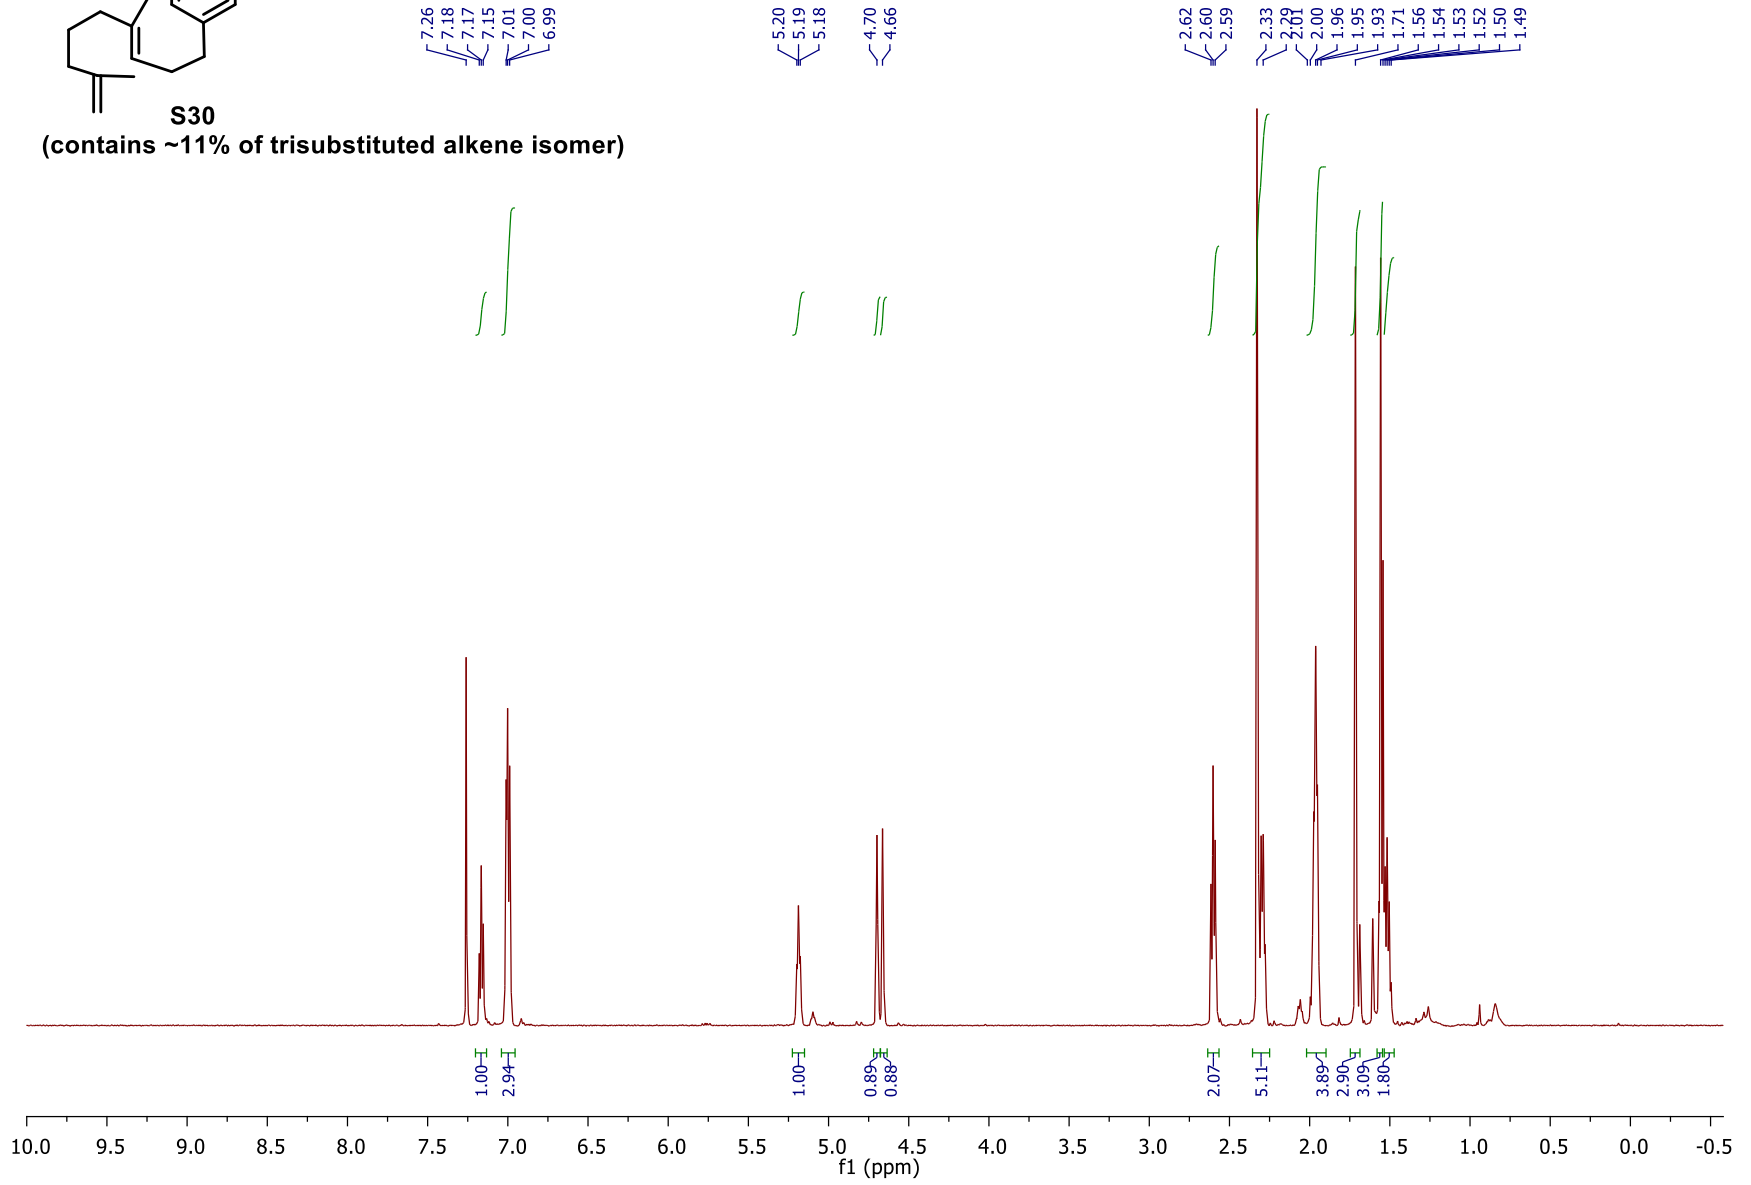

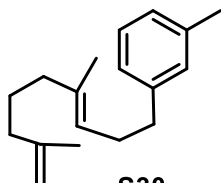

**S30**  
(contains ~11% of trisubstituted alkene isomer)

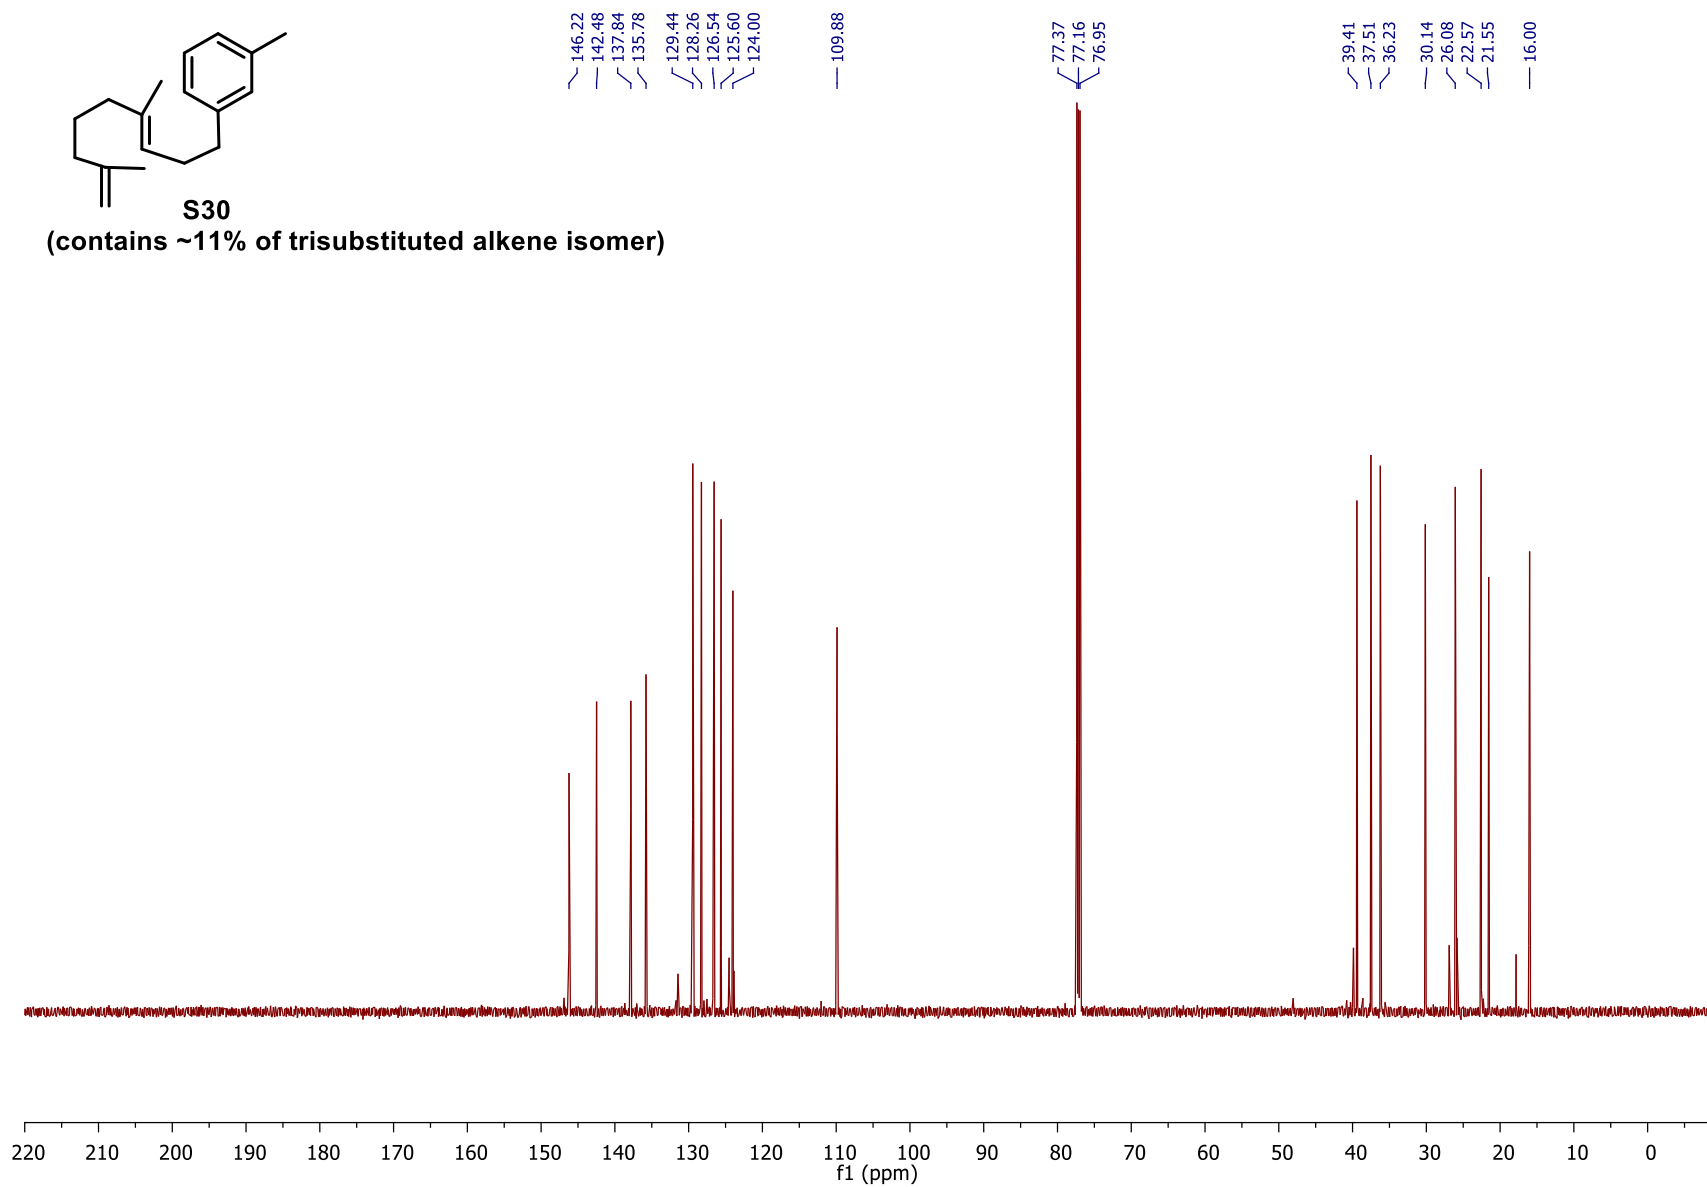

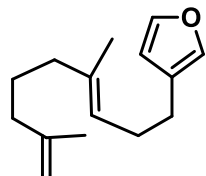

**S31**  
(contains ~11% of trisubstituted alkene isomer)

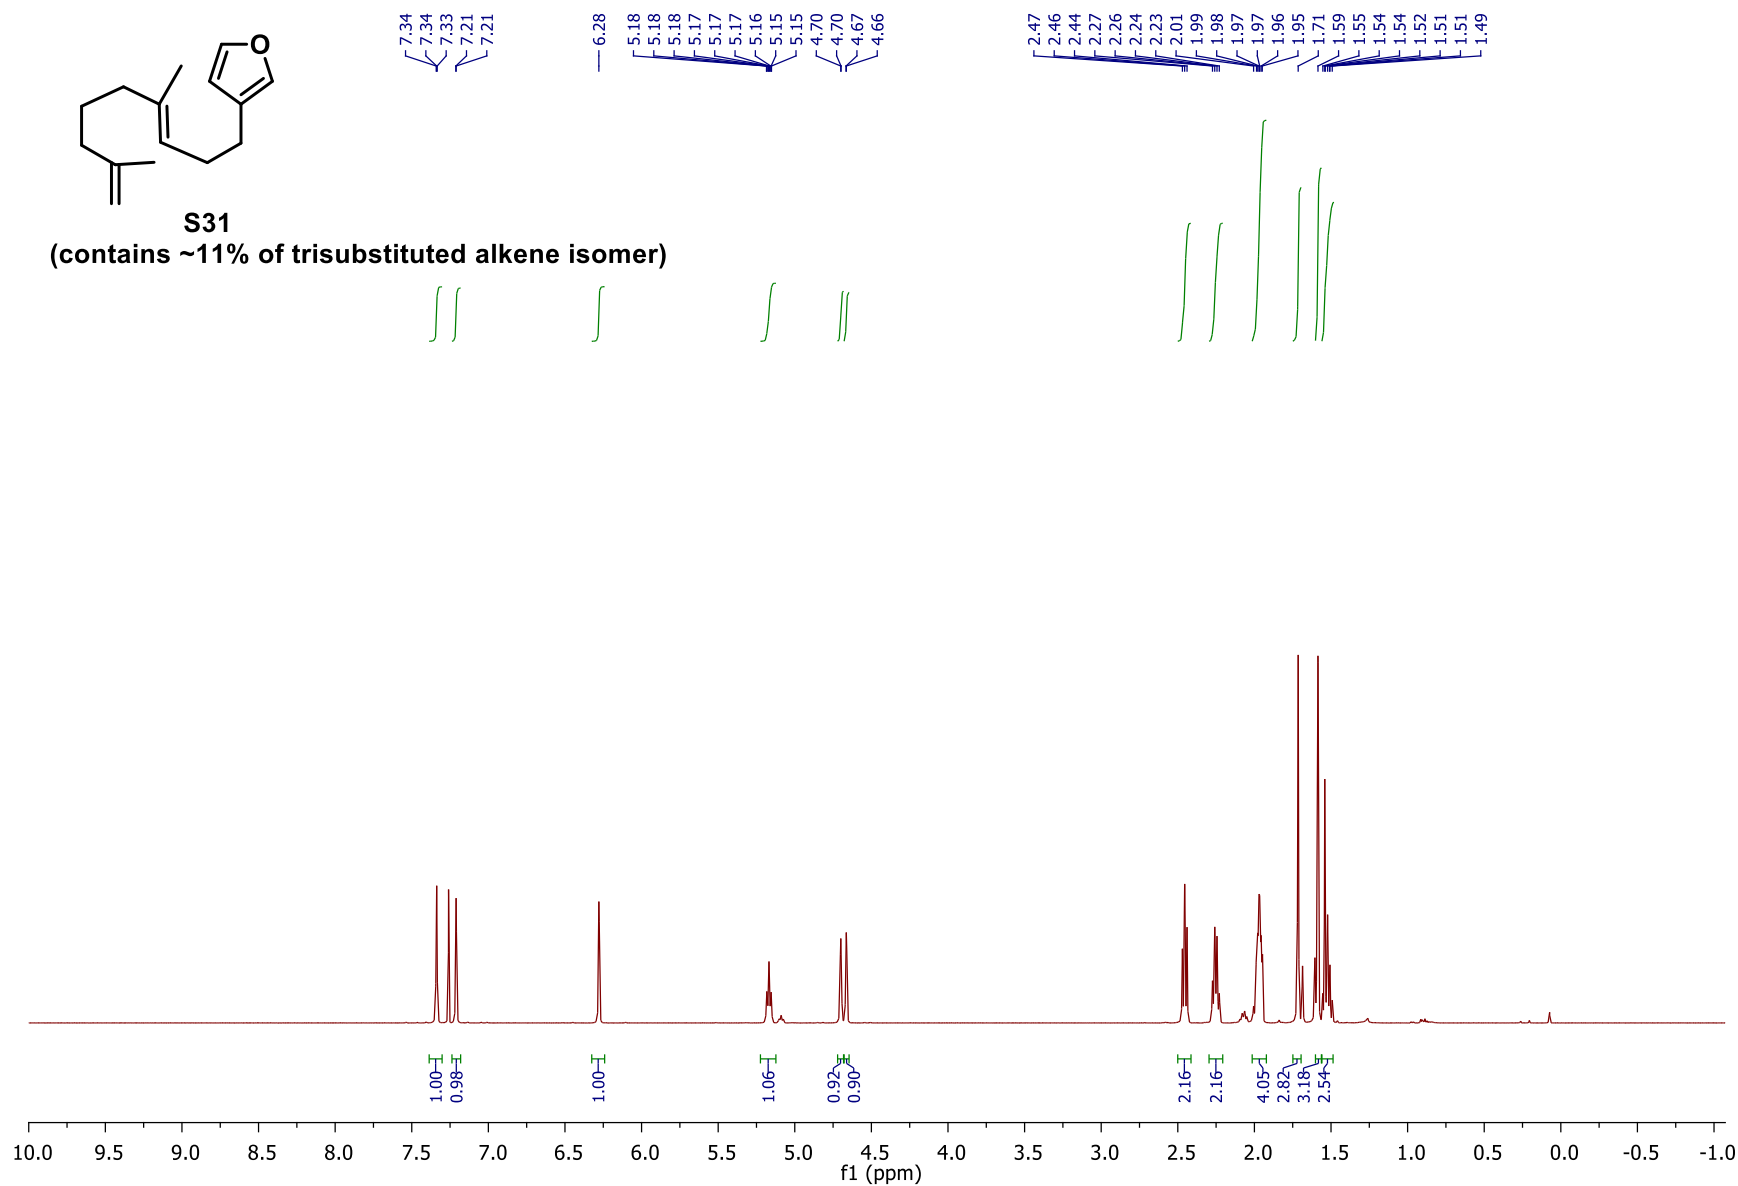

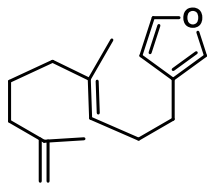

**S31**  
(contains ~11% of trisubstituted alkene isomer)

146.24  
142.70  
138.98  
135.91

125.13  
123.99

111.23  
109.87

77.41  
77.16  
76.91

39.39  
37.49

28.57  
26.04  
25.20  
22.57  
16.08

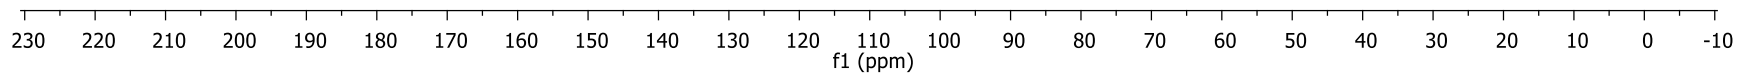

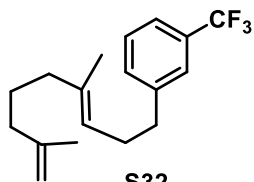

(contains ~11% of trisubstituted alkene isomer)

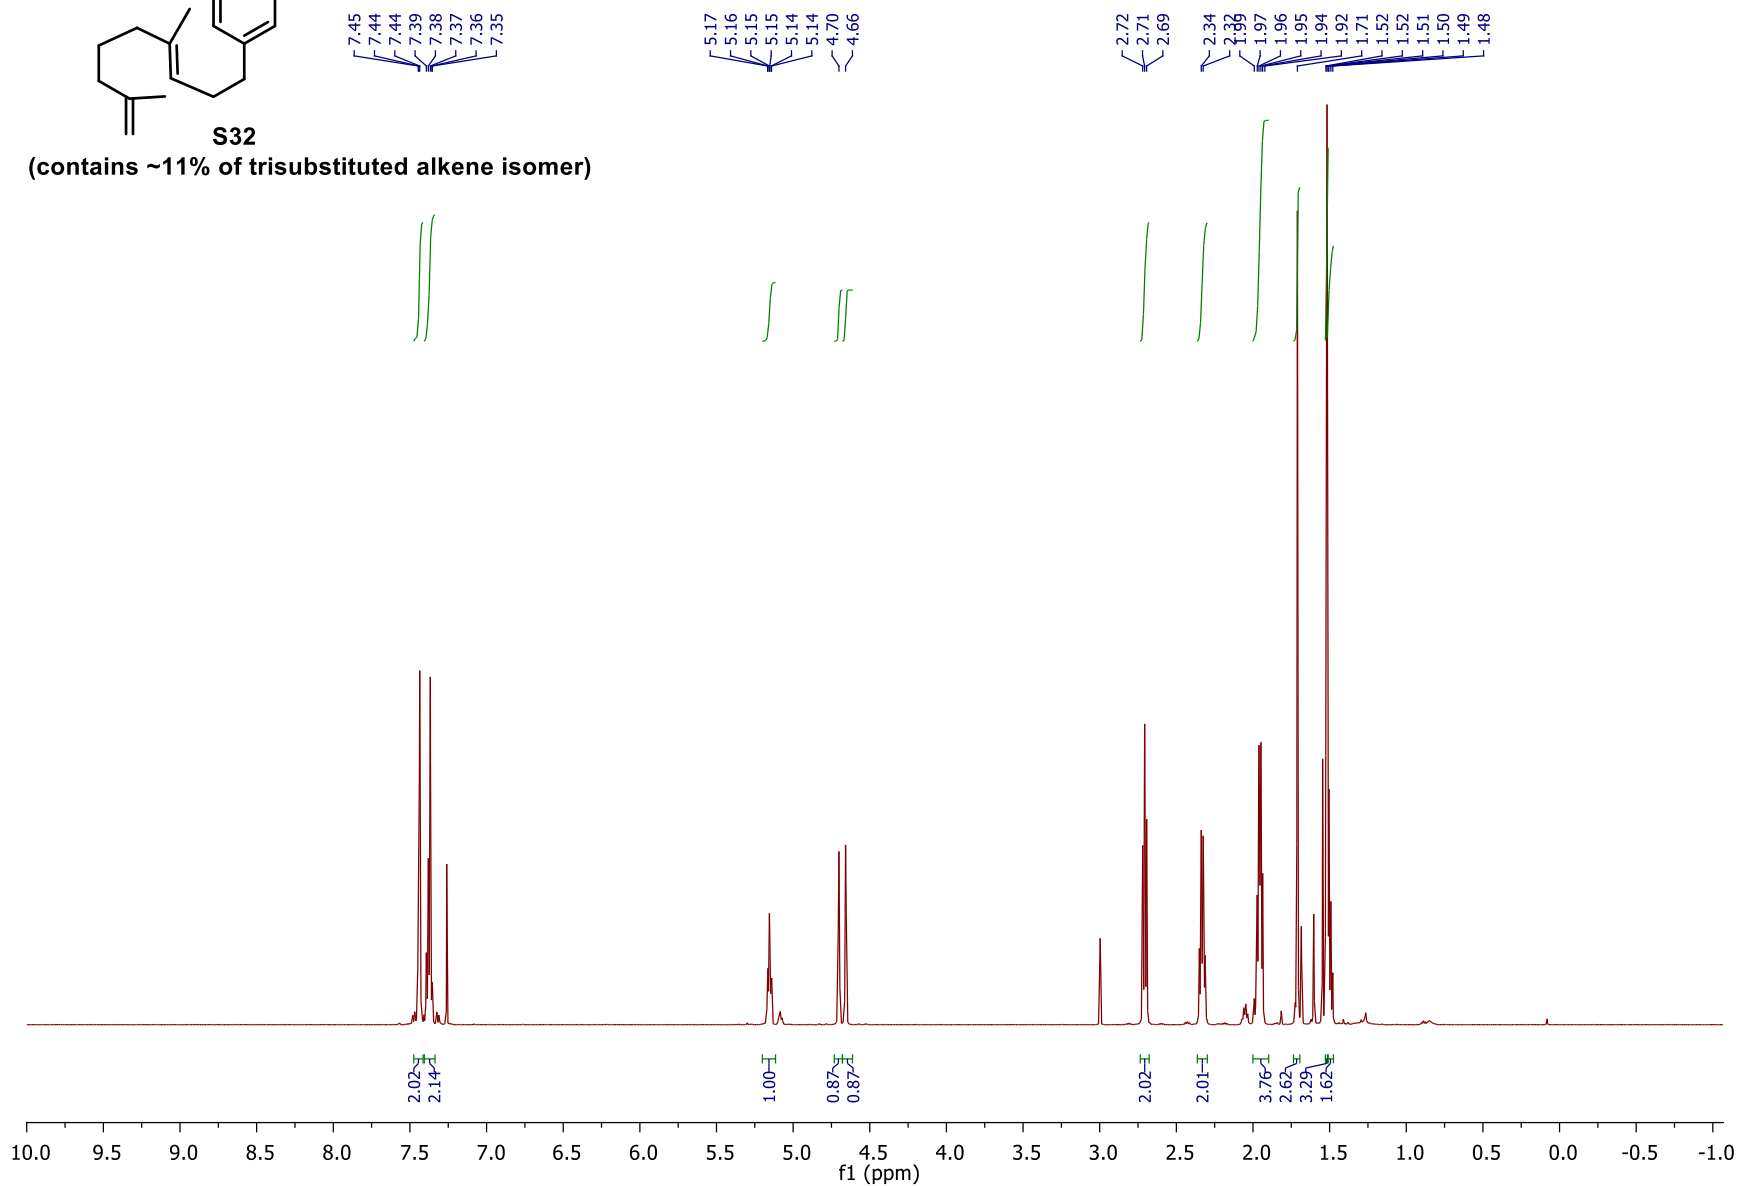

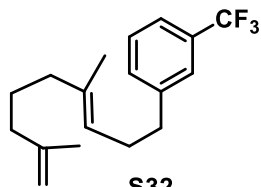

(contains ~11% of trisubstituted alkene isomer)

- 146.06
- 143.19
- 136.50
- 131.98
- 130.40
- 128.59
- 125.26
- 125.24
- 125.21
- 122.99
- 122.61
- 122.58
- 108.98

- 77.26
- 77.05
- 76.84

- 39.26
- 37.38
- 35.88
- 29.60
- 25.91
- 22.42
- 15.87

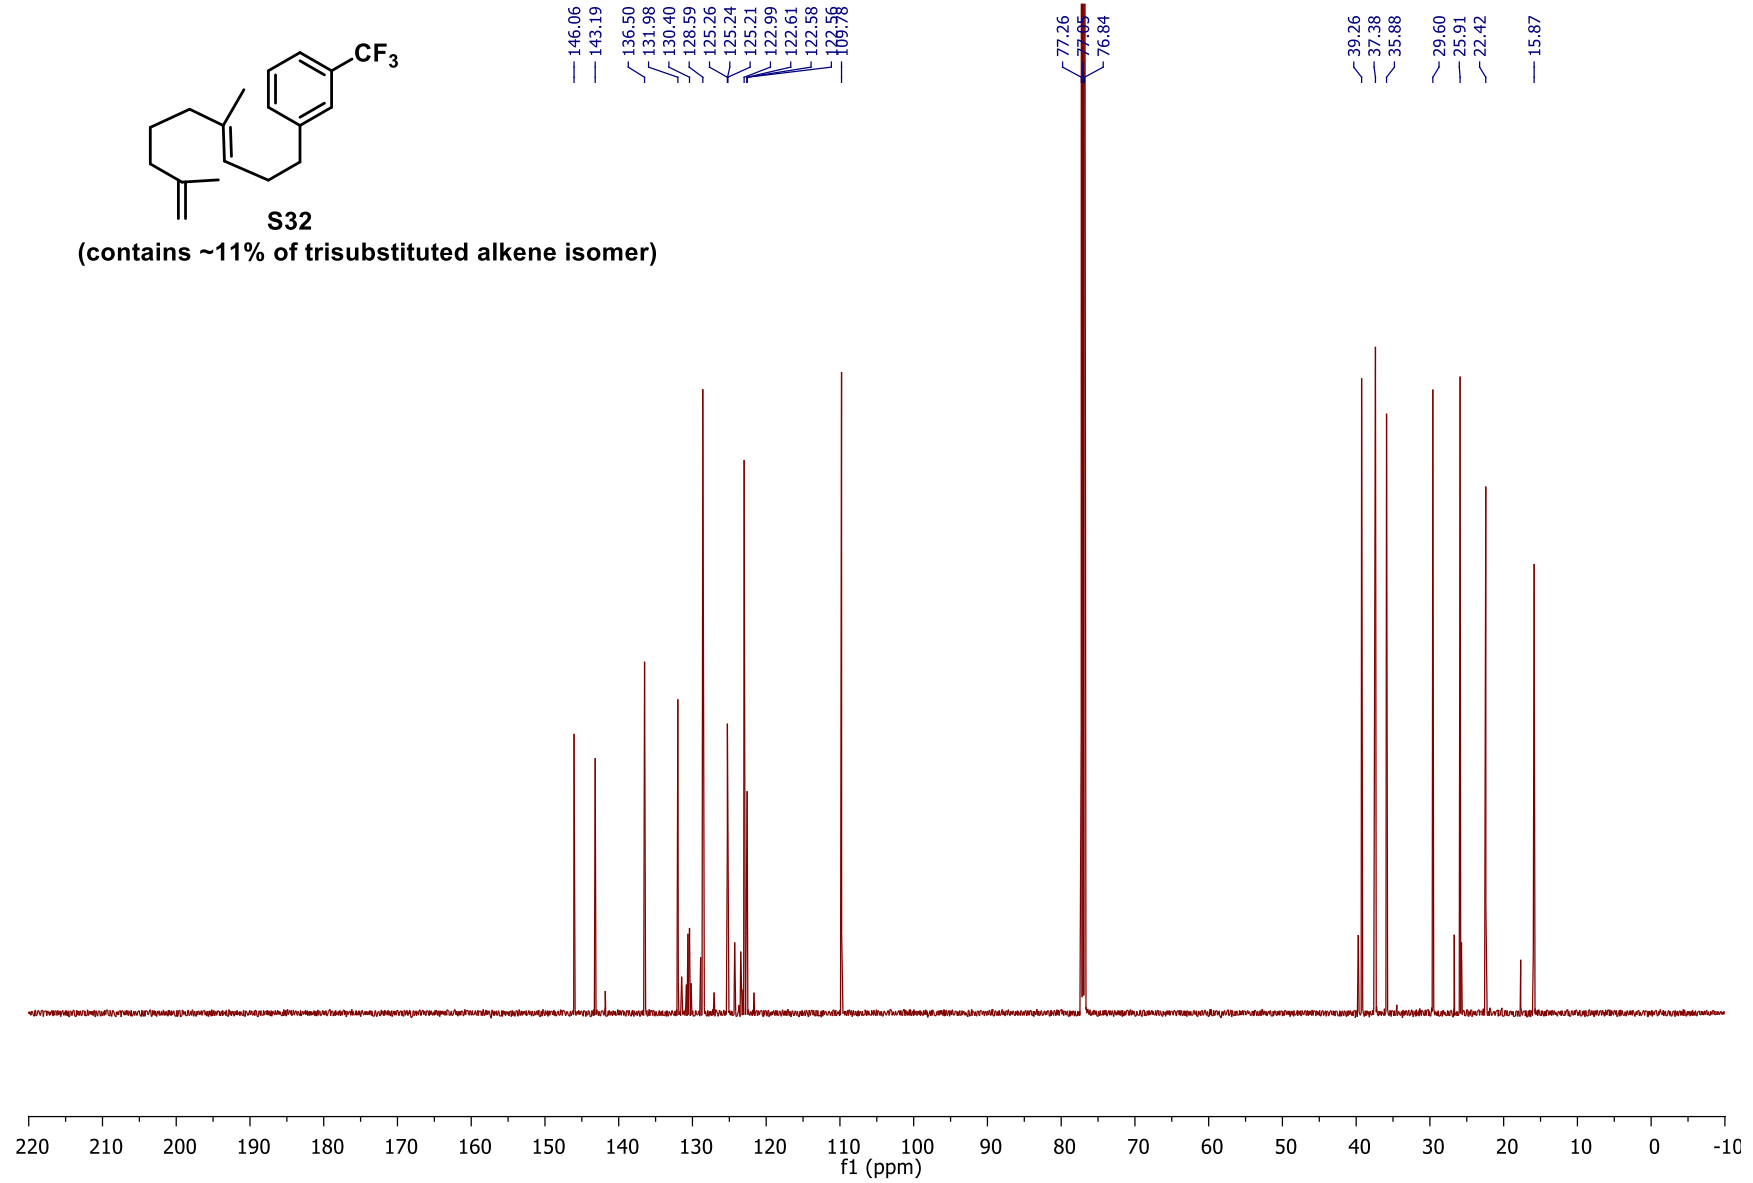

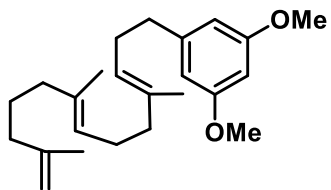

S34

(contains ~11% of trisubstituted alkene isomer)

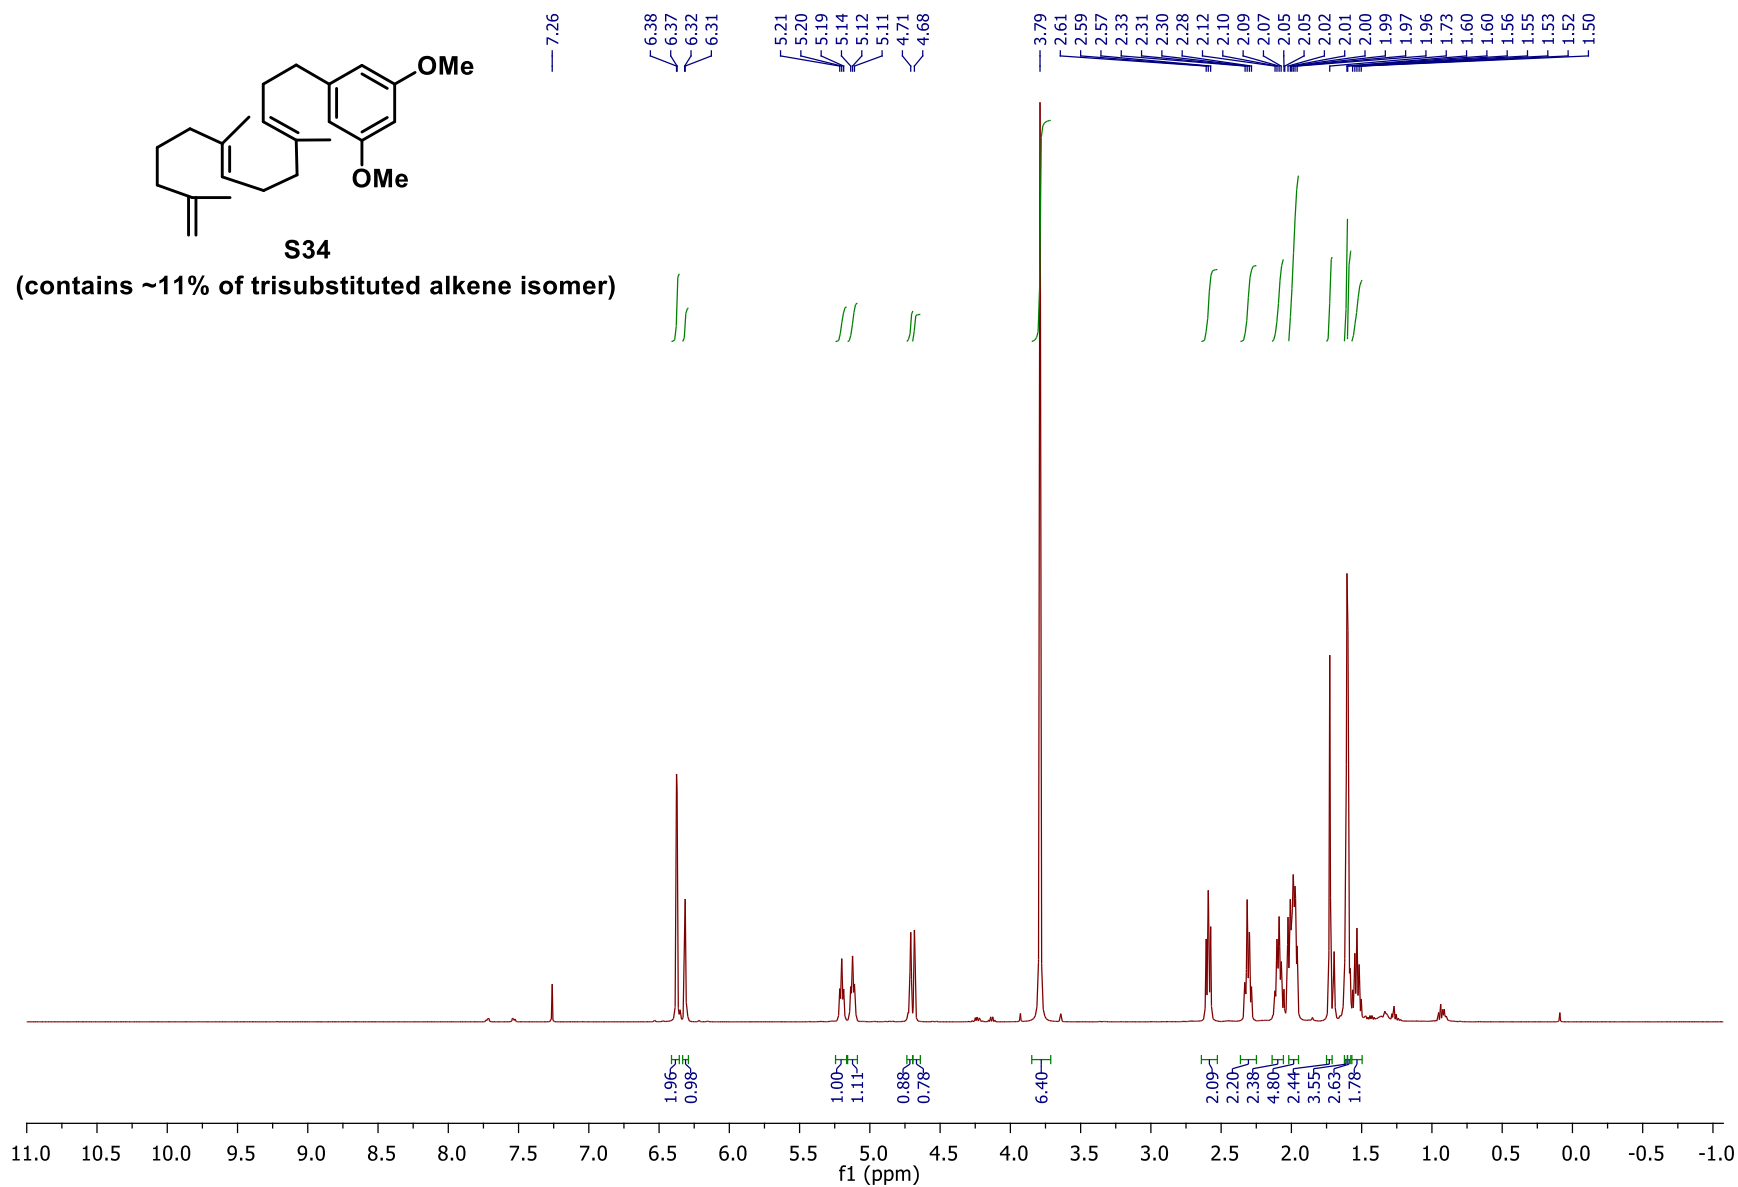



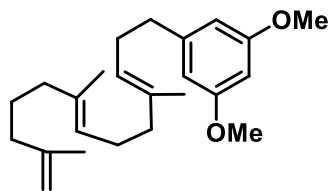

S34

(contains ~11% of trisubstituted alkene isomer)

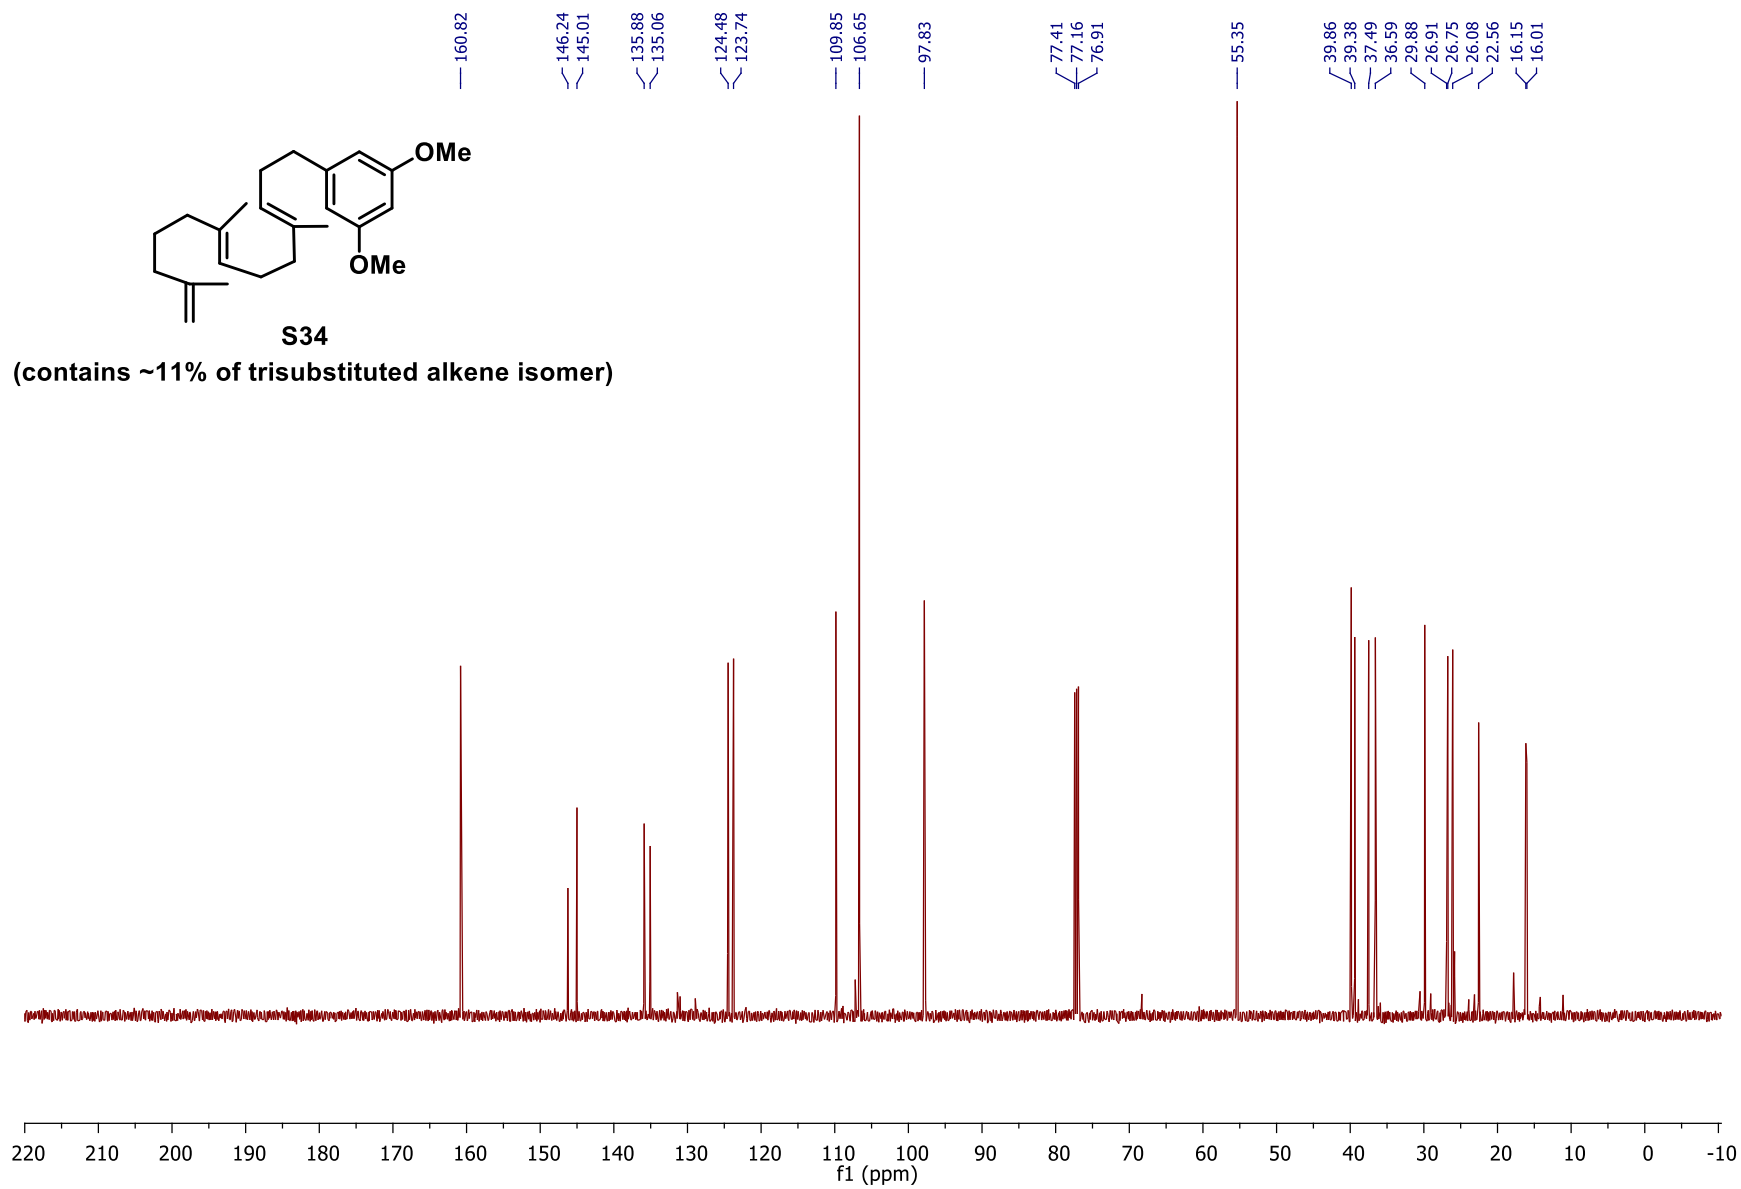

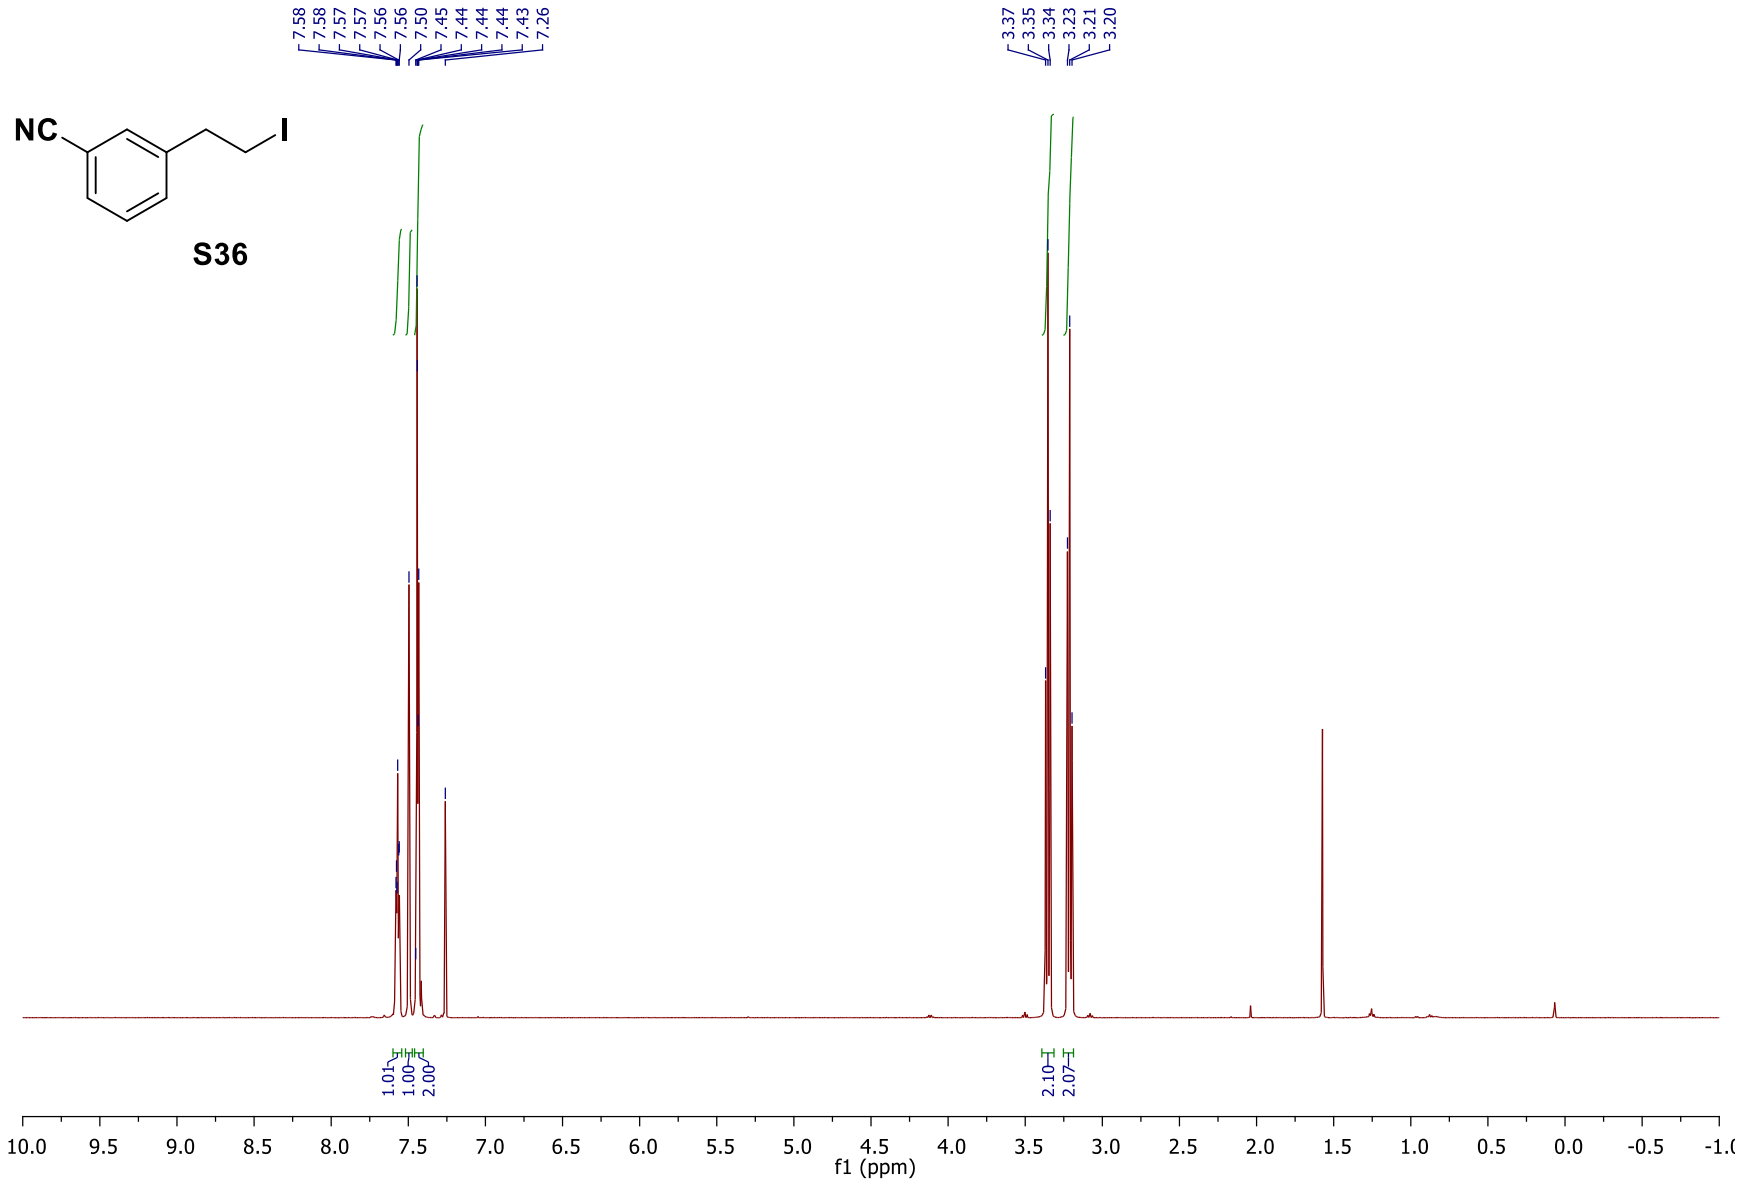

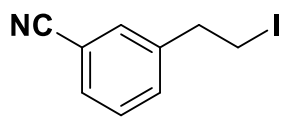

S36

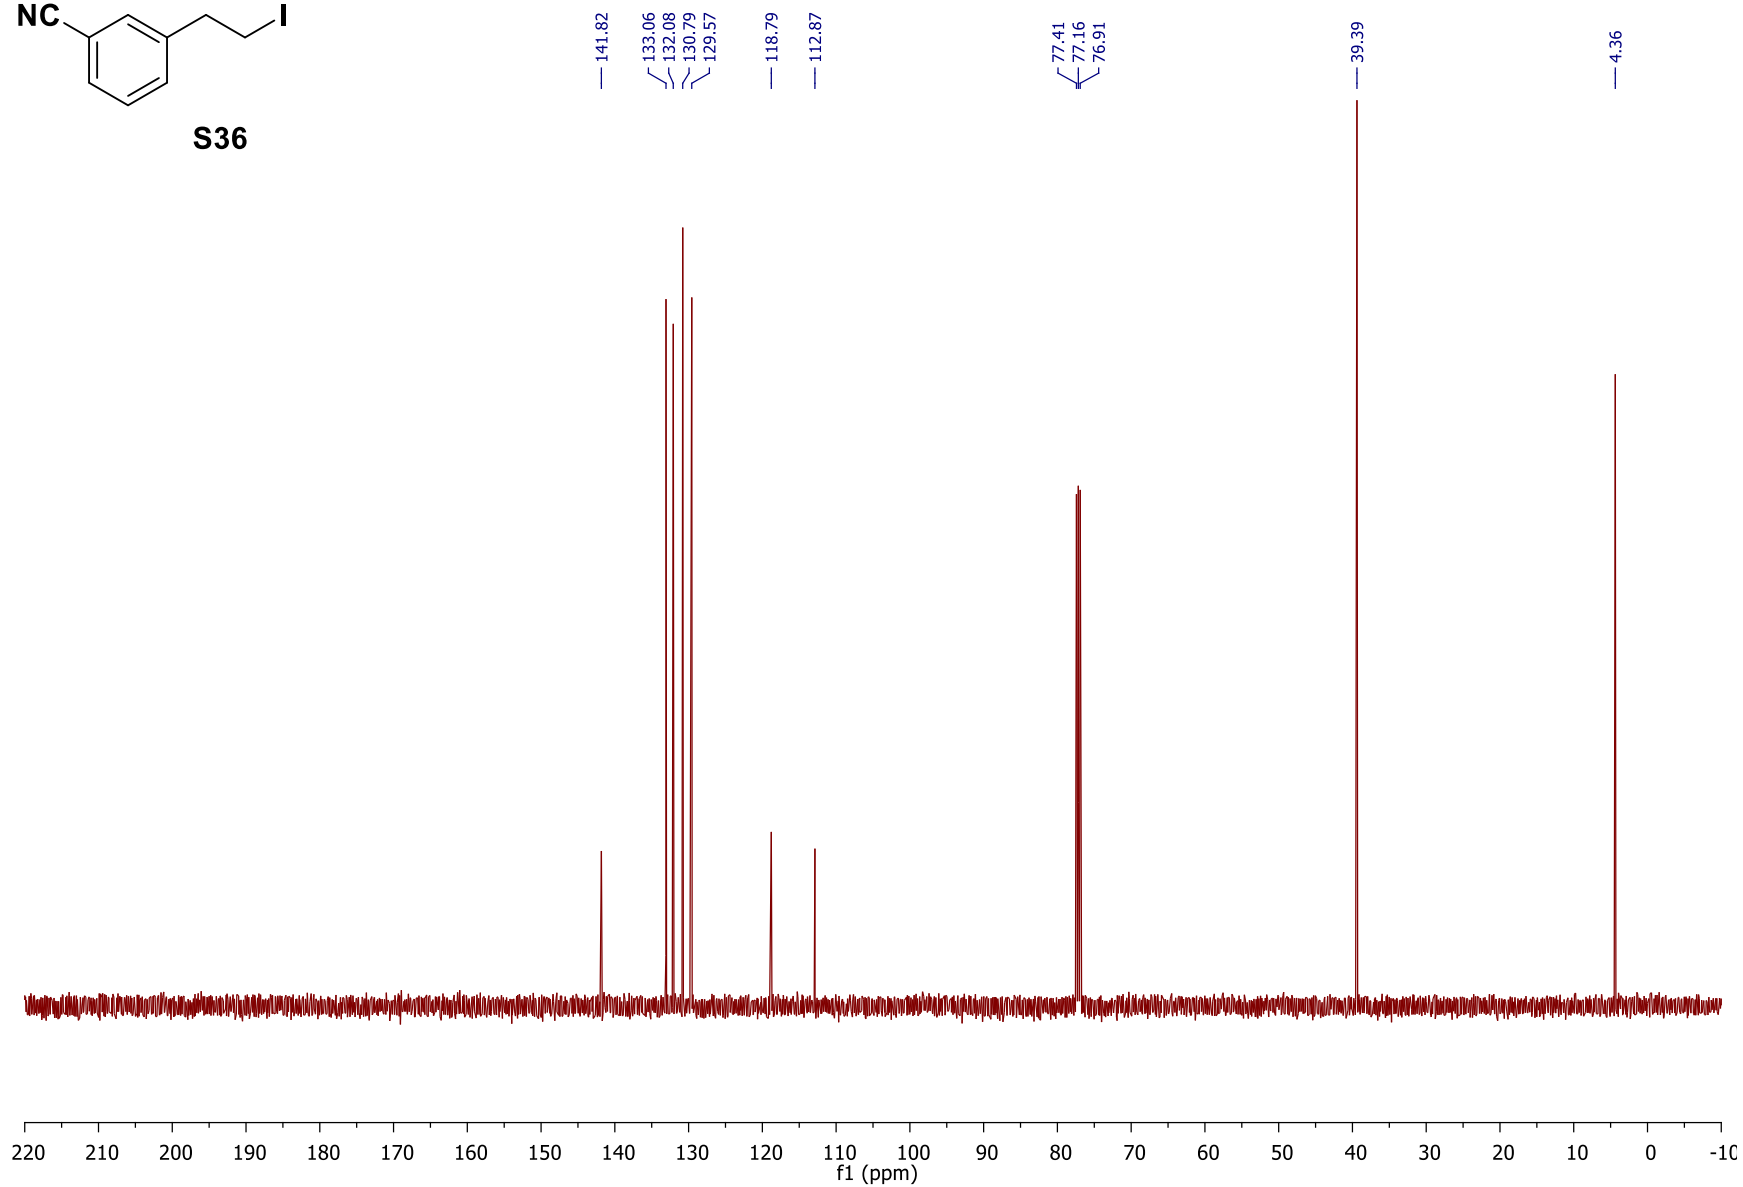

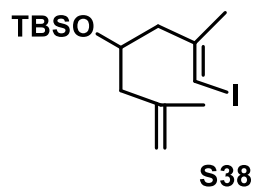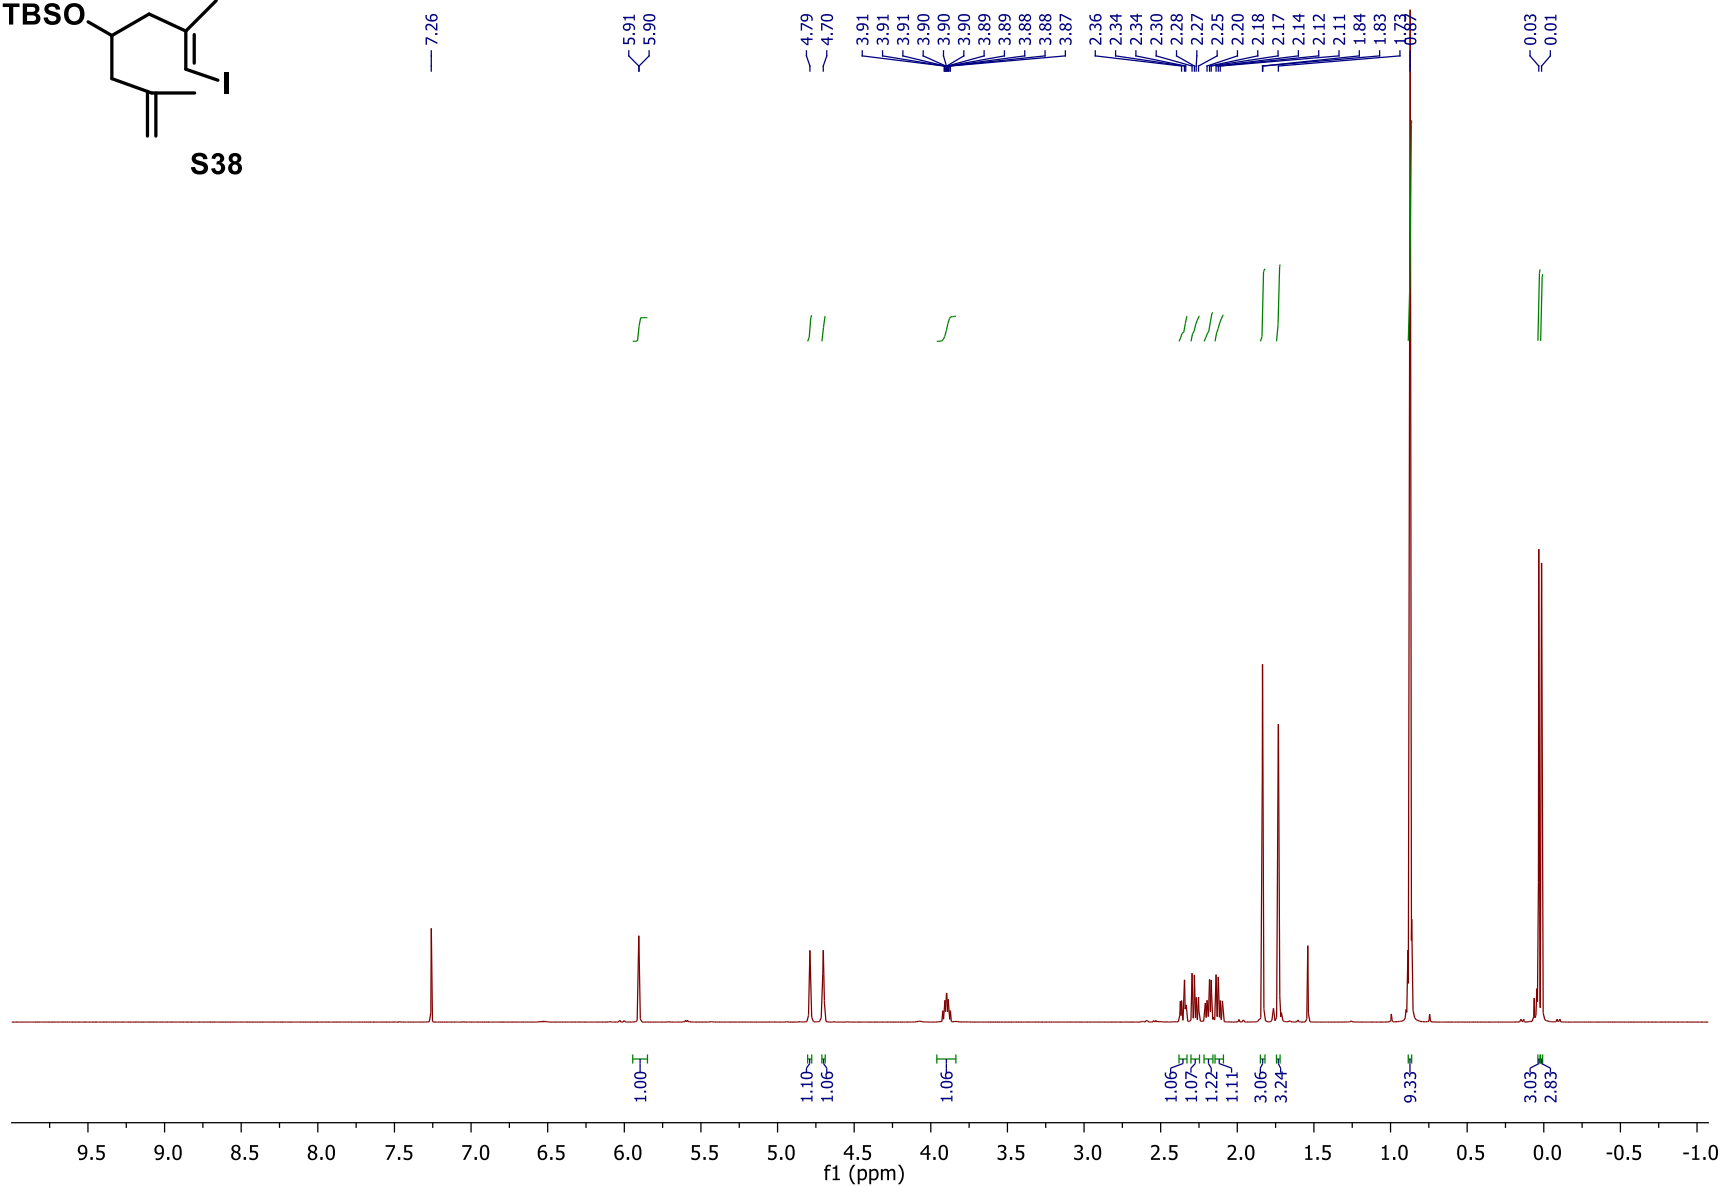

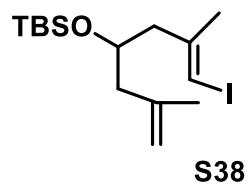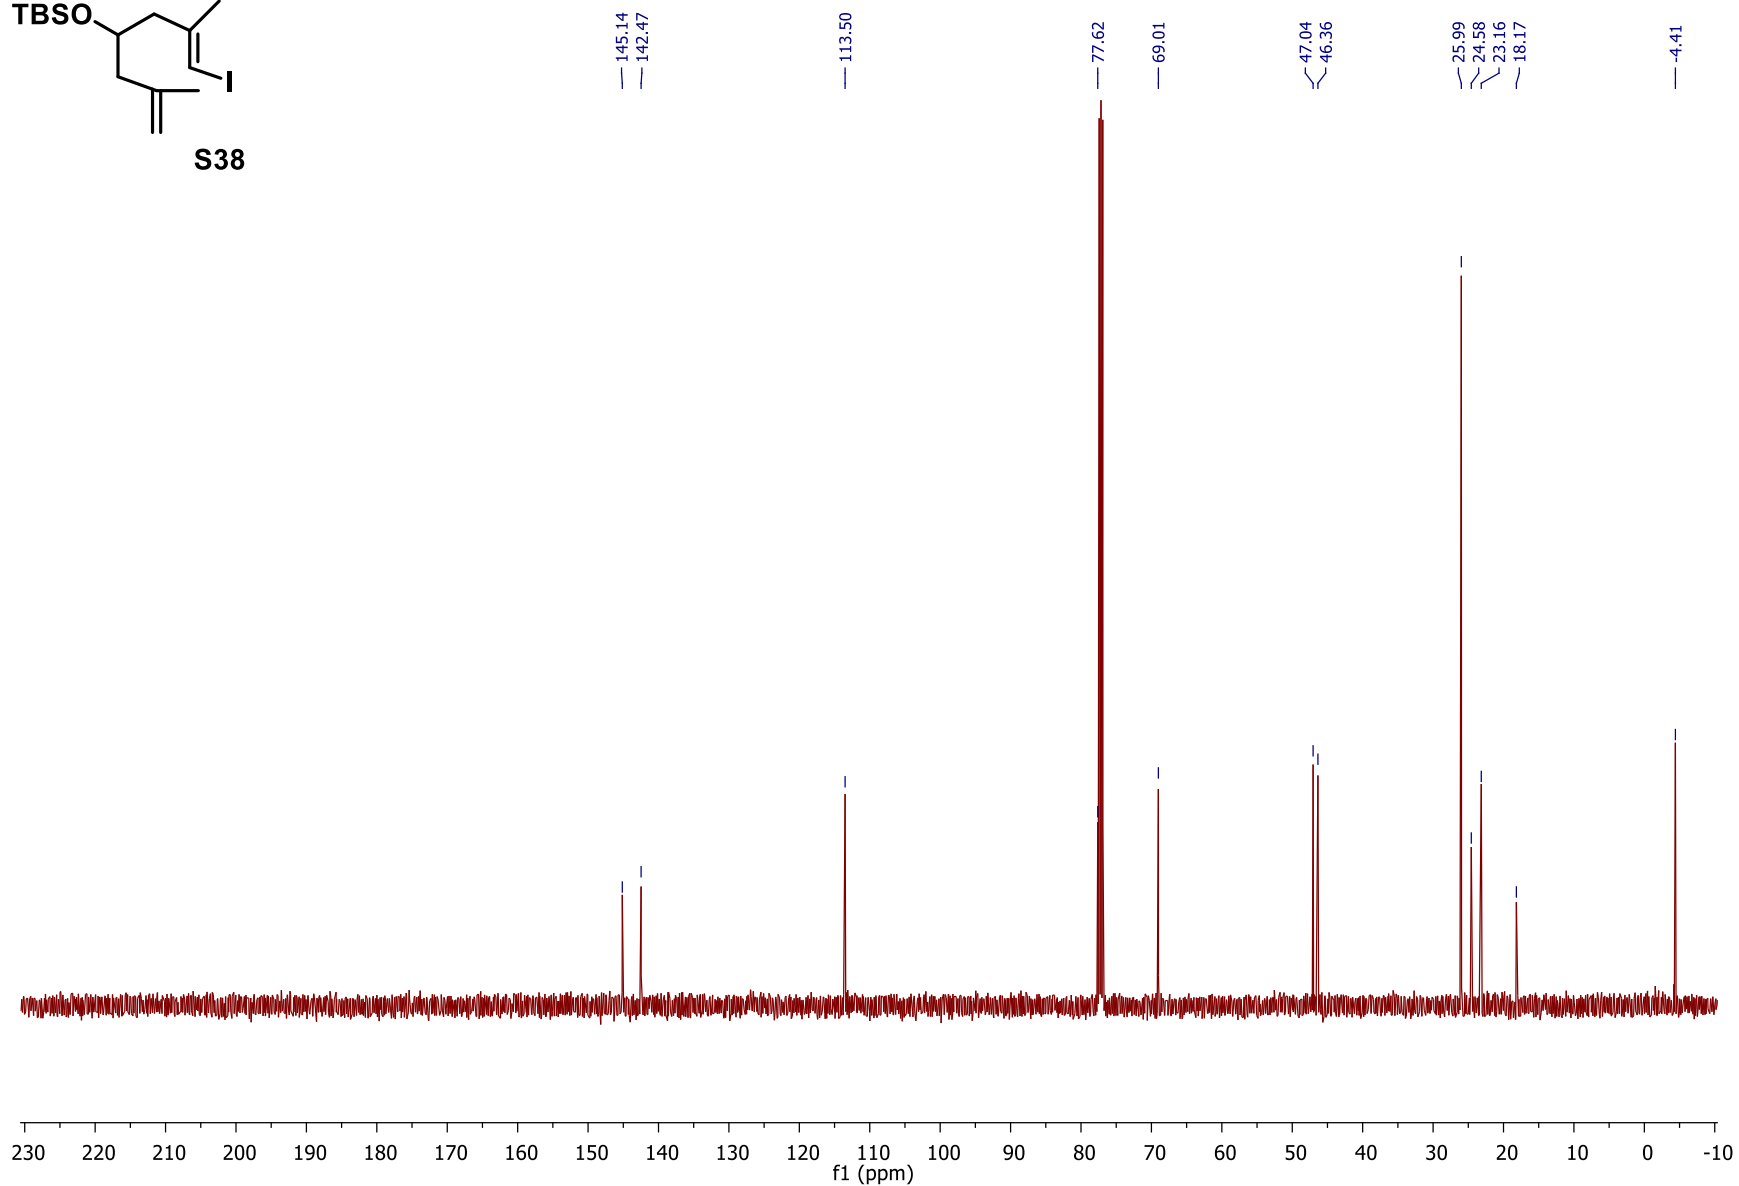

S145

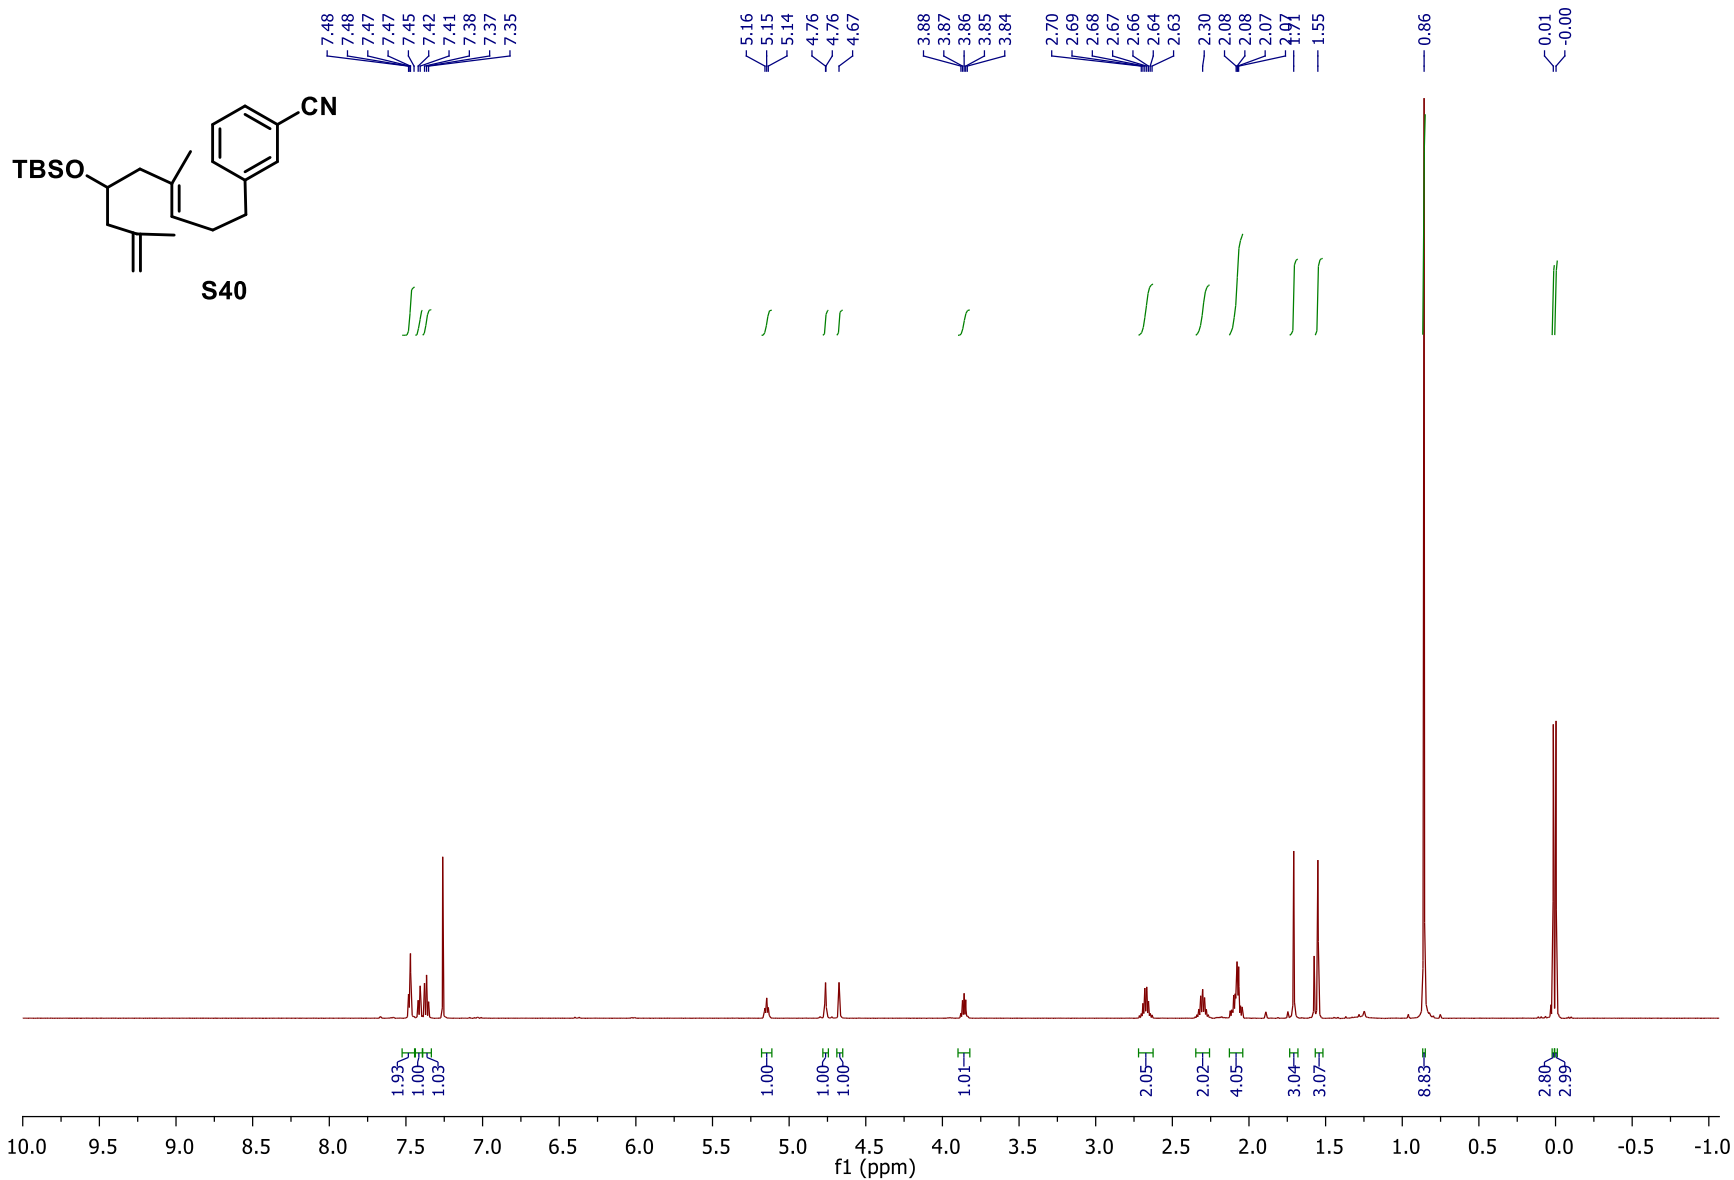

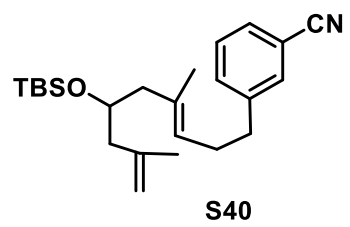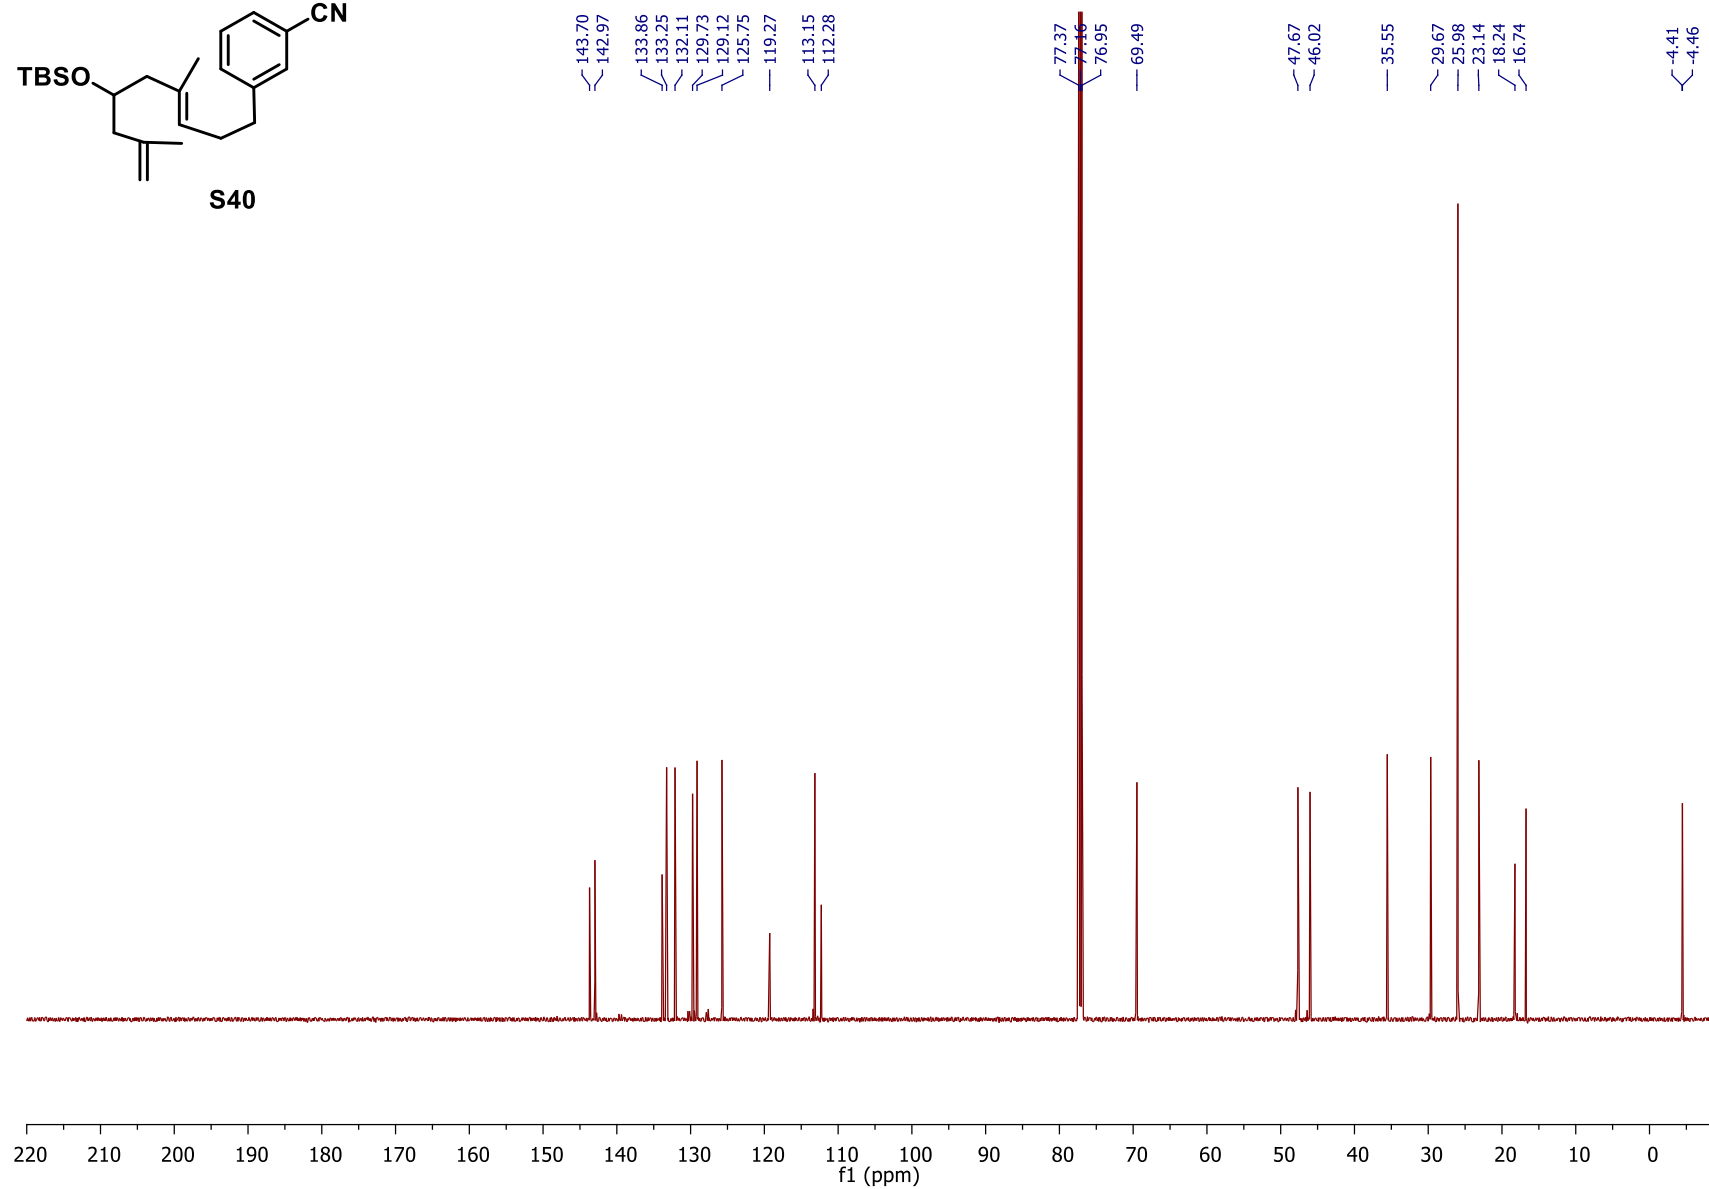

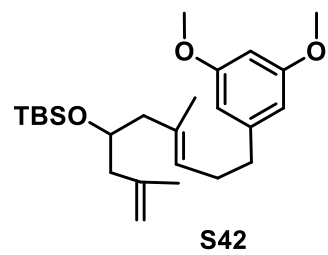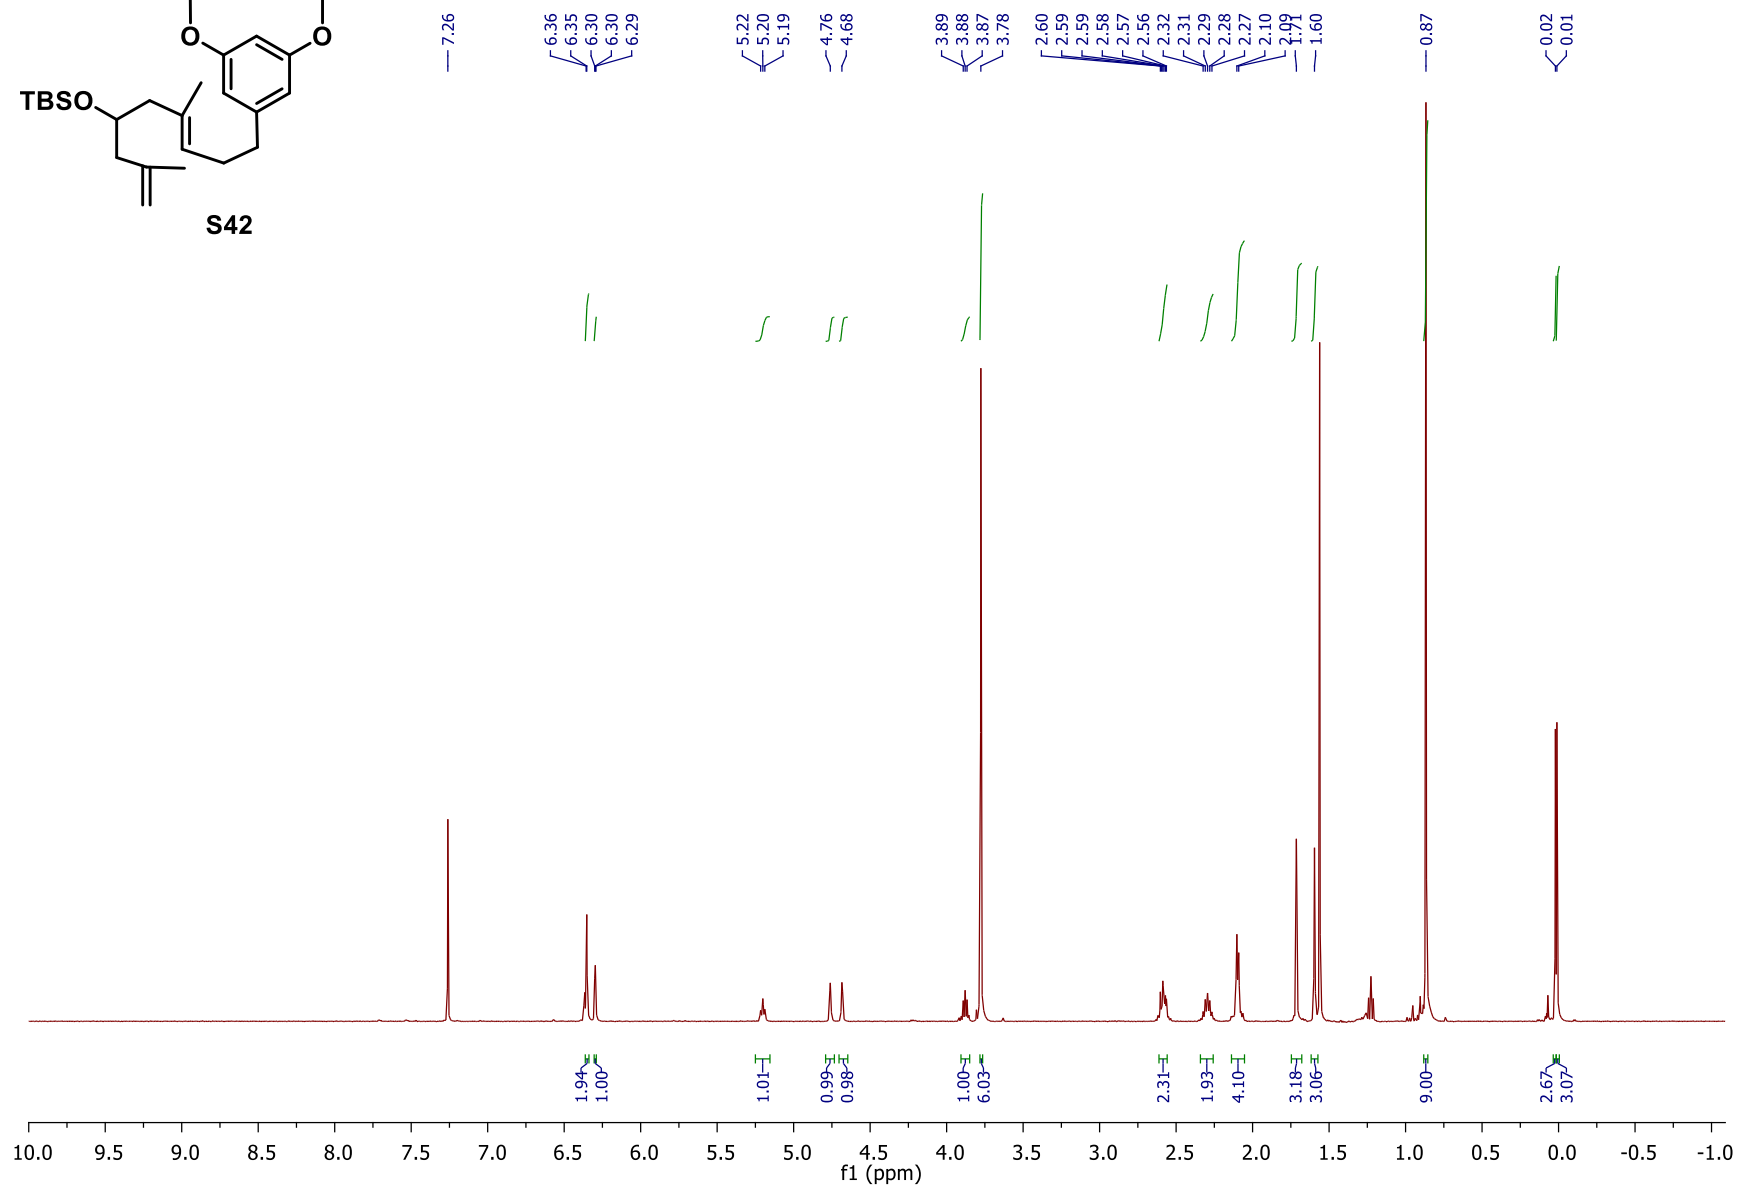





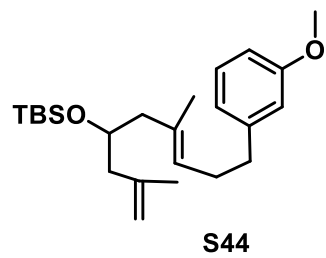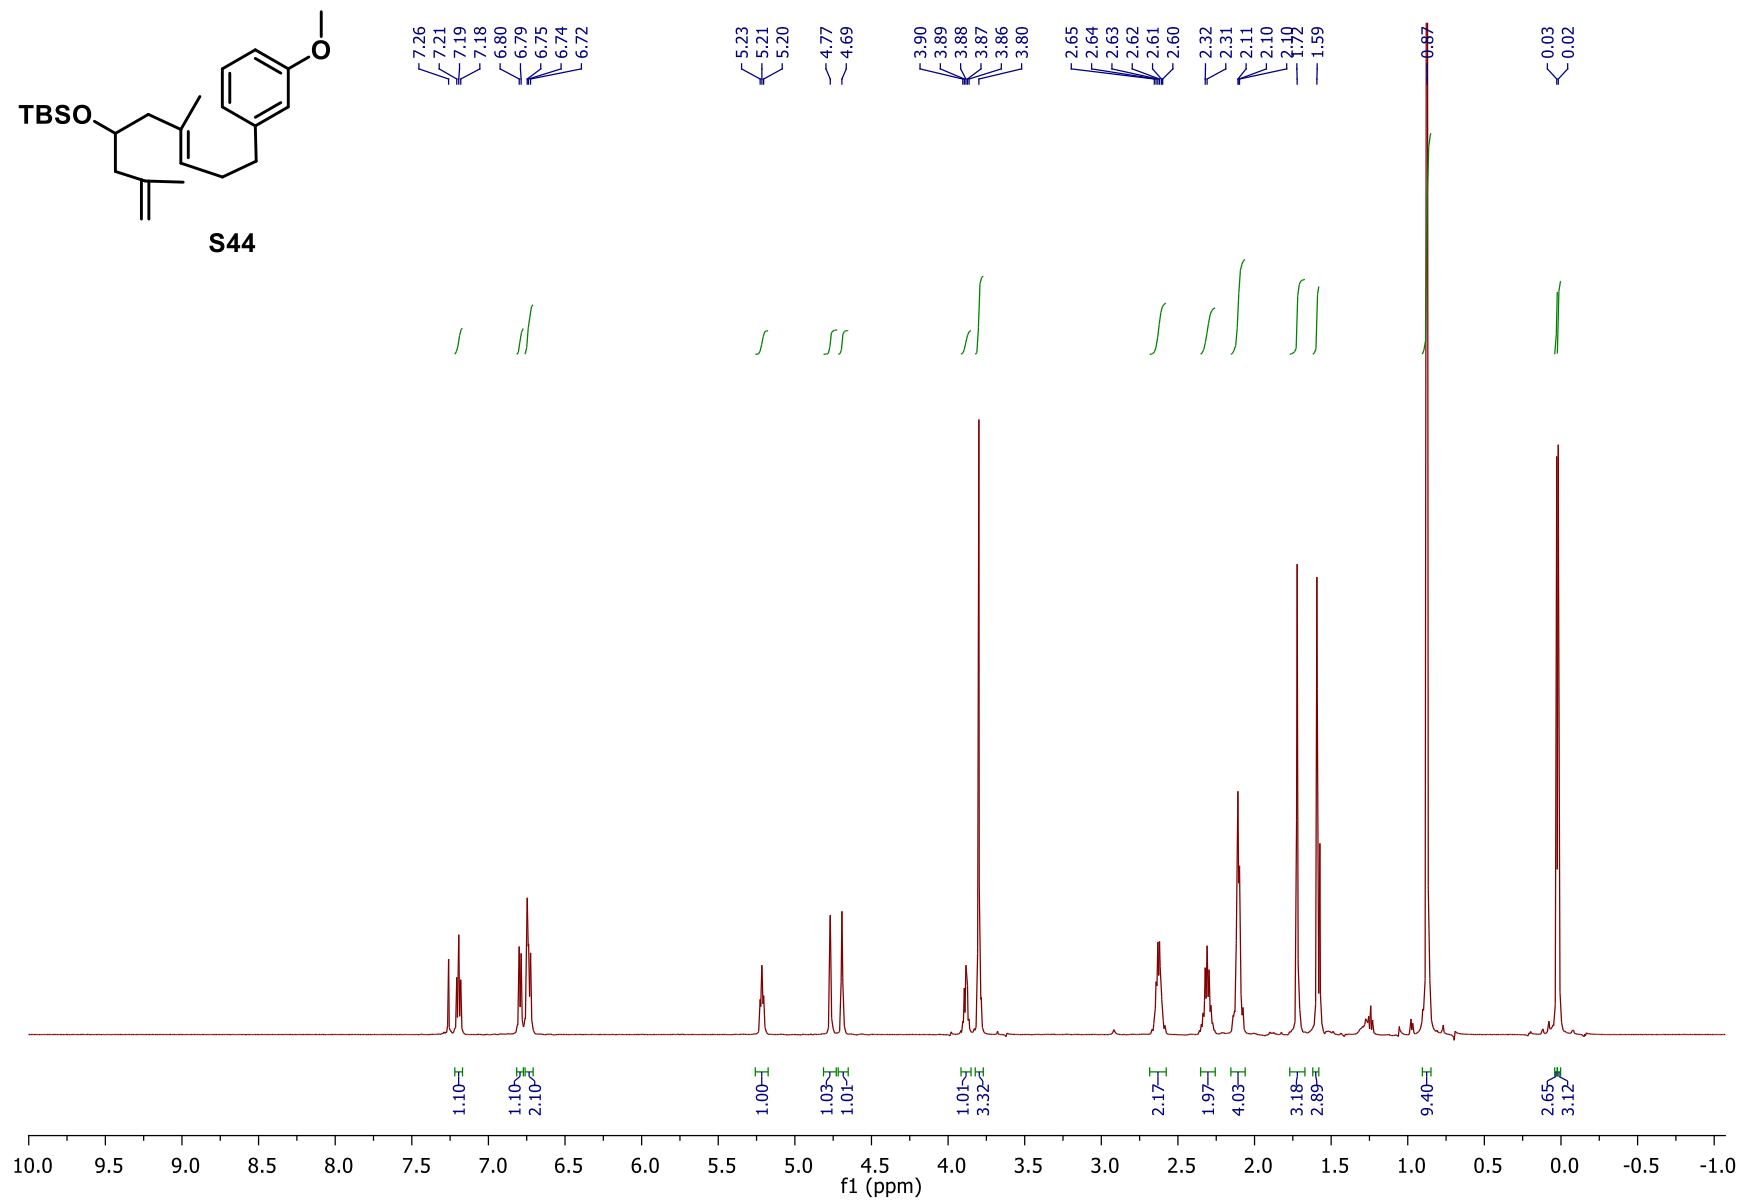

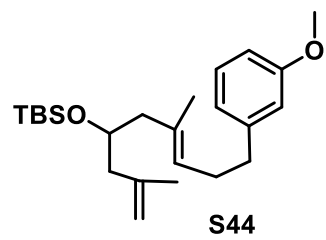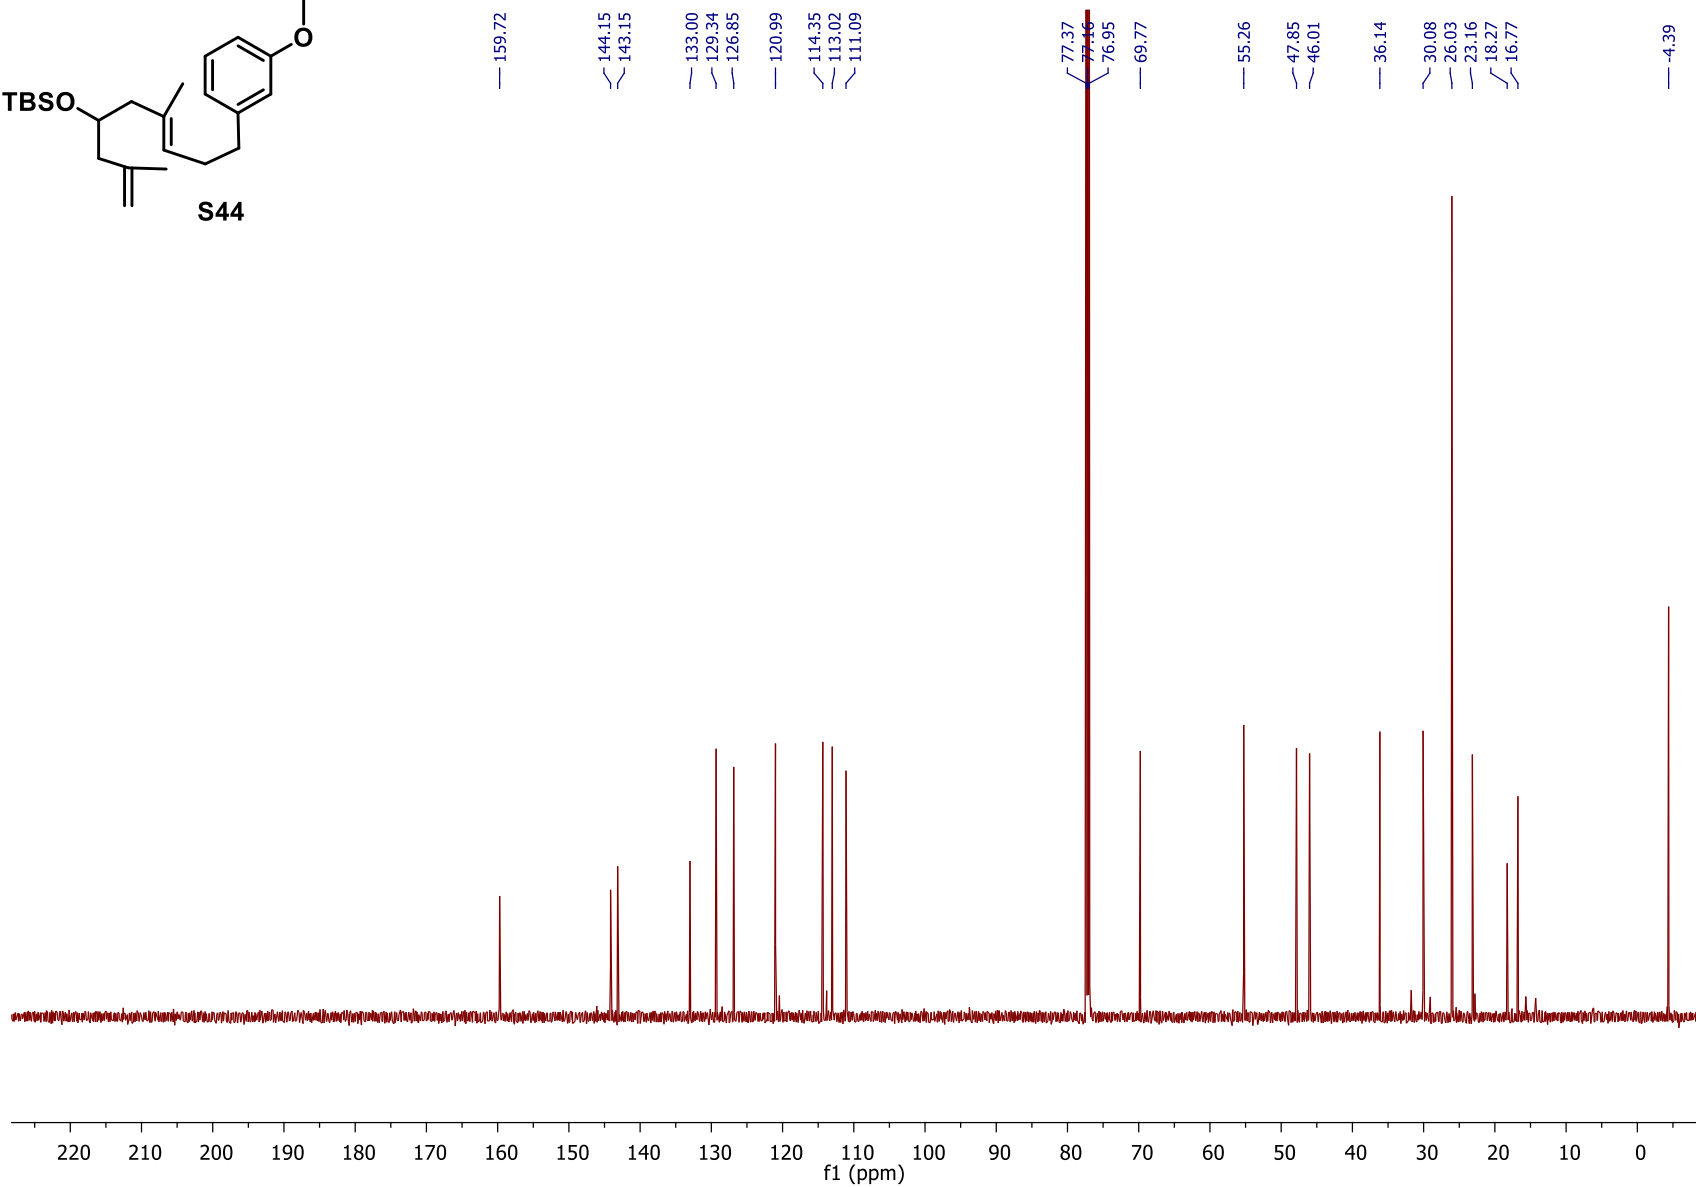

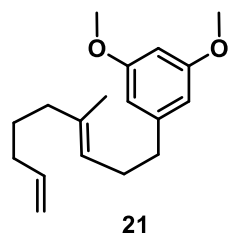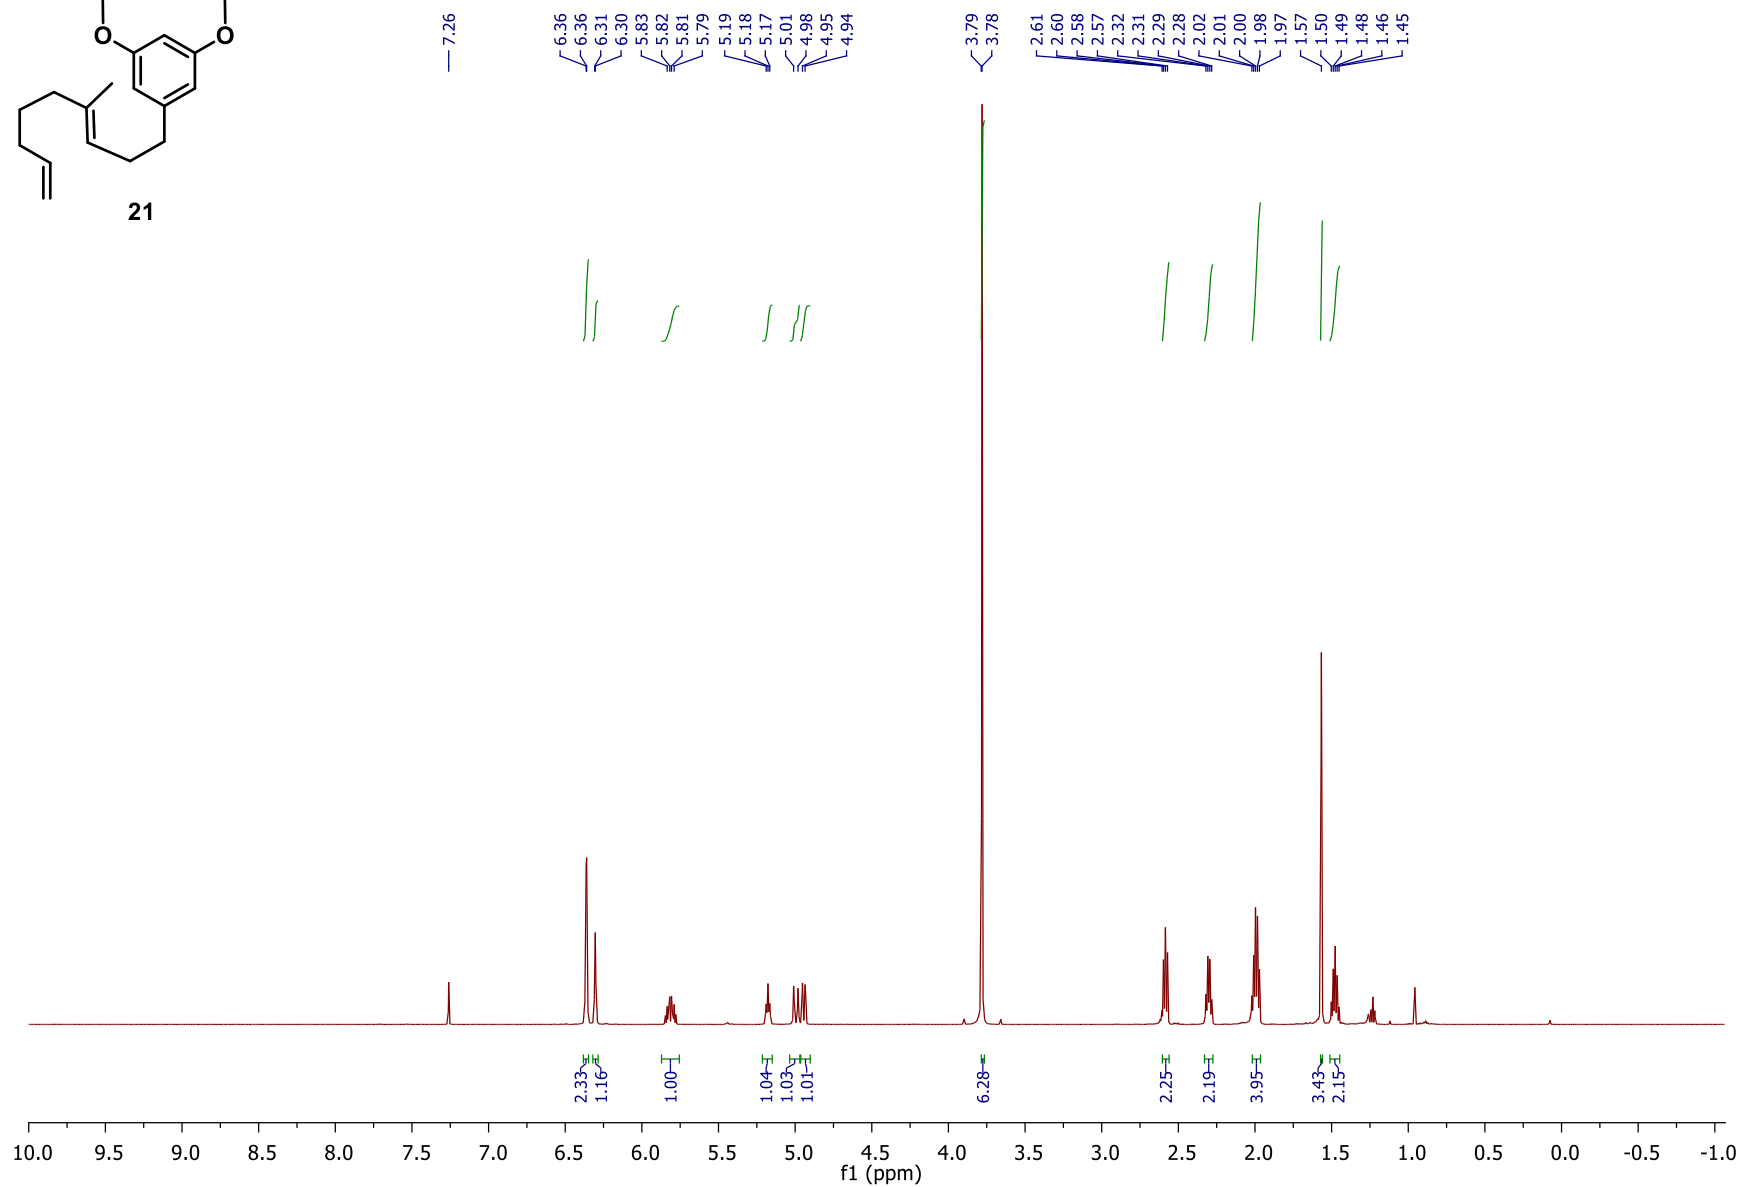

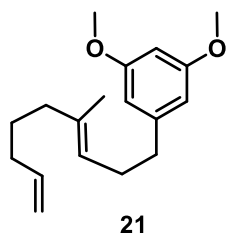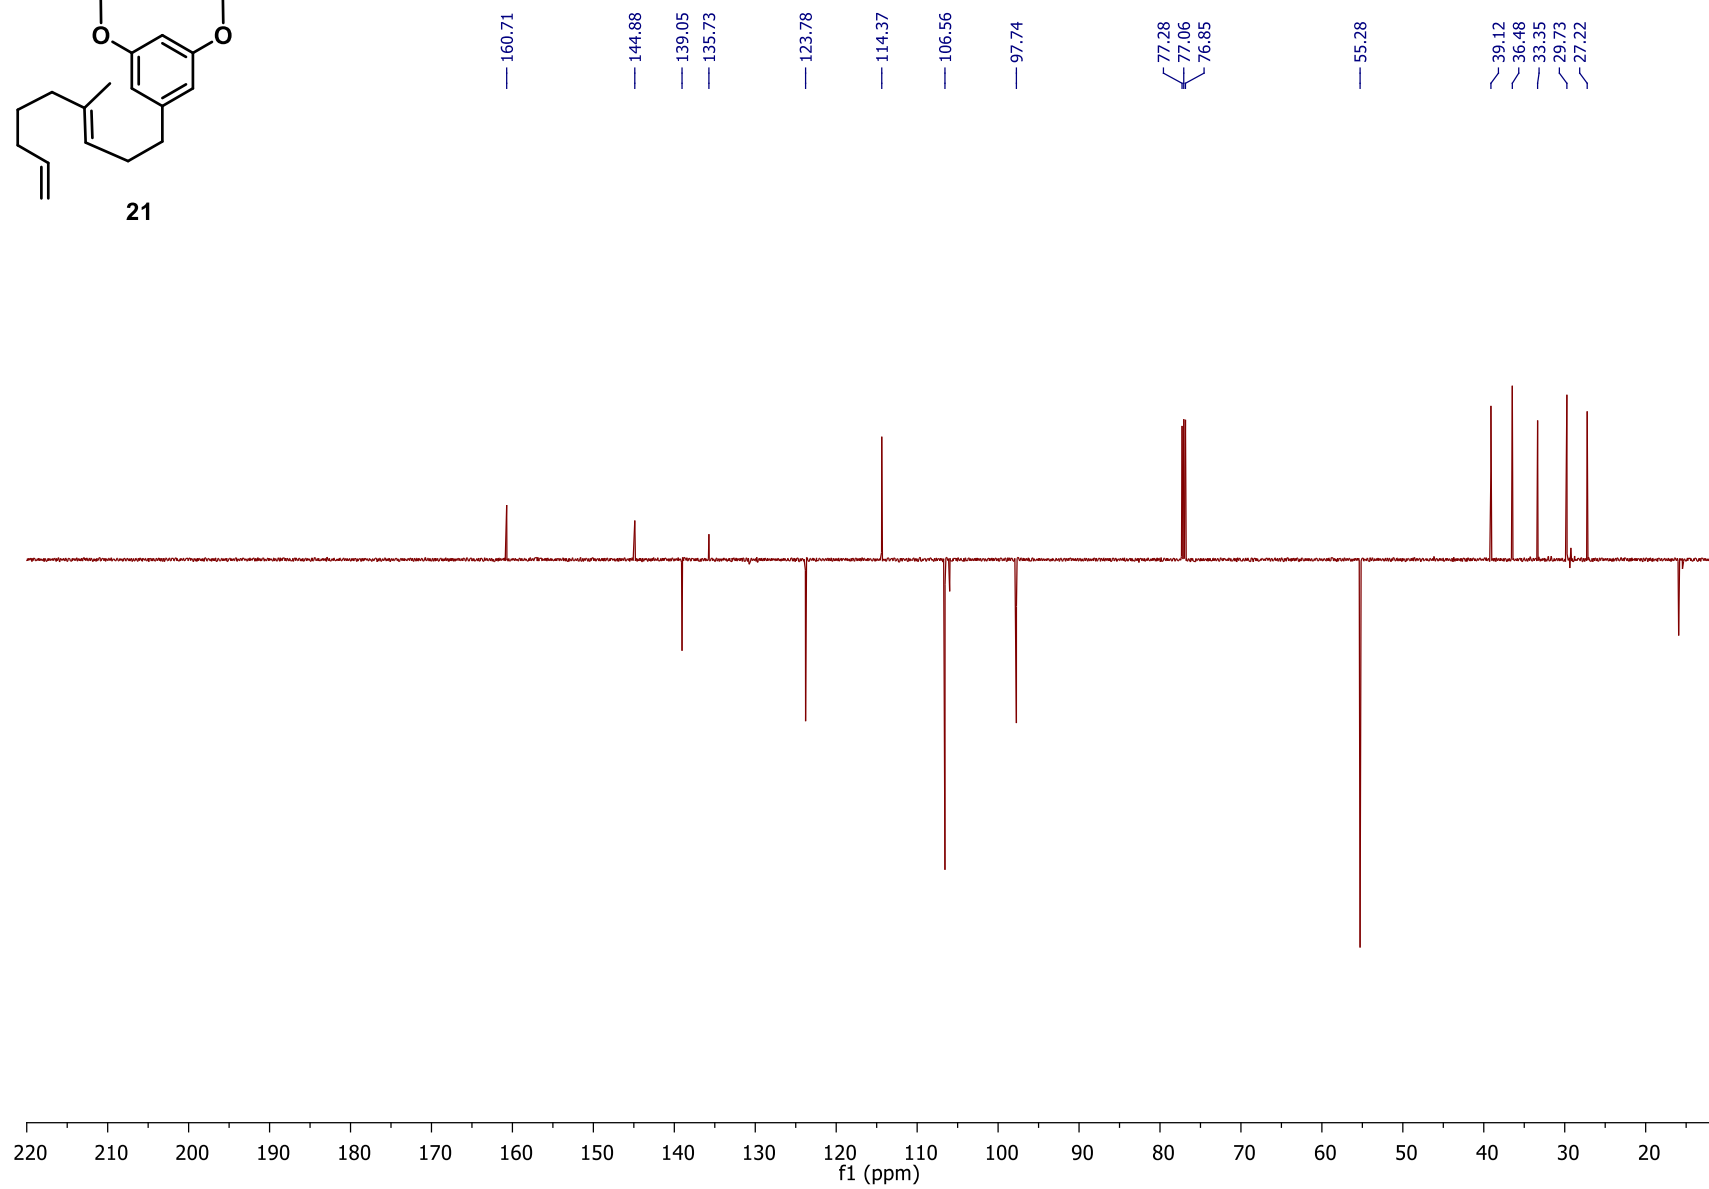

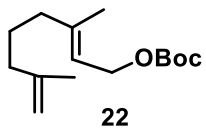

(contains ~11% of trisubstituted alkene isomer)

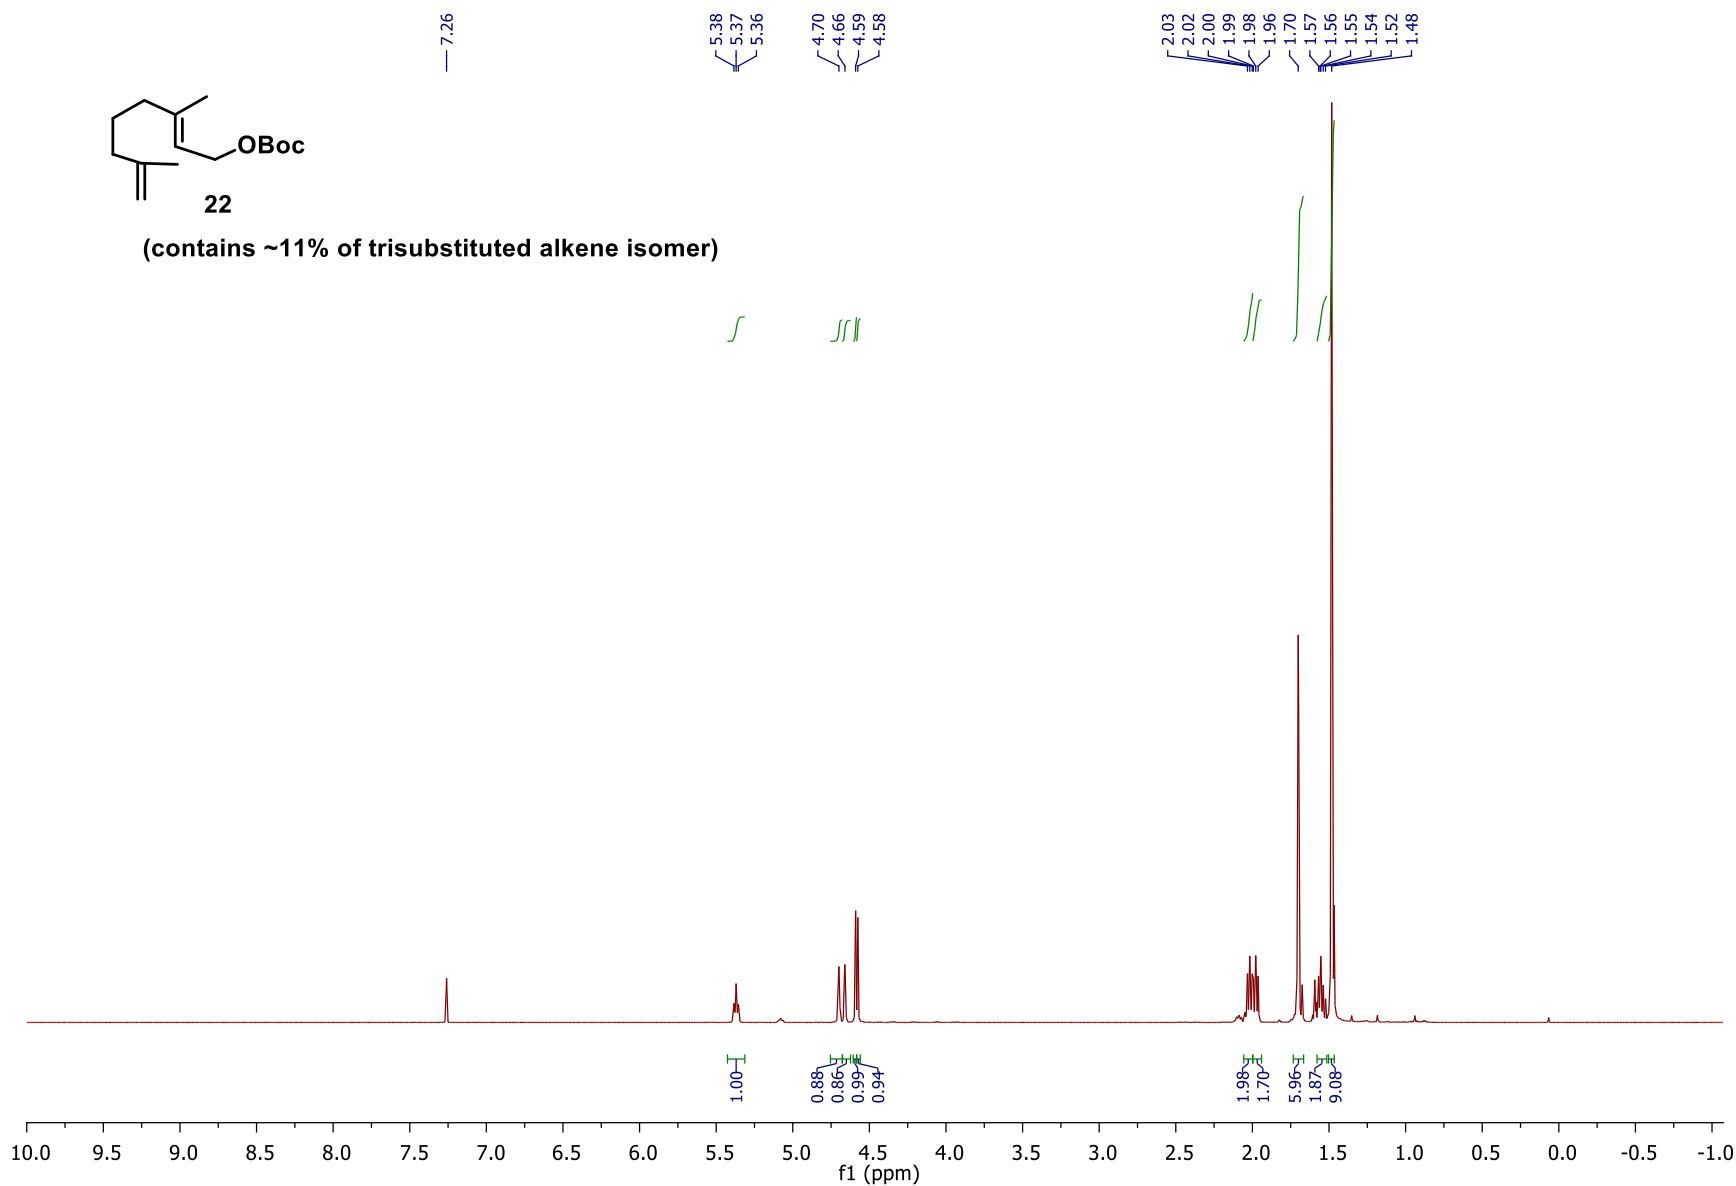

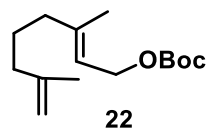

(contains ~11% of trisubstituted alkene isomer)

- 153.79
- 145.82
- 142.69
- 118.33
- 110.10
- 81.97
- 77.41
- 77.16
- 76.91
- 63.88
- 39.17
- 37.42
- 27.95
- 25.56
- 22.50
- 16.54

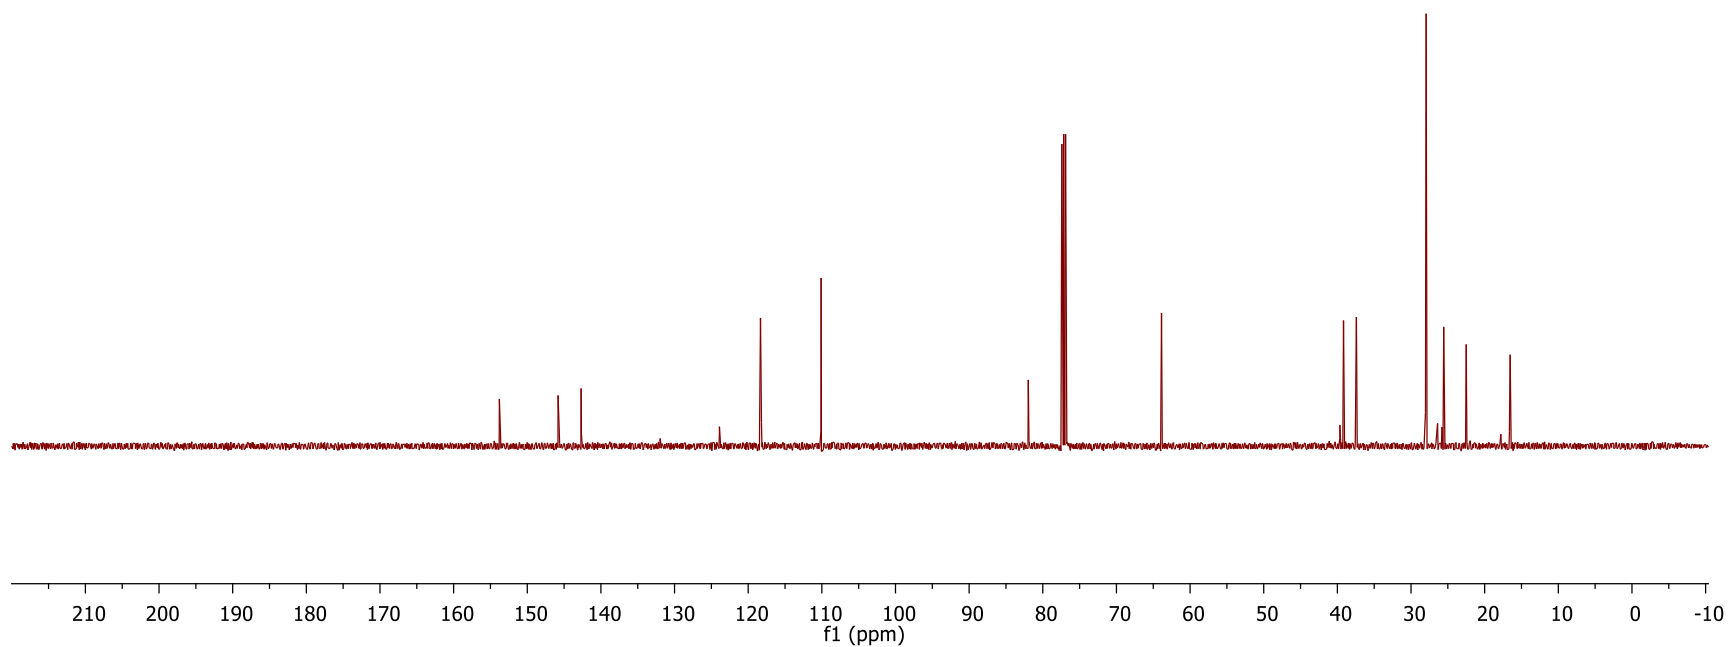

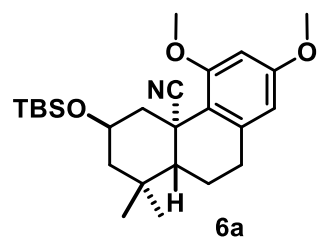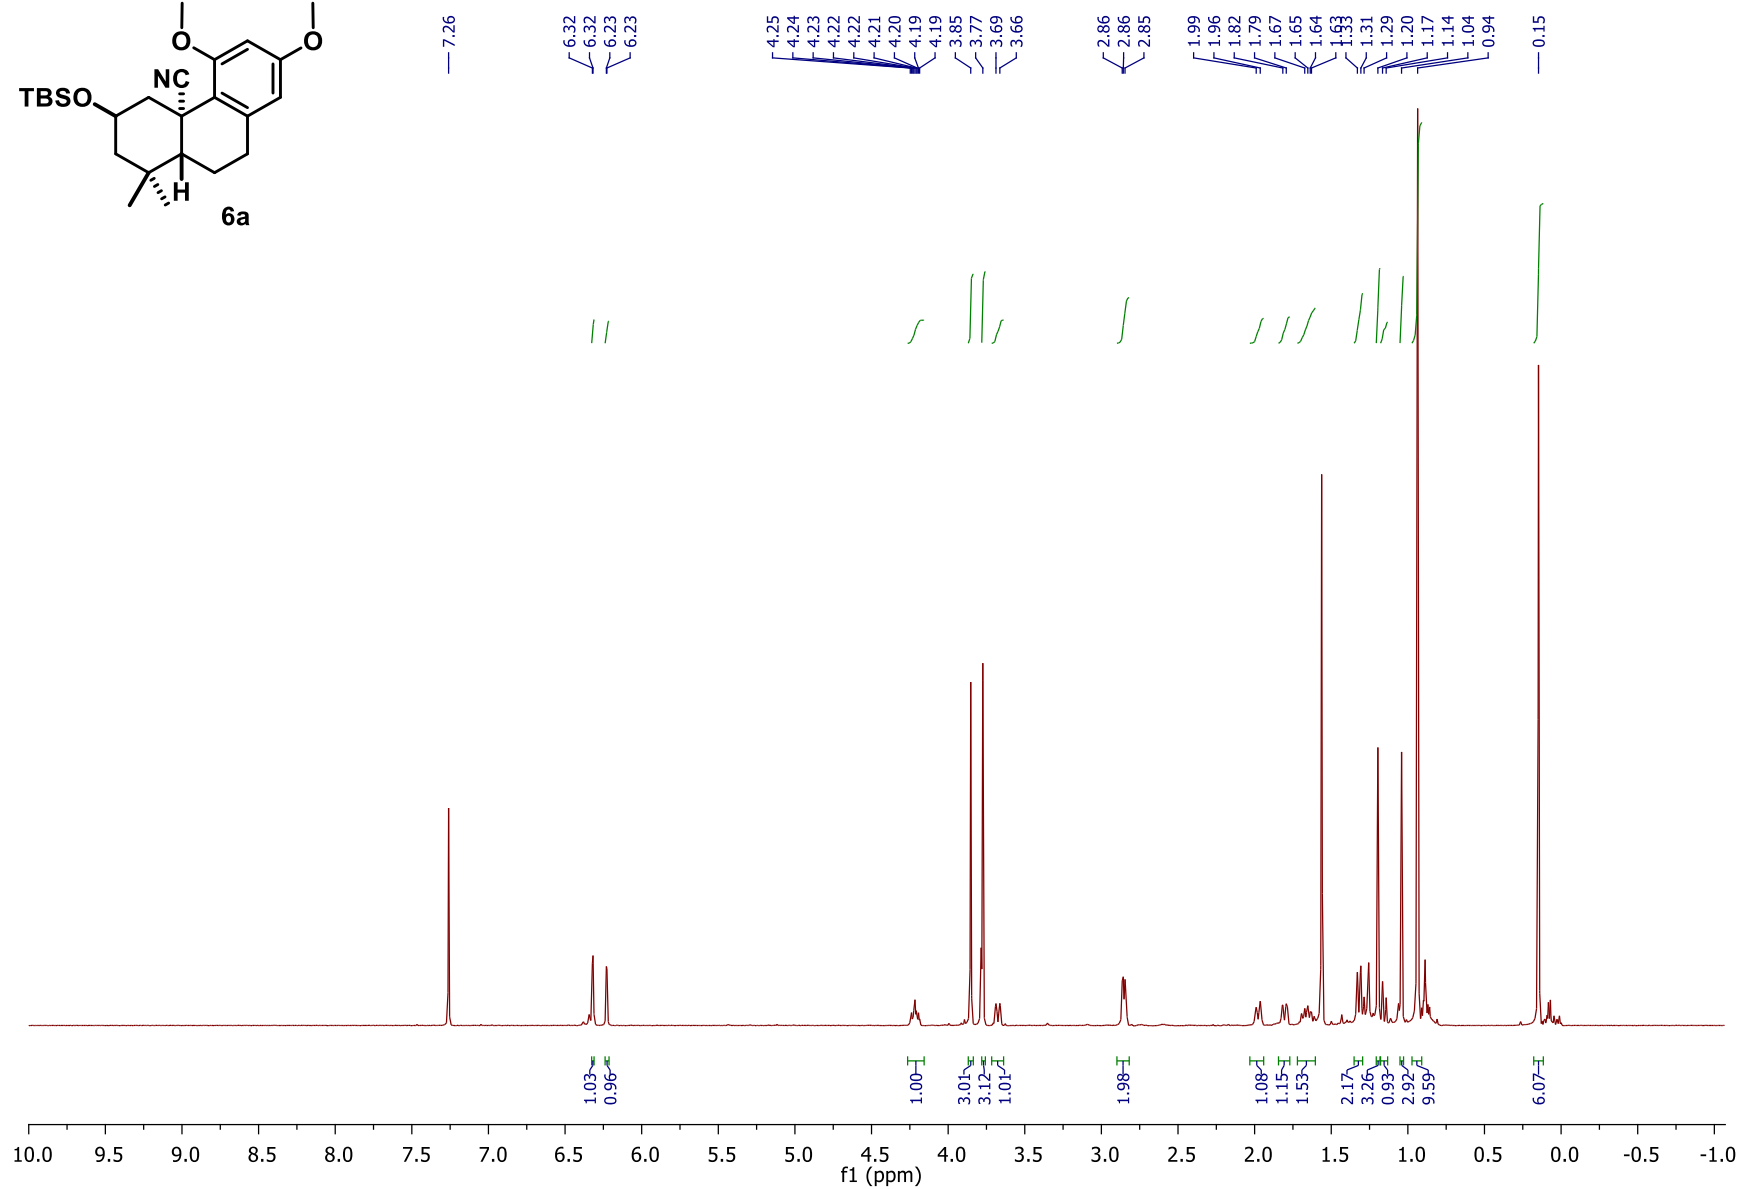



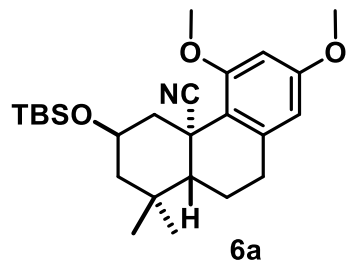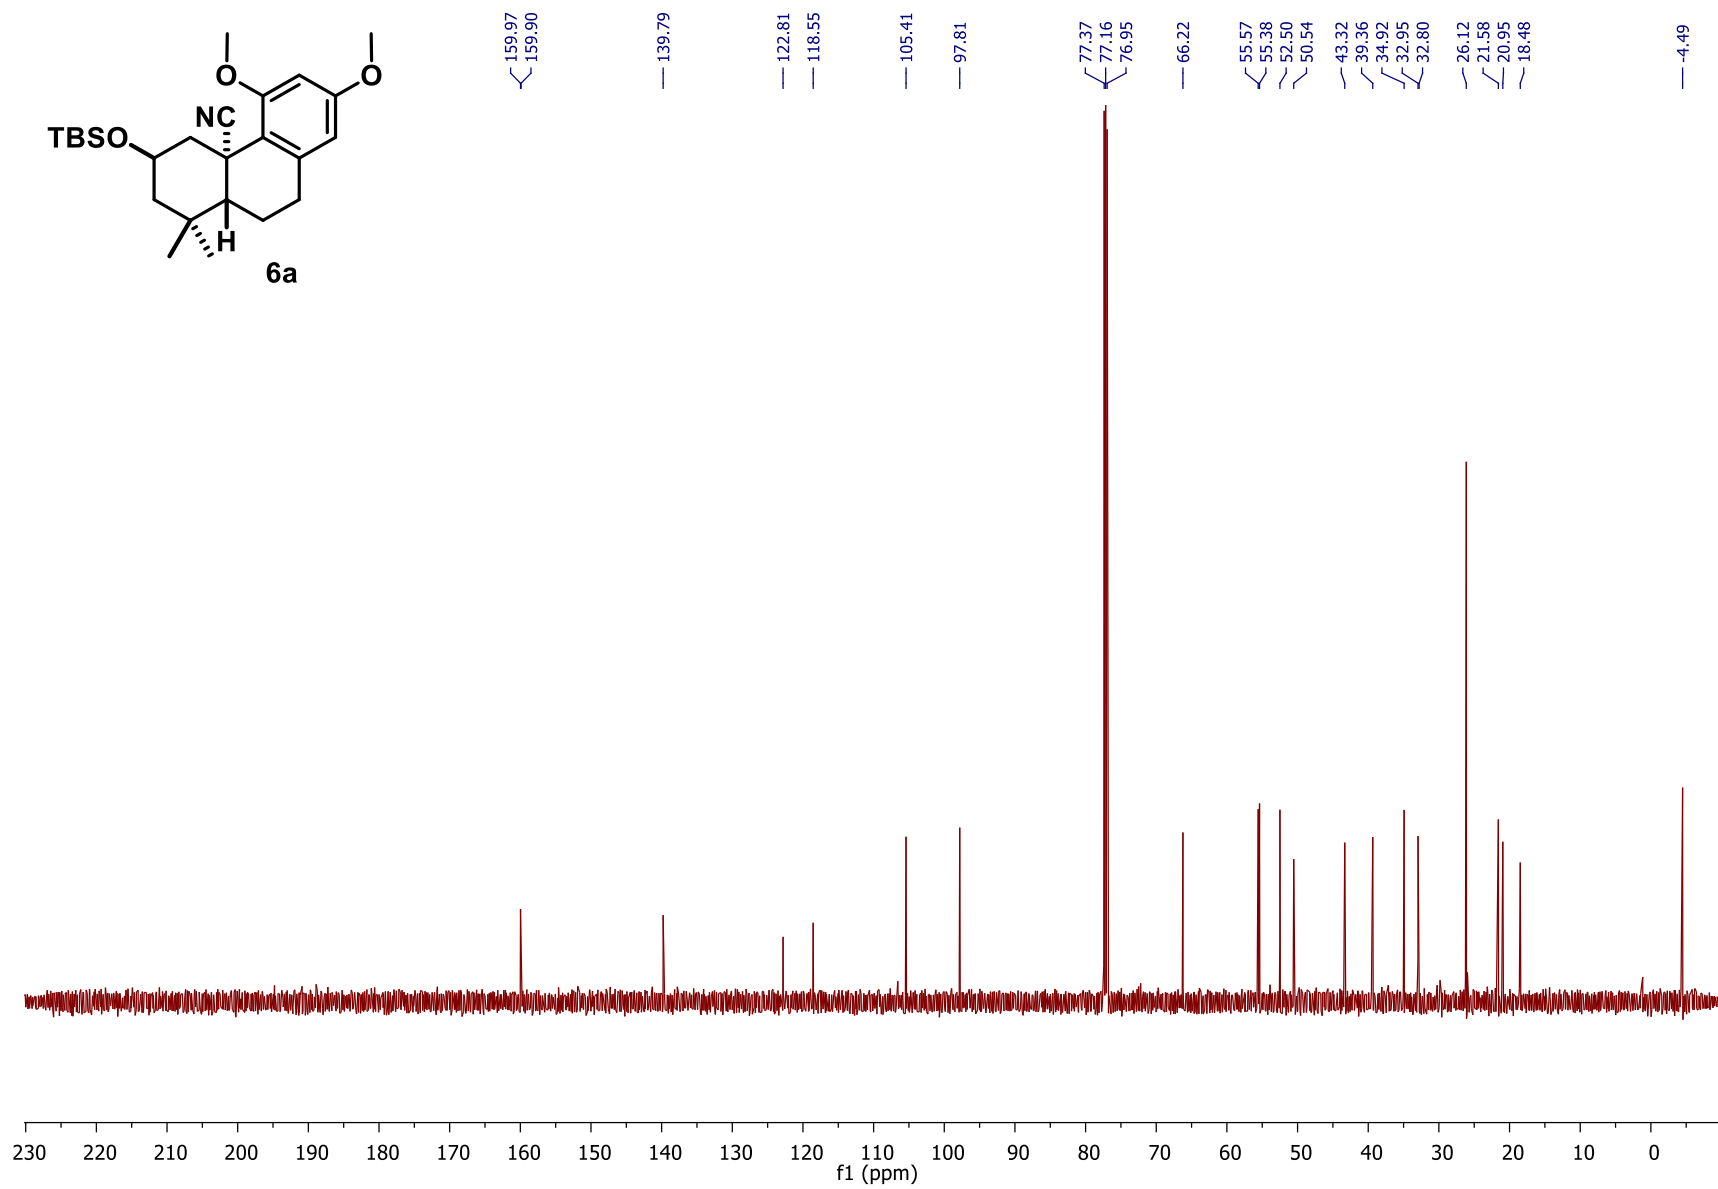

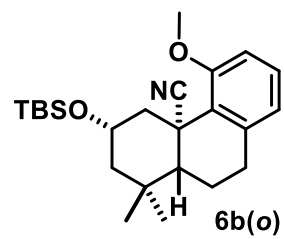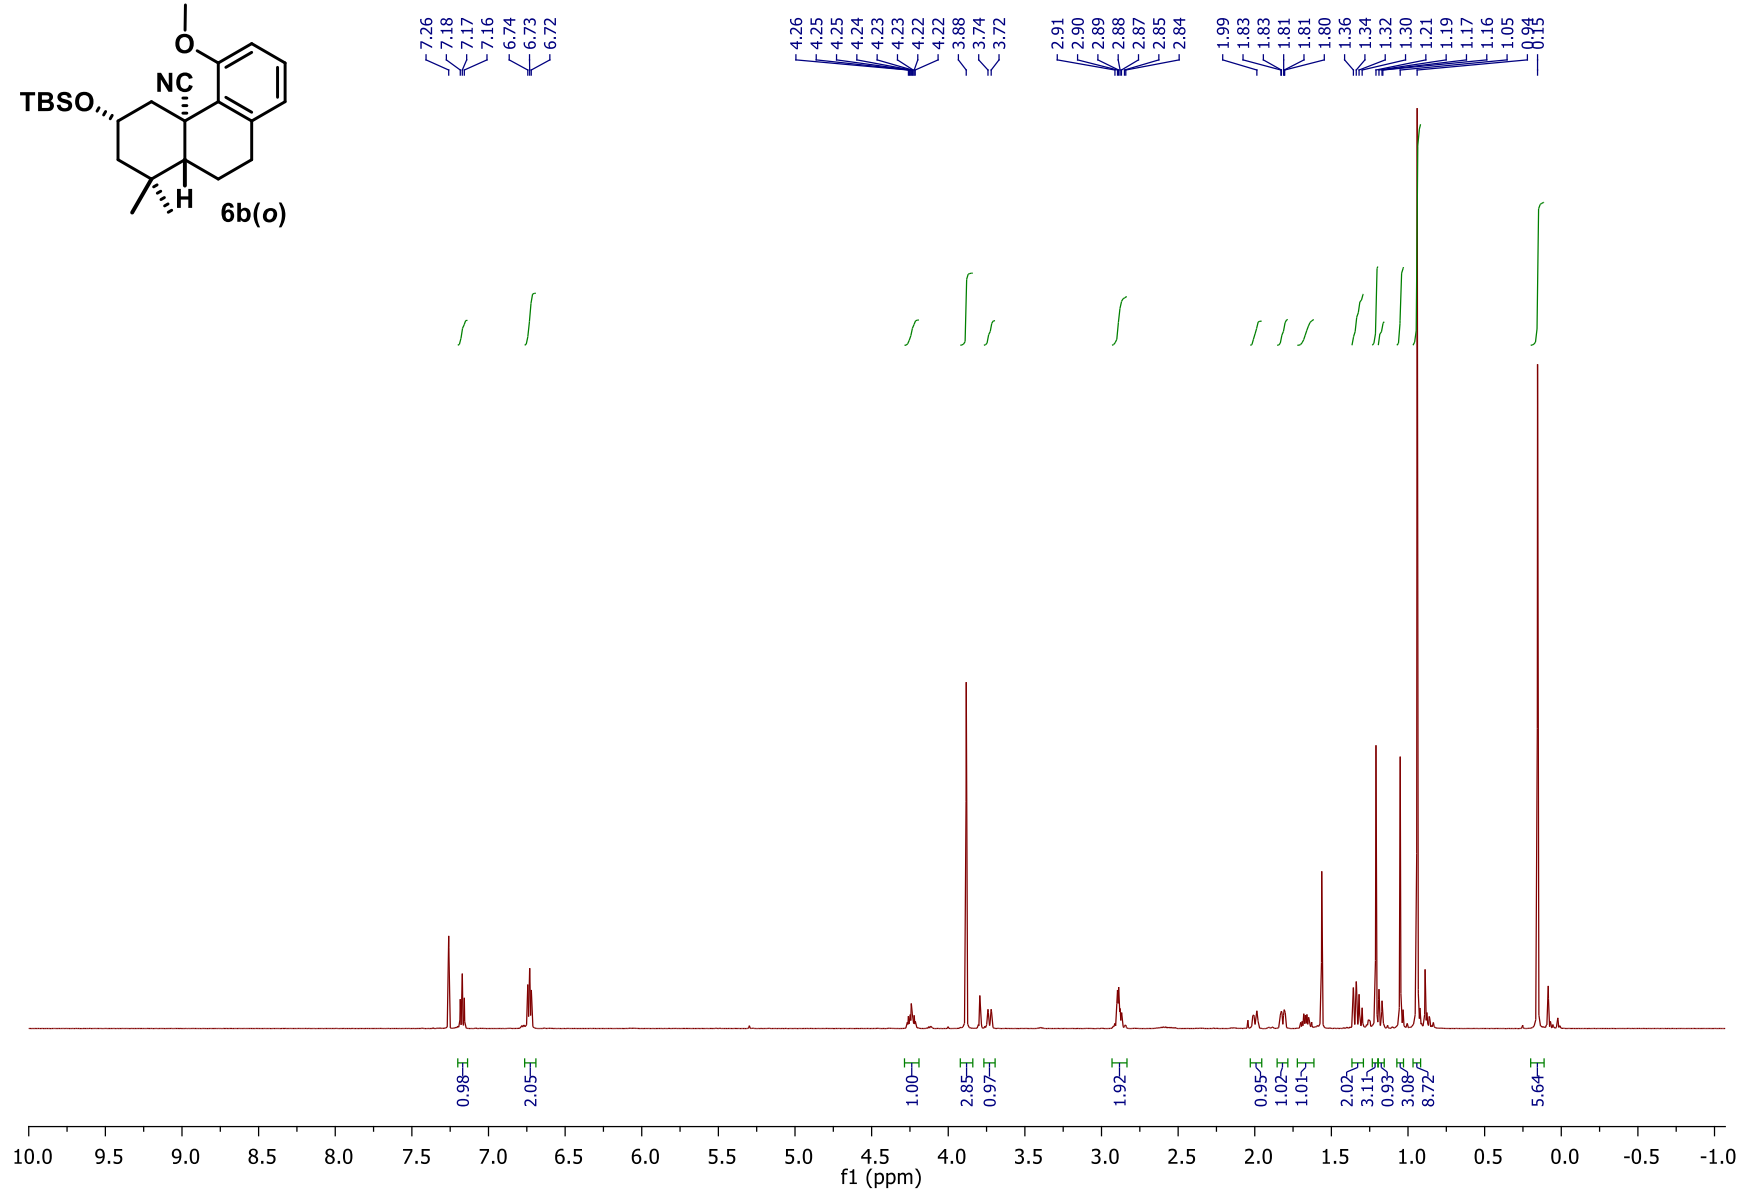

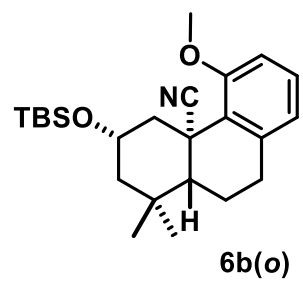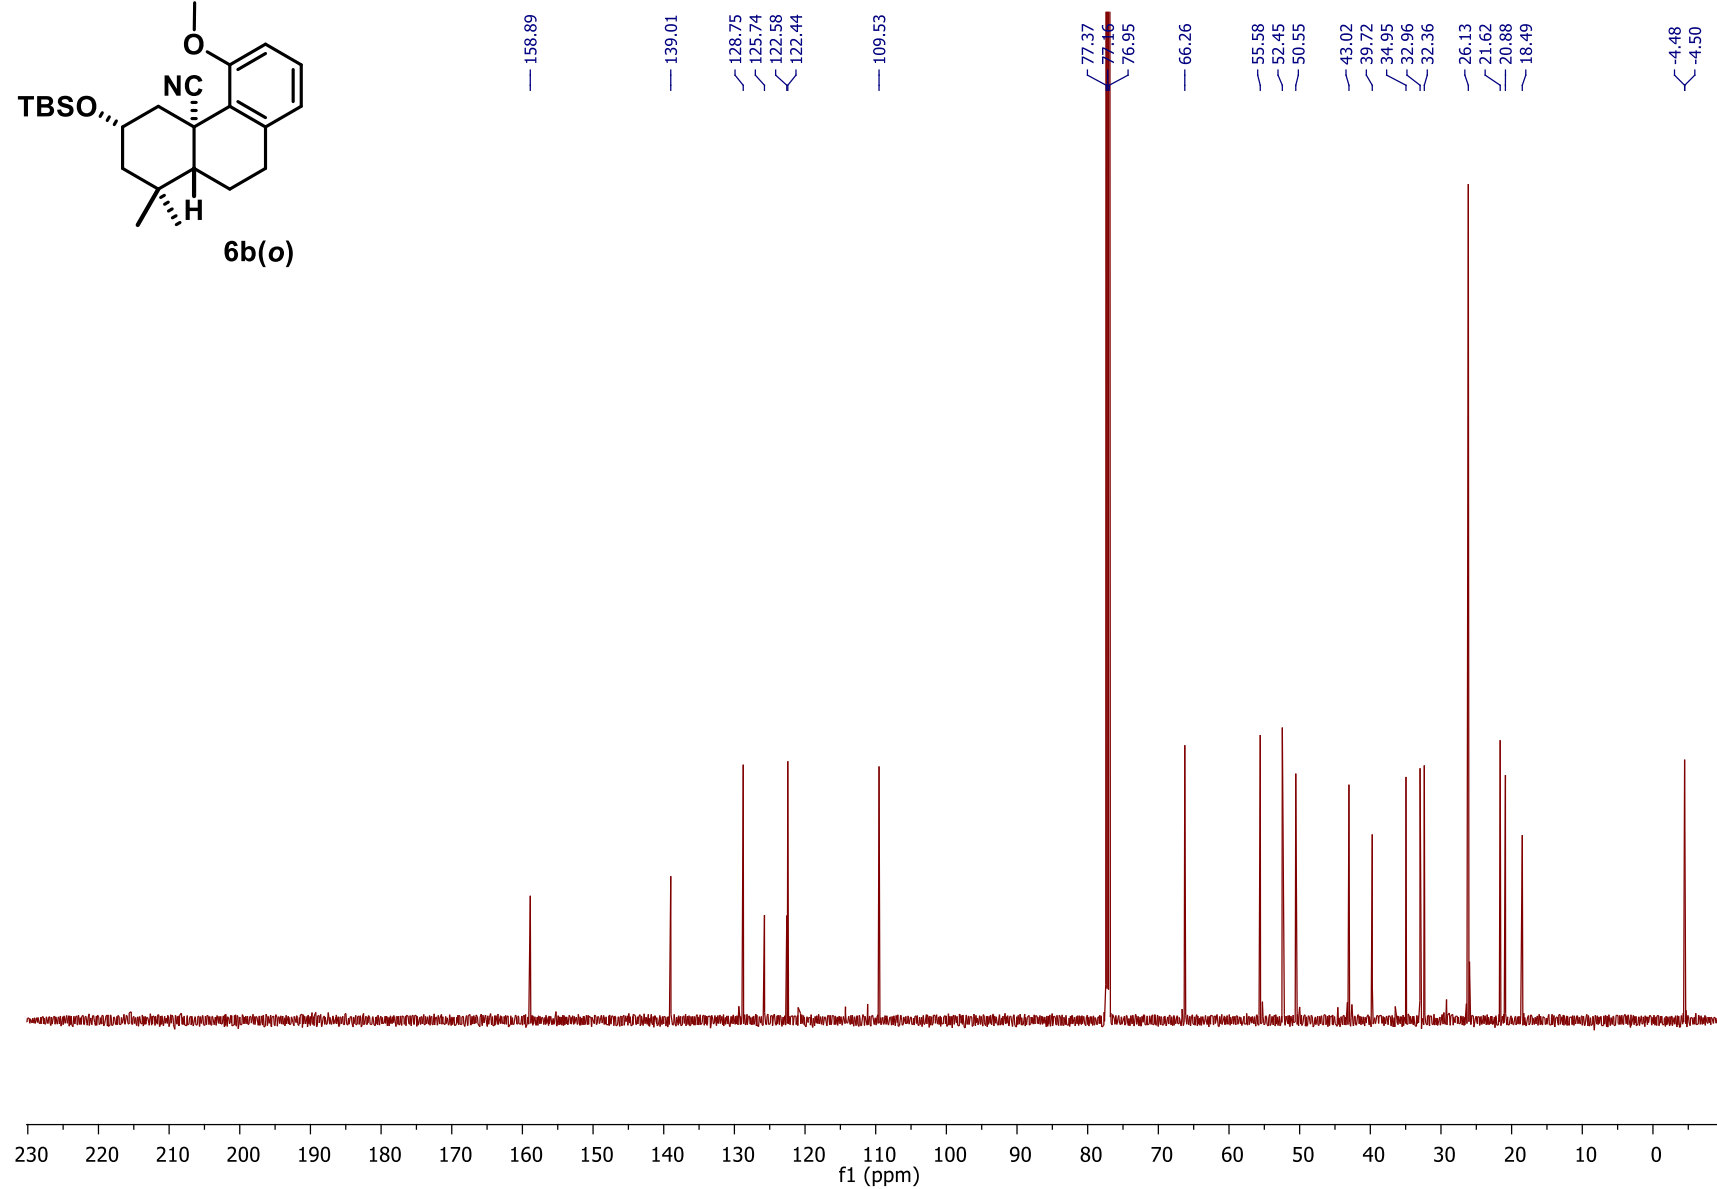

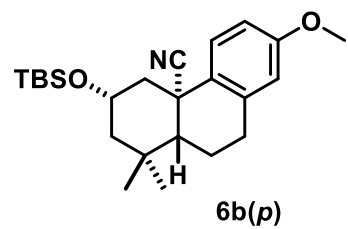

6b(p)  
(contains ~10% of *ortho* regioisomer)

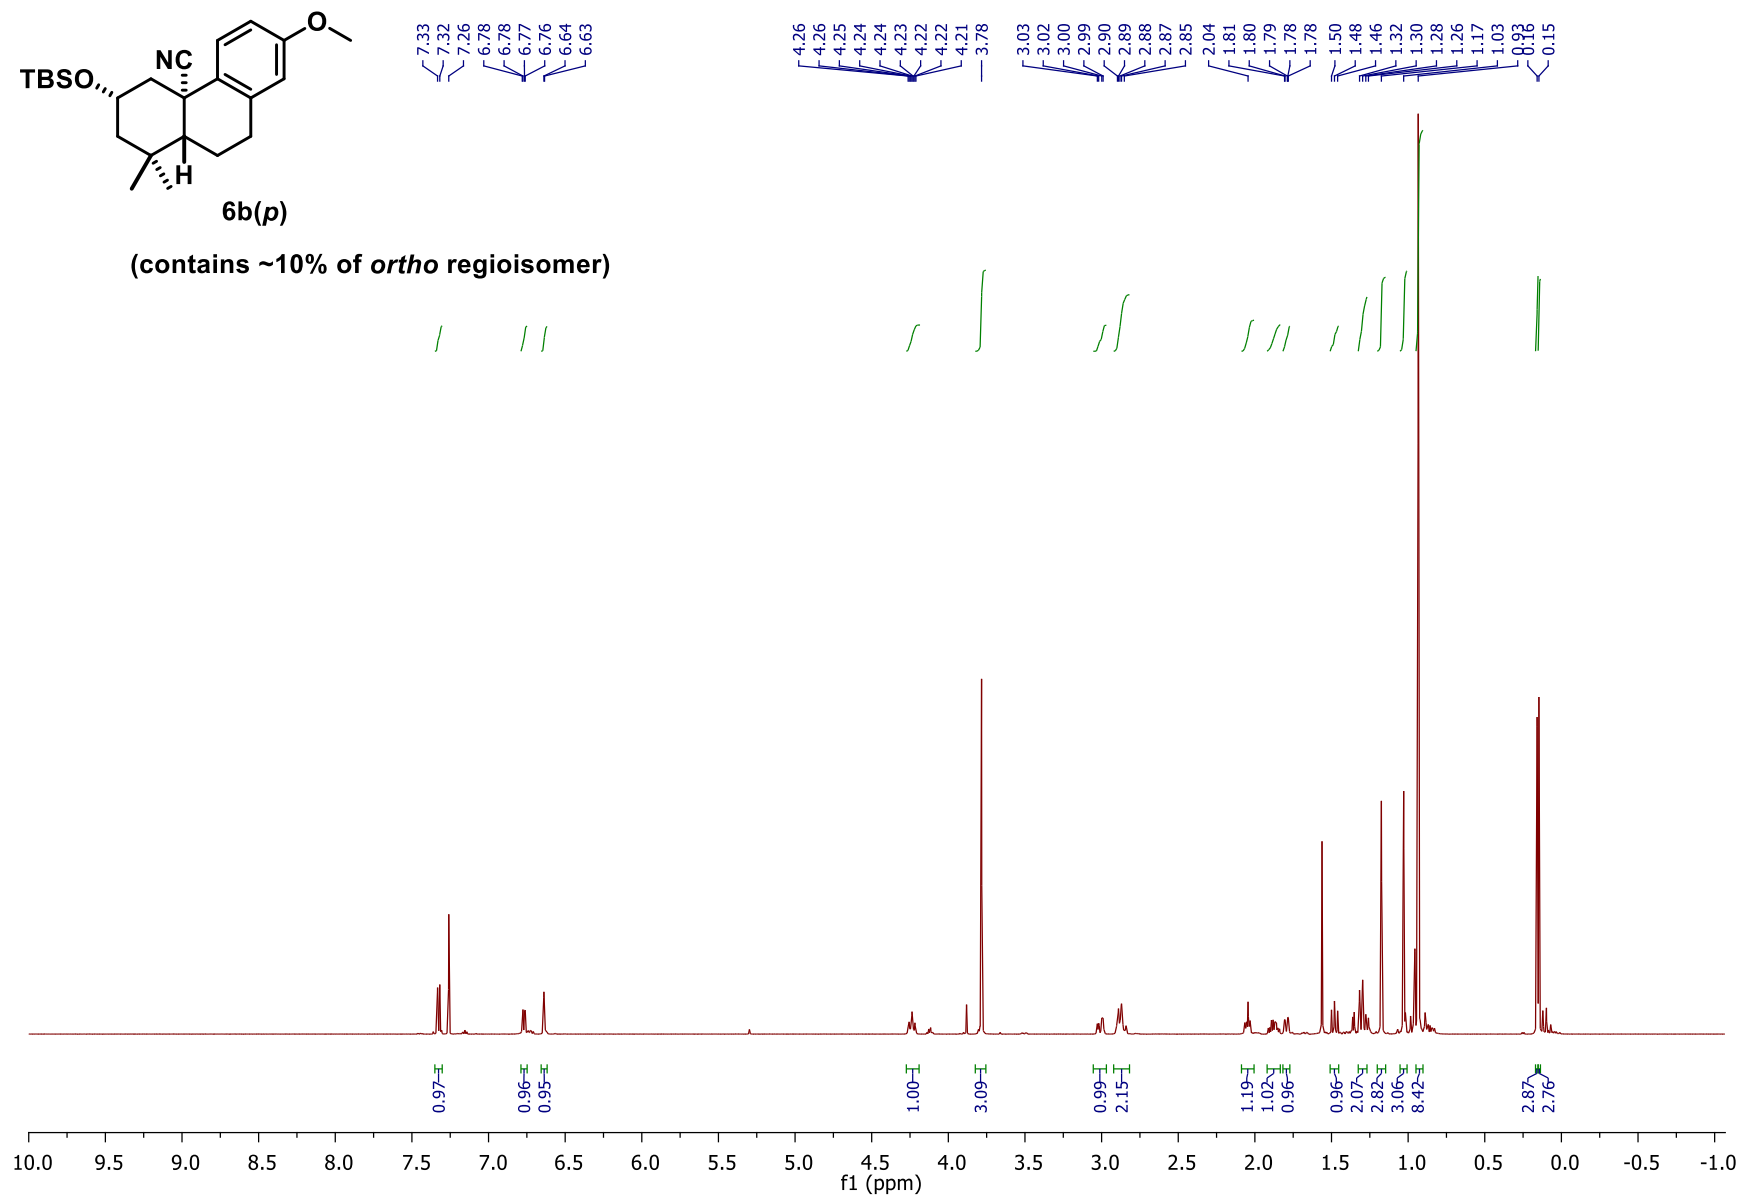



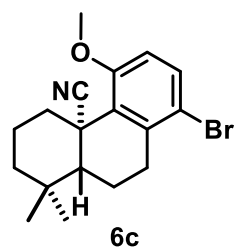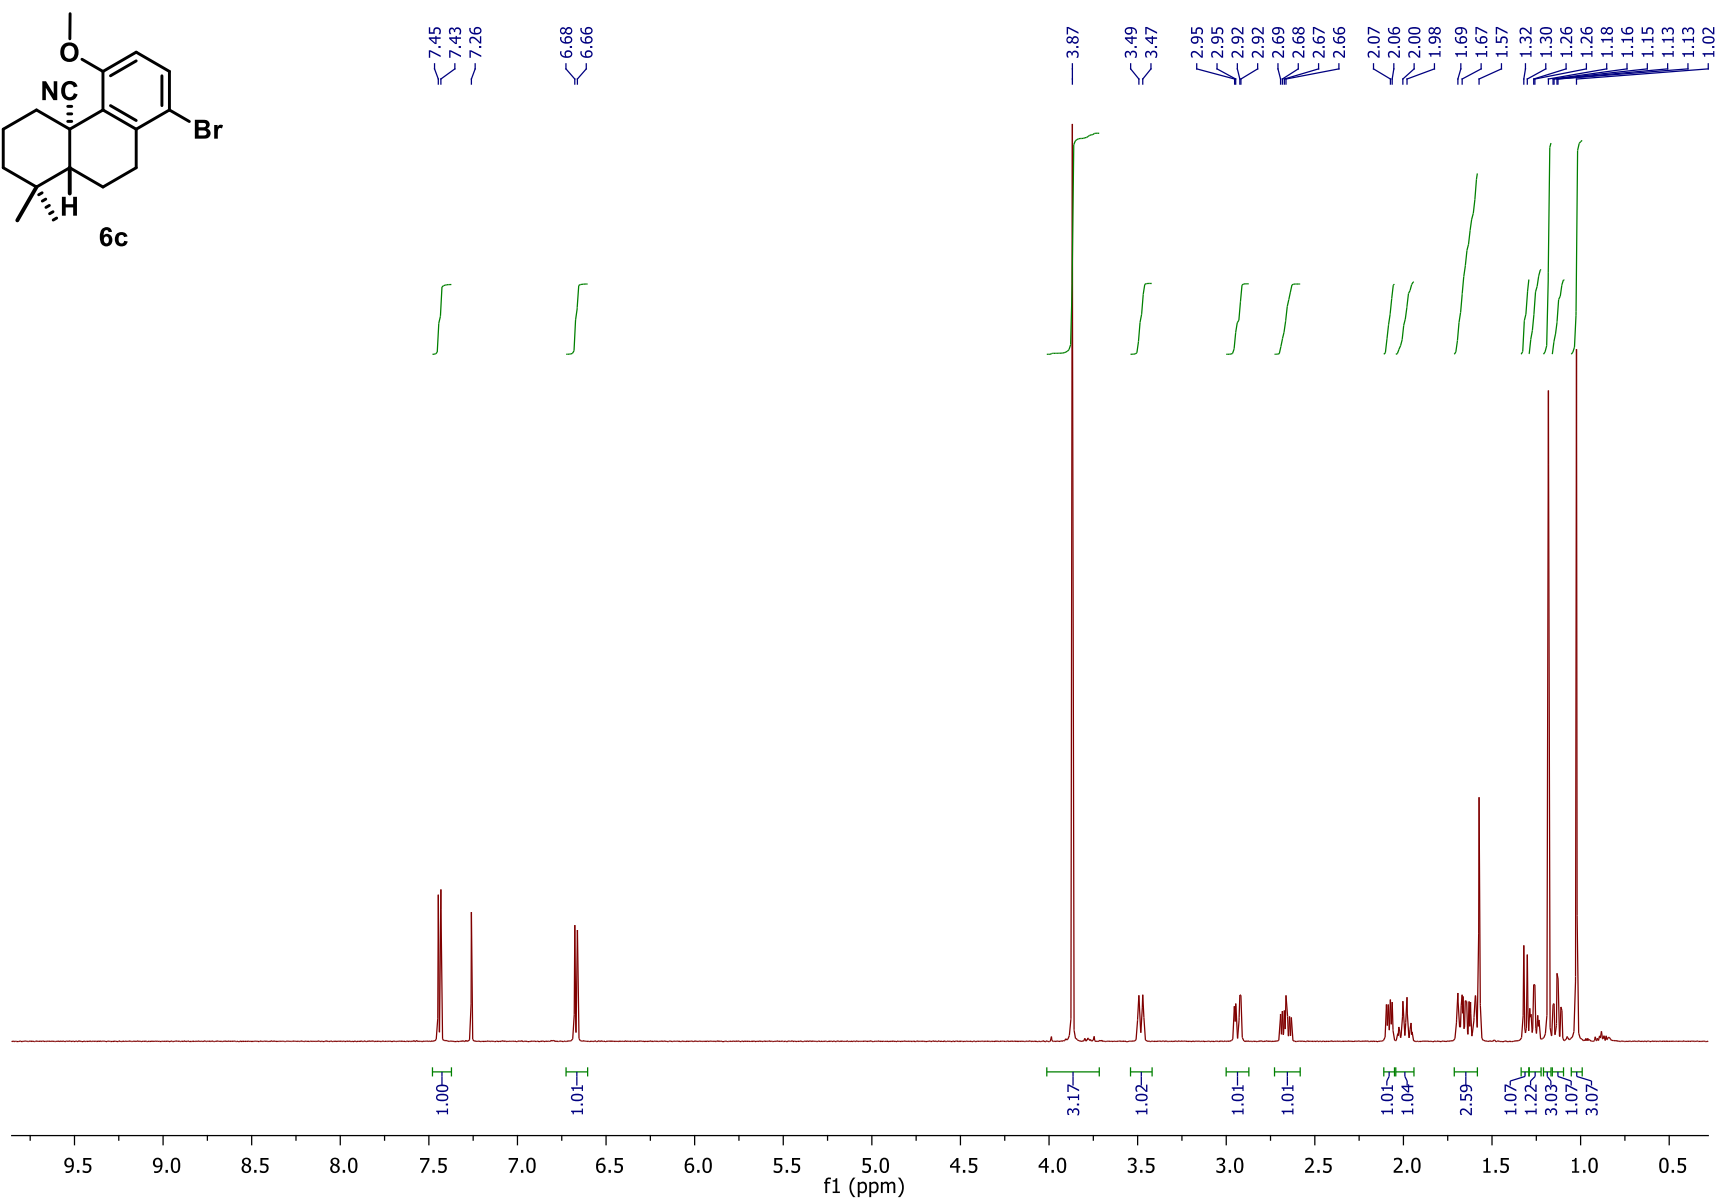

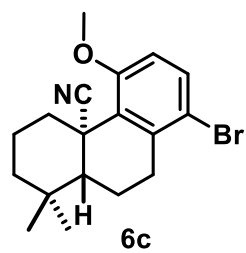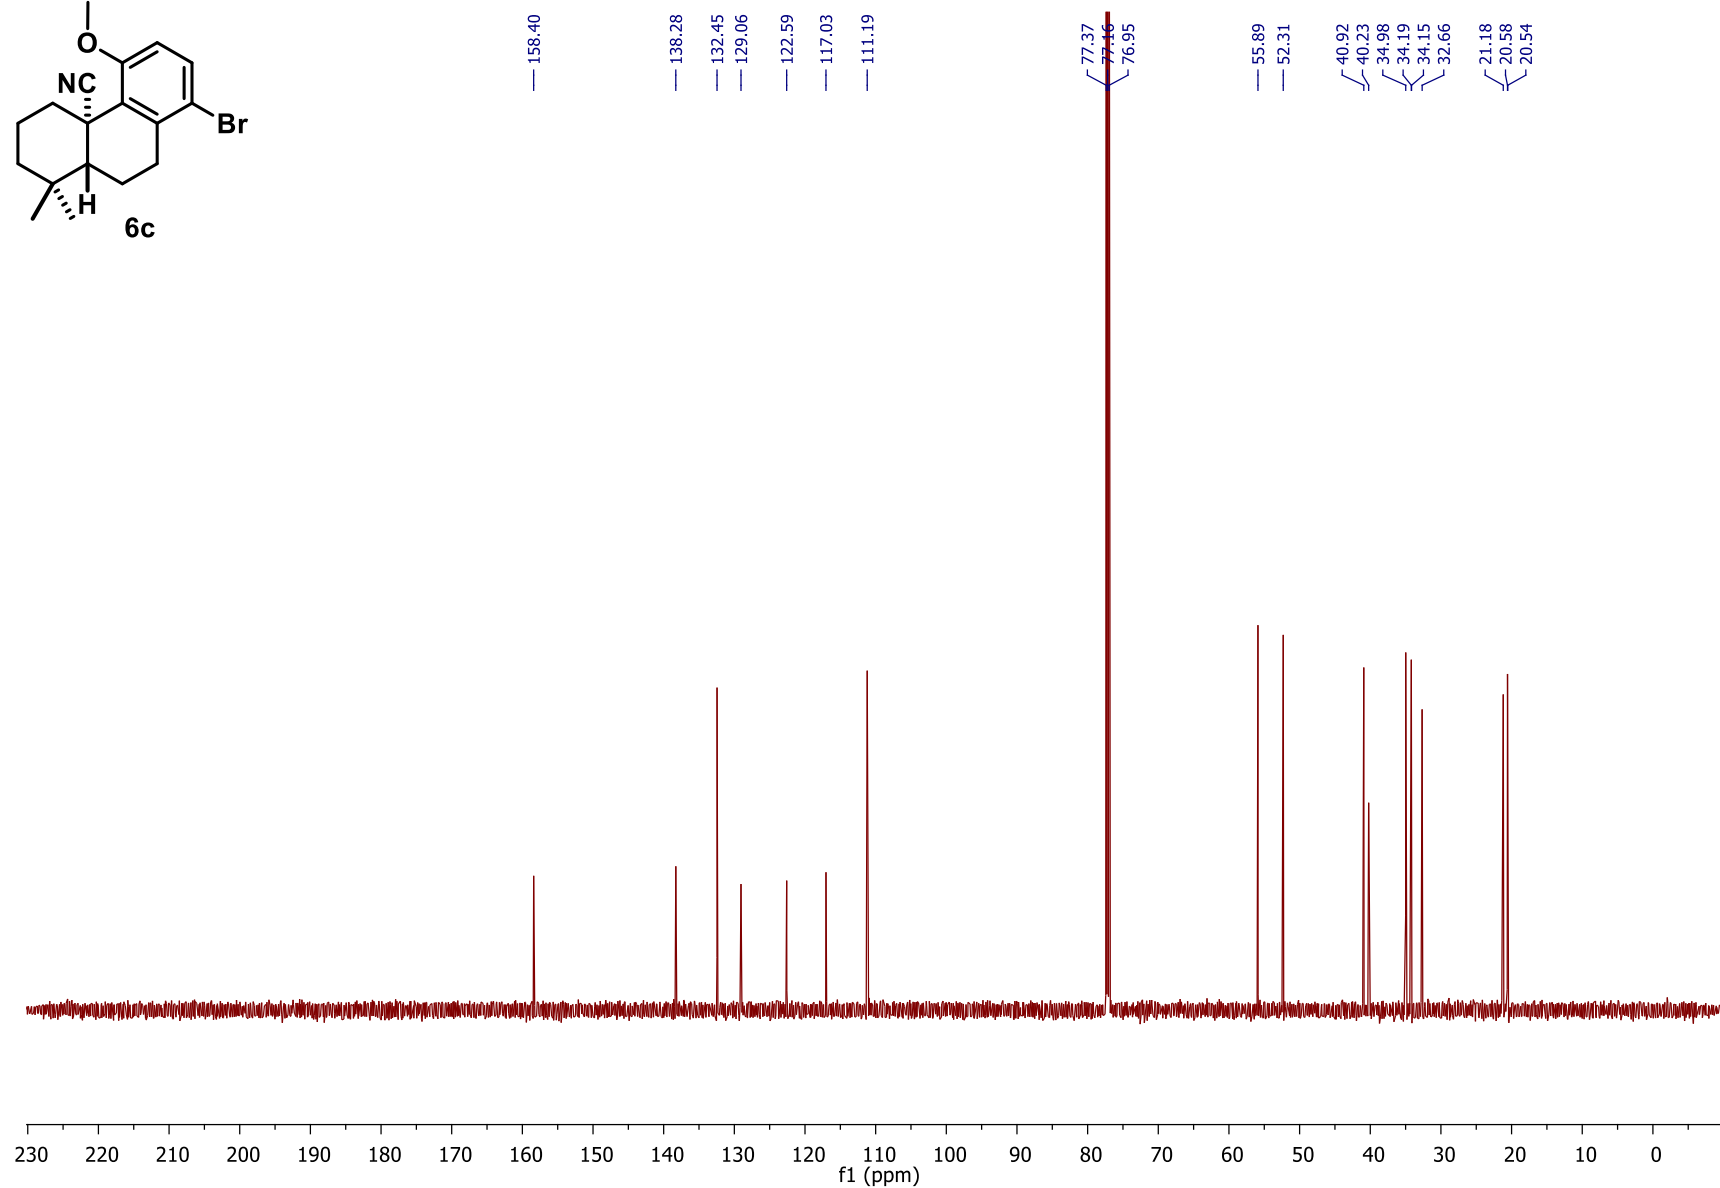

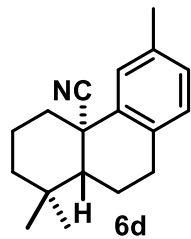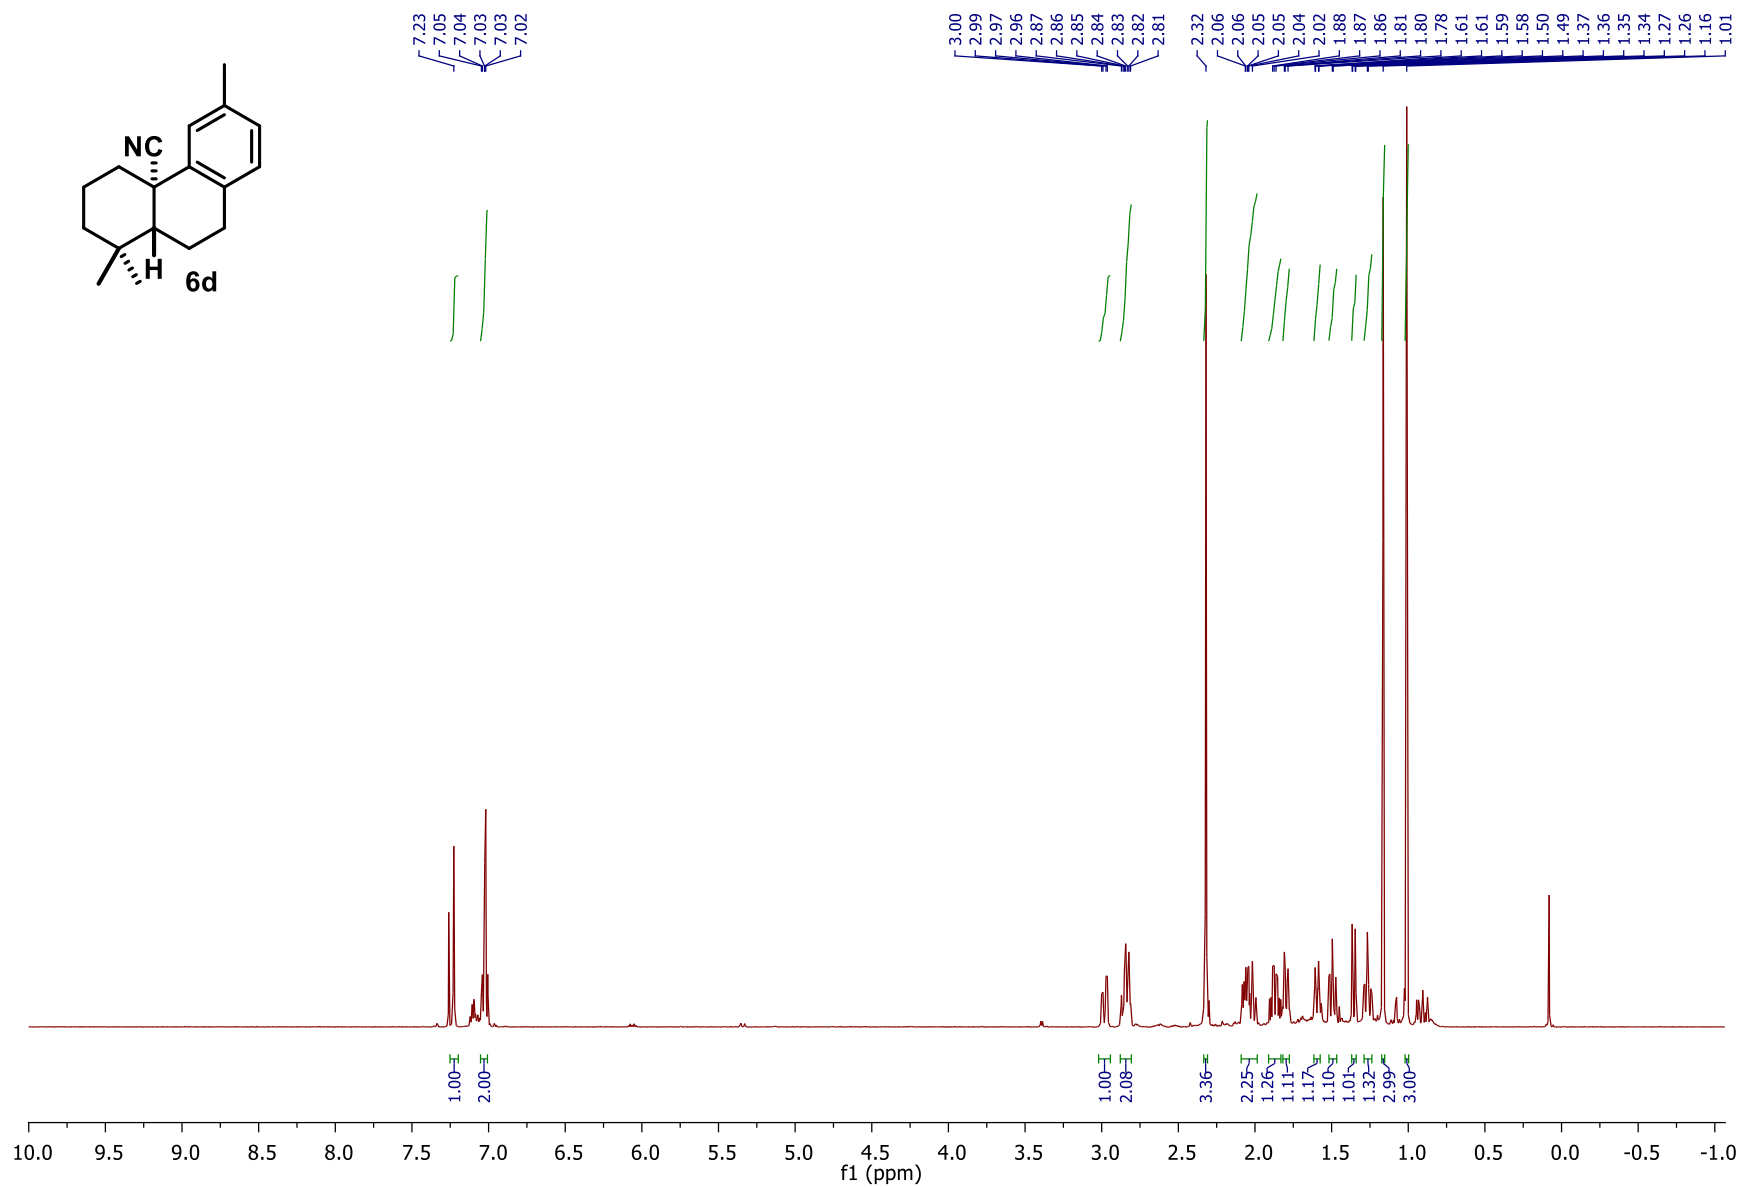



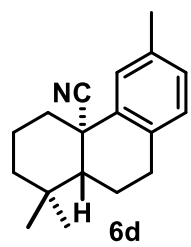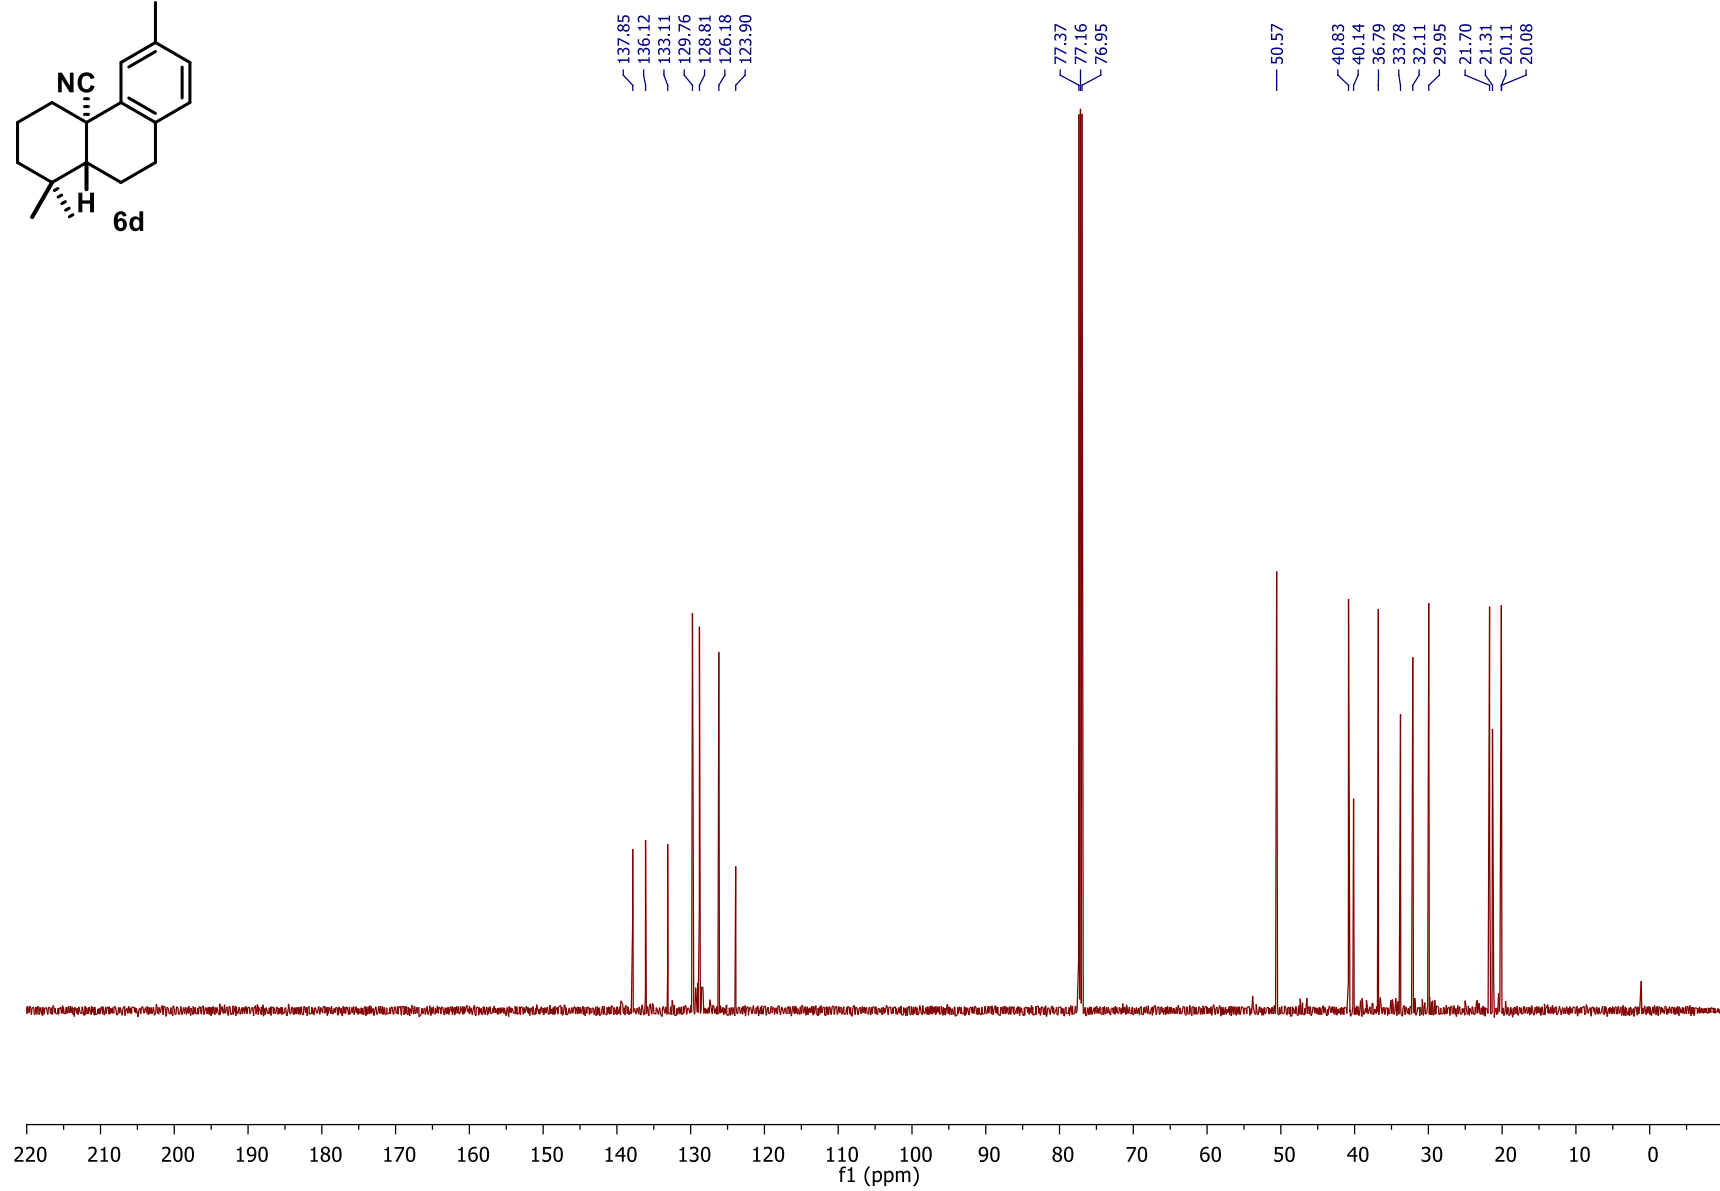

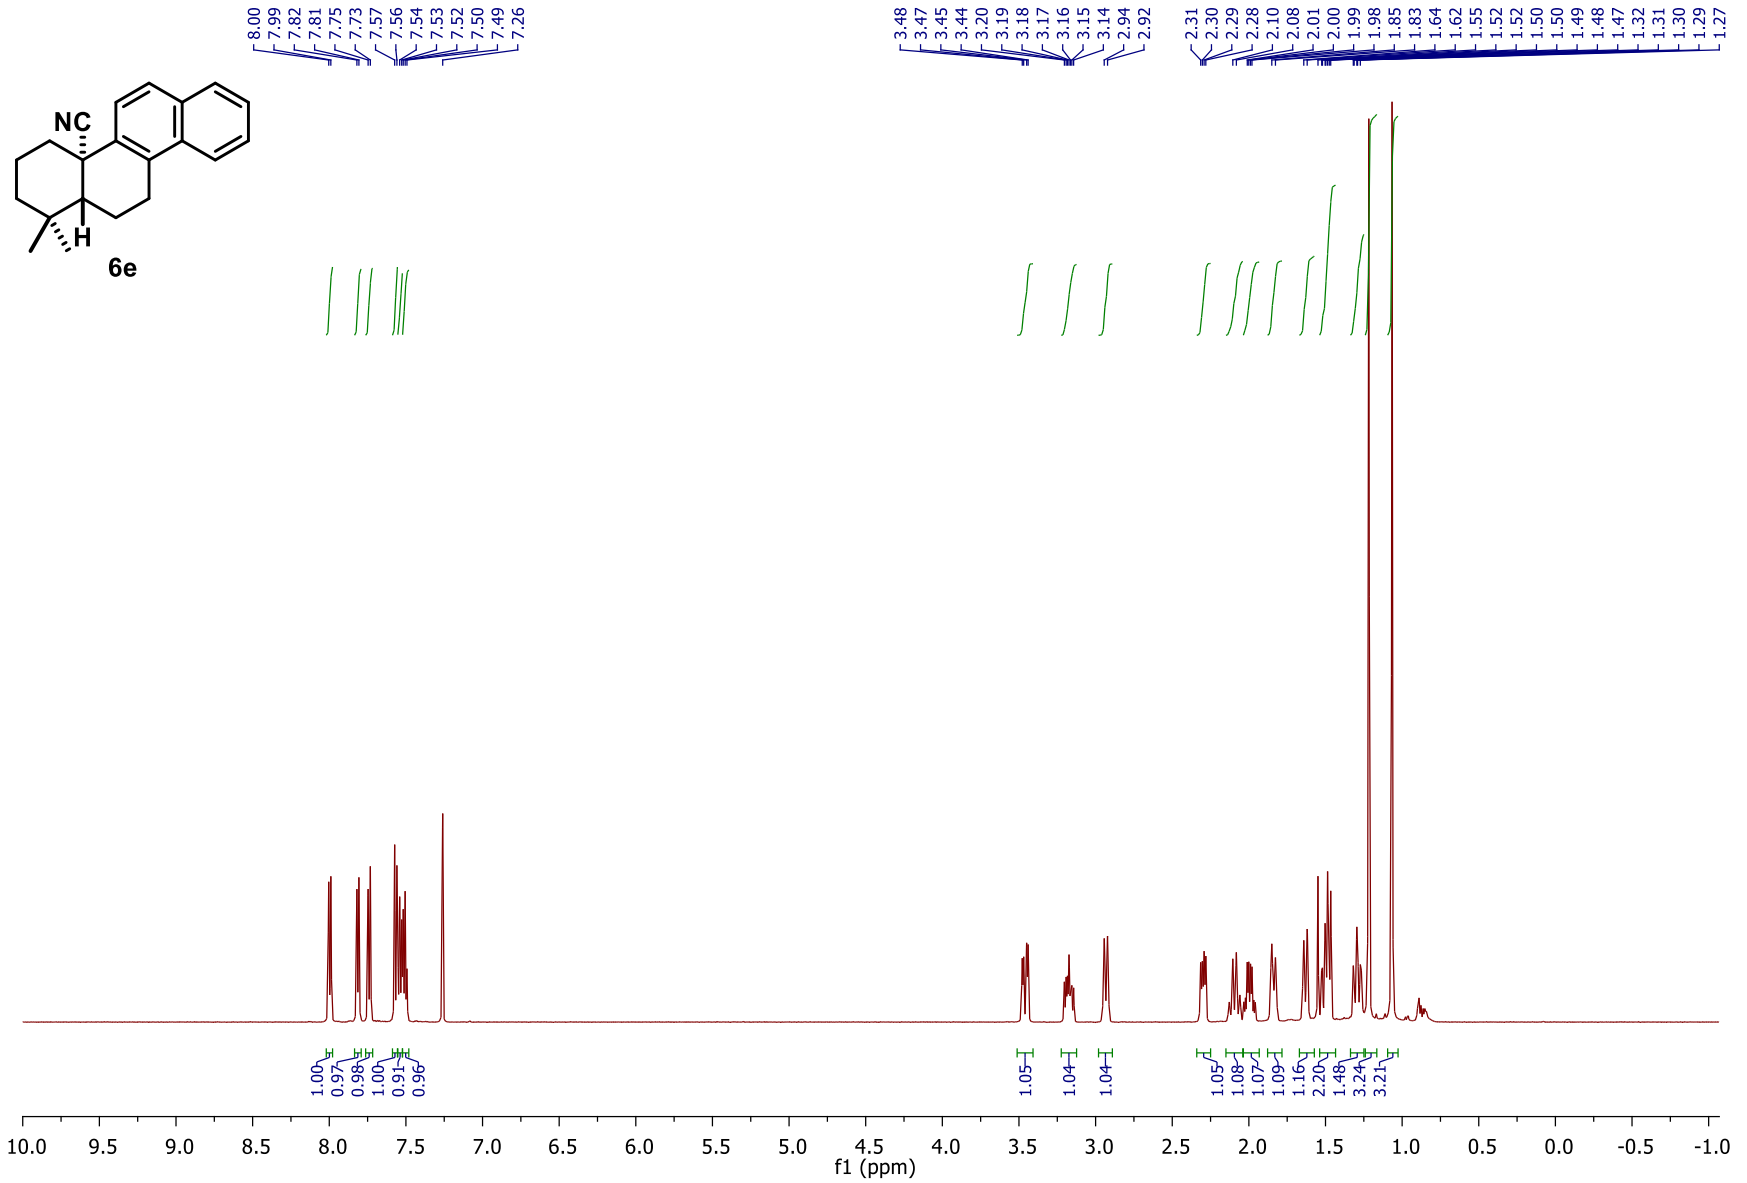

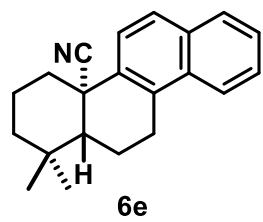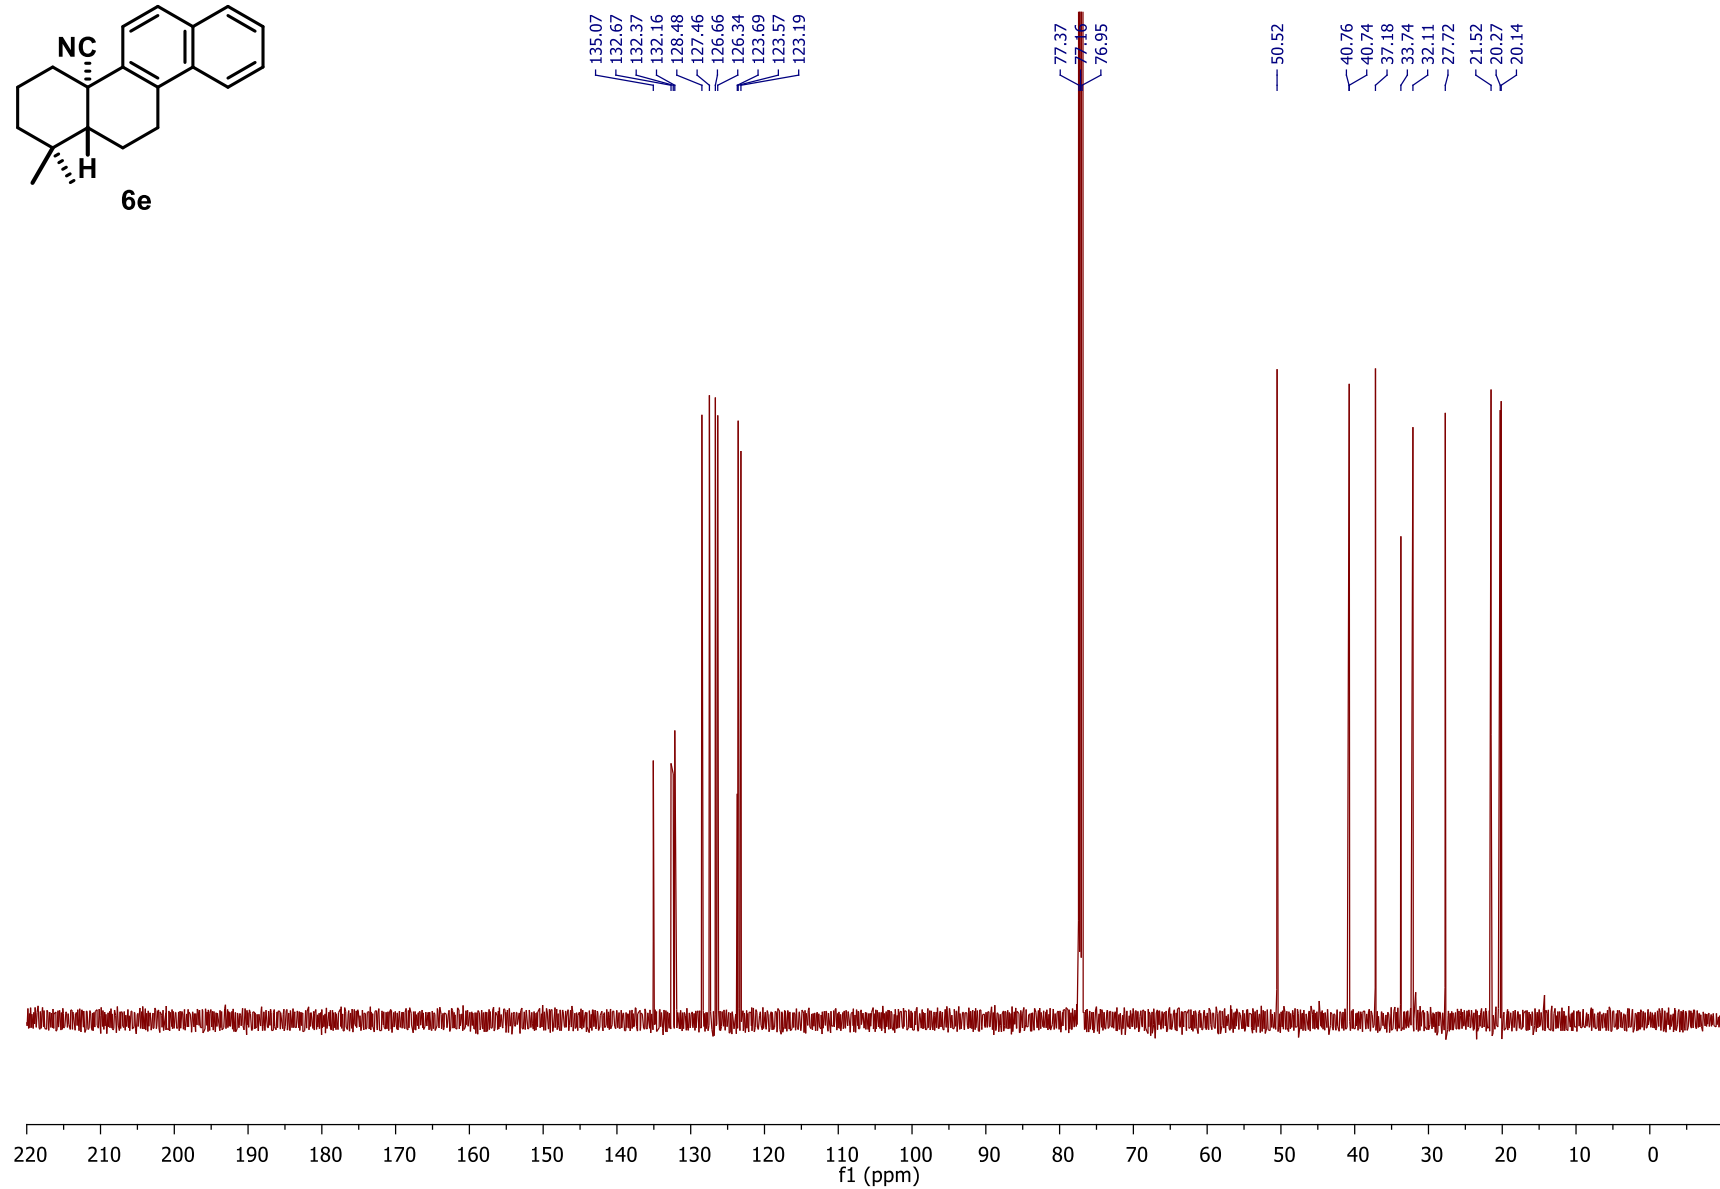

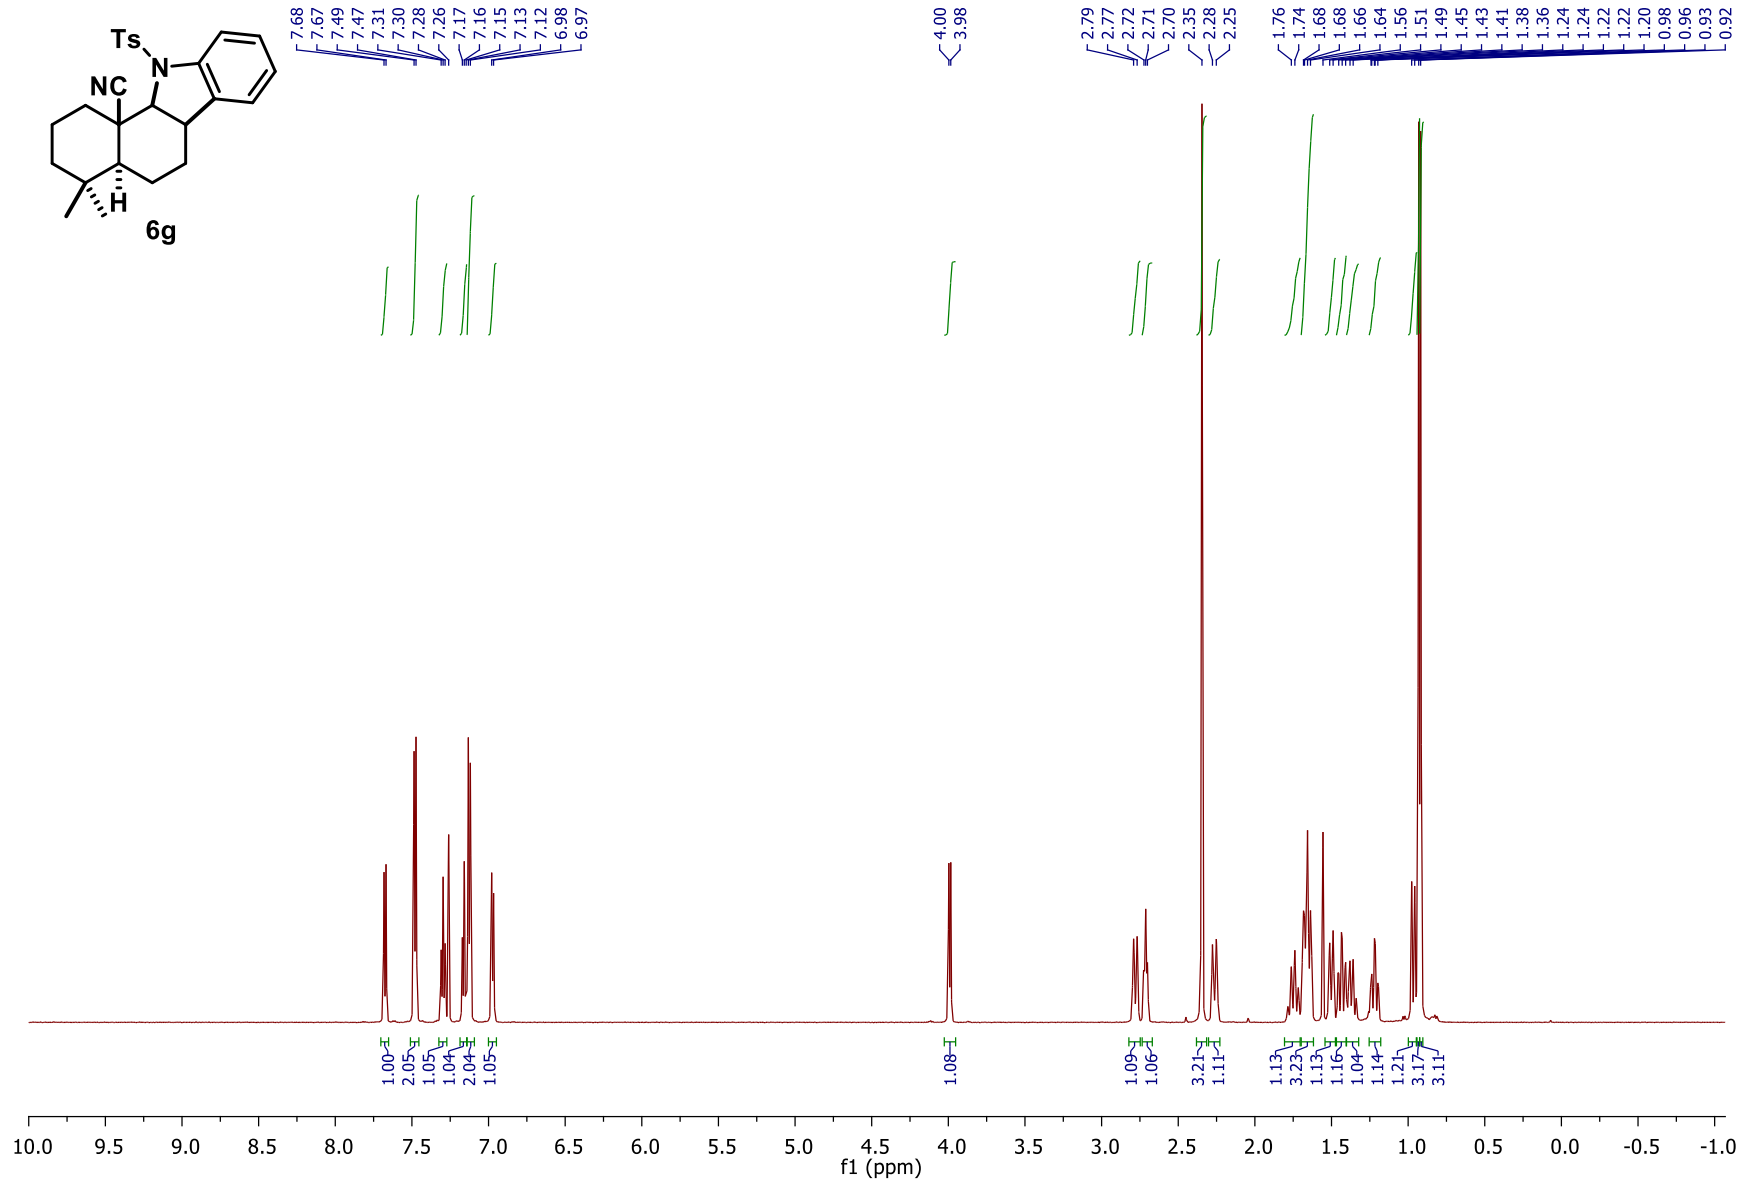

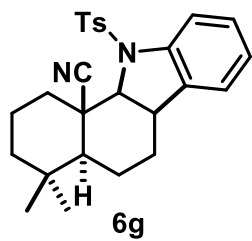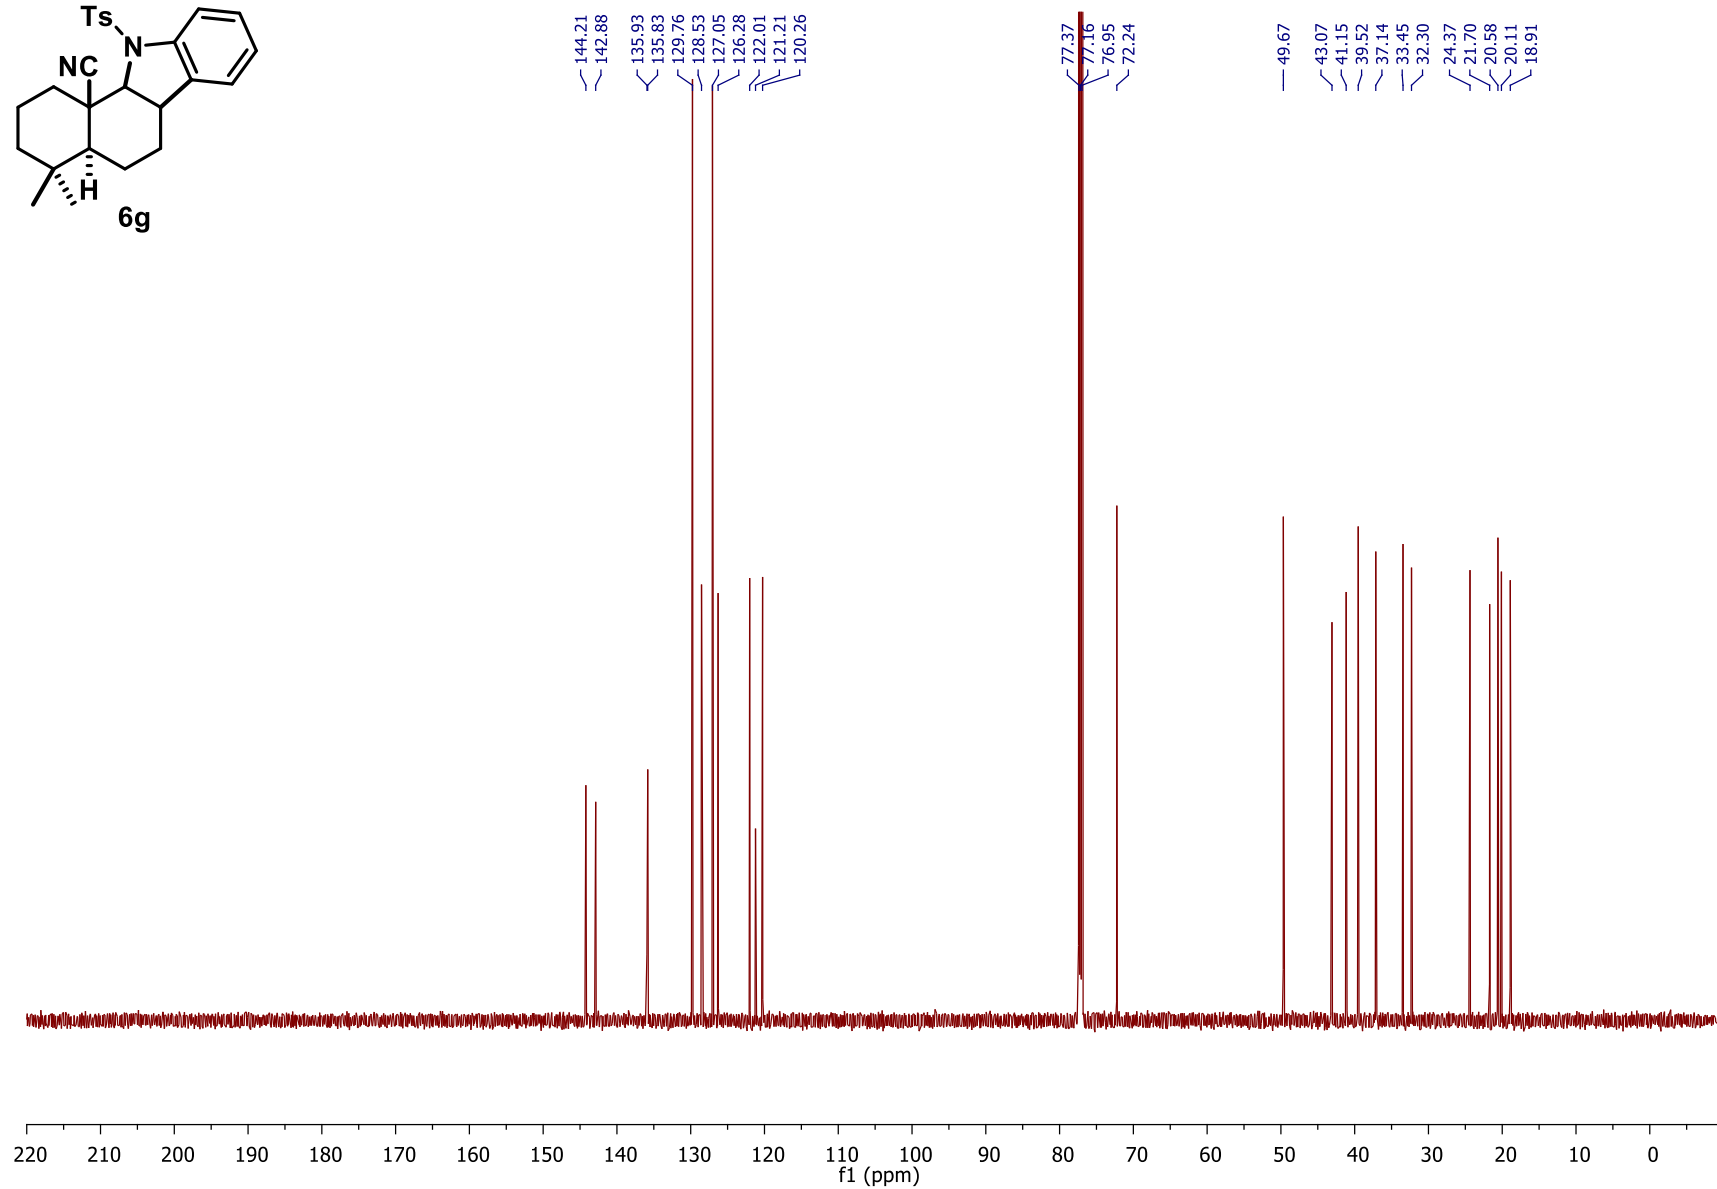

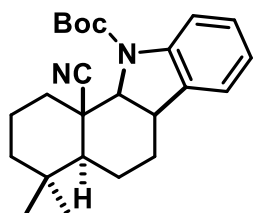

(mixture of rotamers)

6f

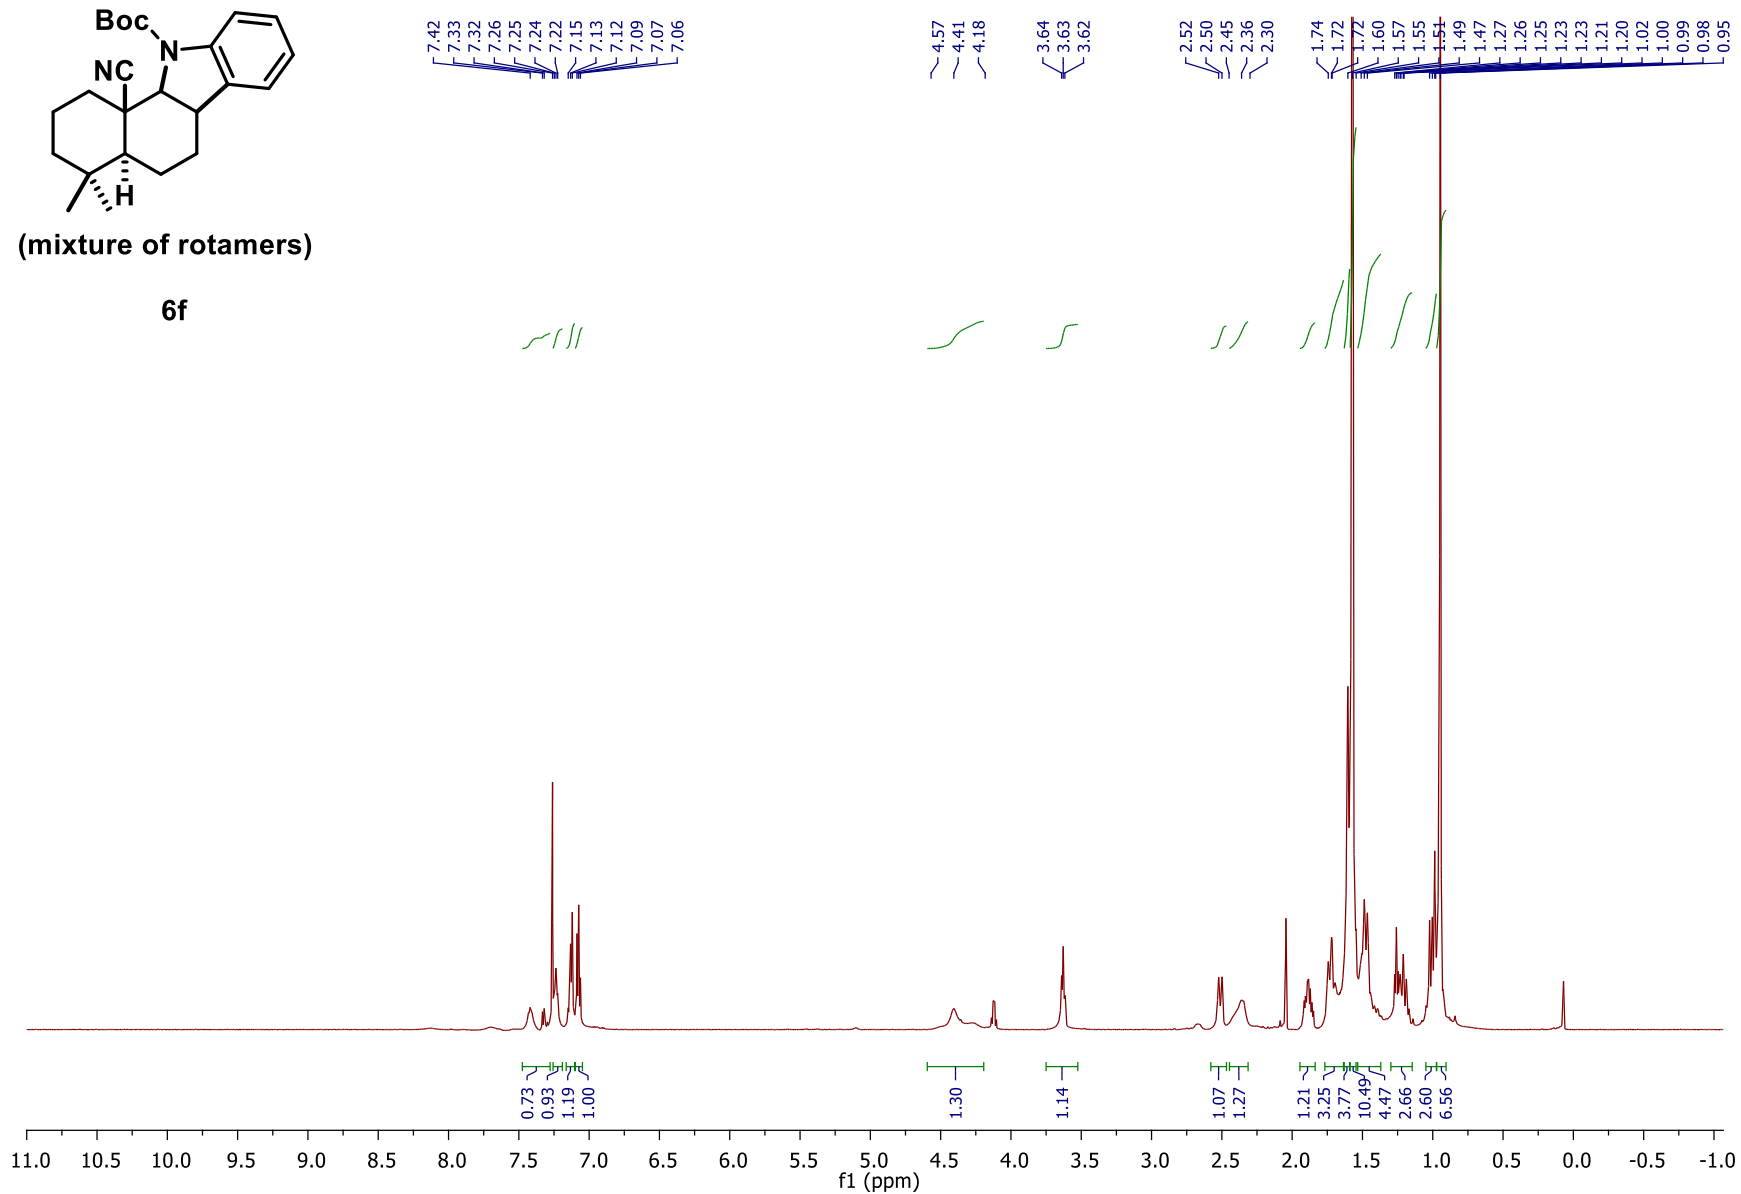

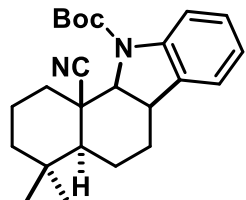

(mixture of rotamers)

6f

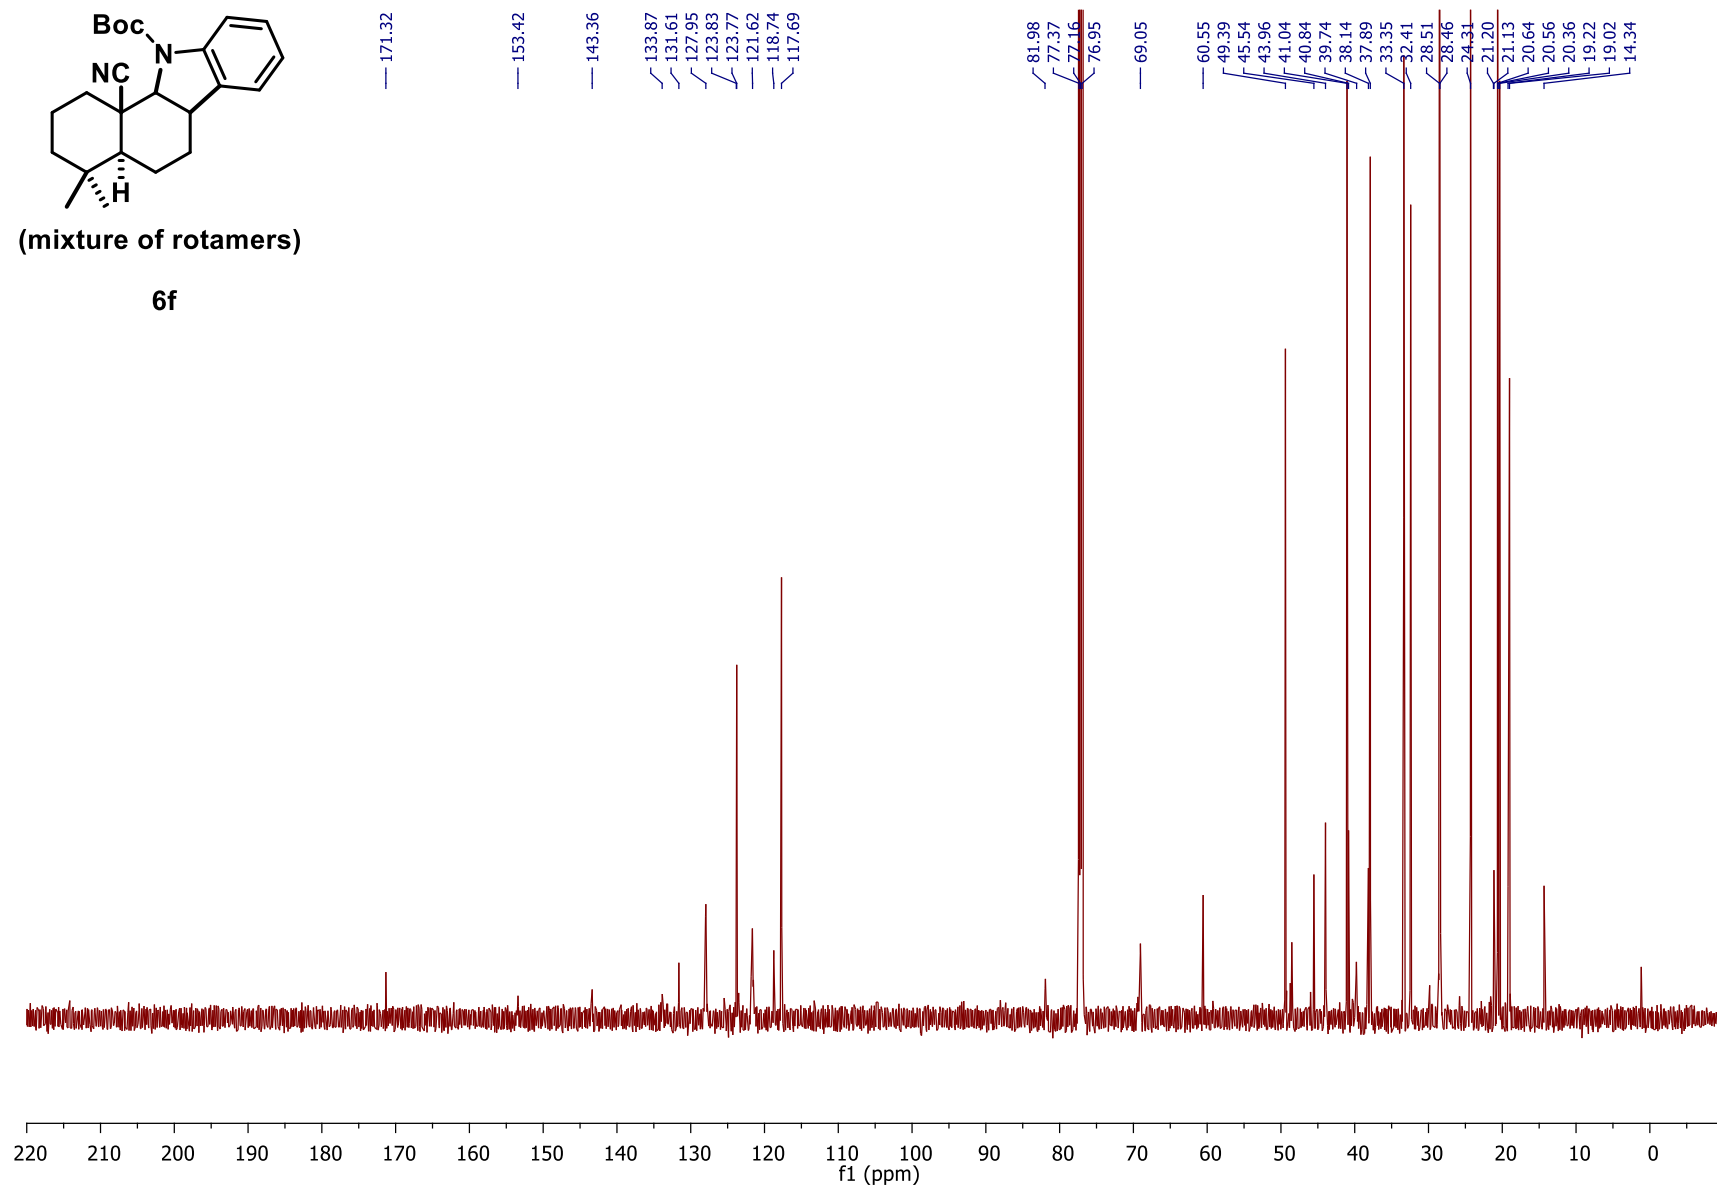

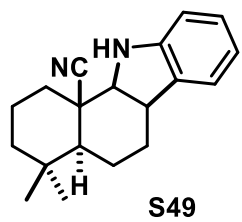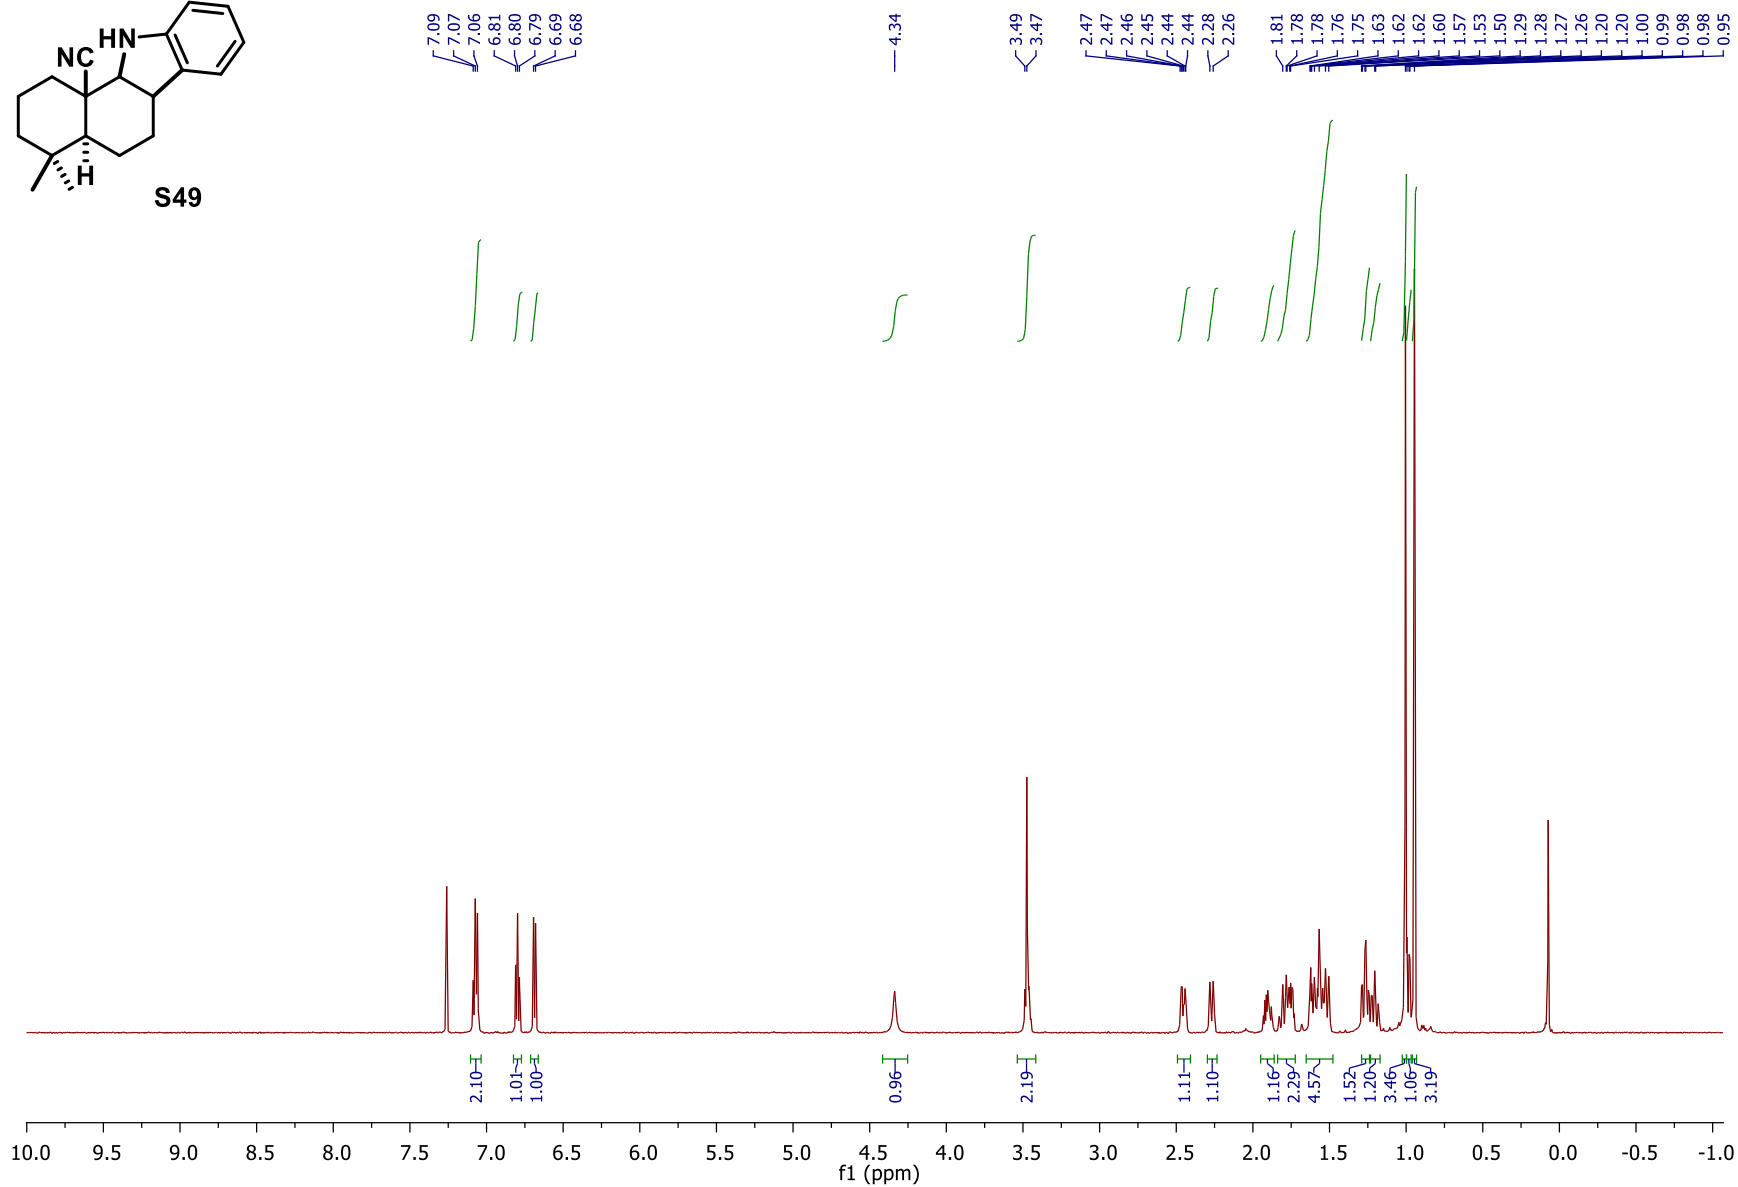



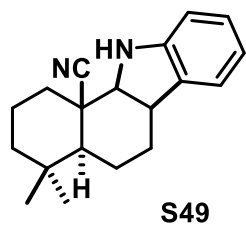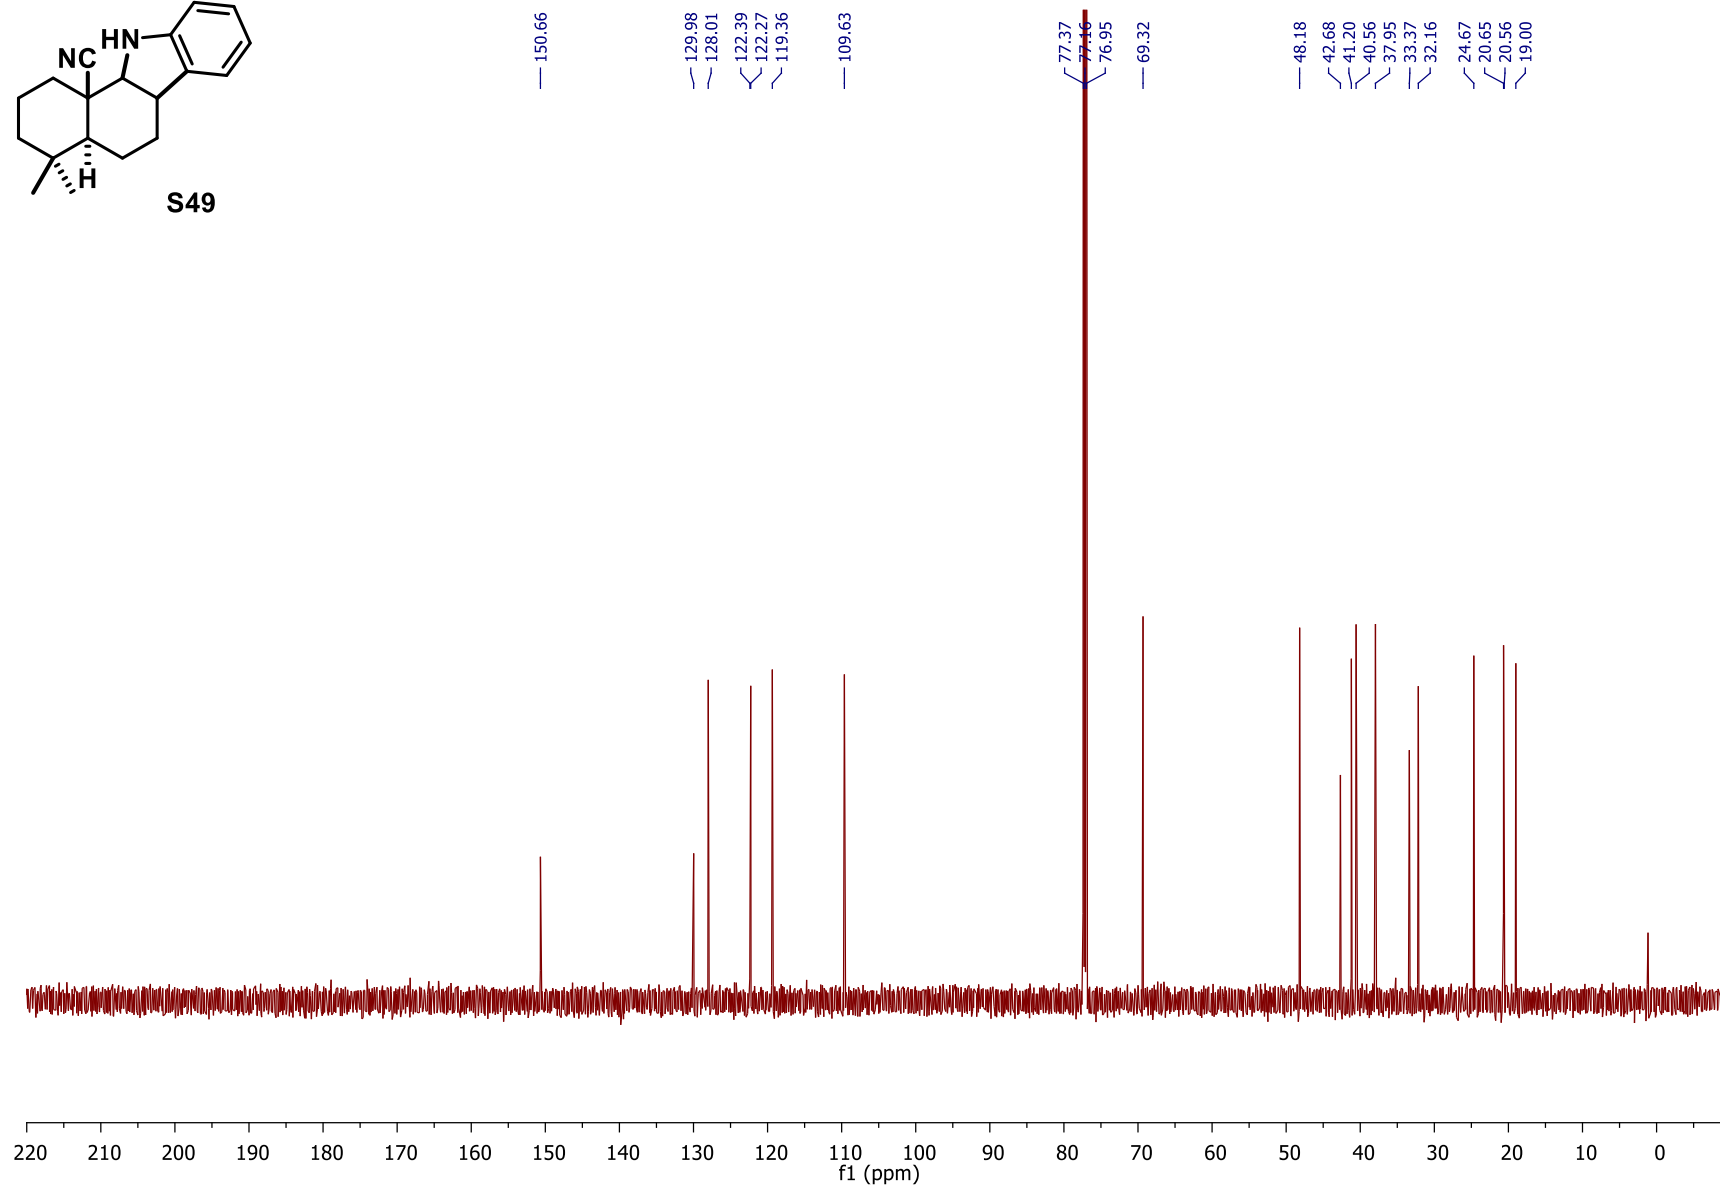

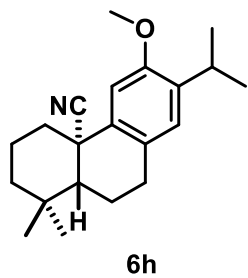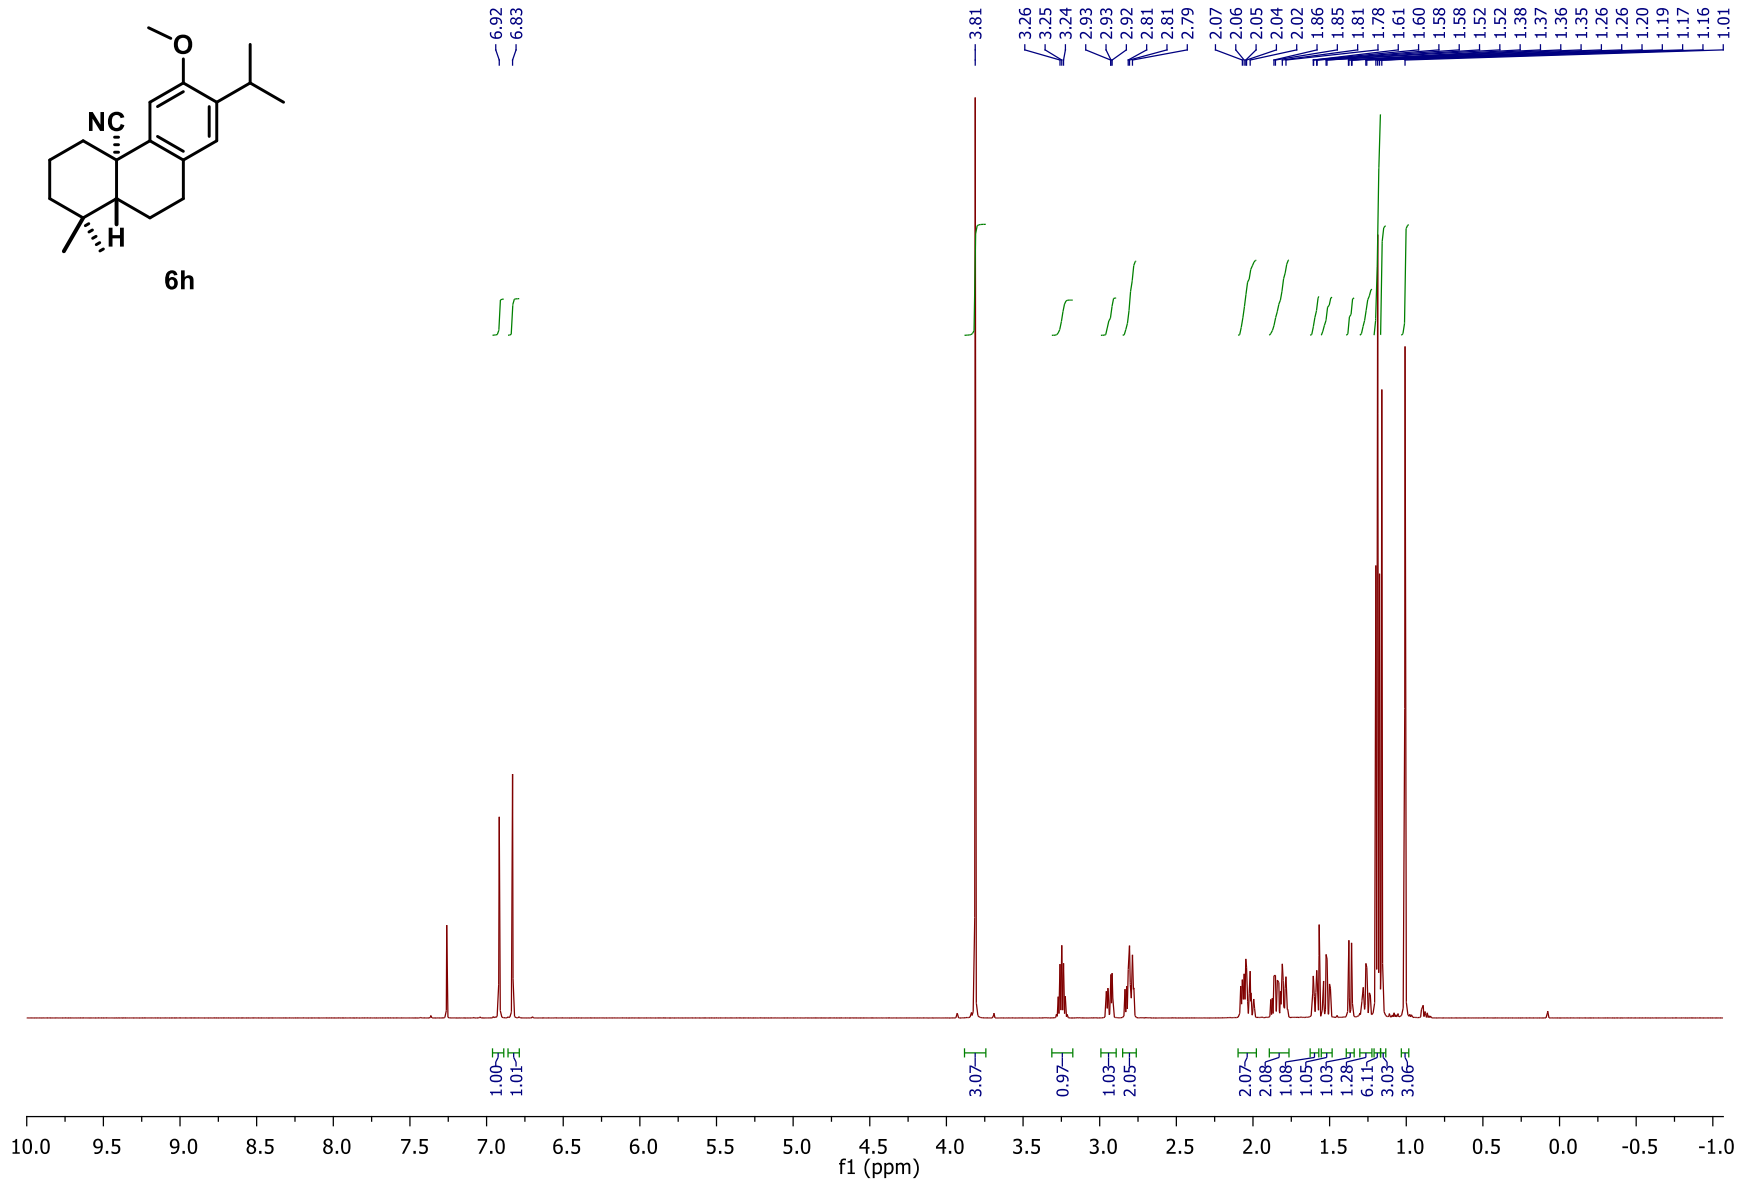

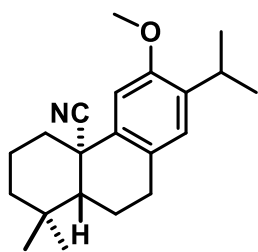

6h

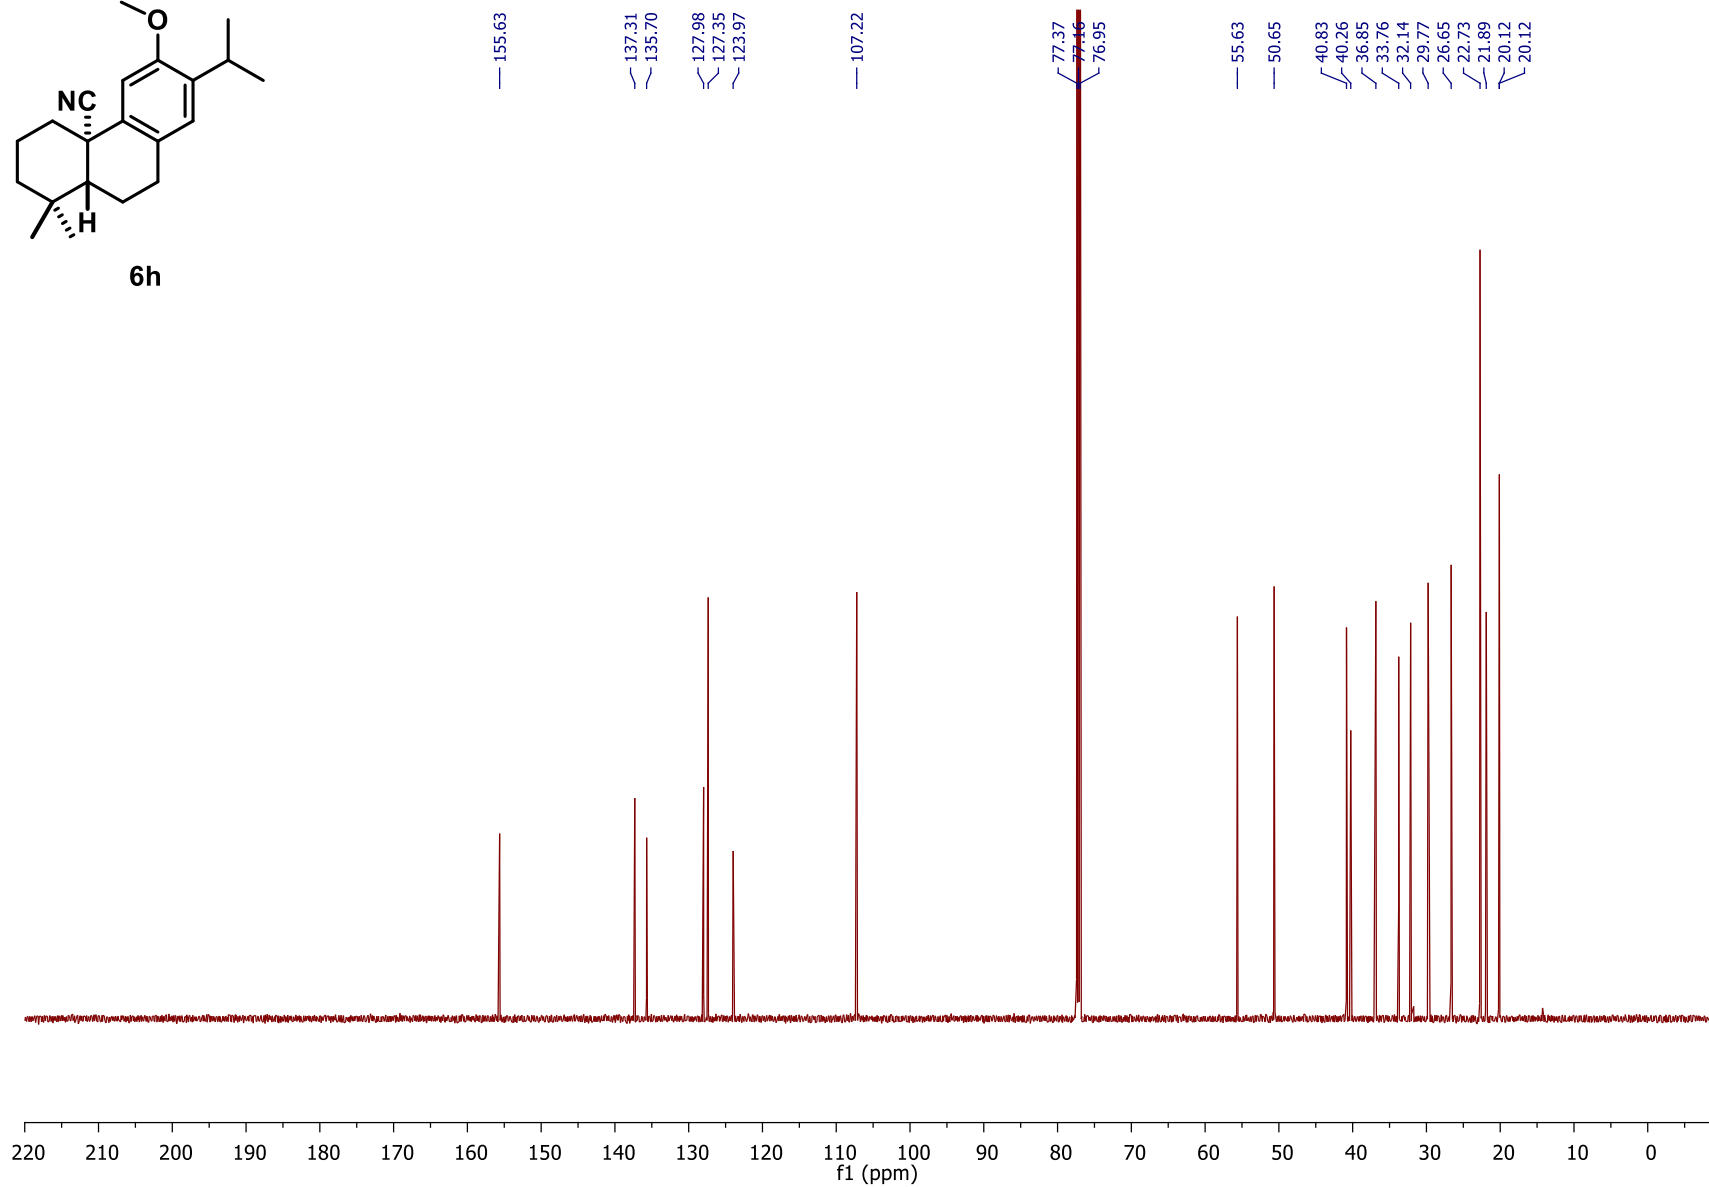

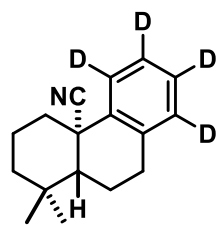

29

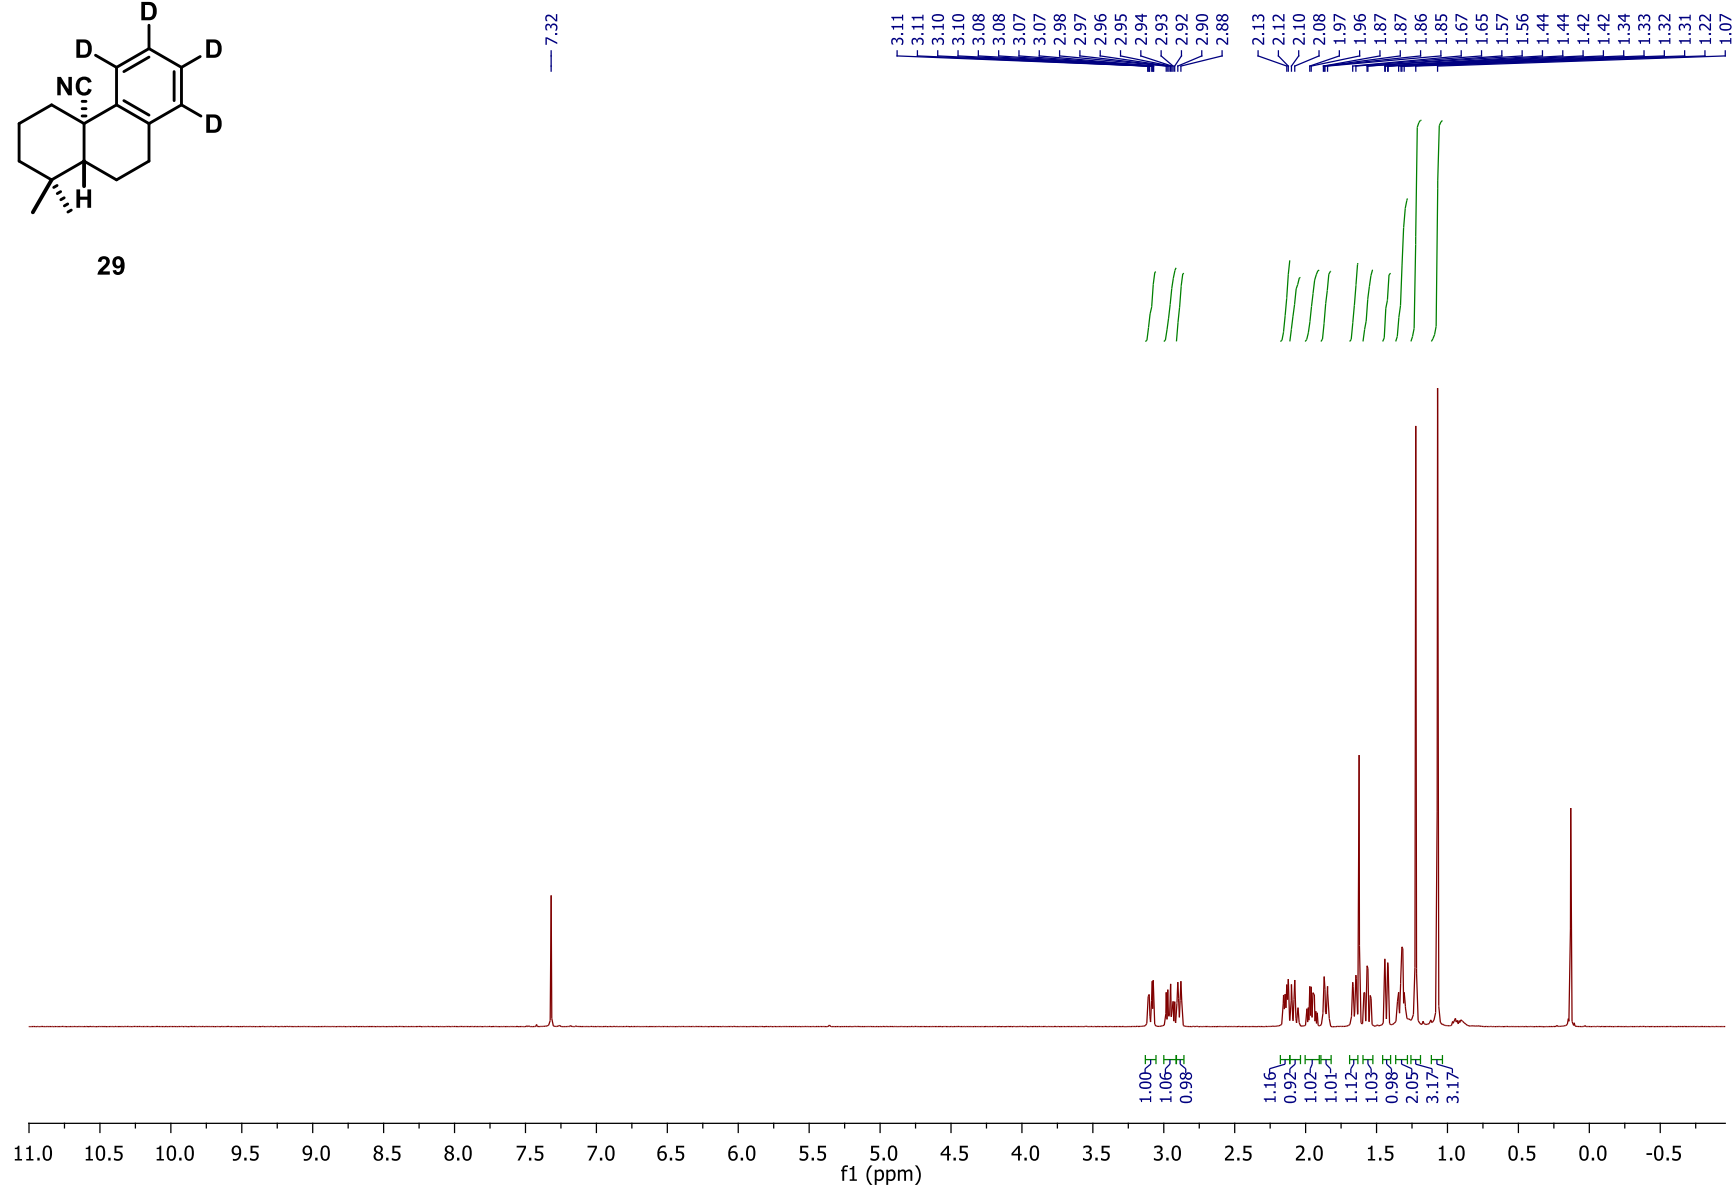

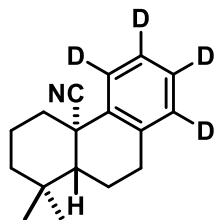

29

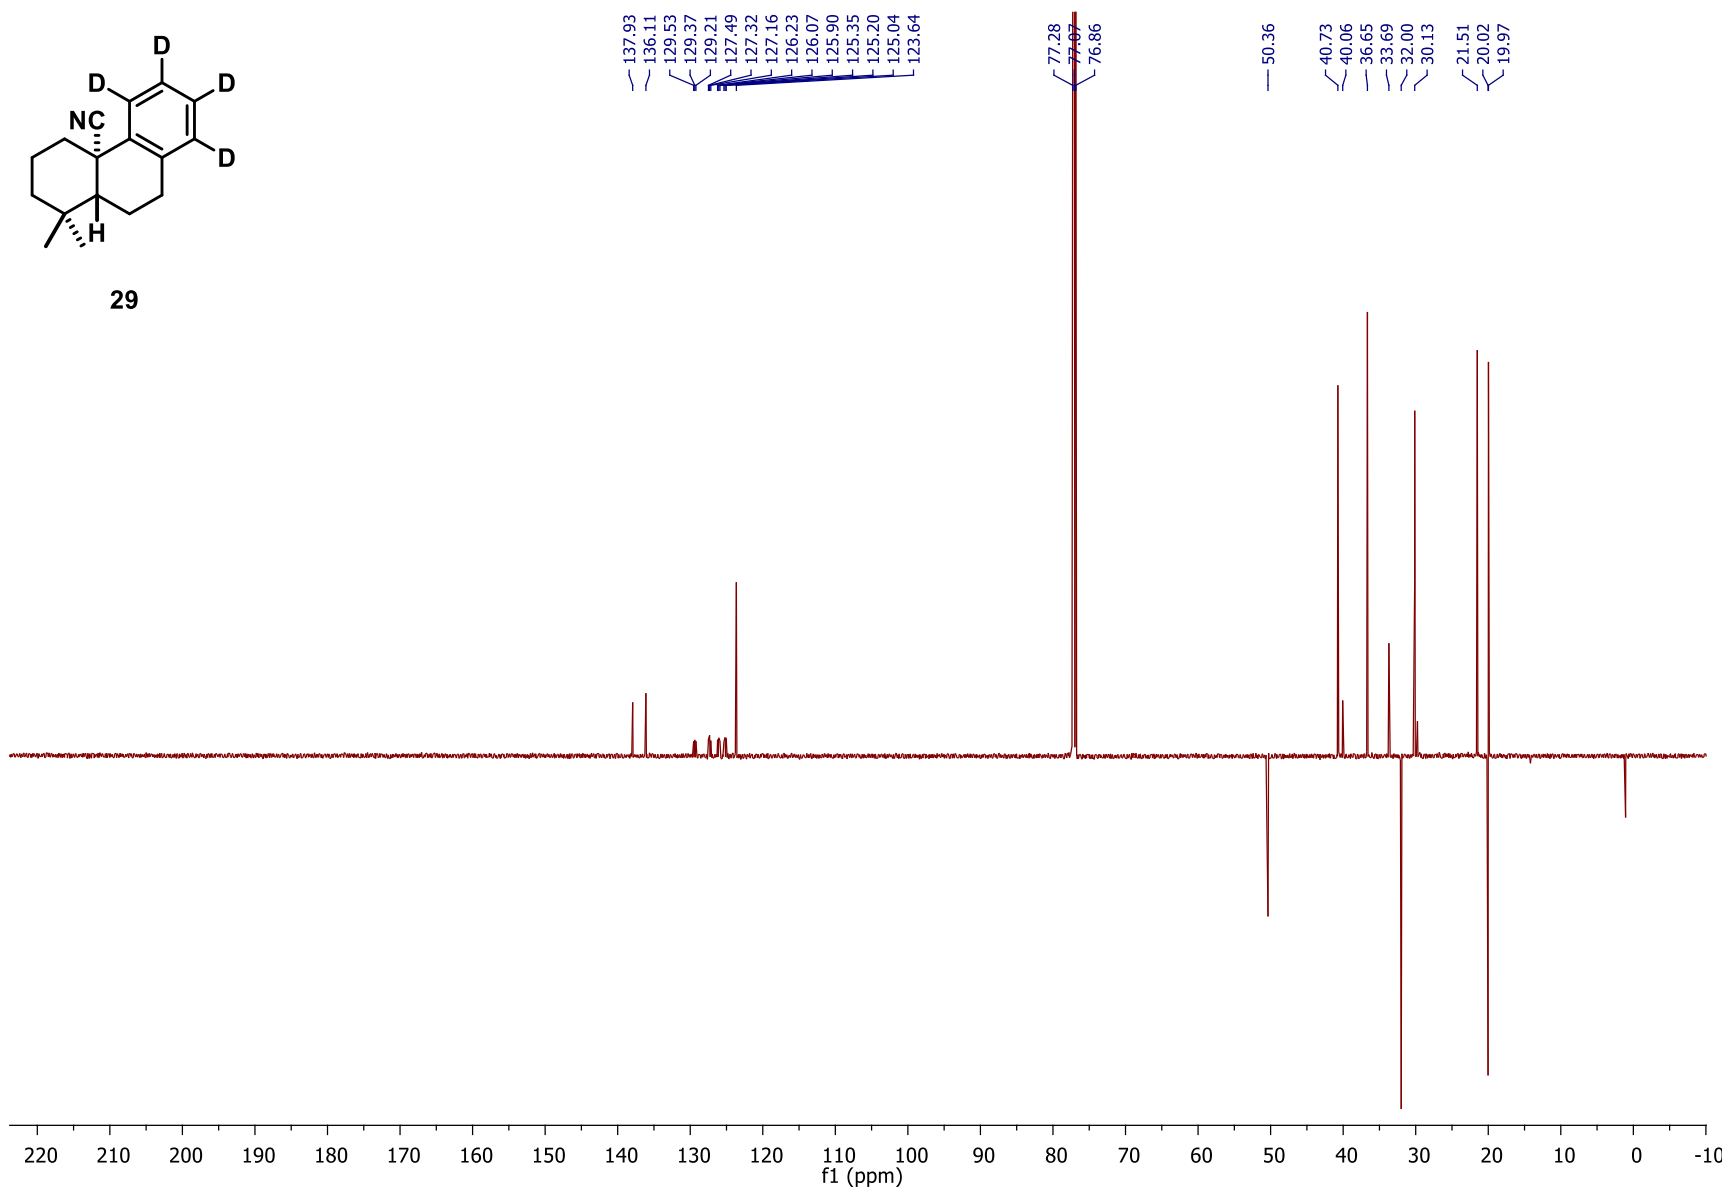

TOF MS ES+  
749

1:100dil

DV\_4\_215\_2\_a 22 (0.403)

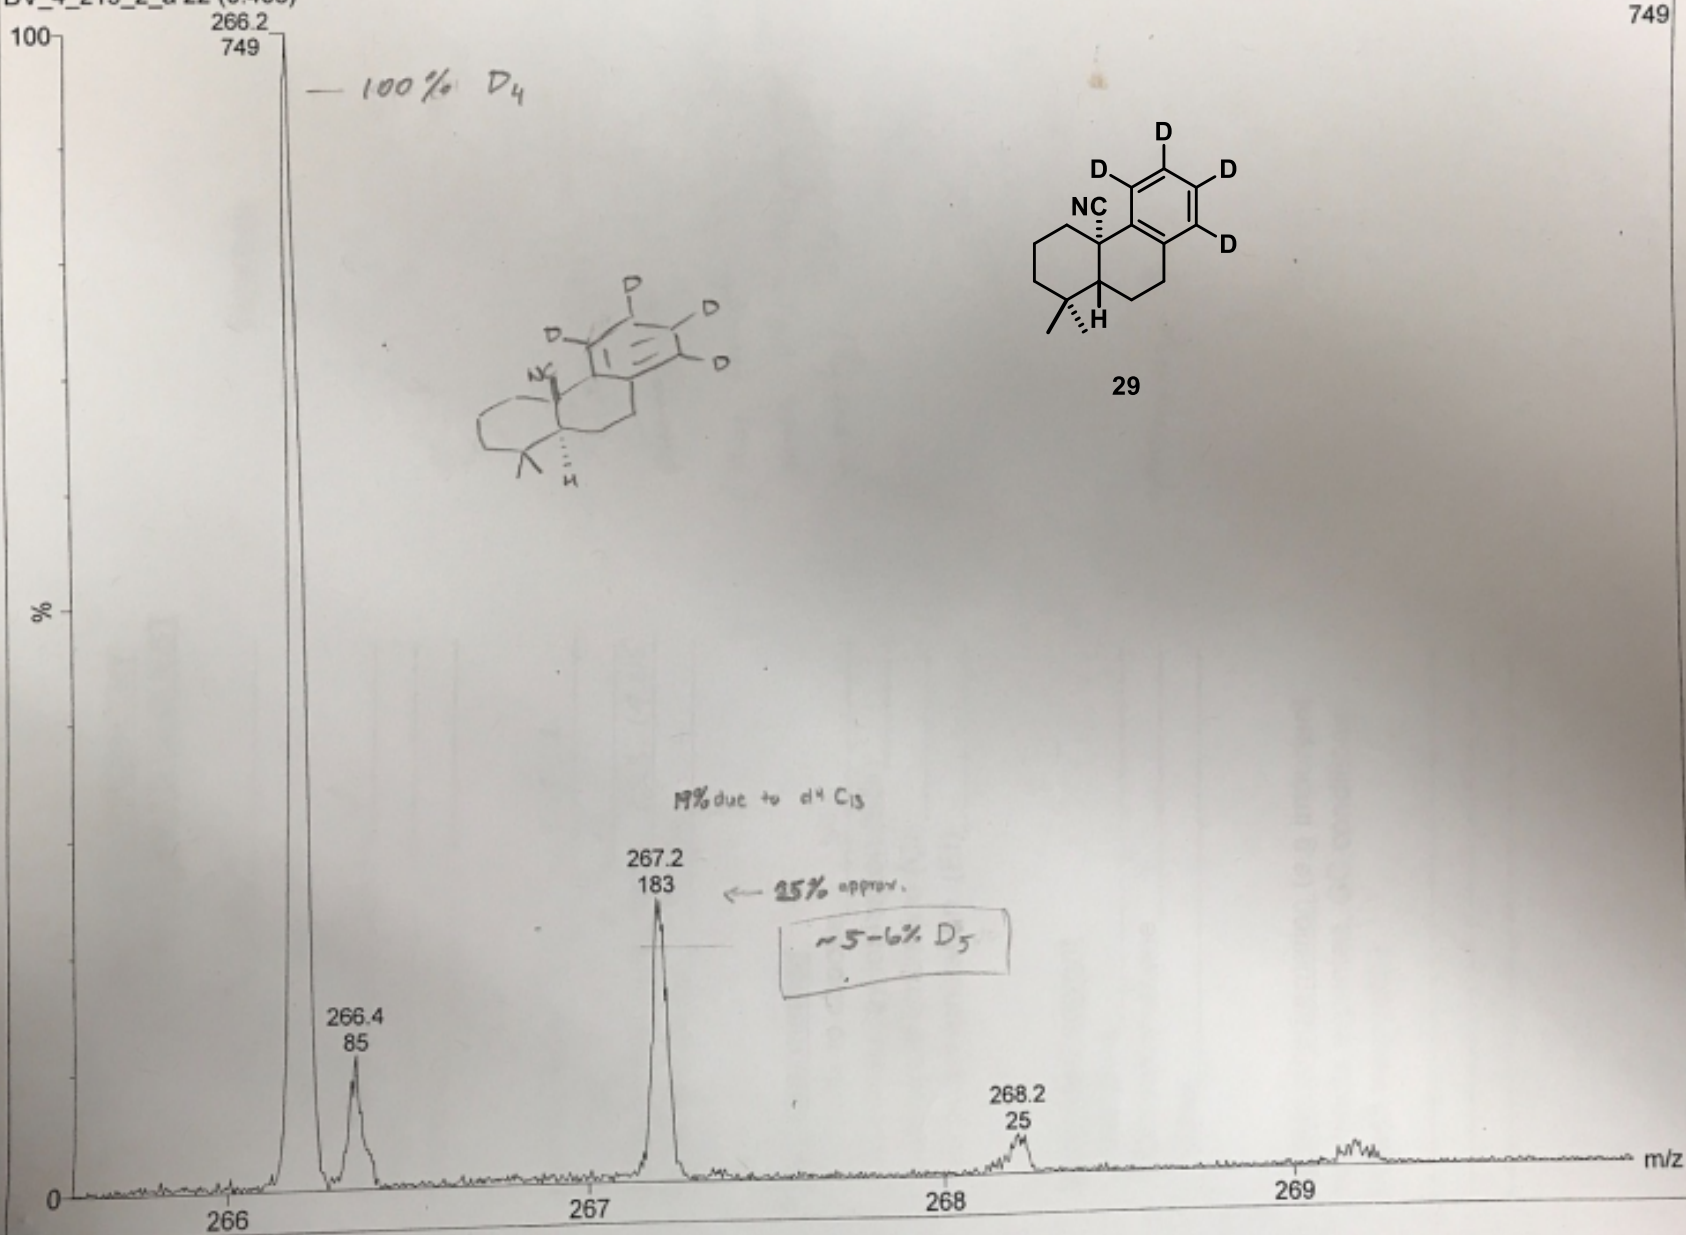

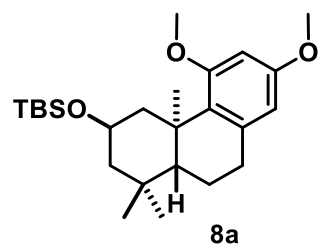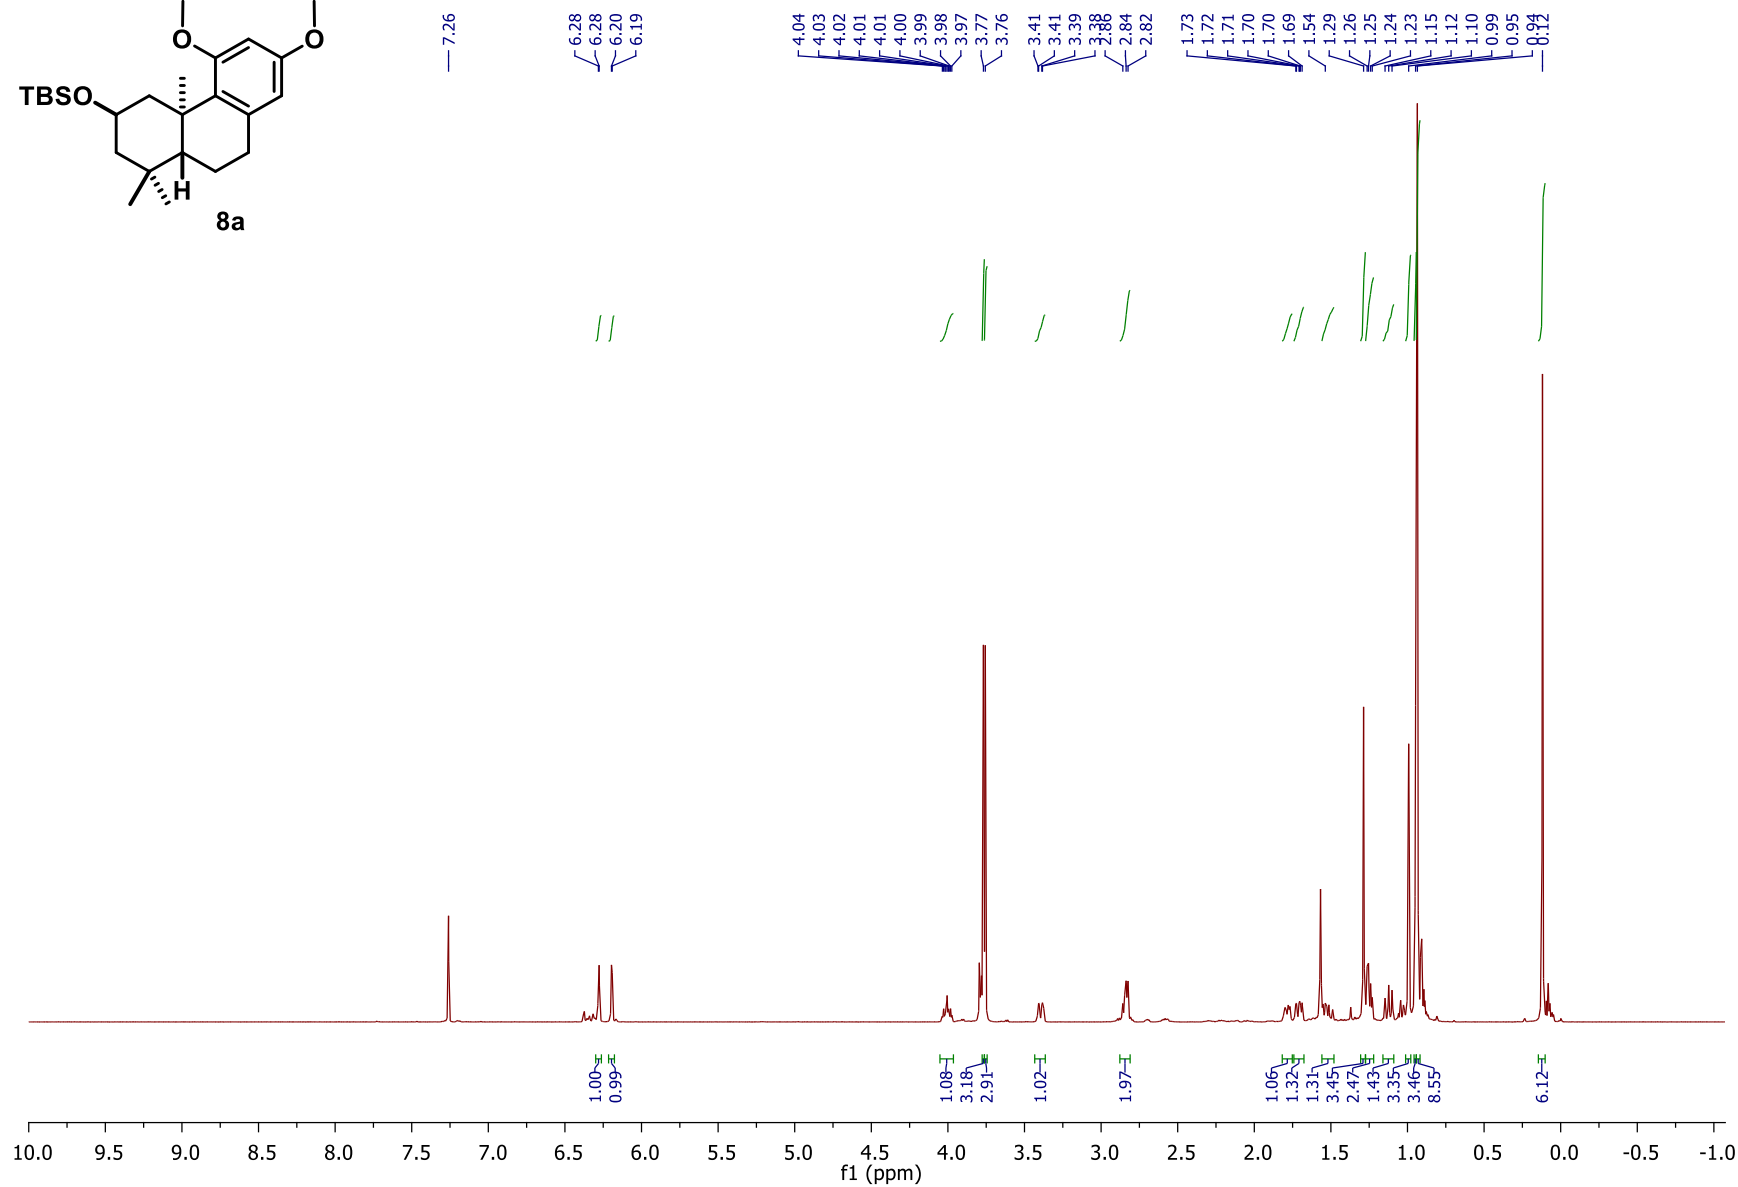

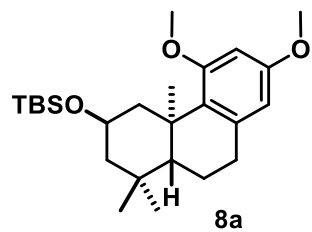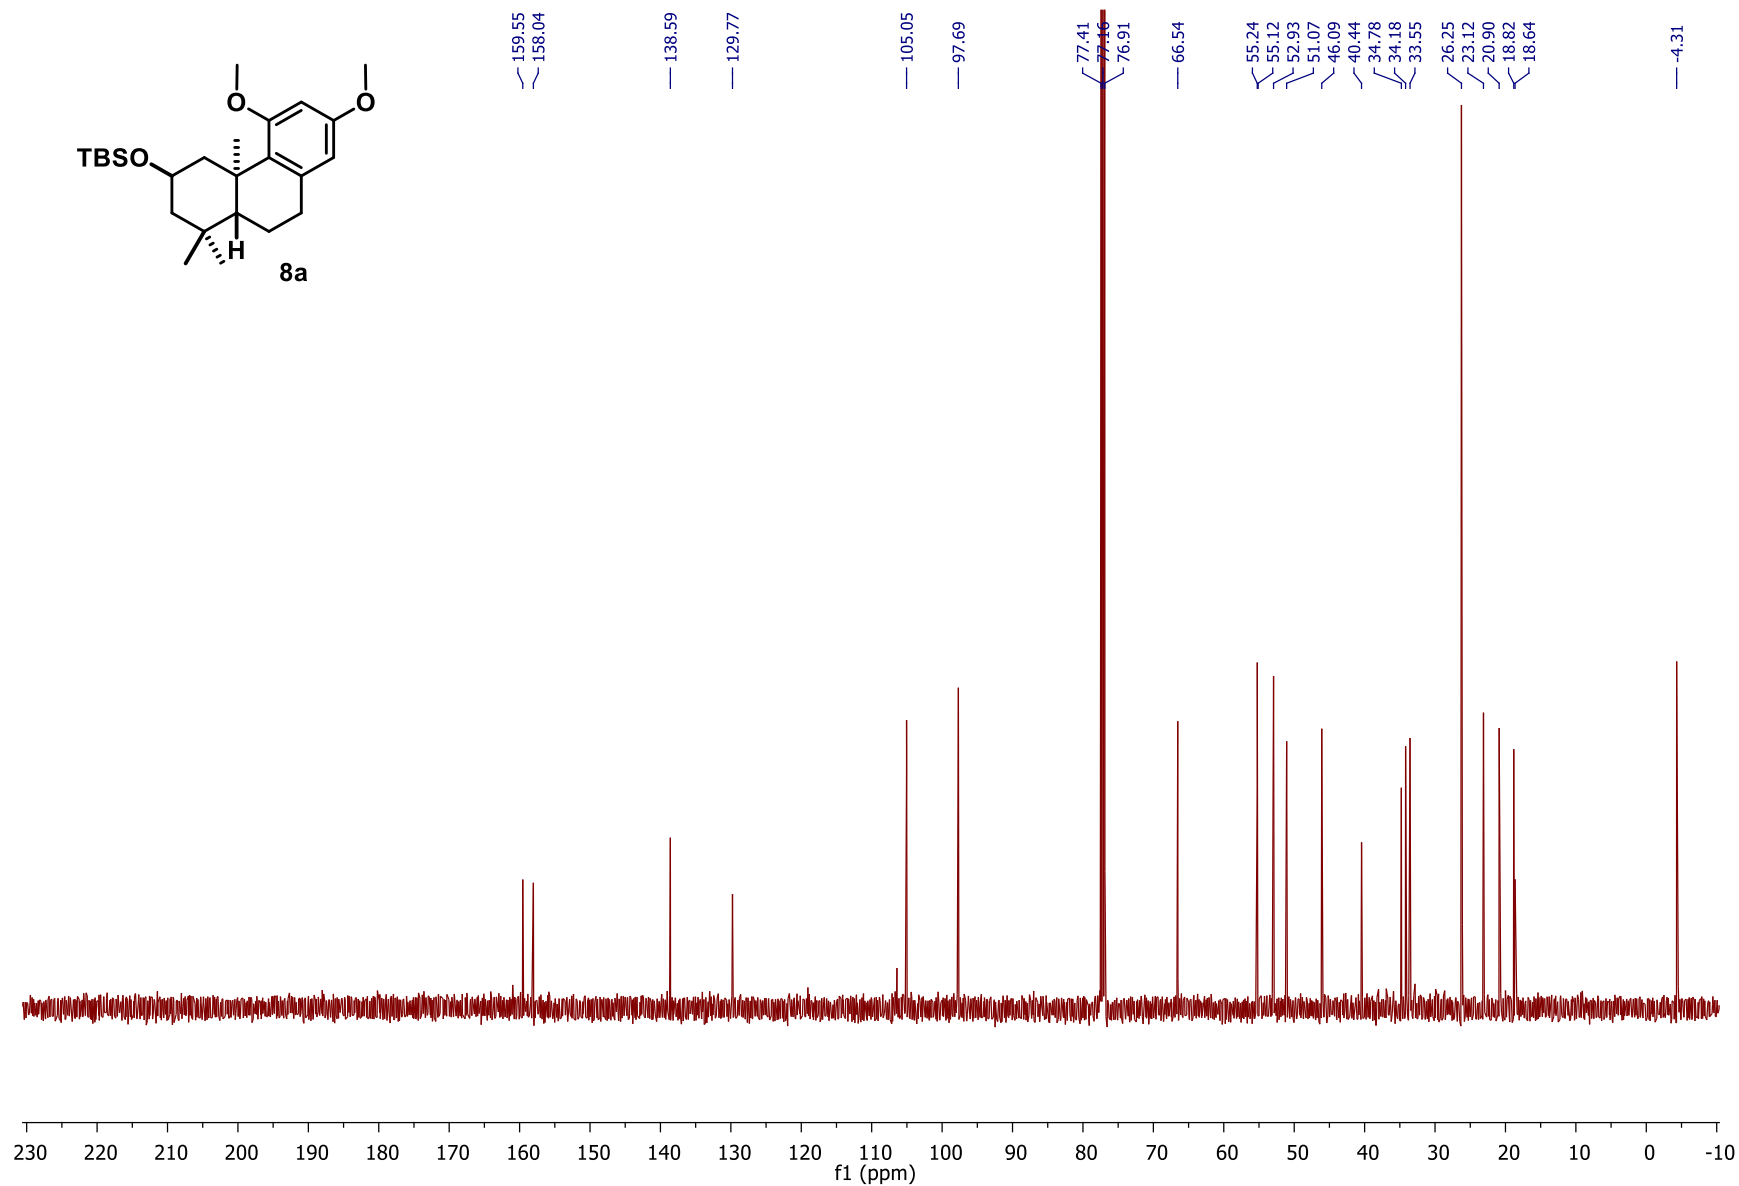



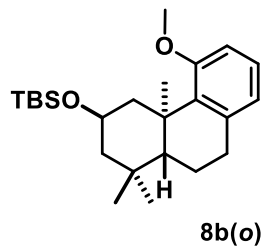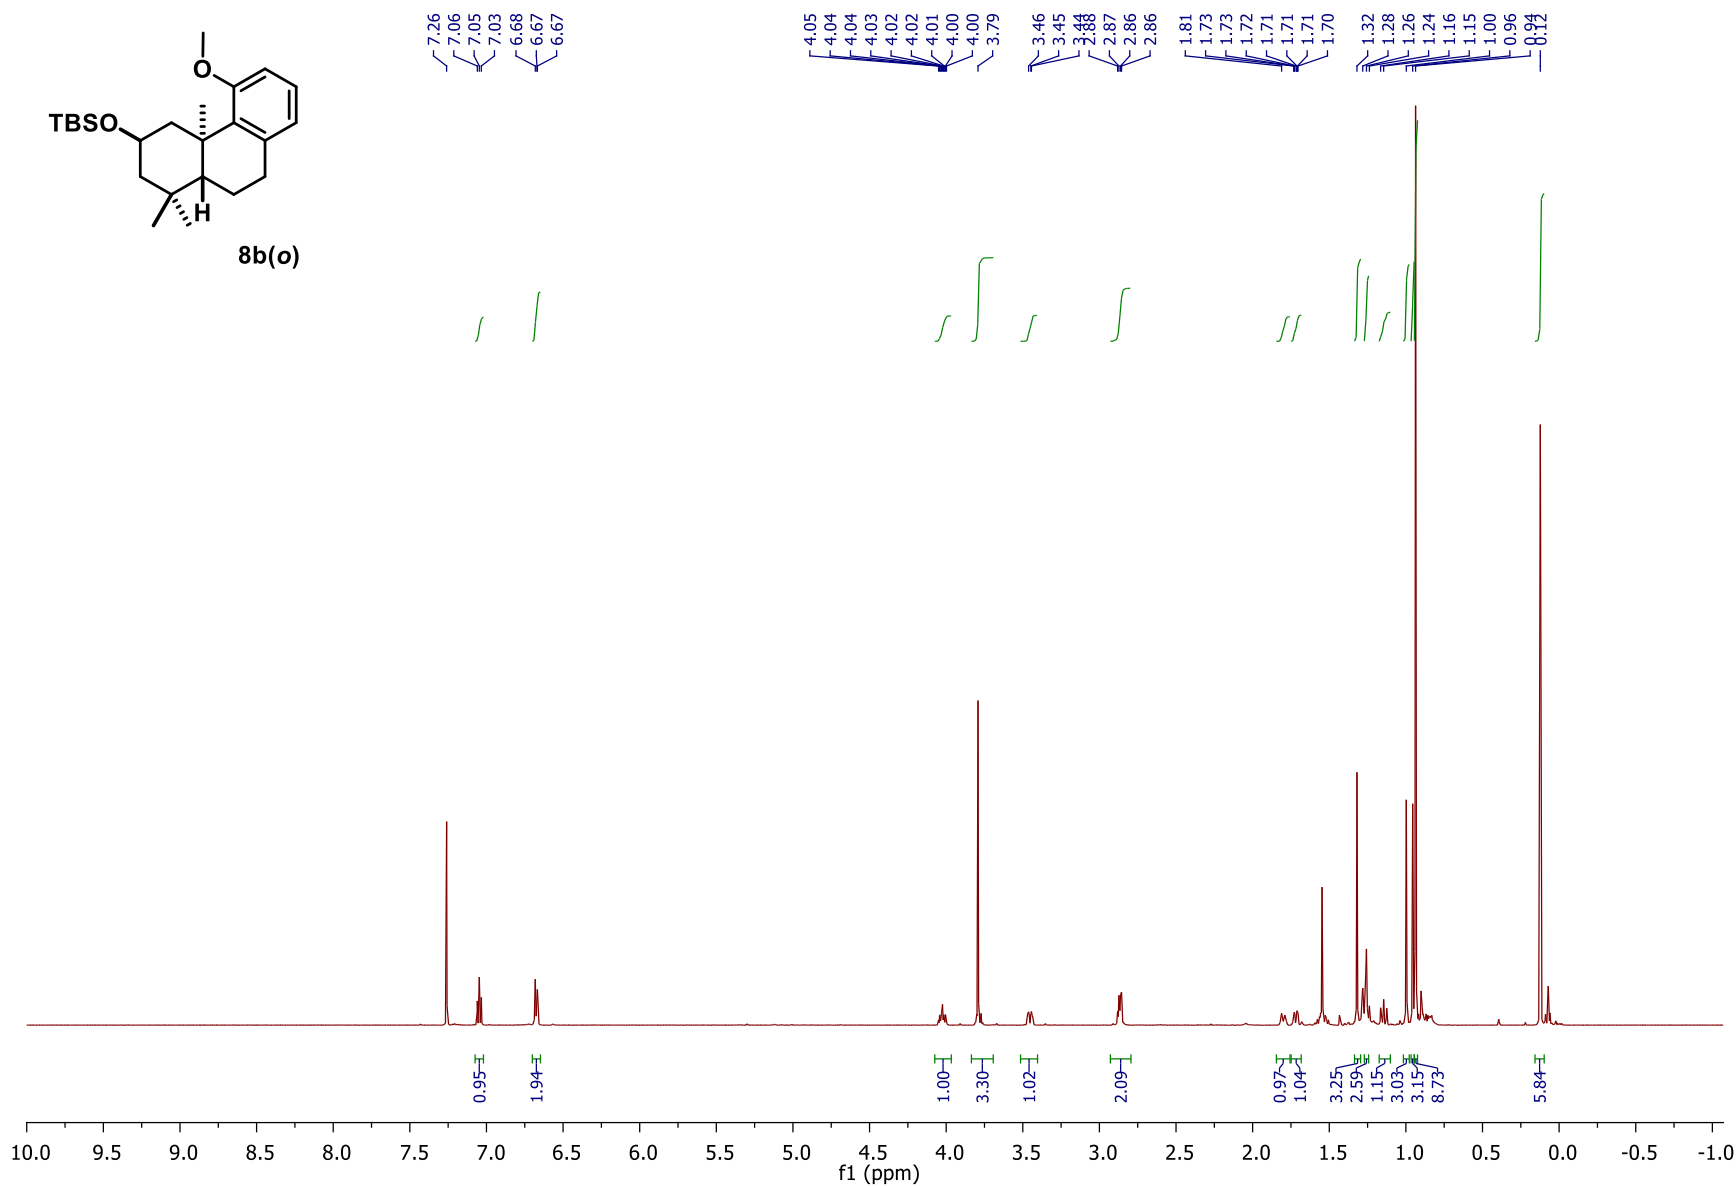

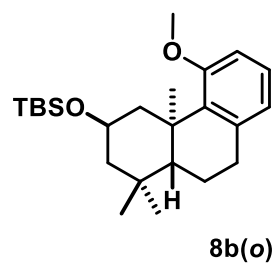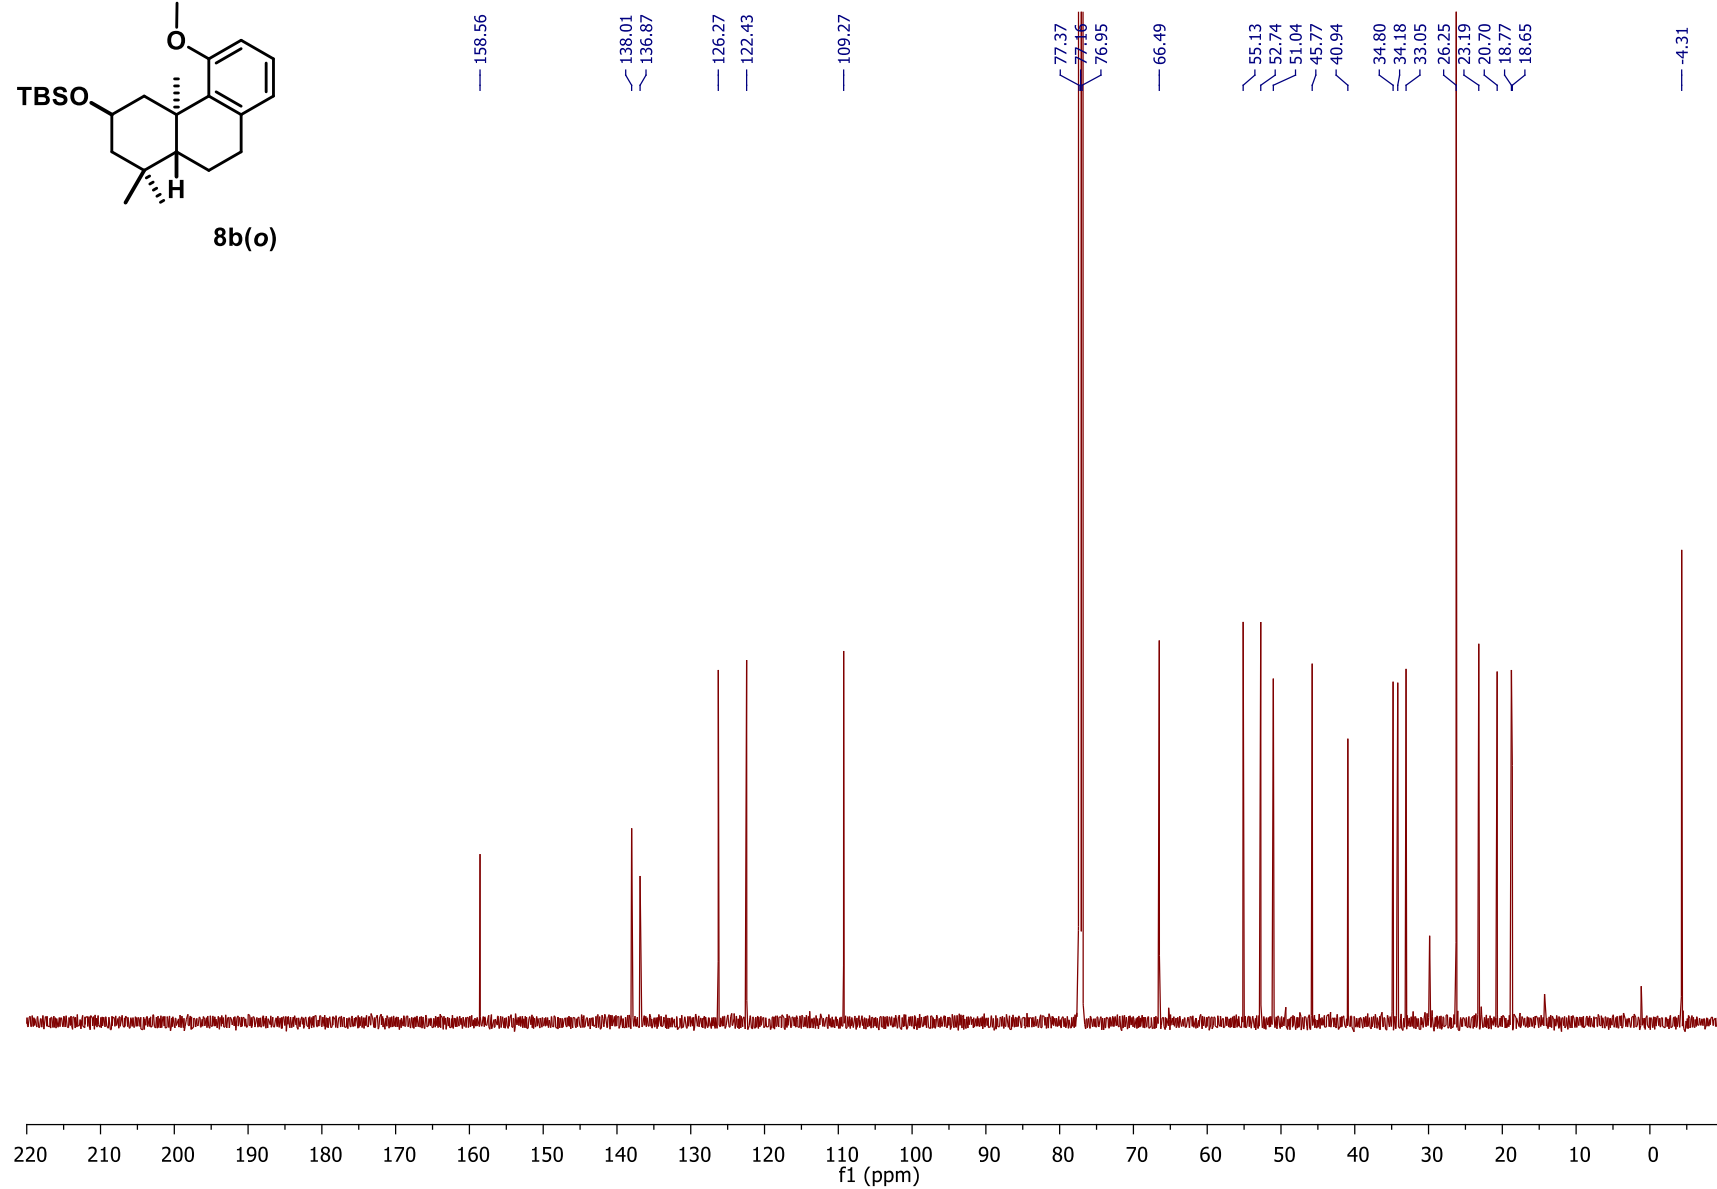

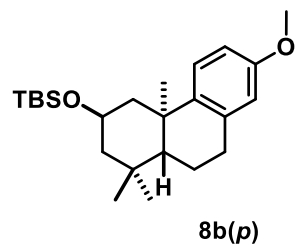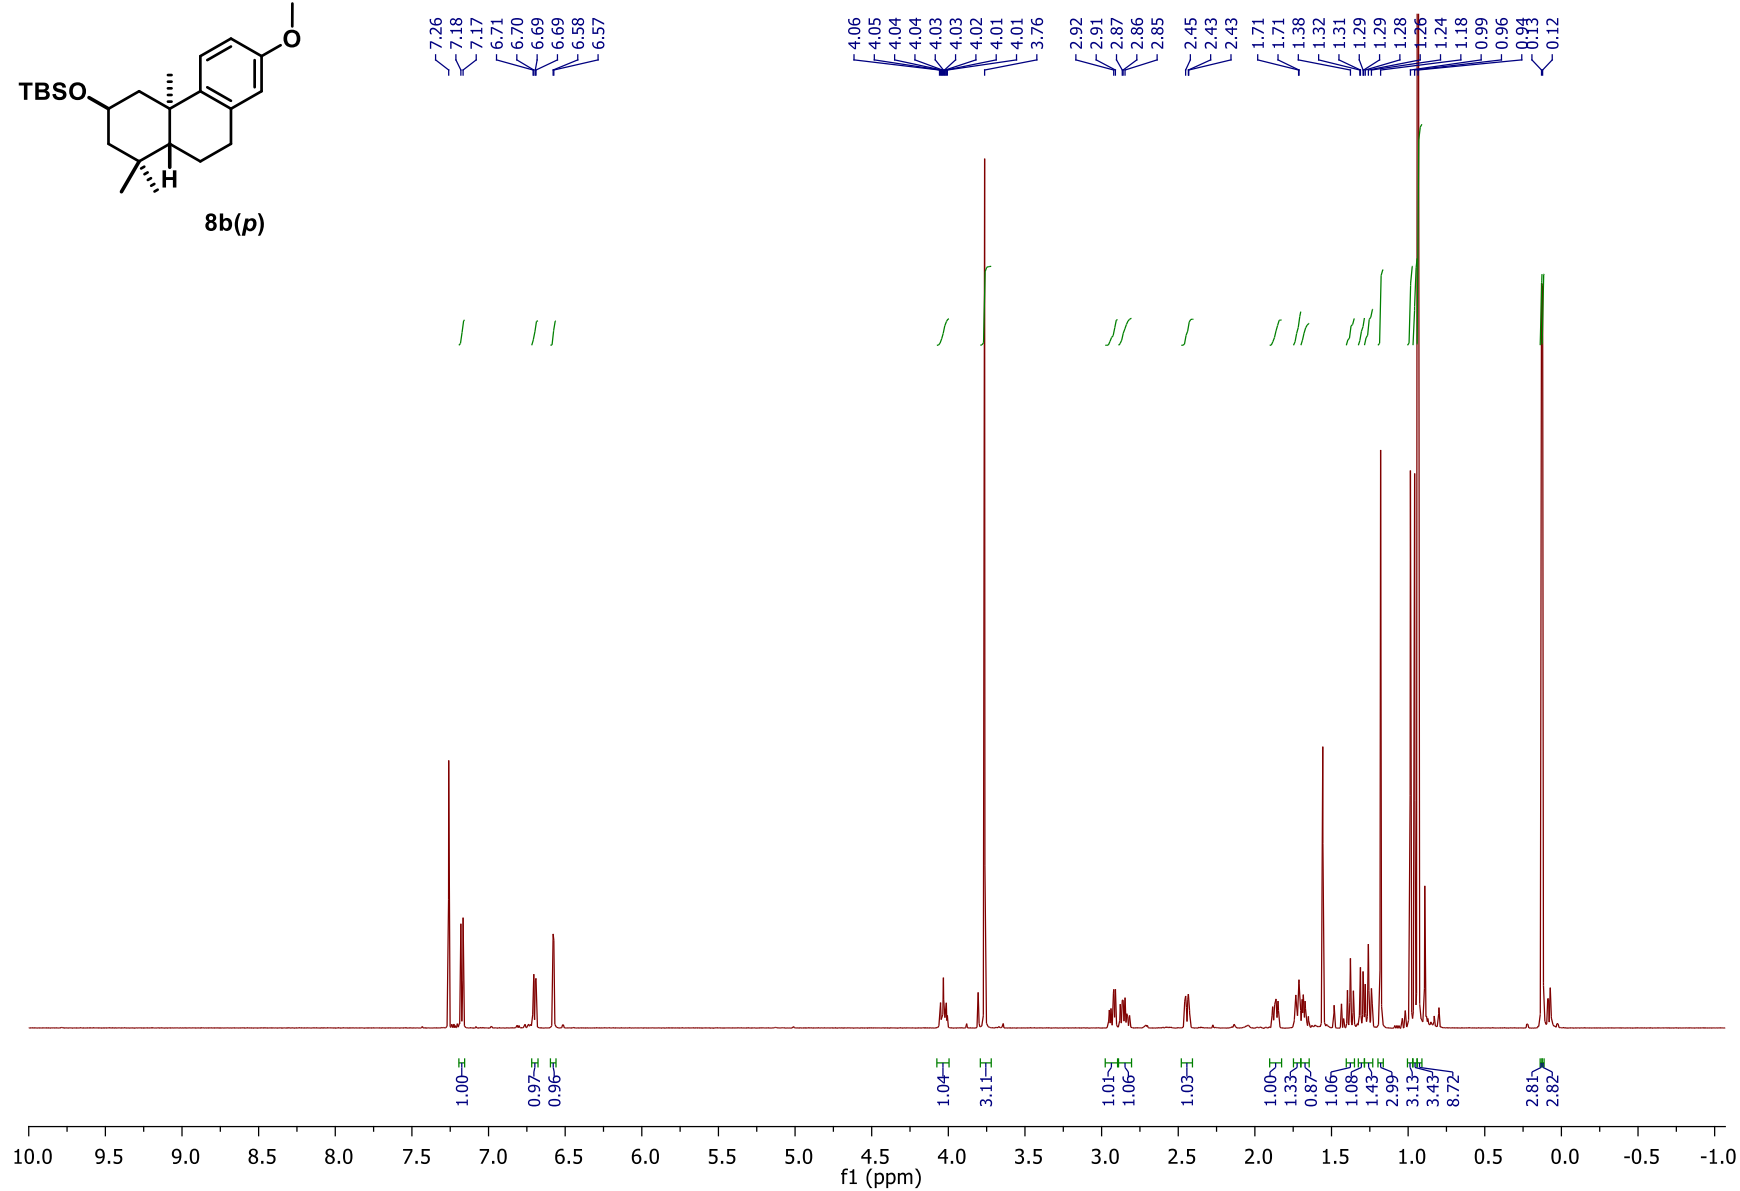

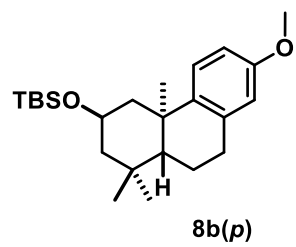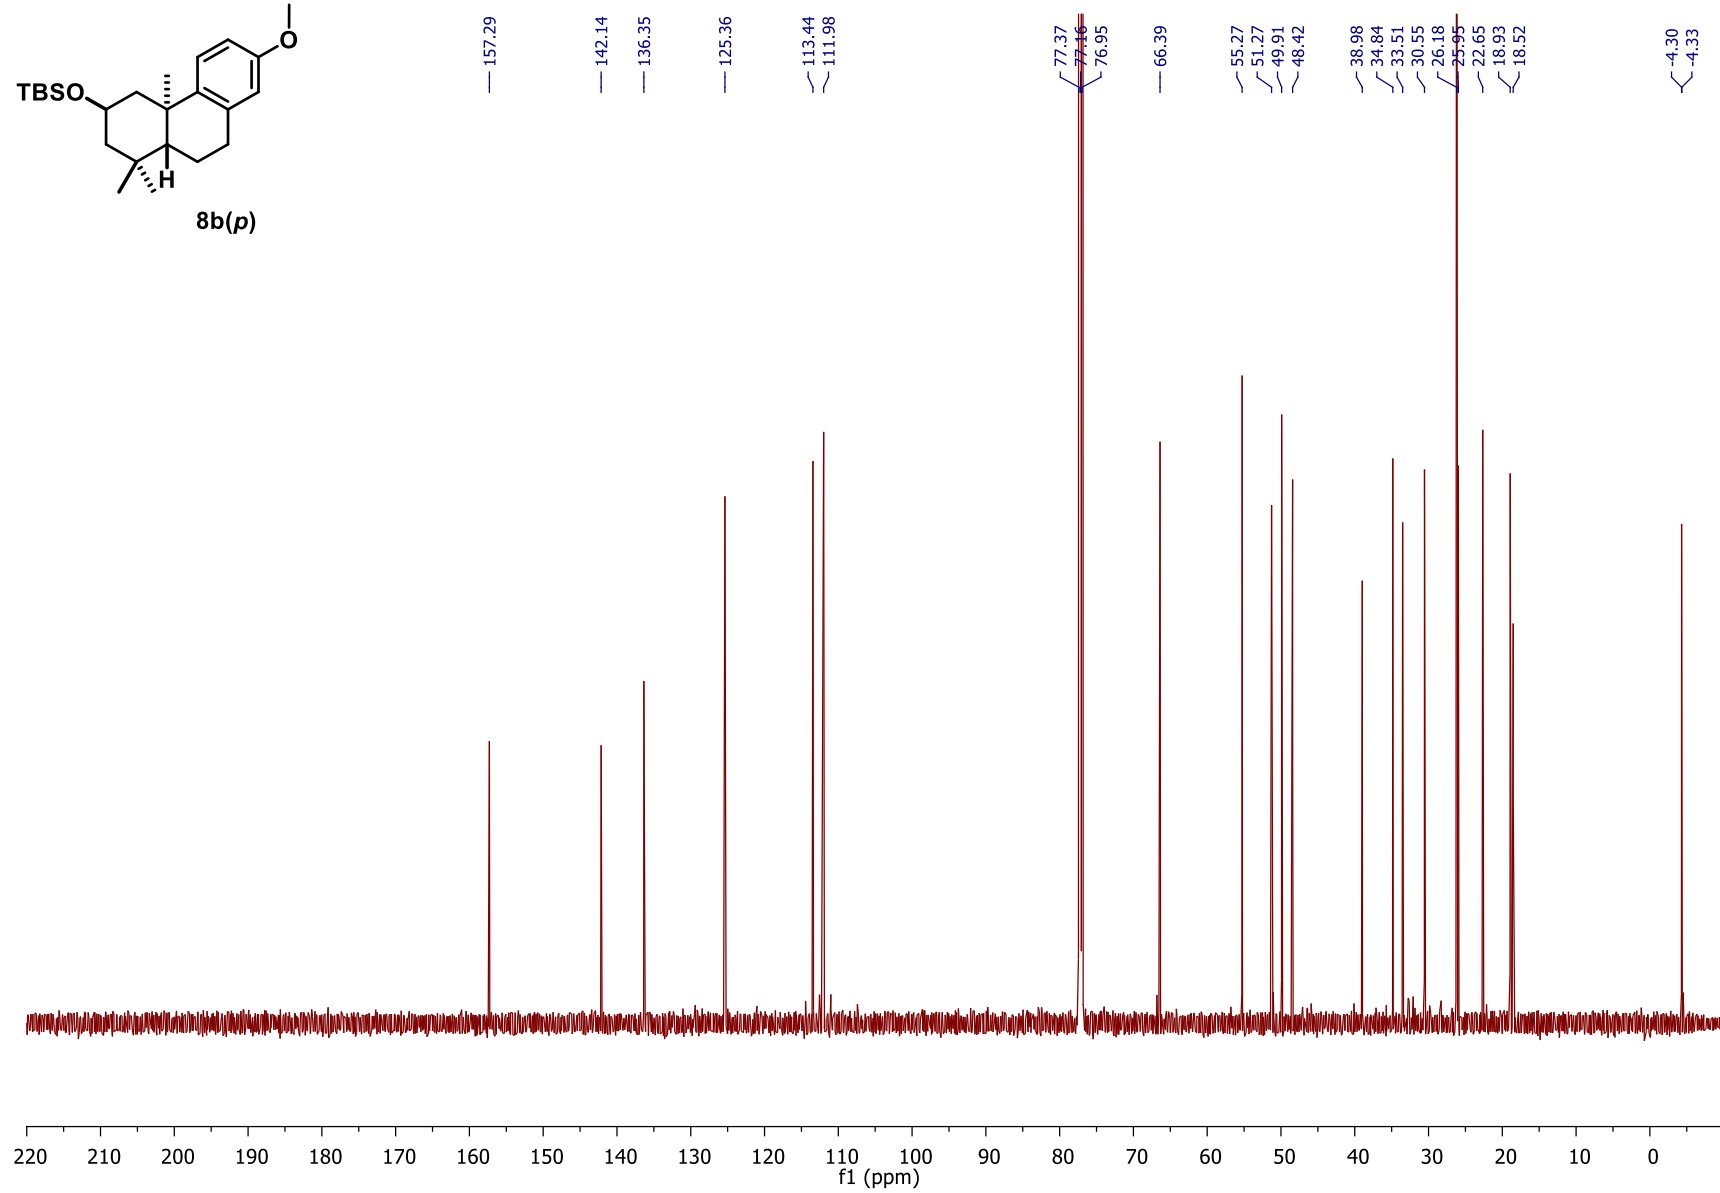

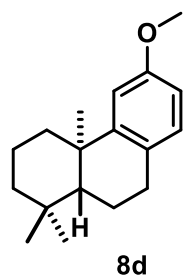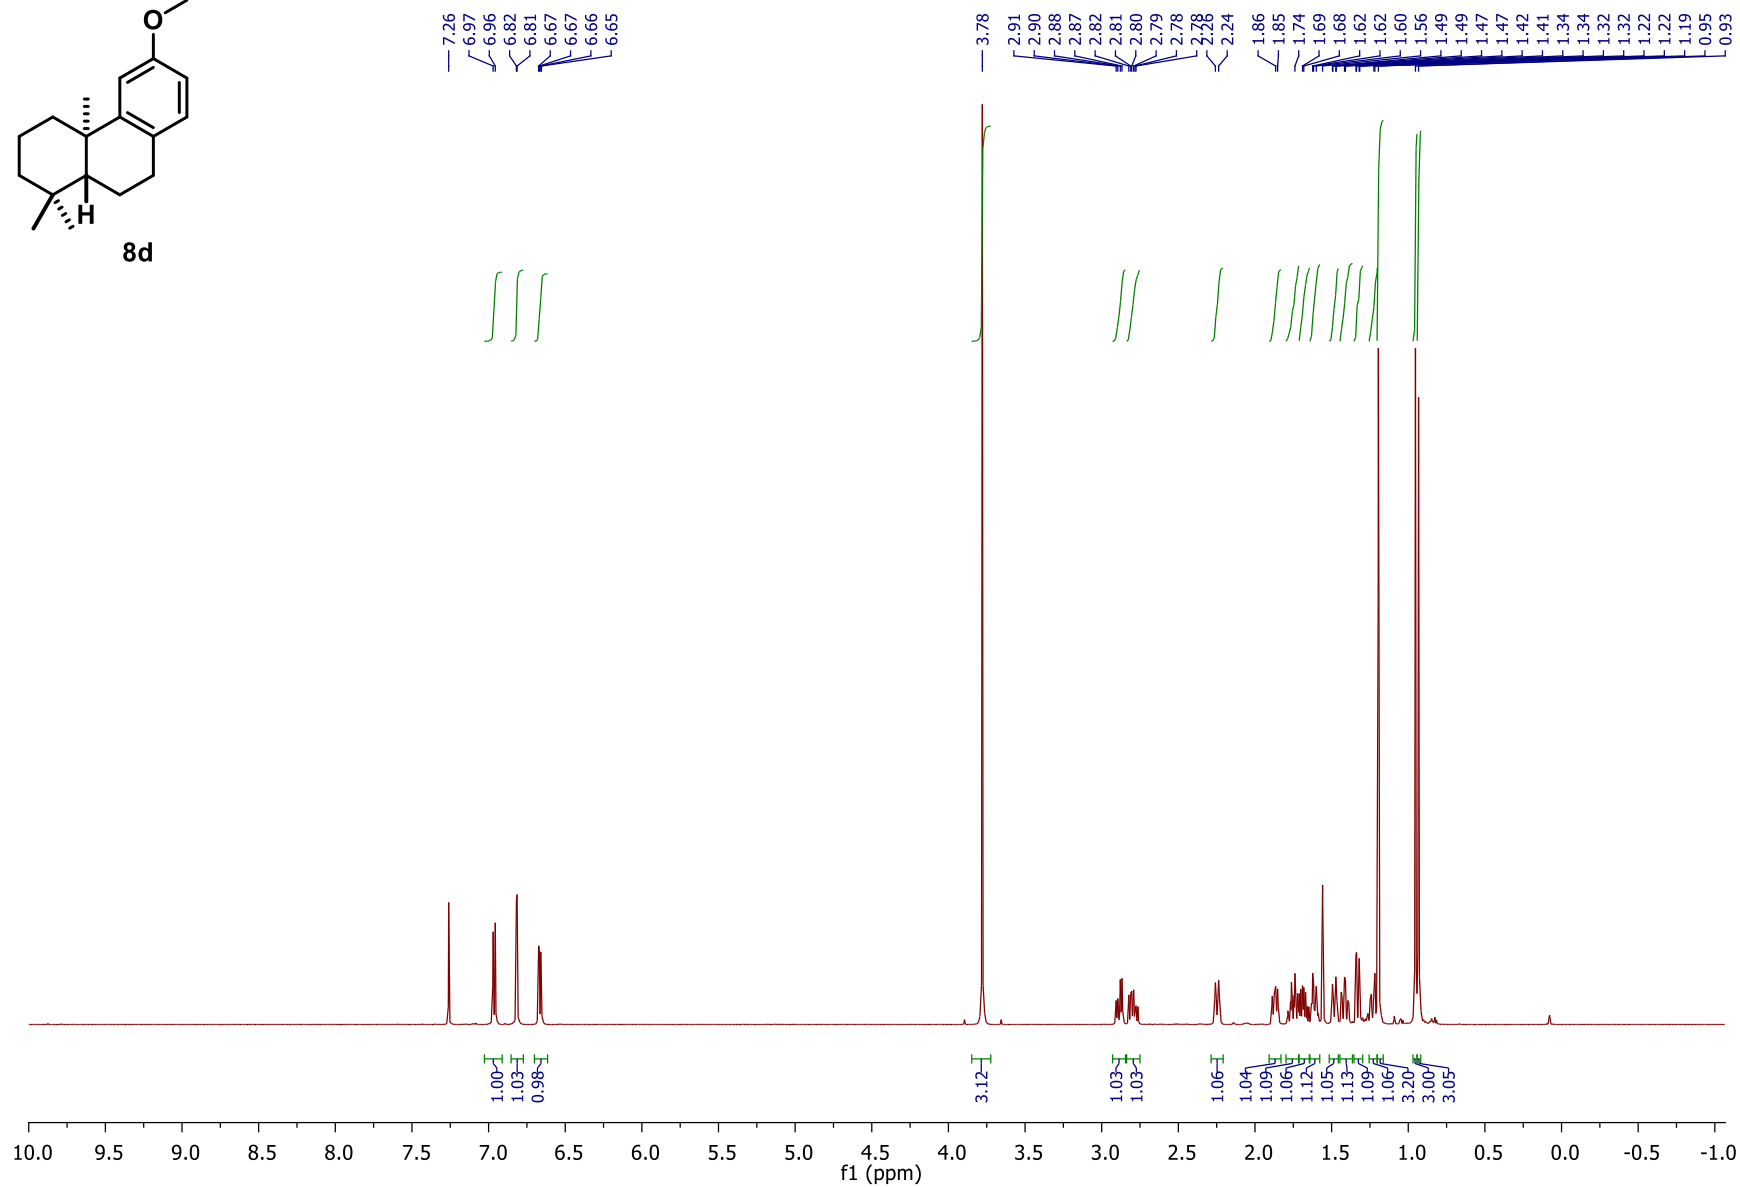

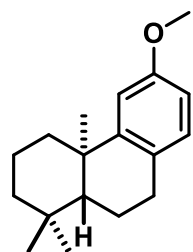

8d

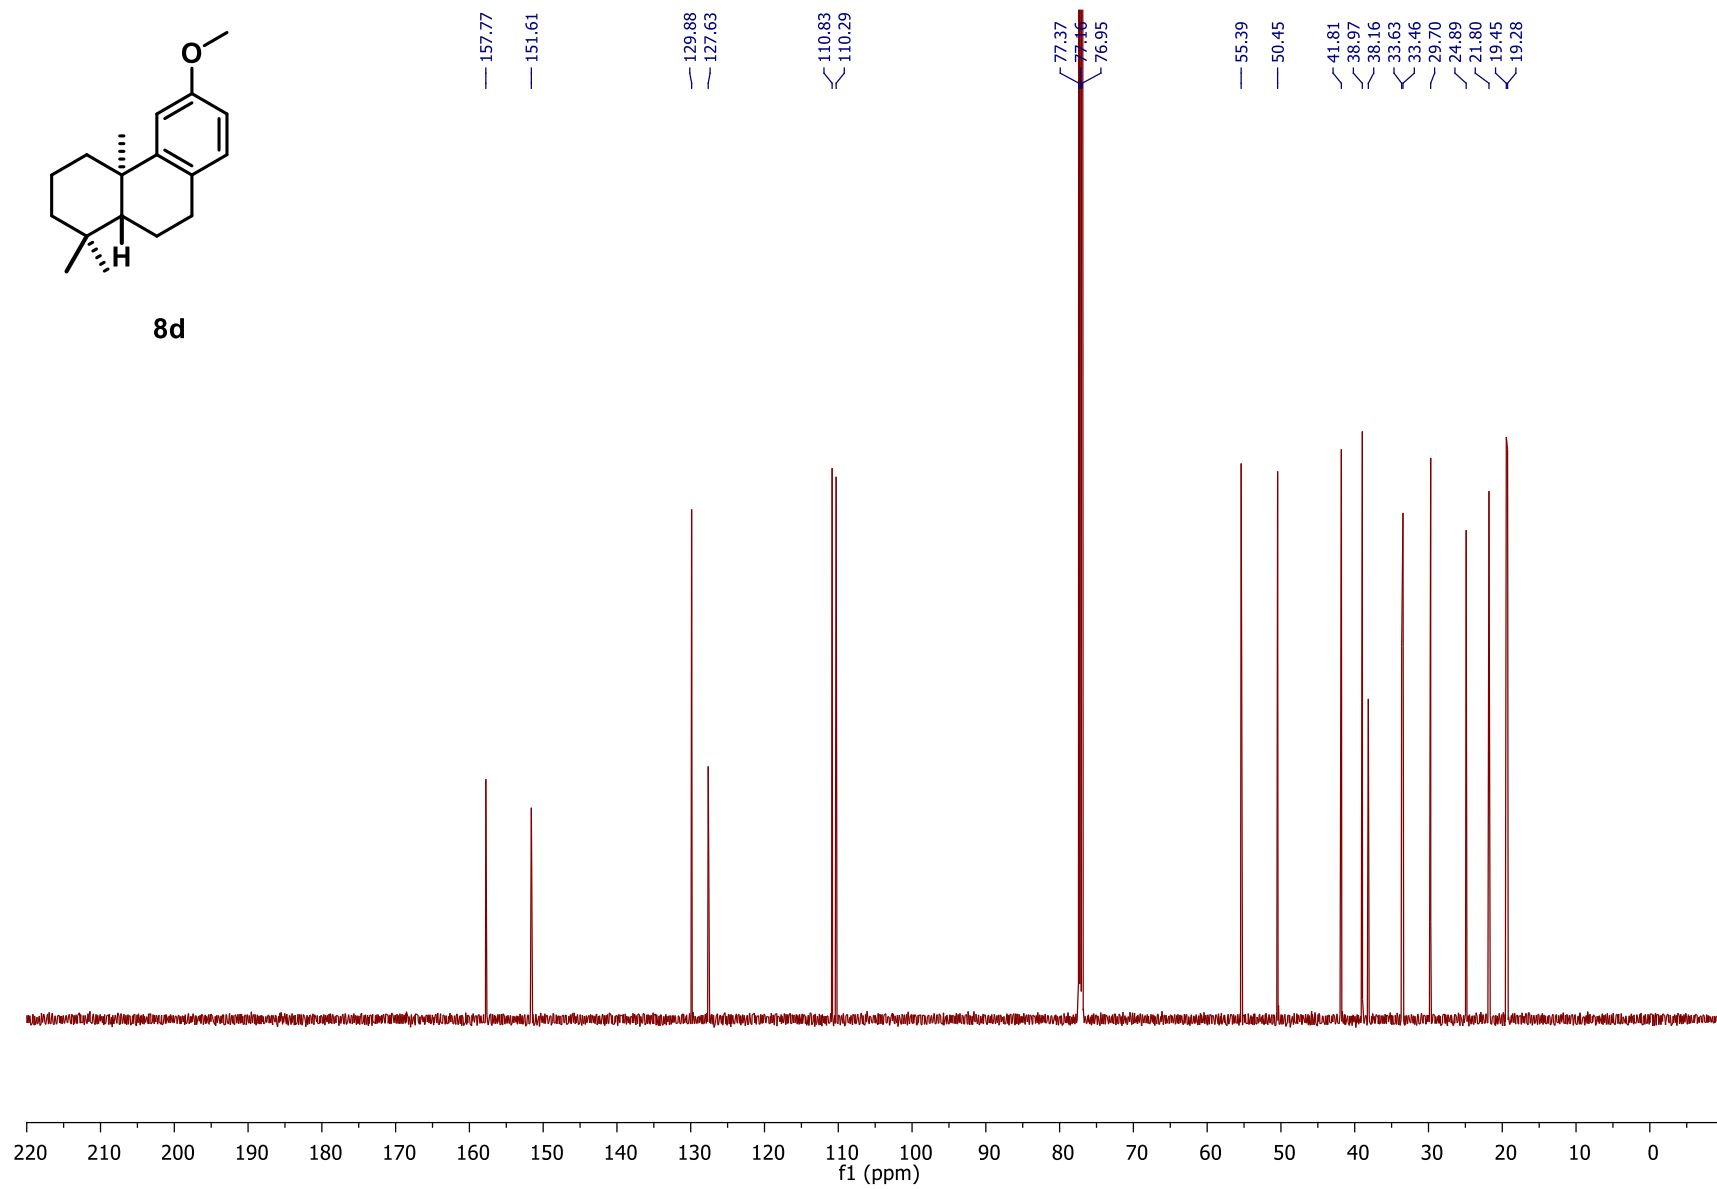

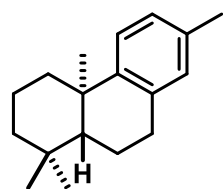

8c

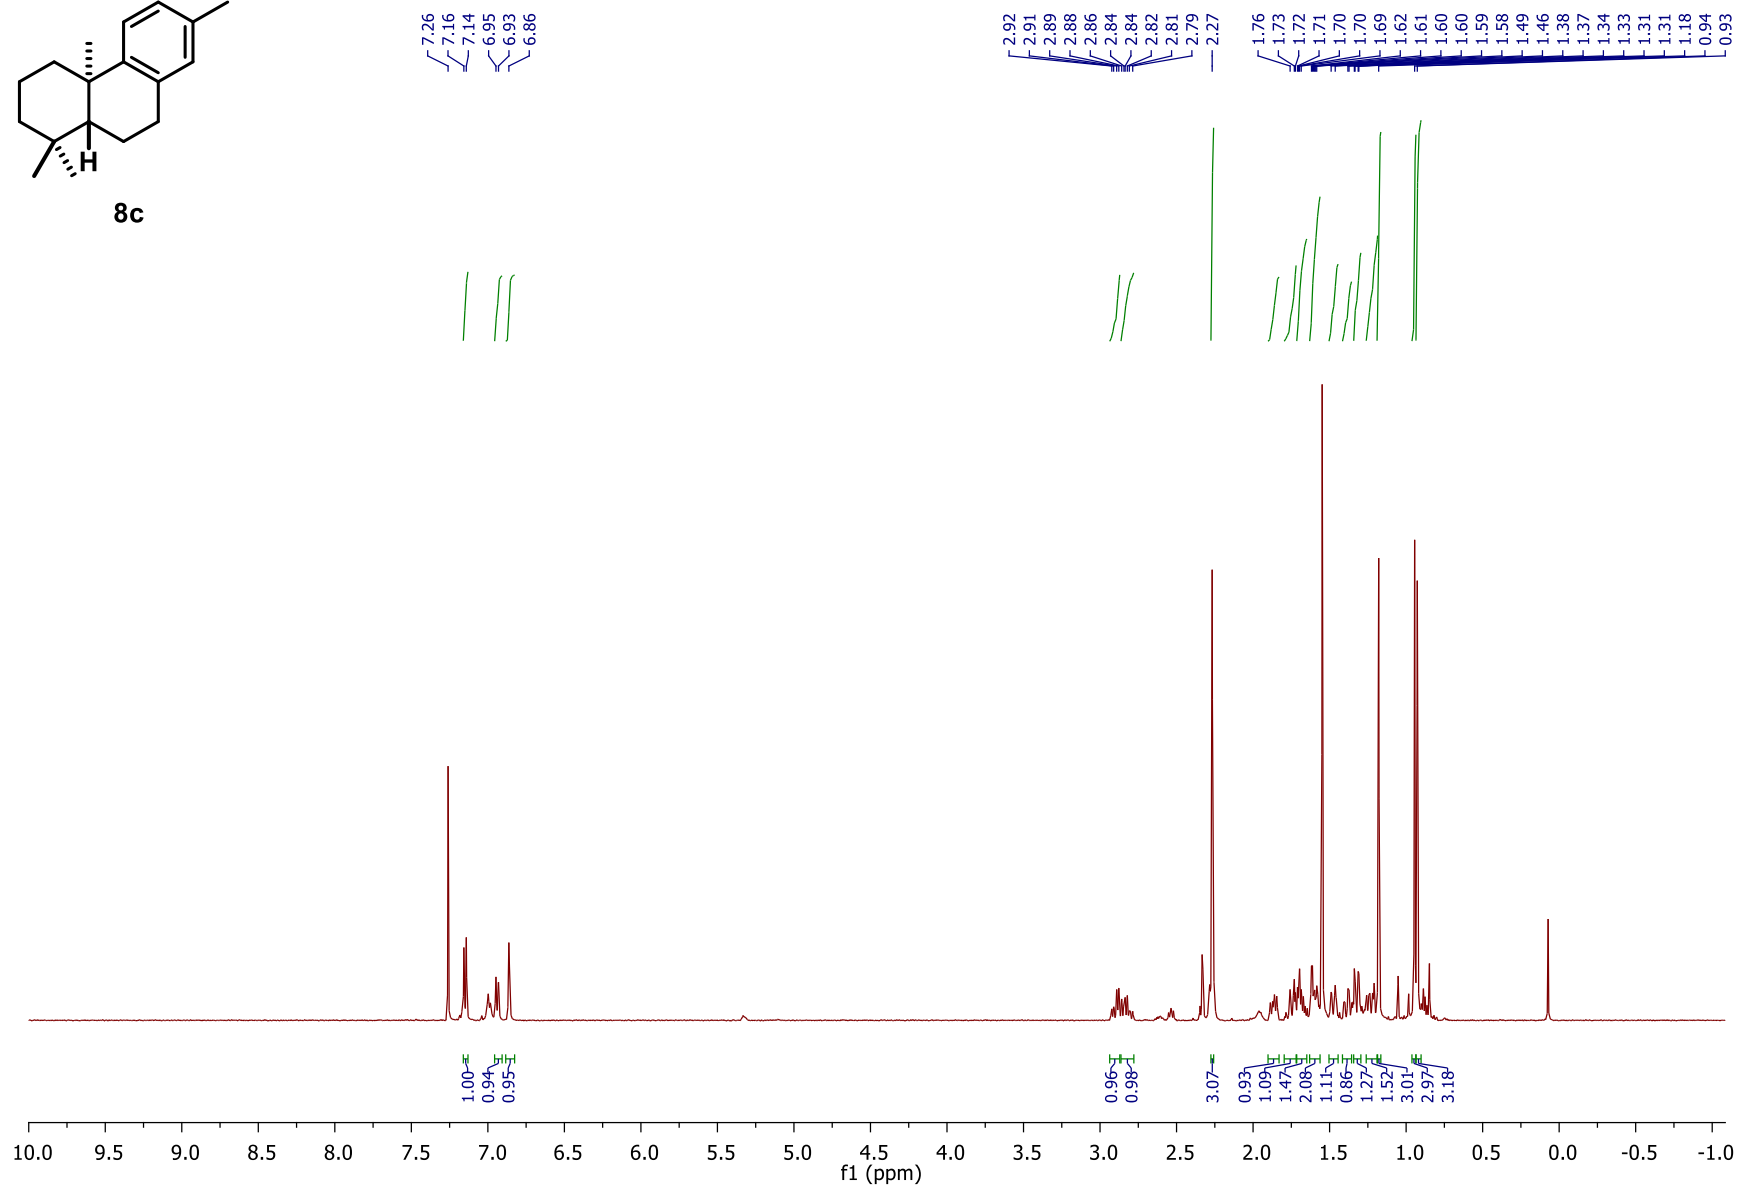

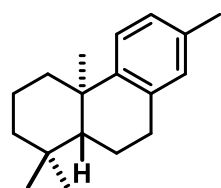

8c

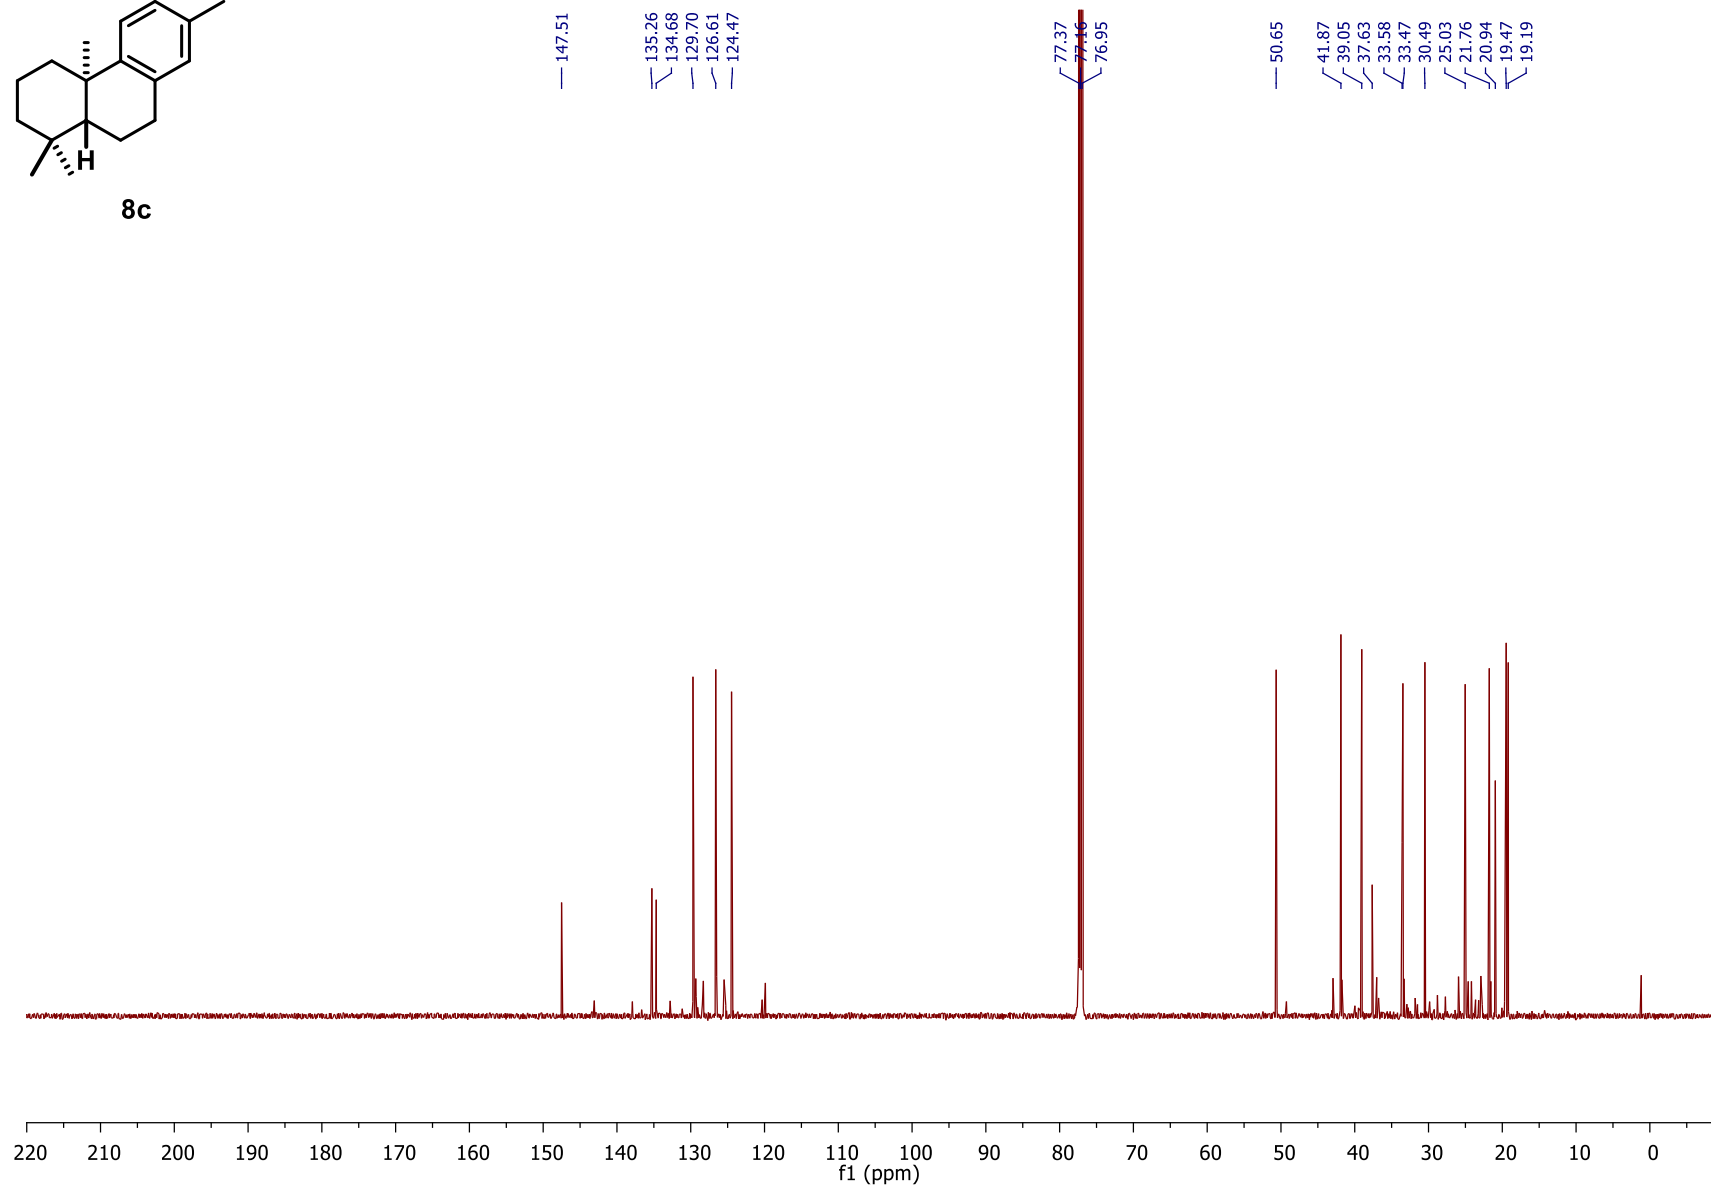



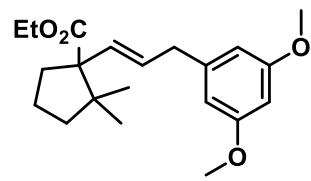

16

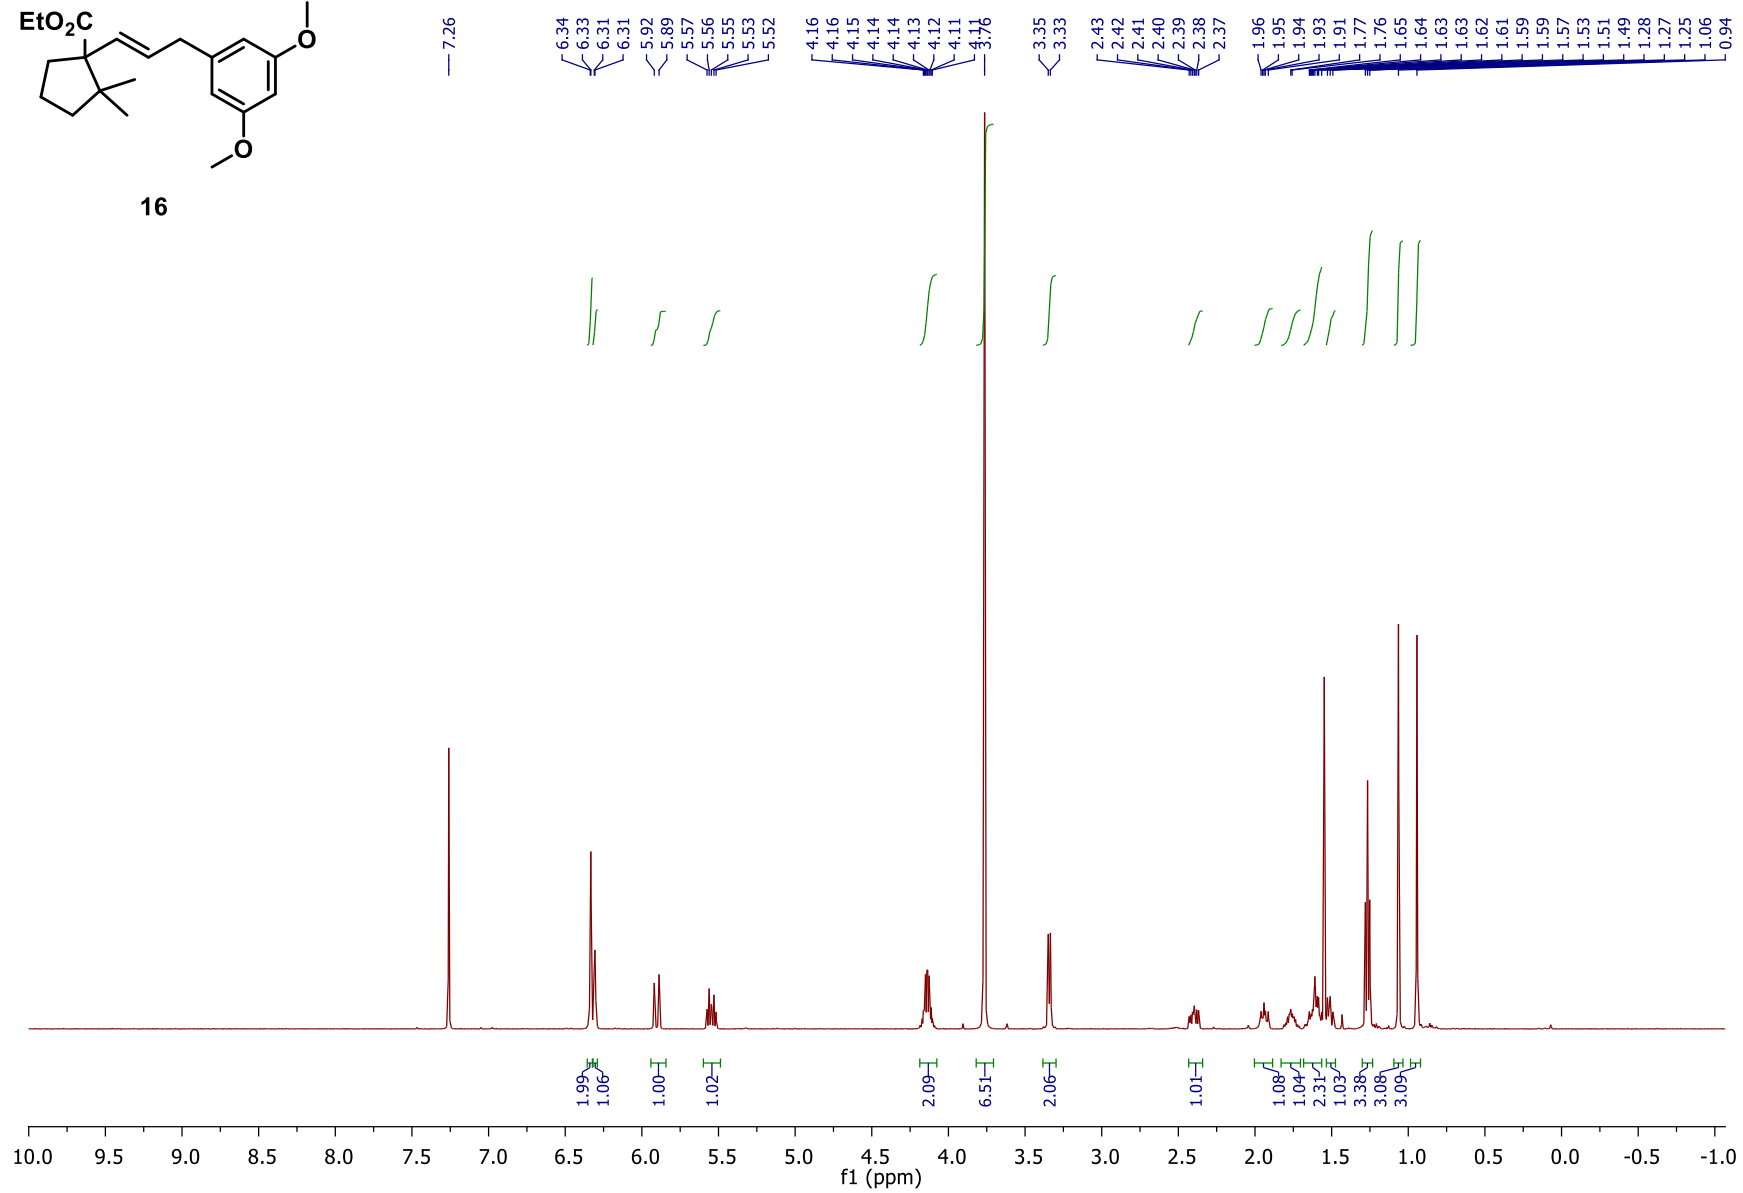

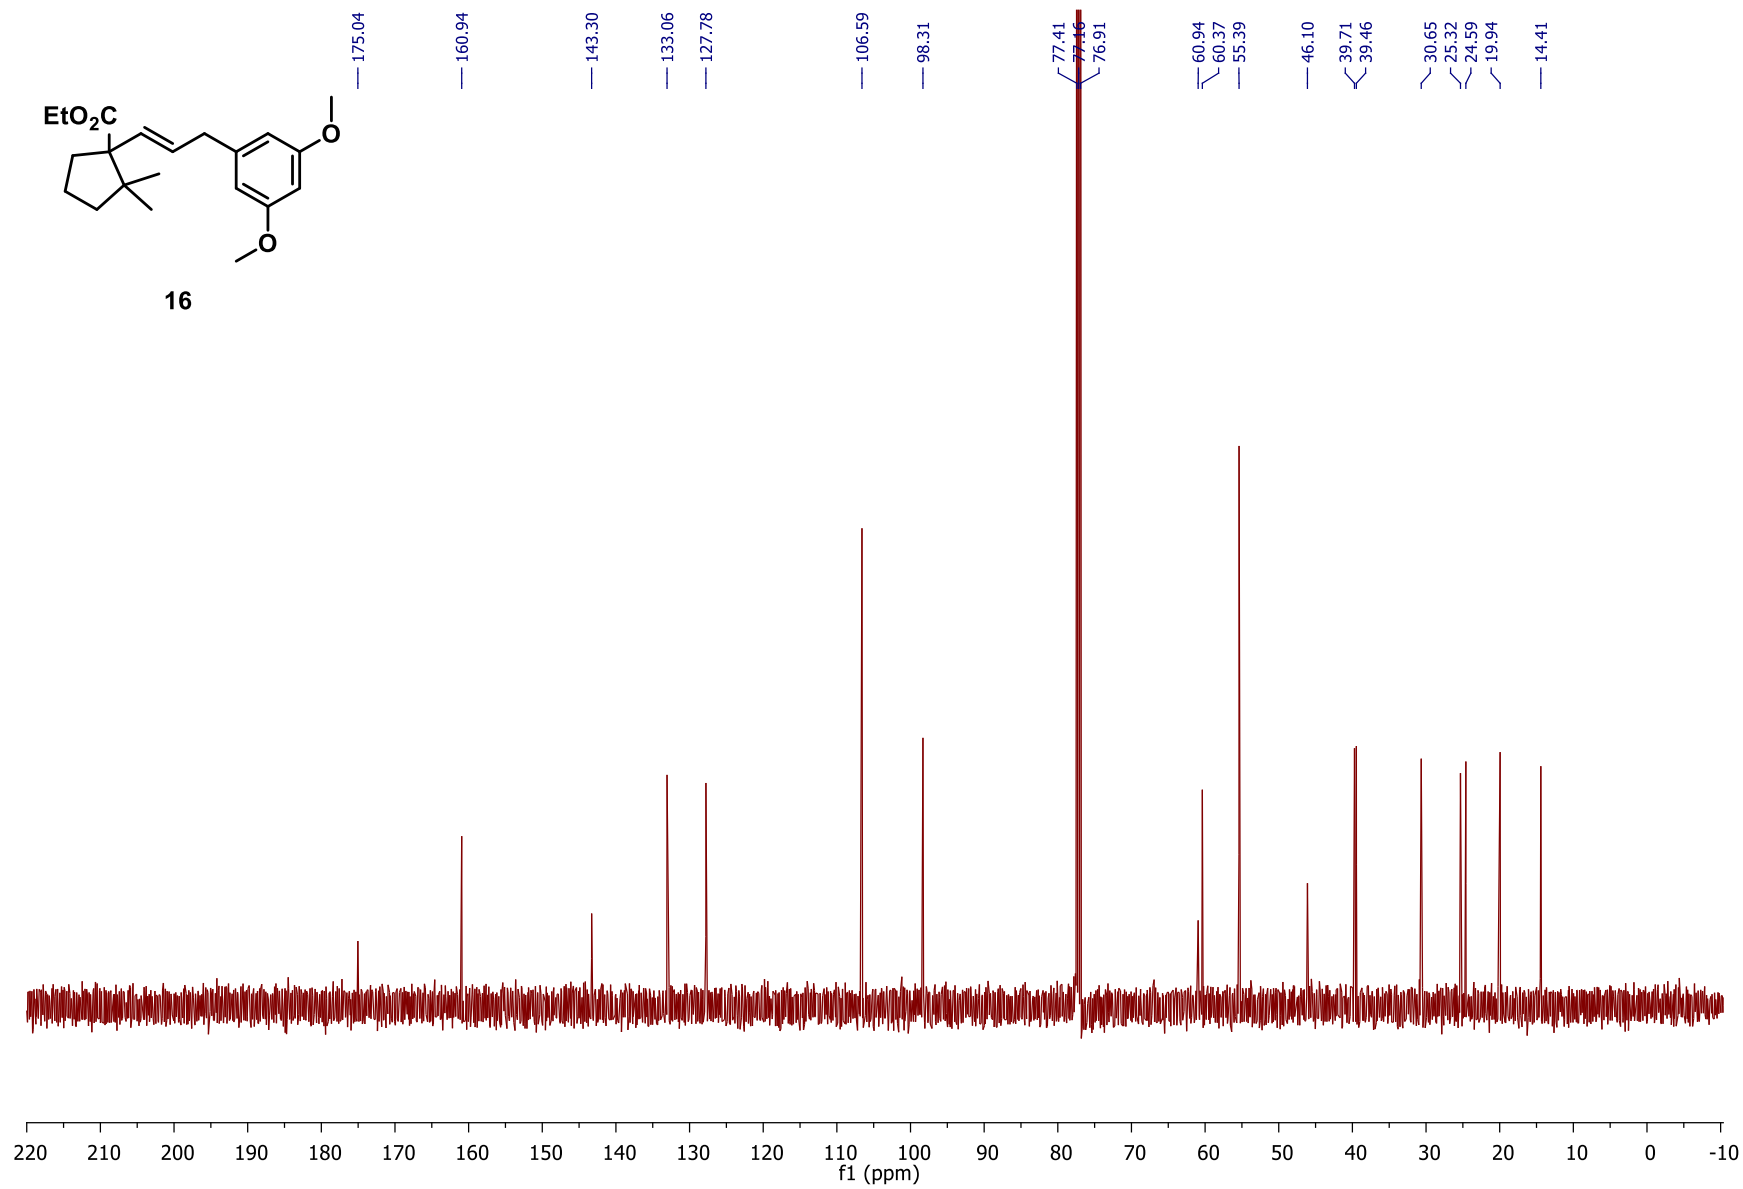

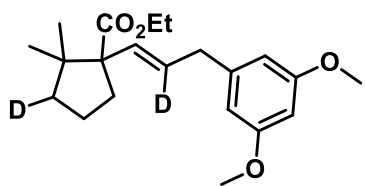

16-d<sub>2</sub> (~38% d<sub>2</sub>)

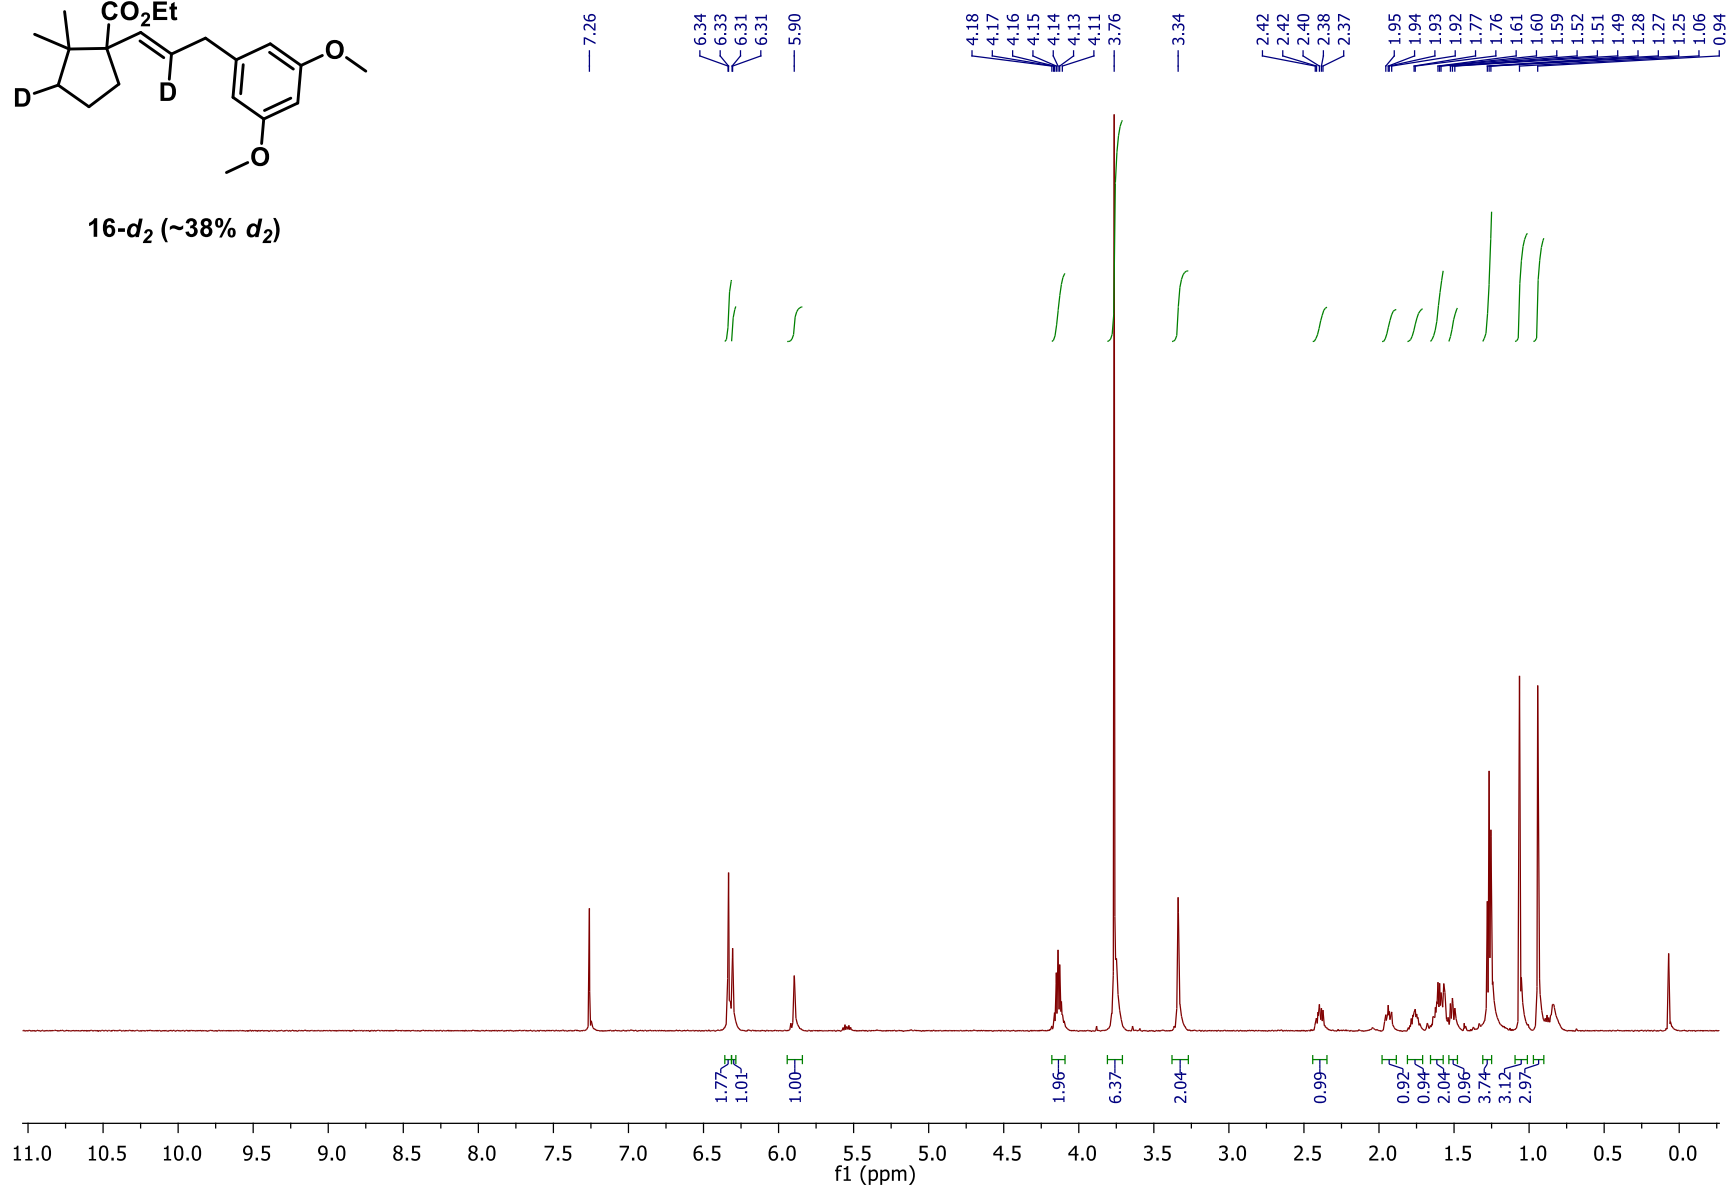

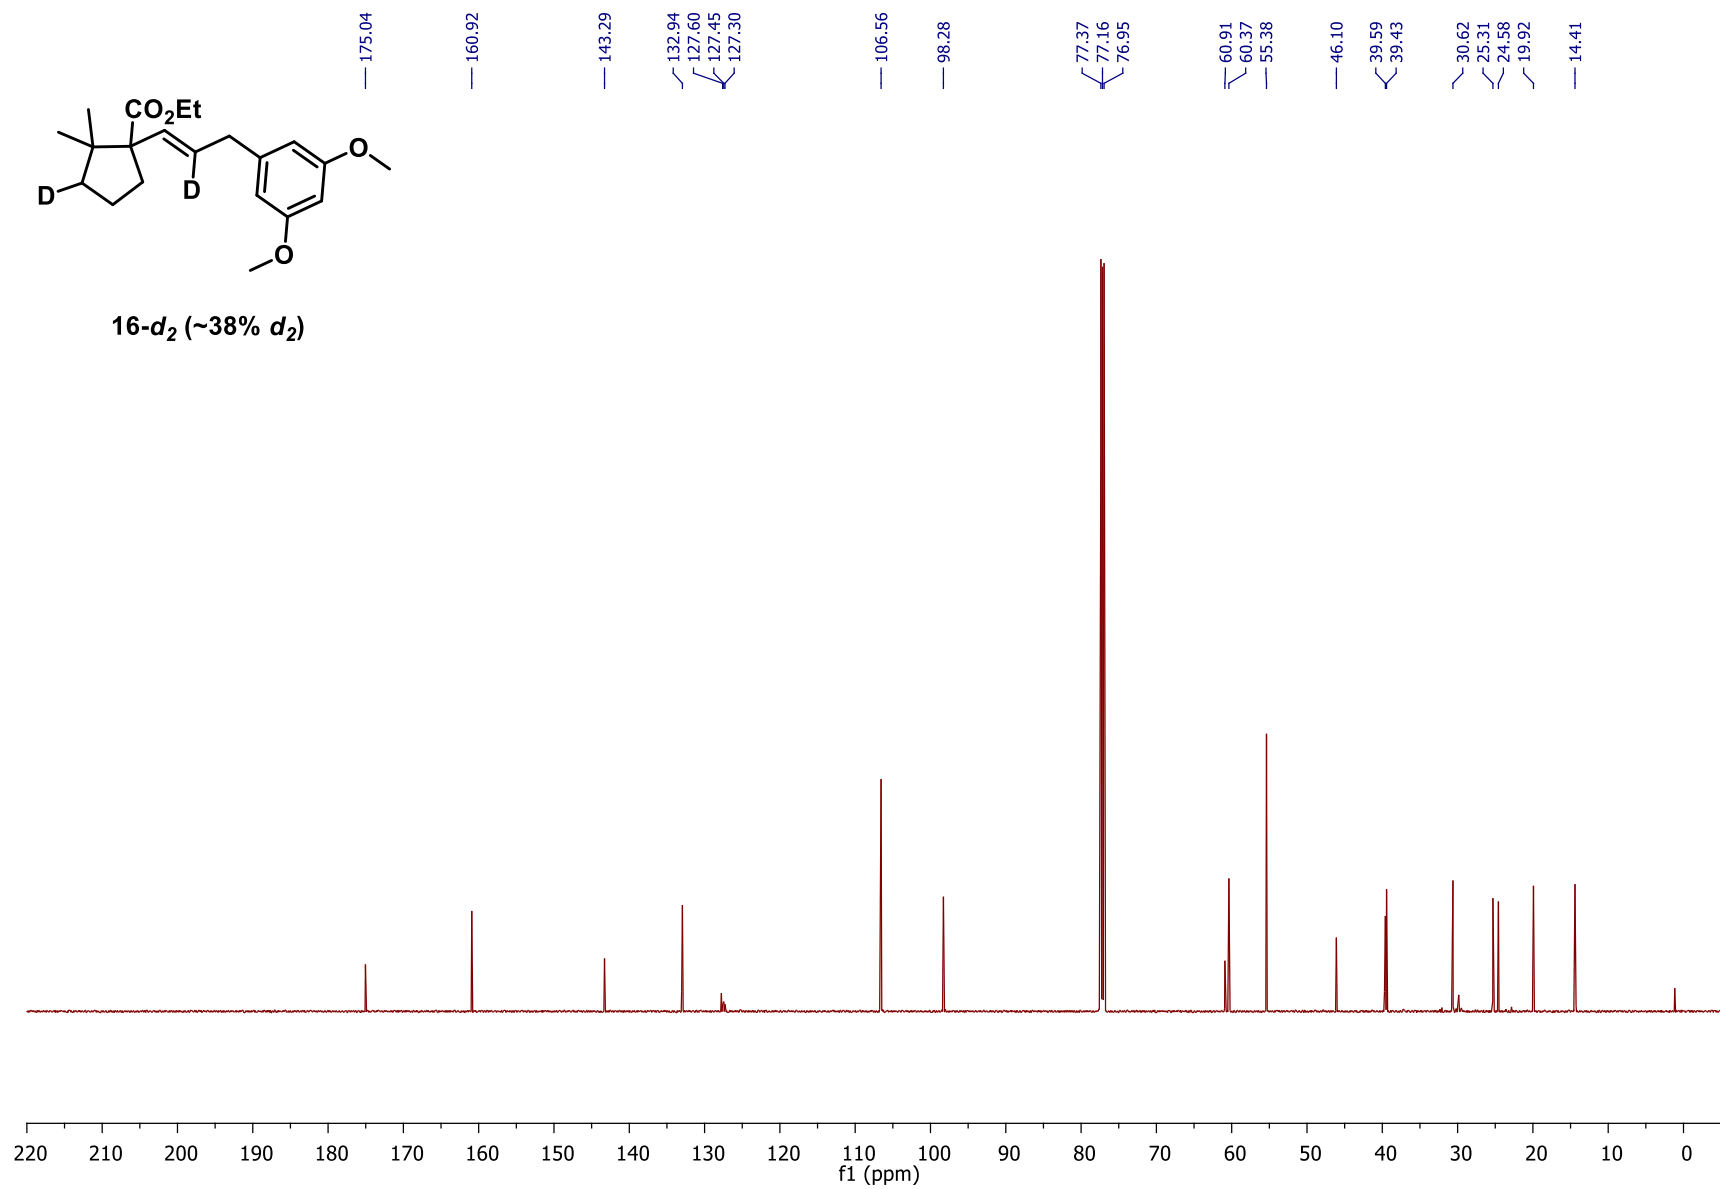

DV\_4\_051\_b 22 (0.404)

TOF MS ES+  
767

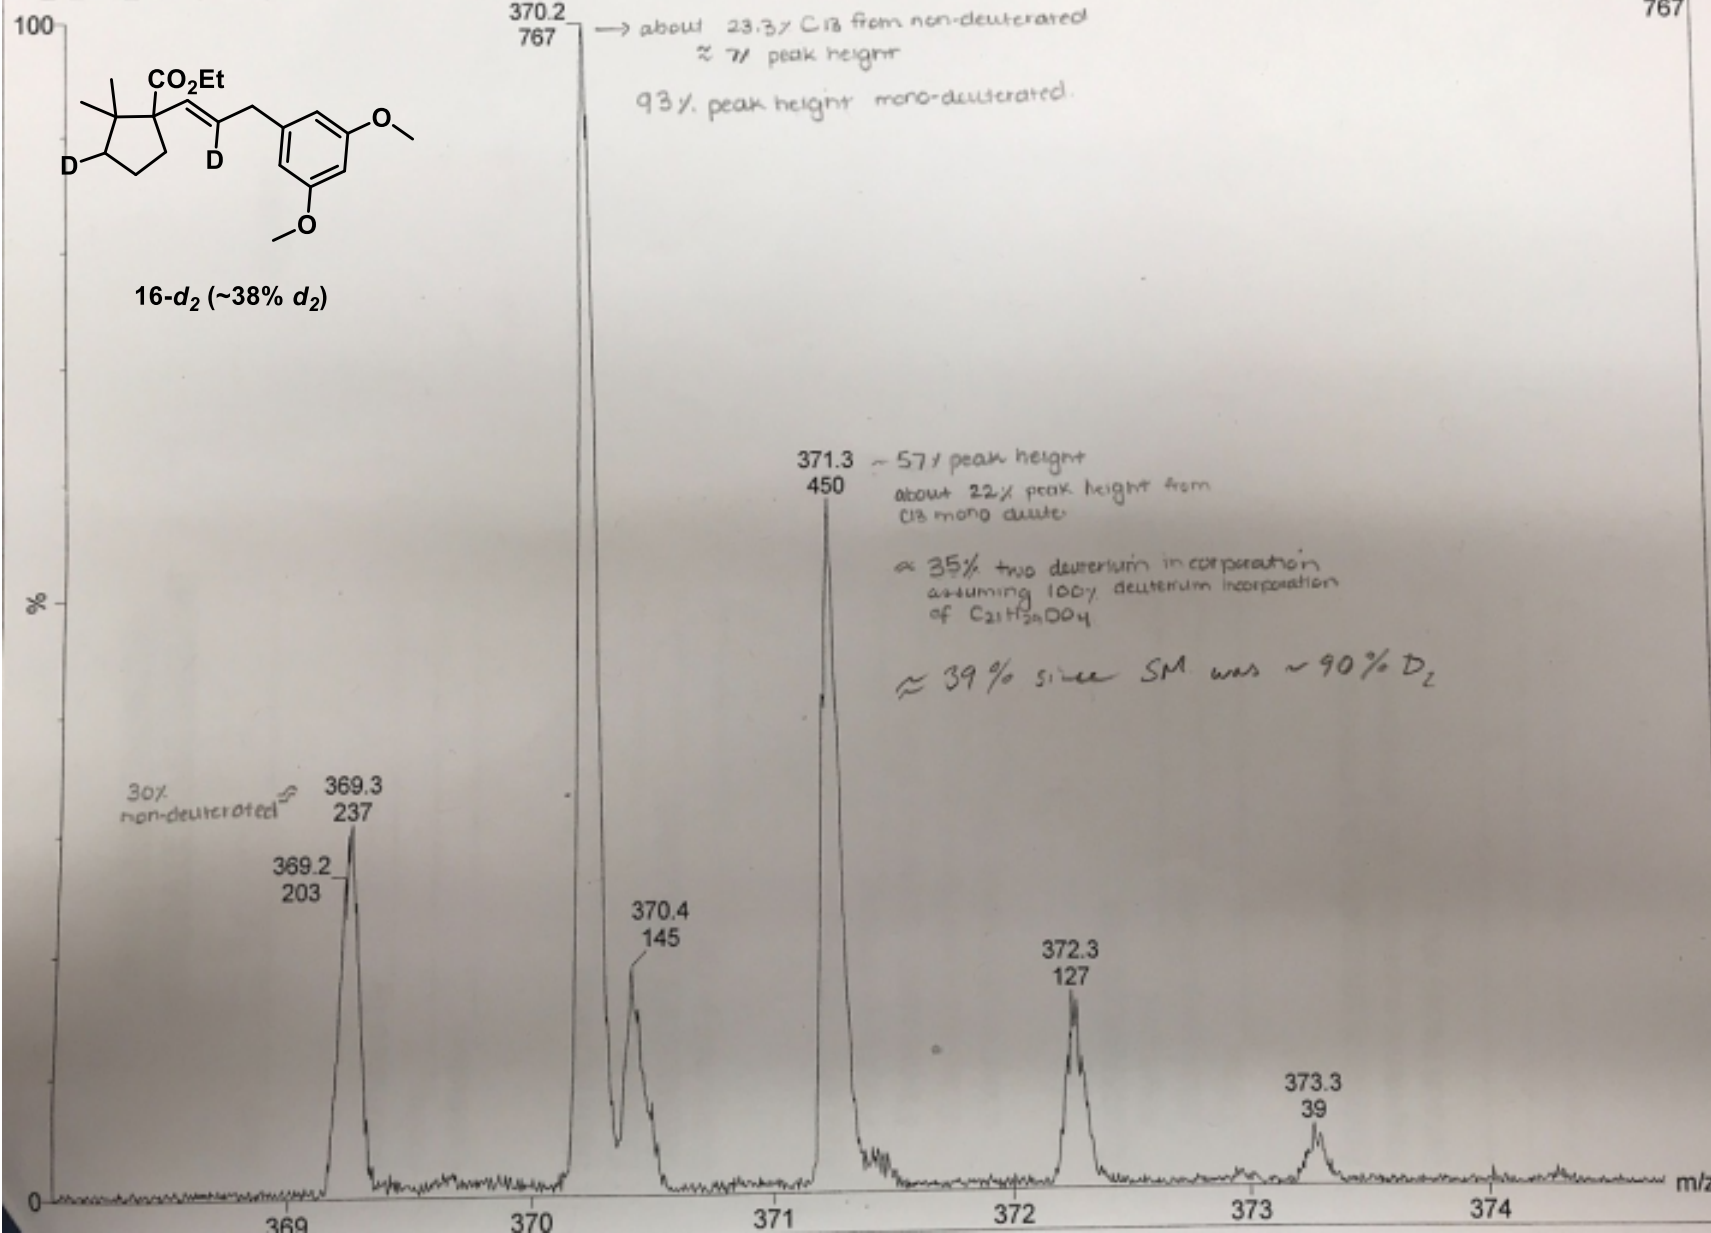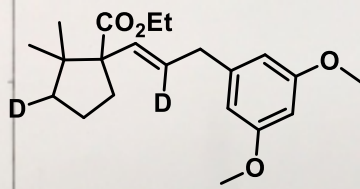

16-d<sub>2</sub> (~38% d<sub>2</sub>)

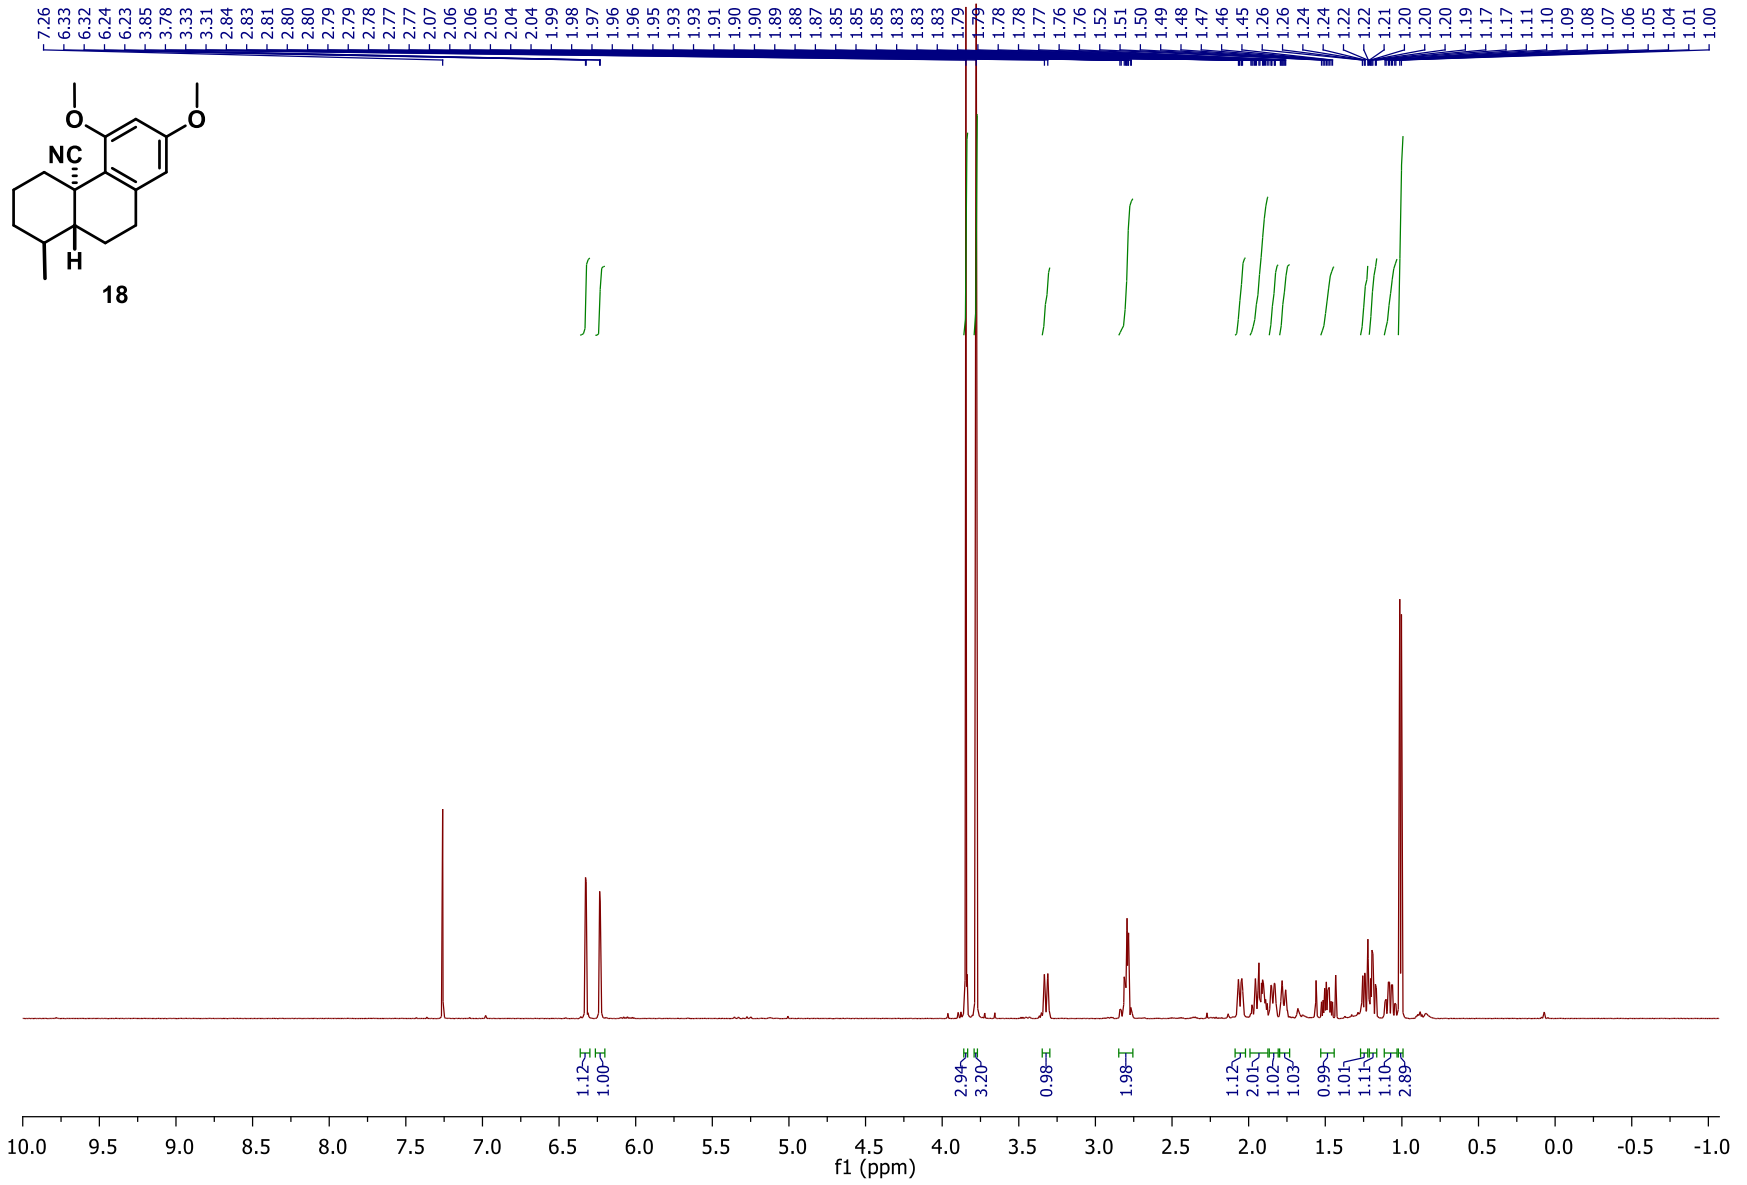

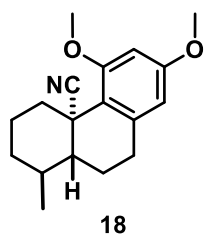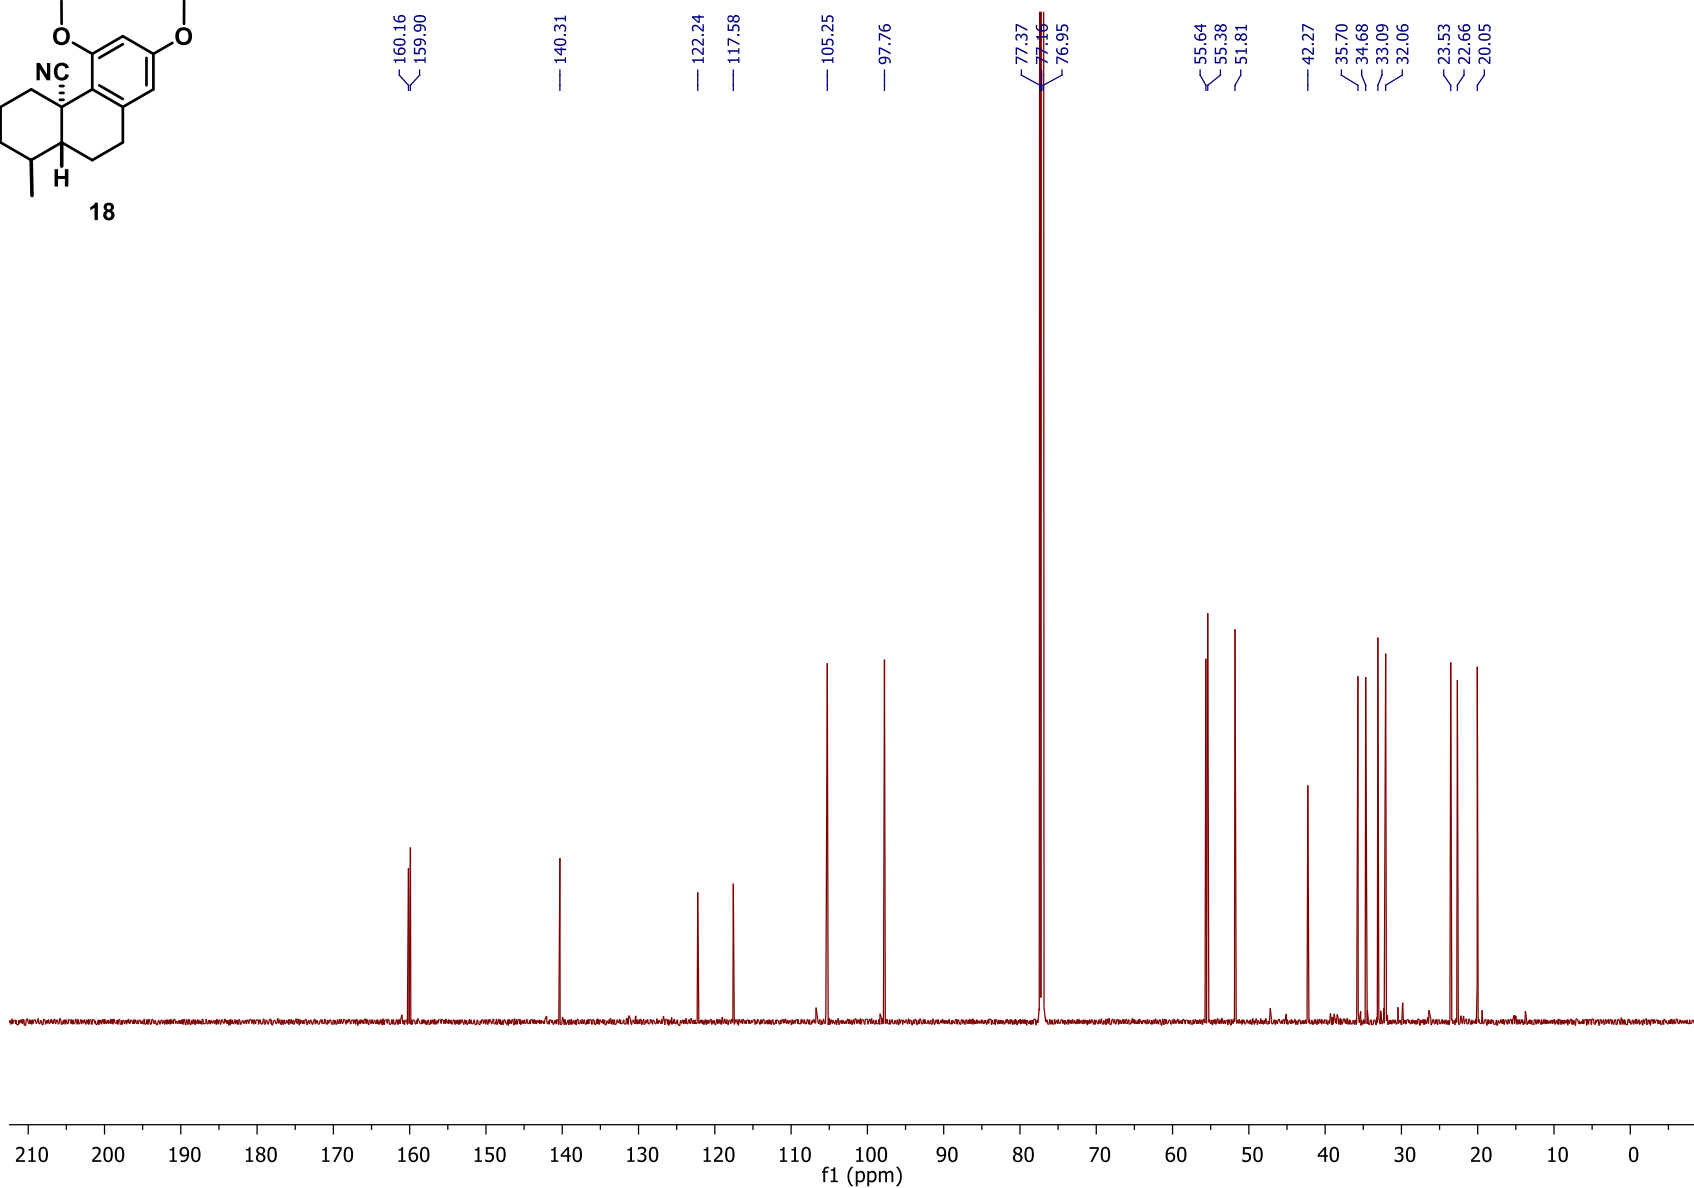

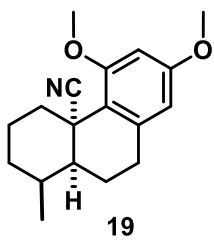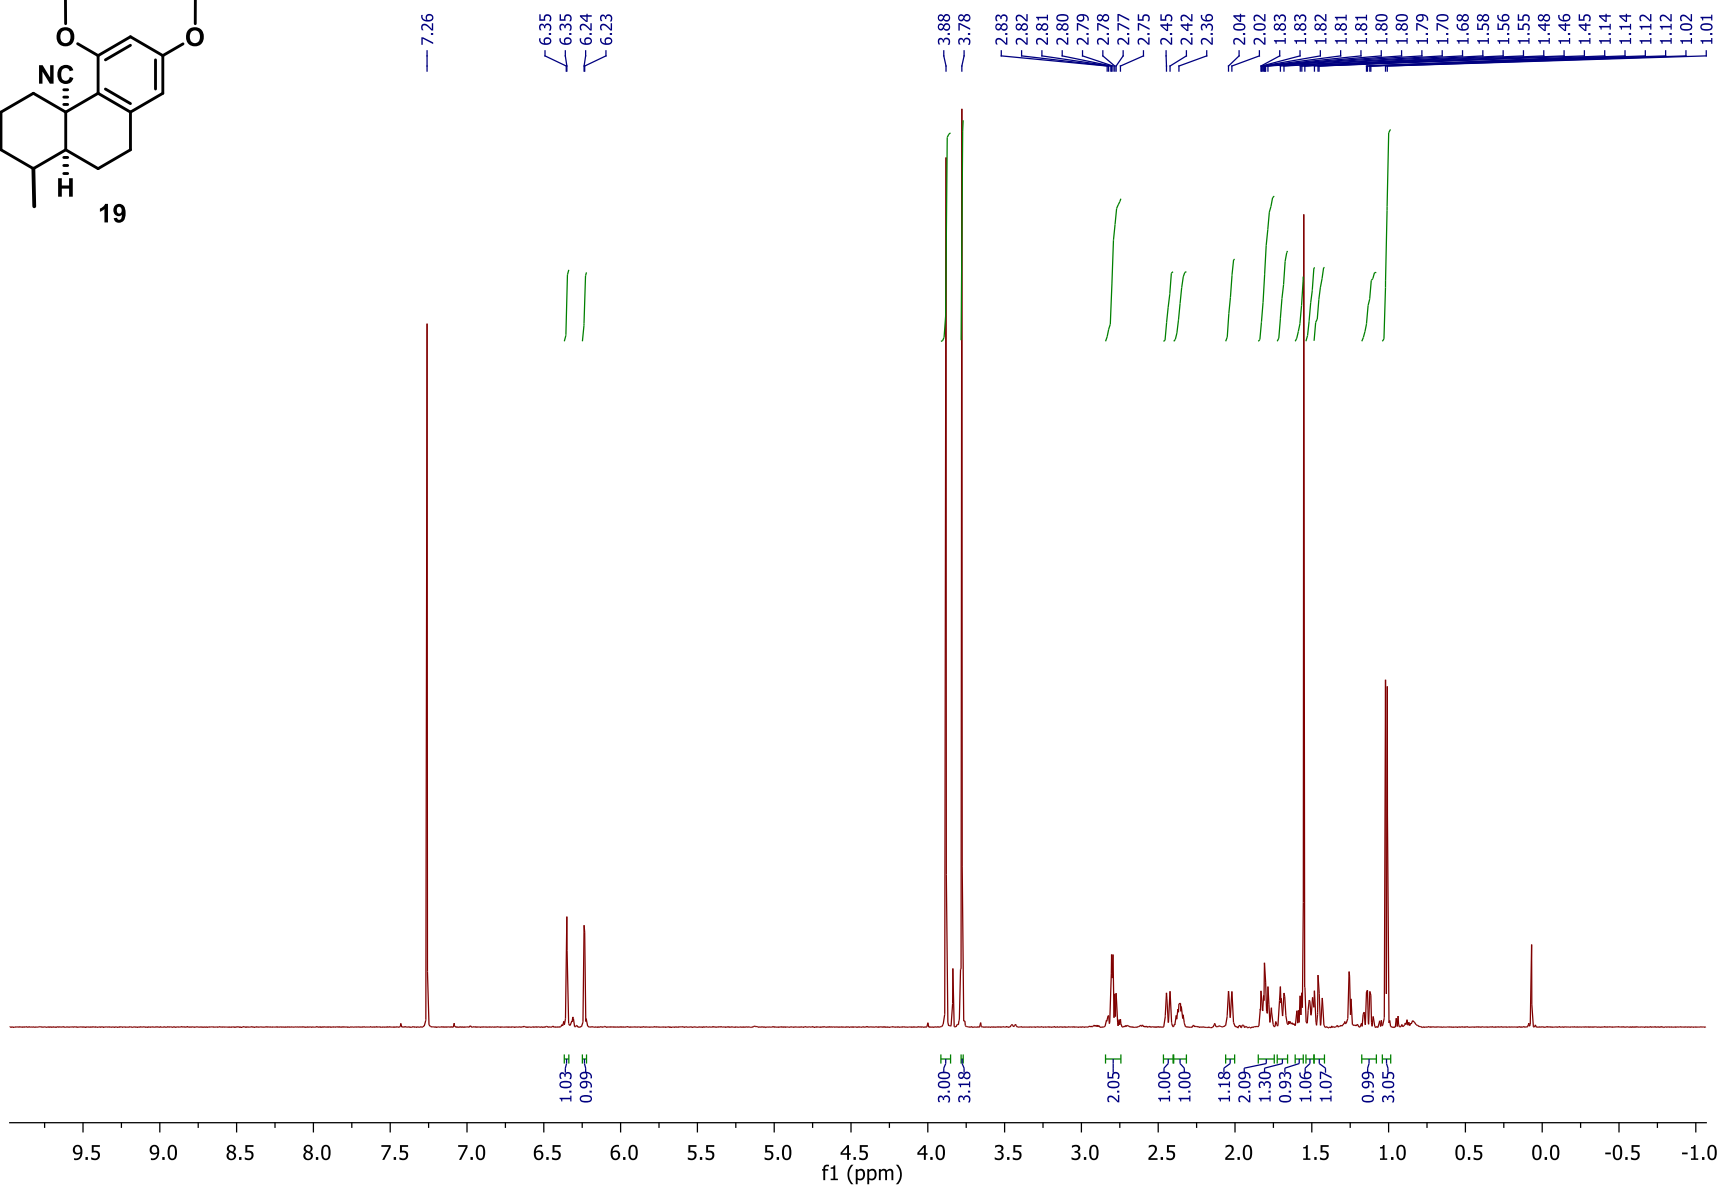



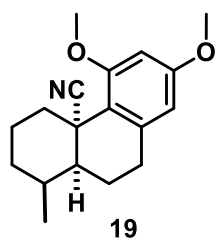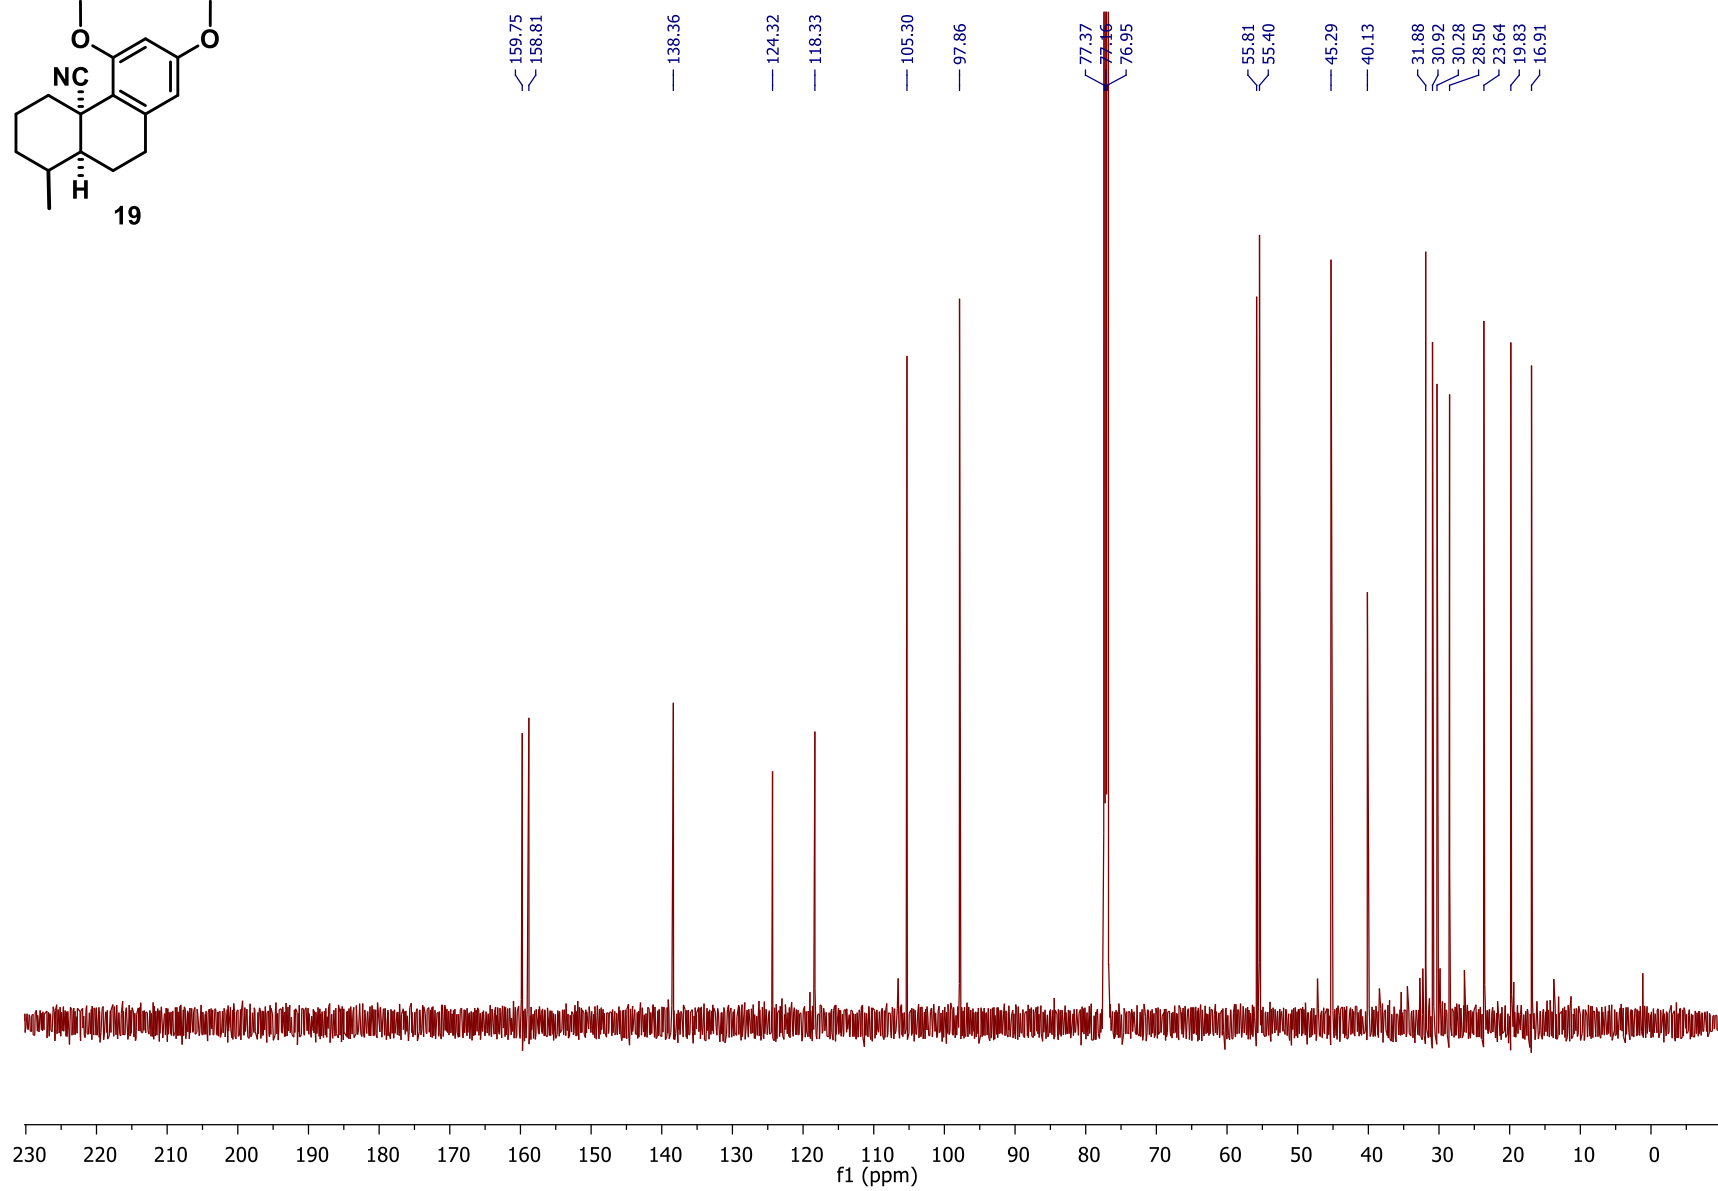

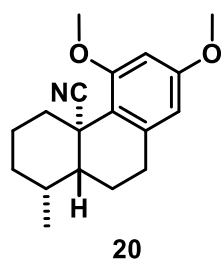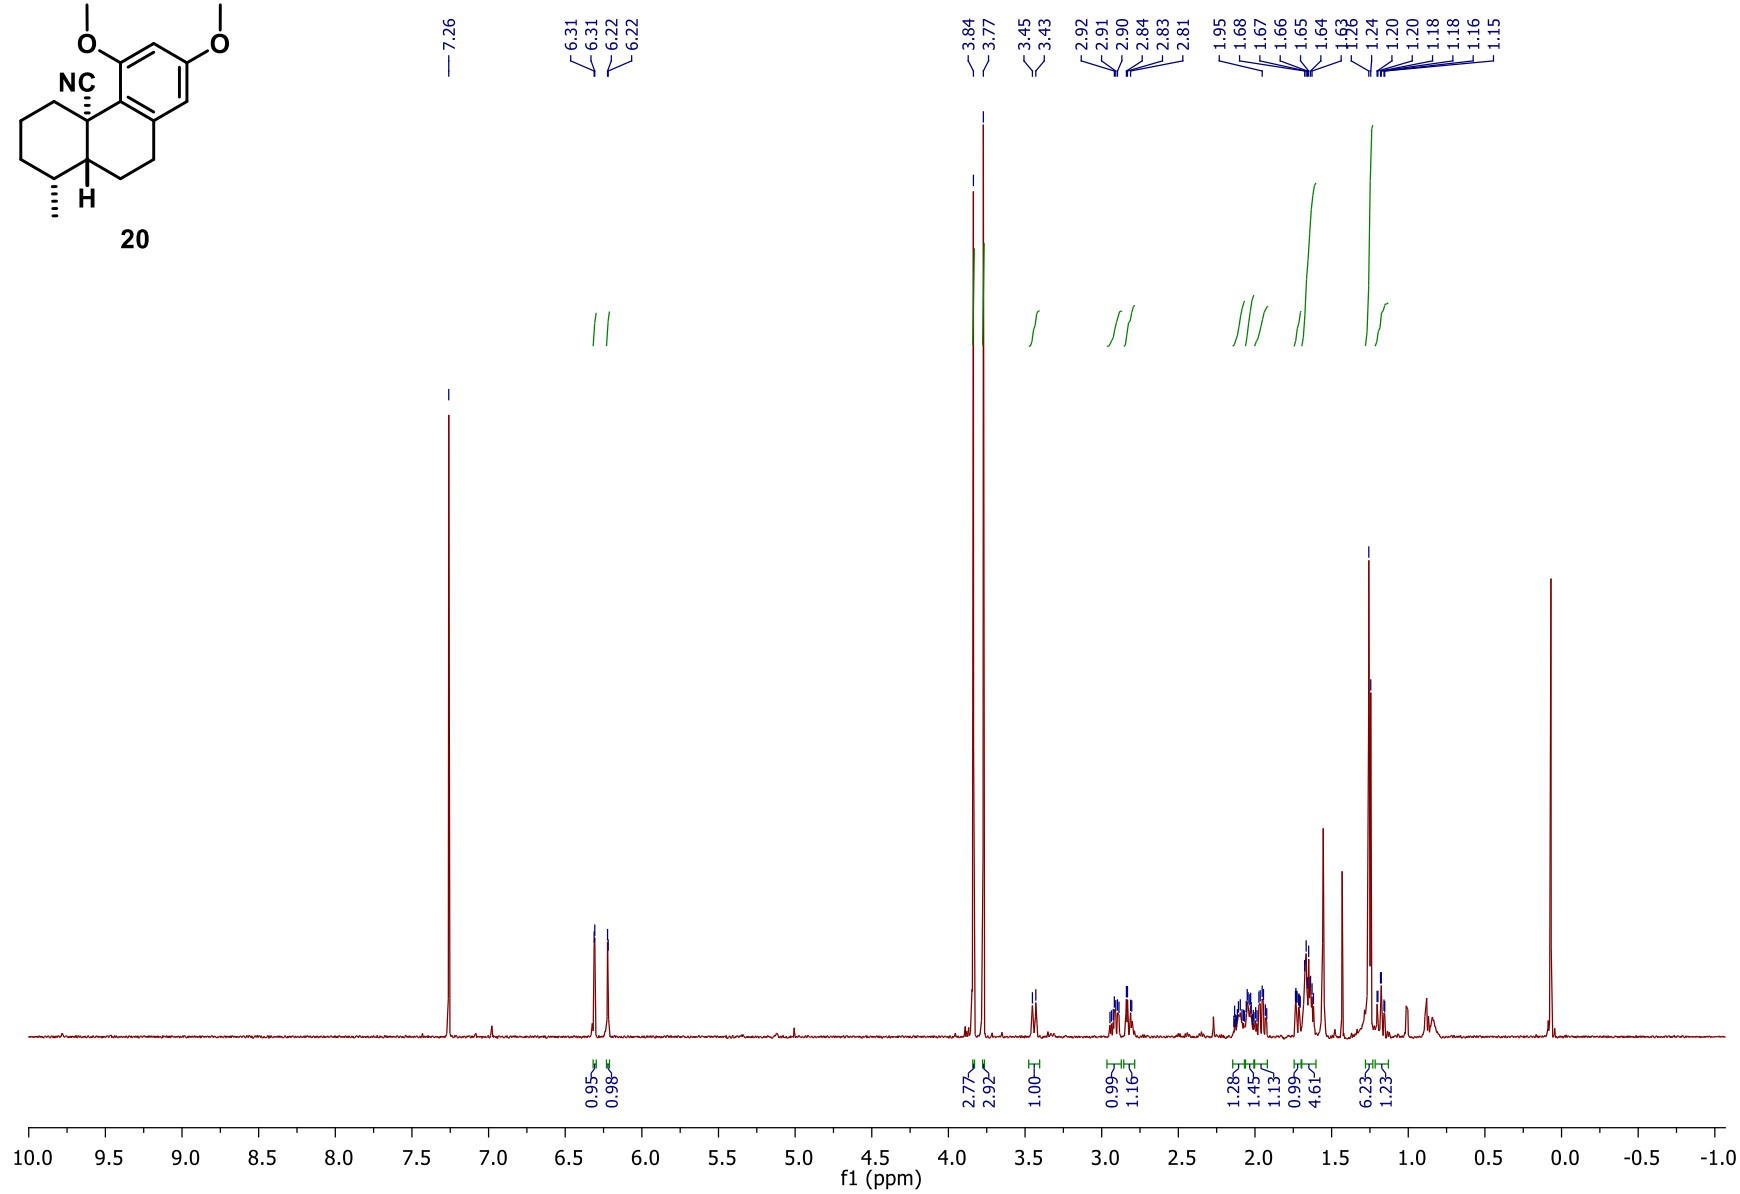

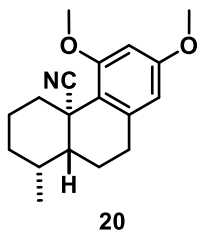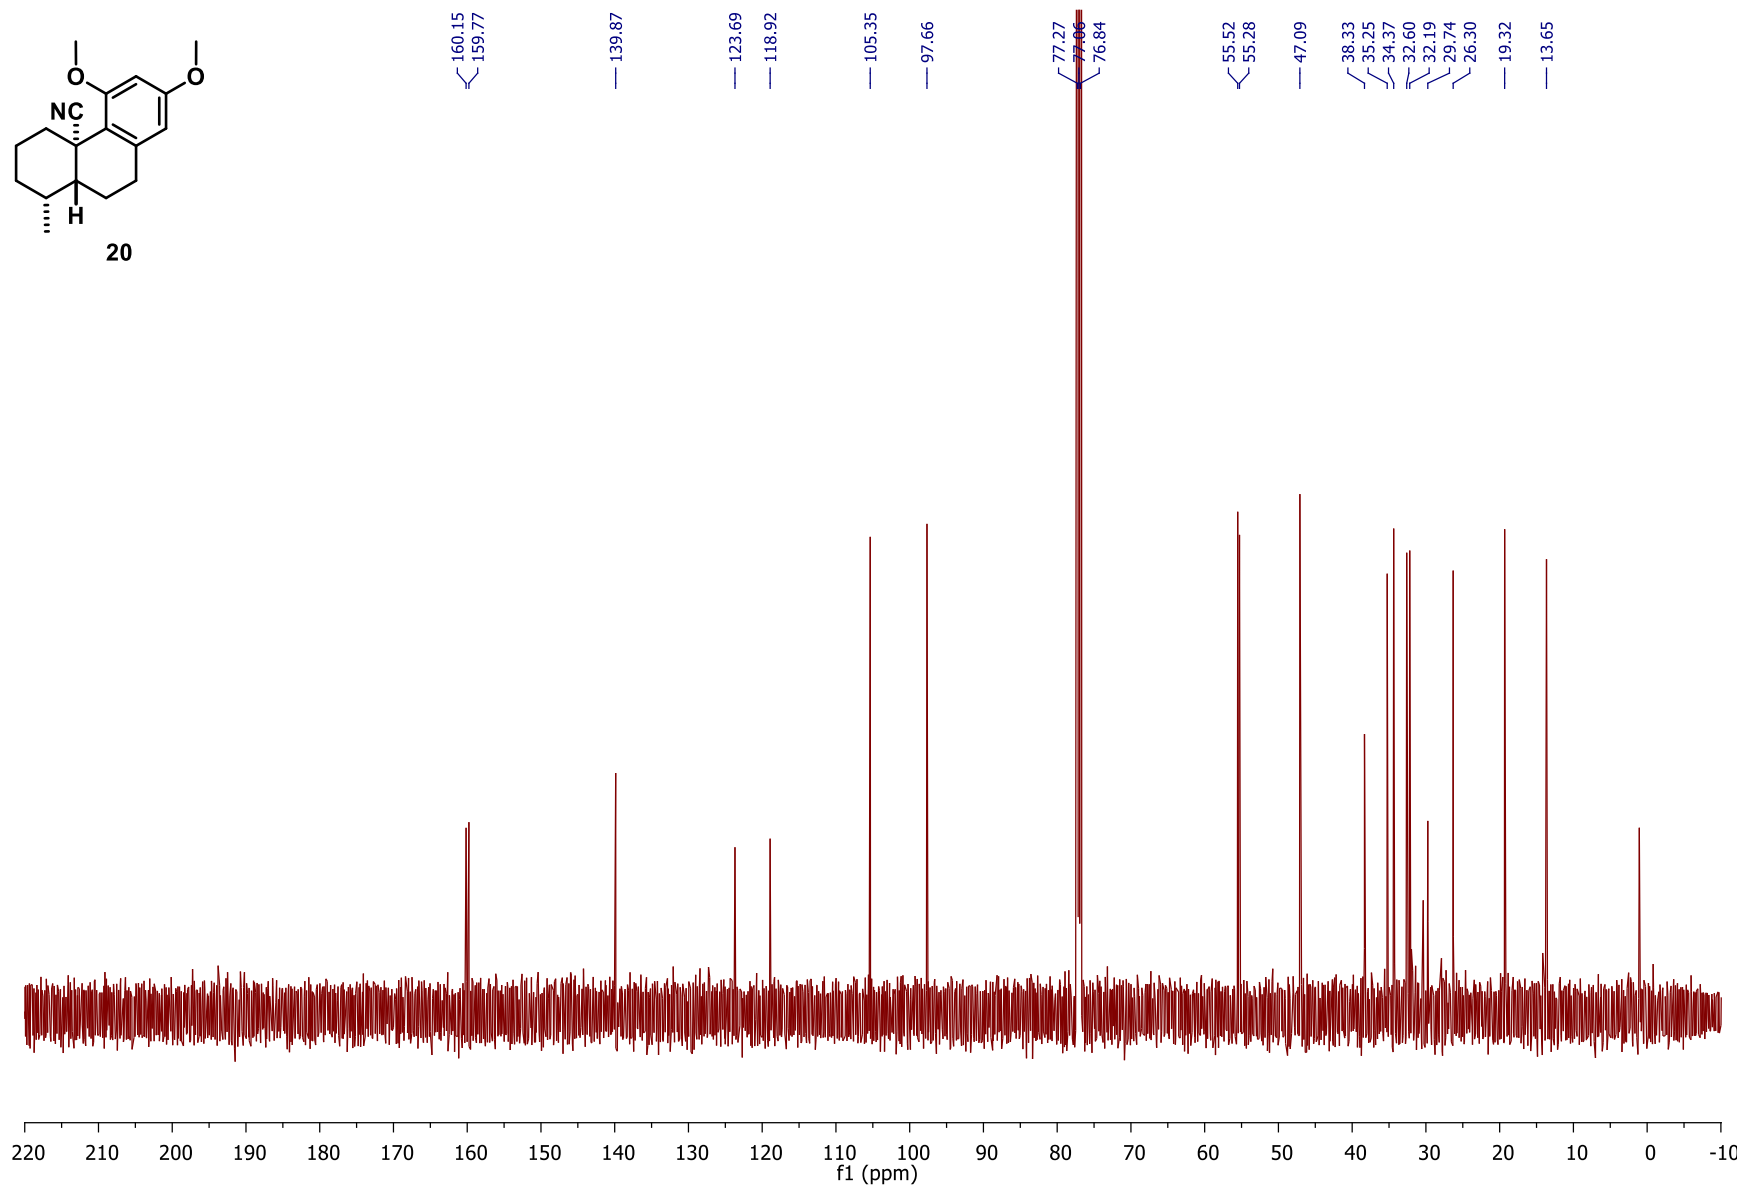

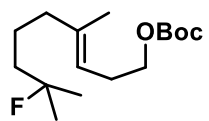

24

(contains ~30% of regioisomeric impurities)

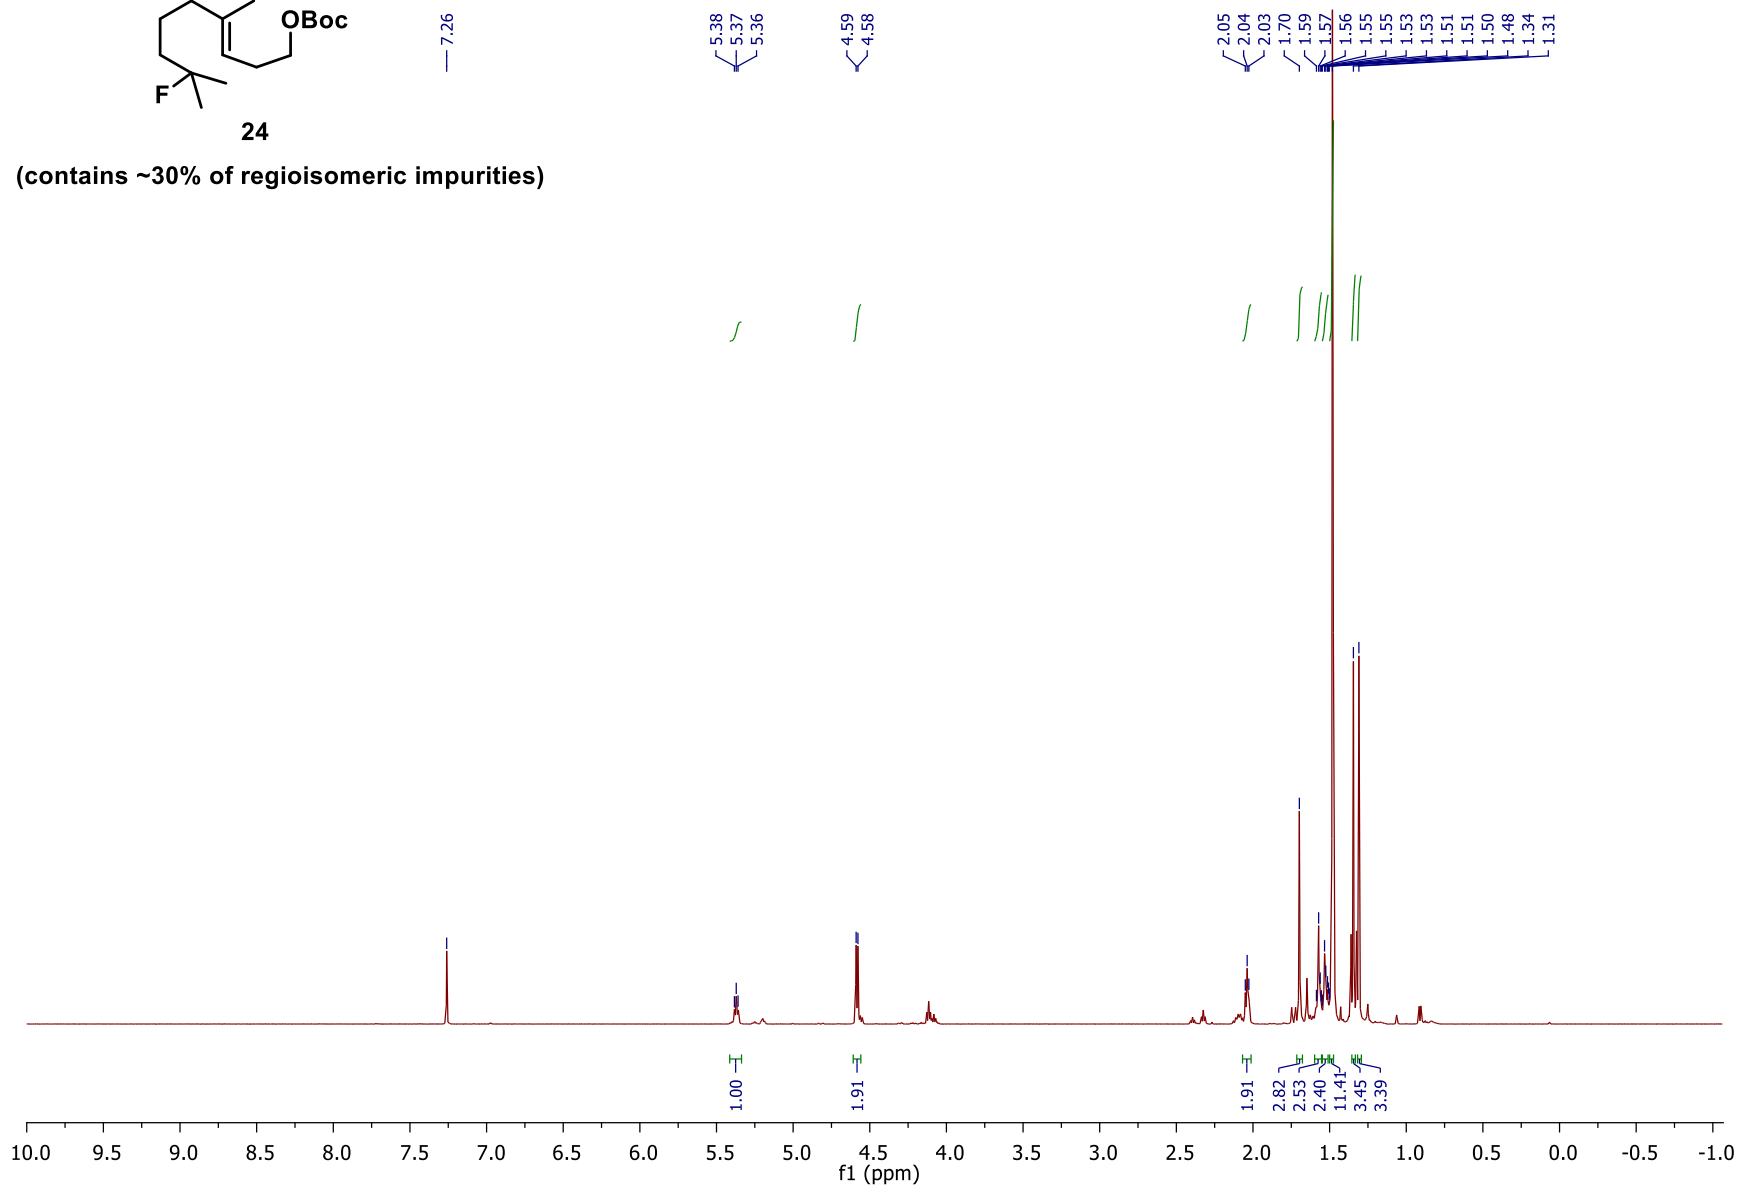

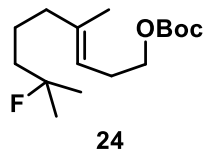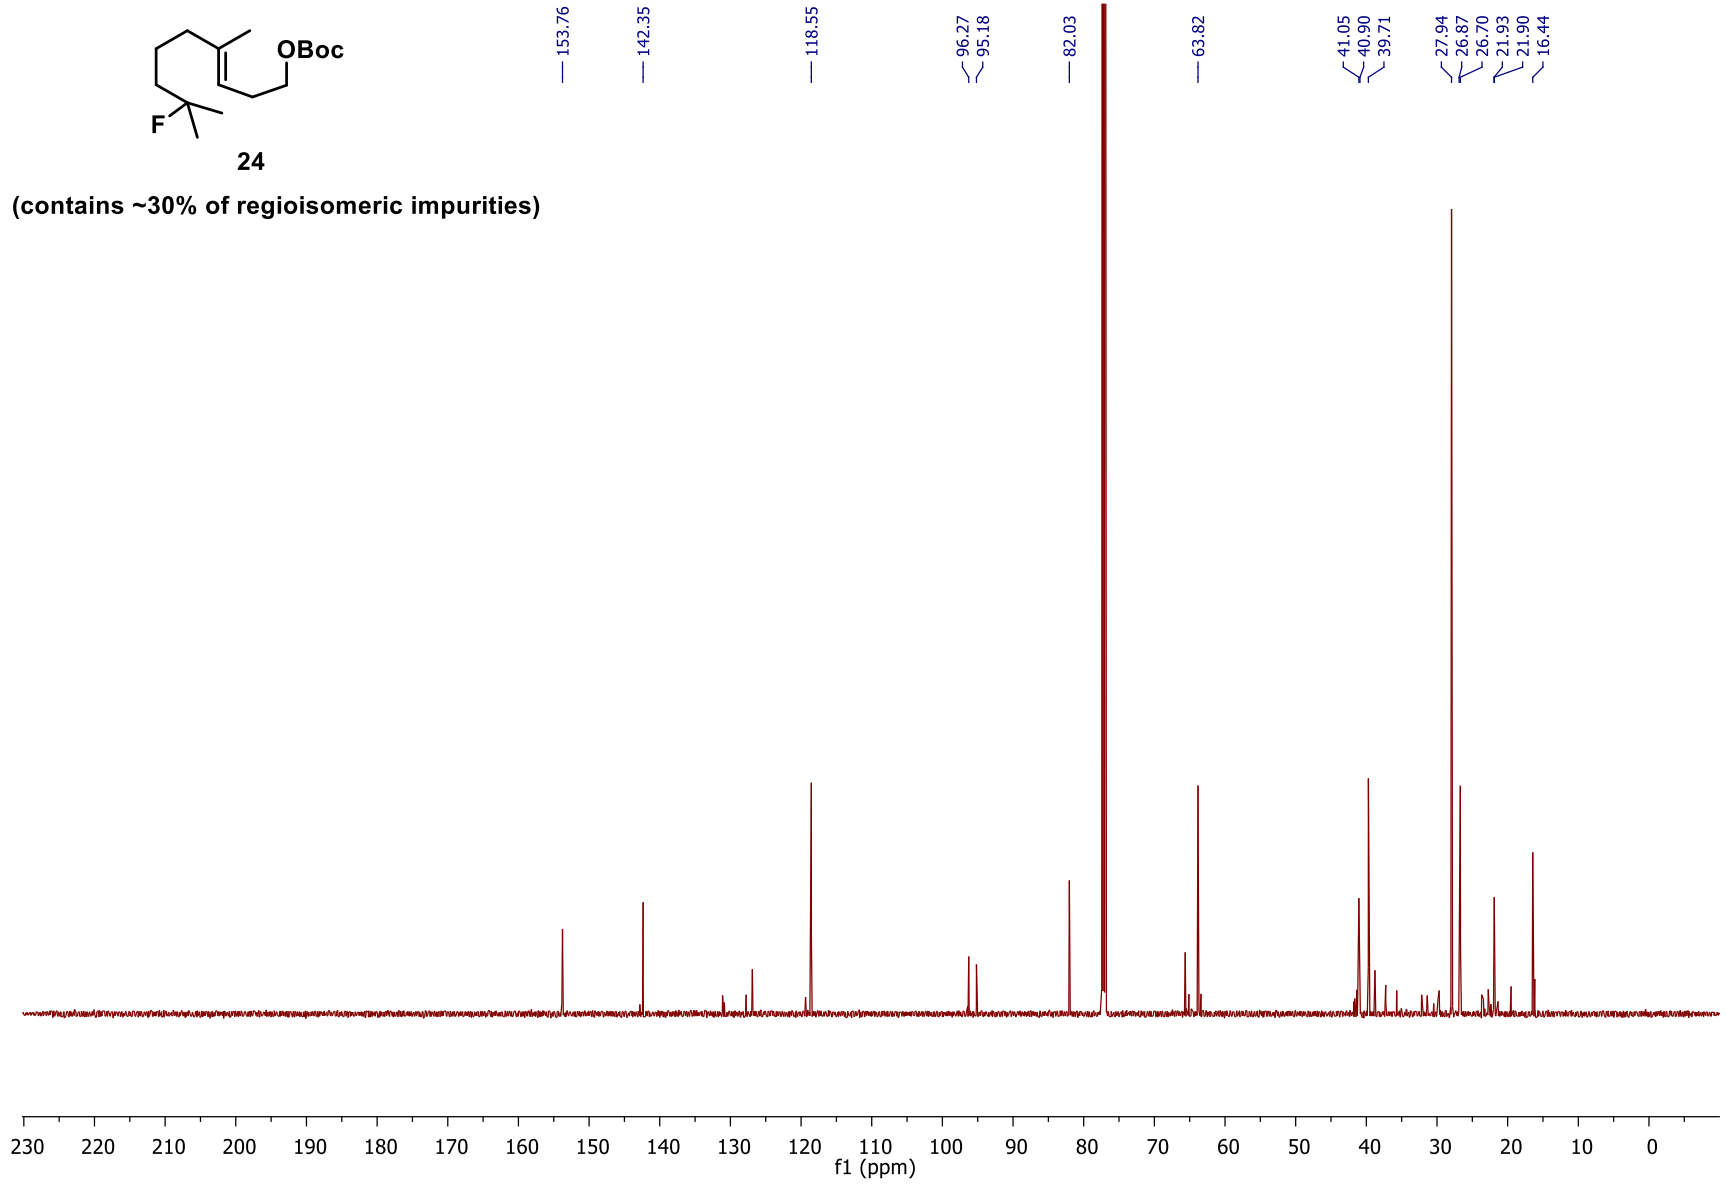

(contains ~30% of regioisomeric impurities)

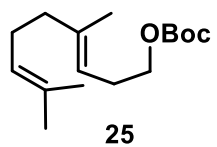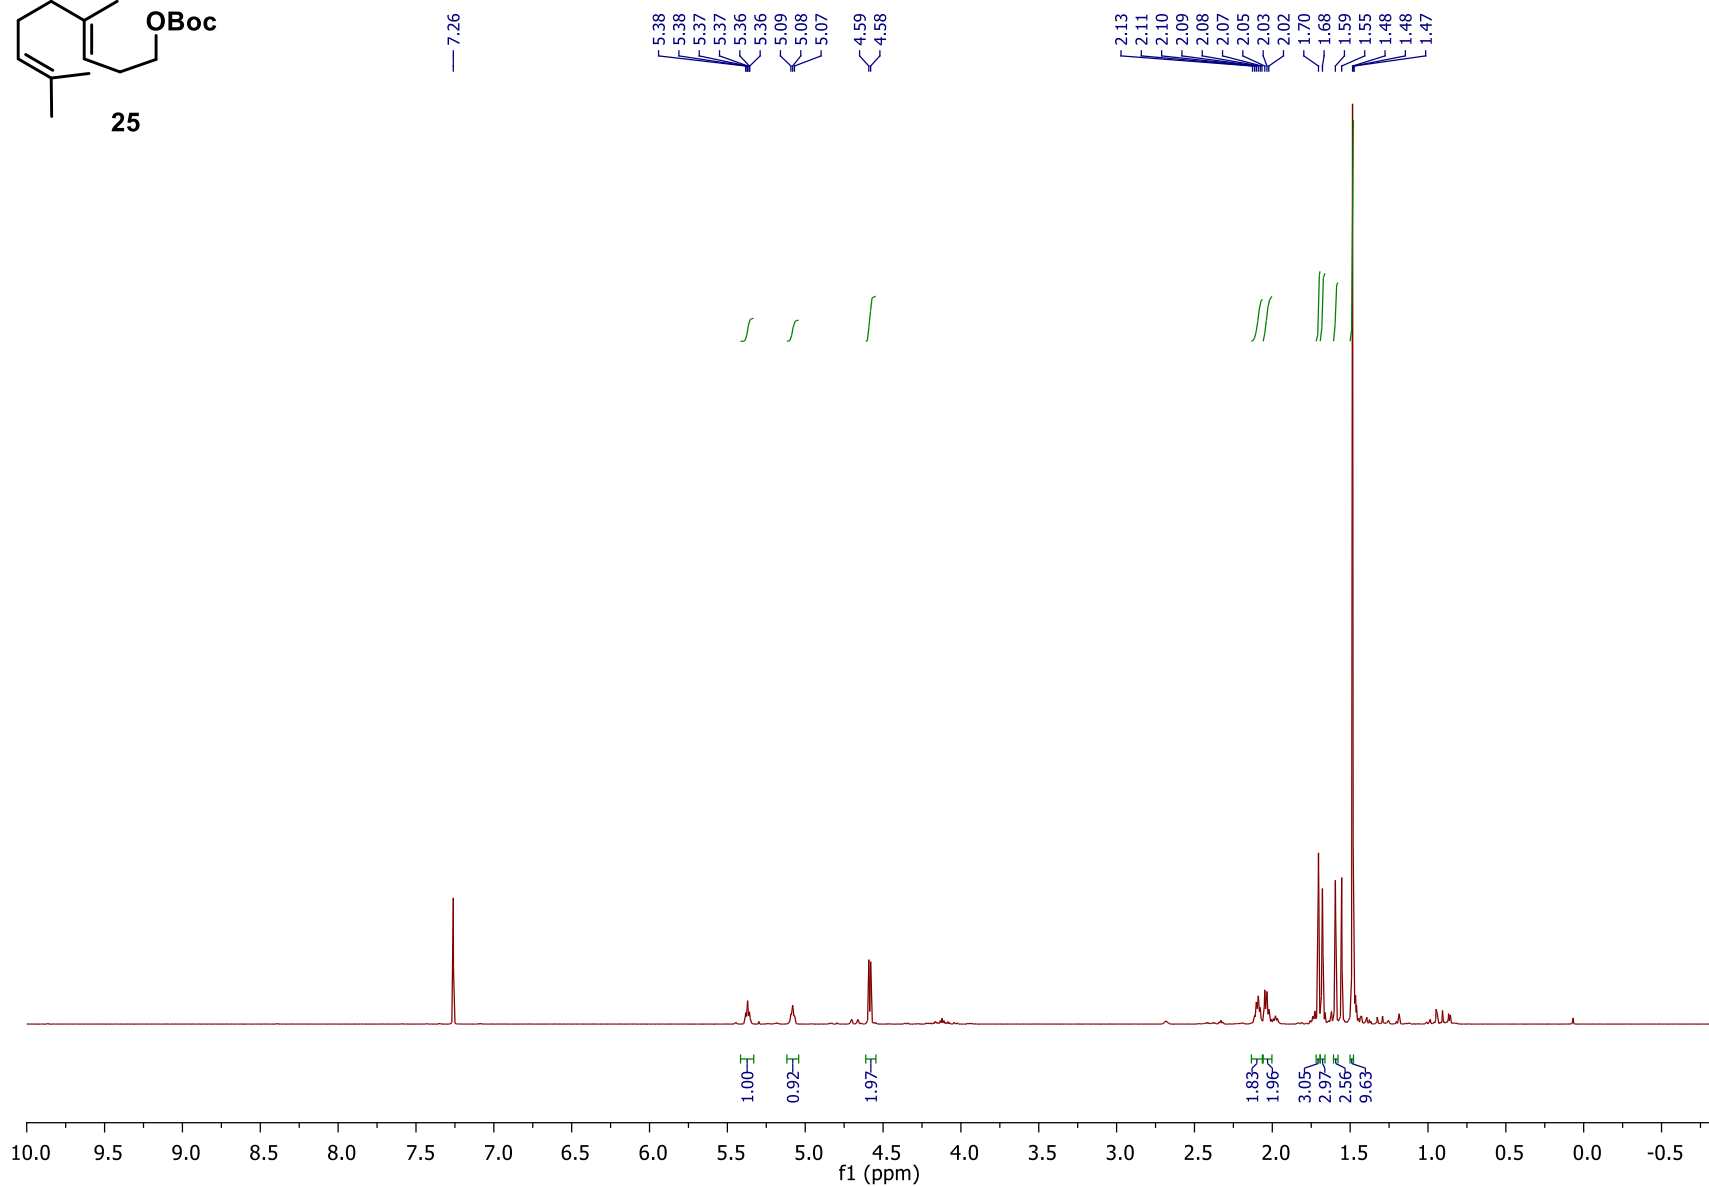

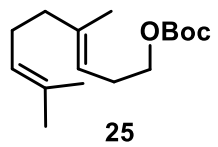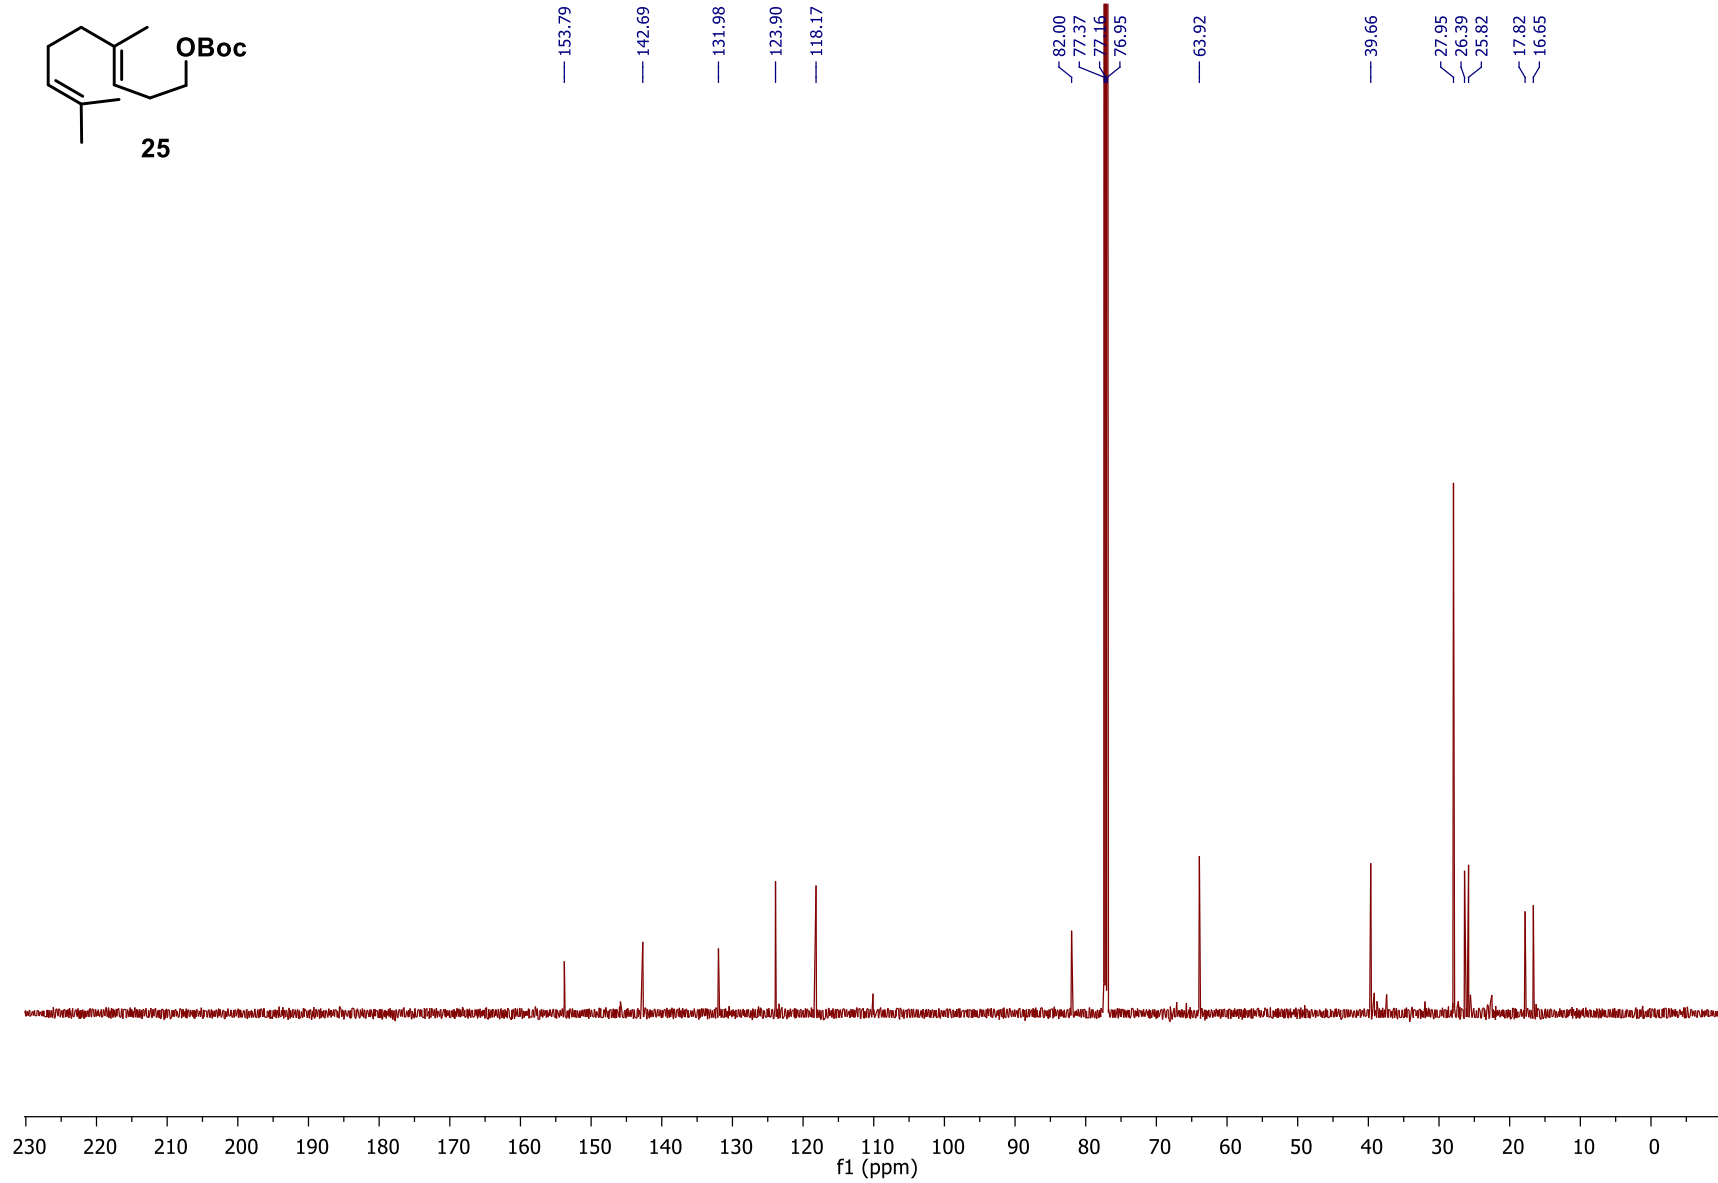

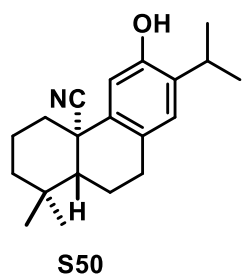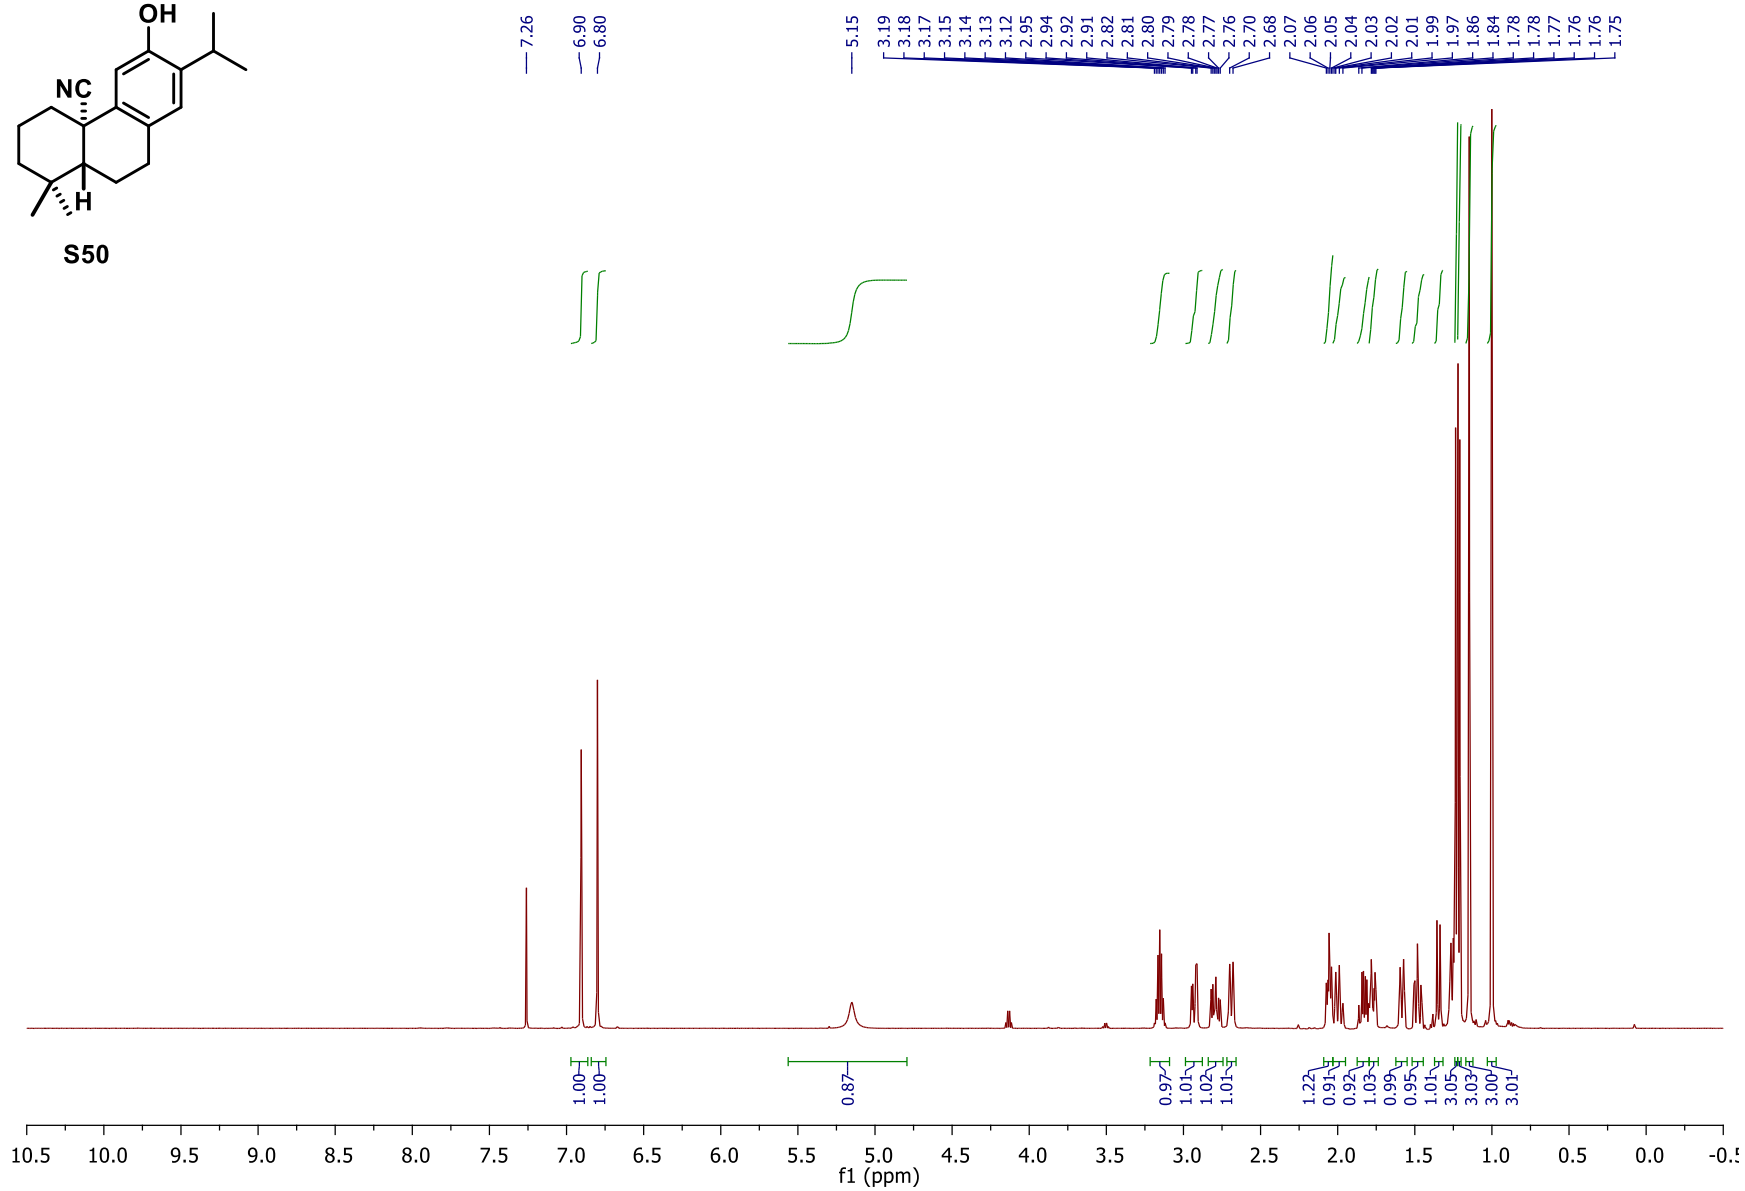



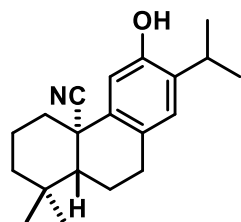

S50

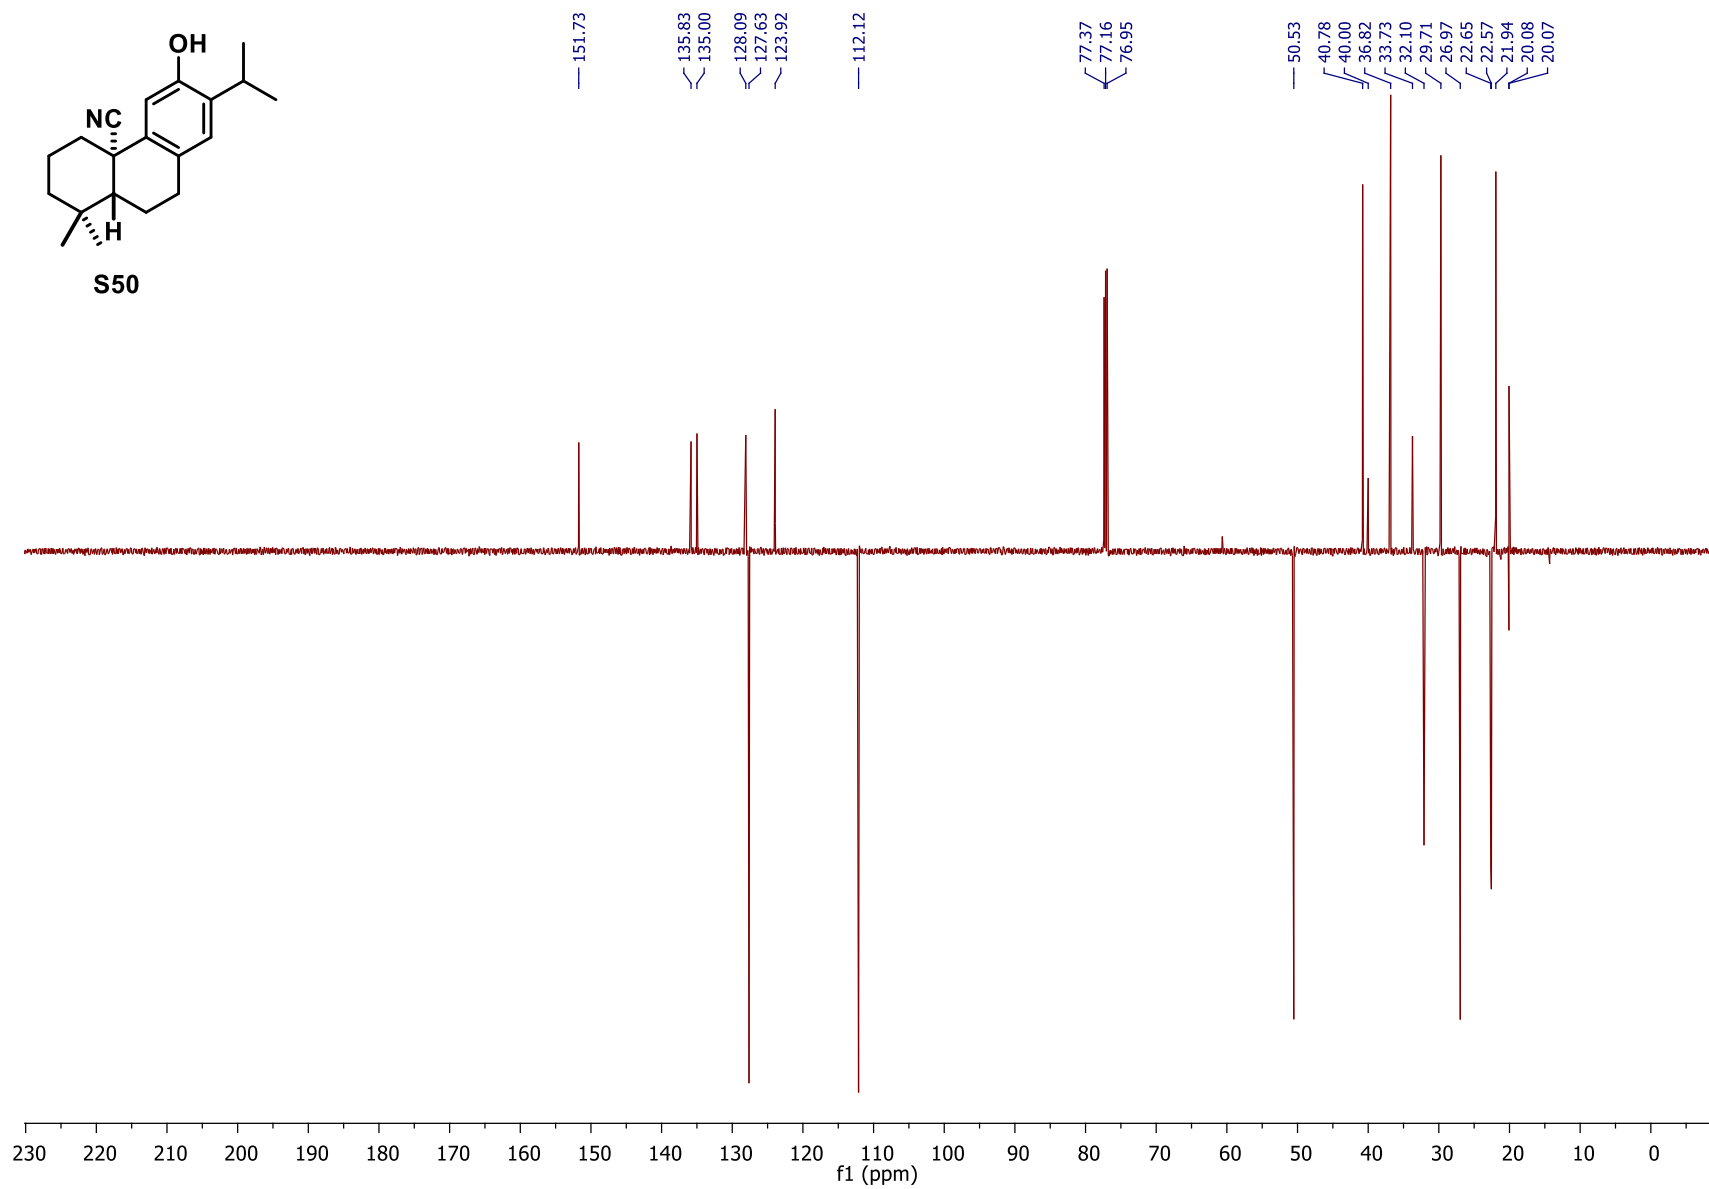

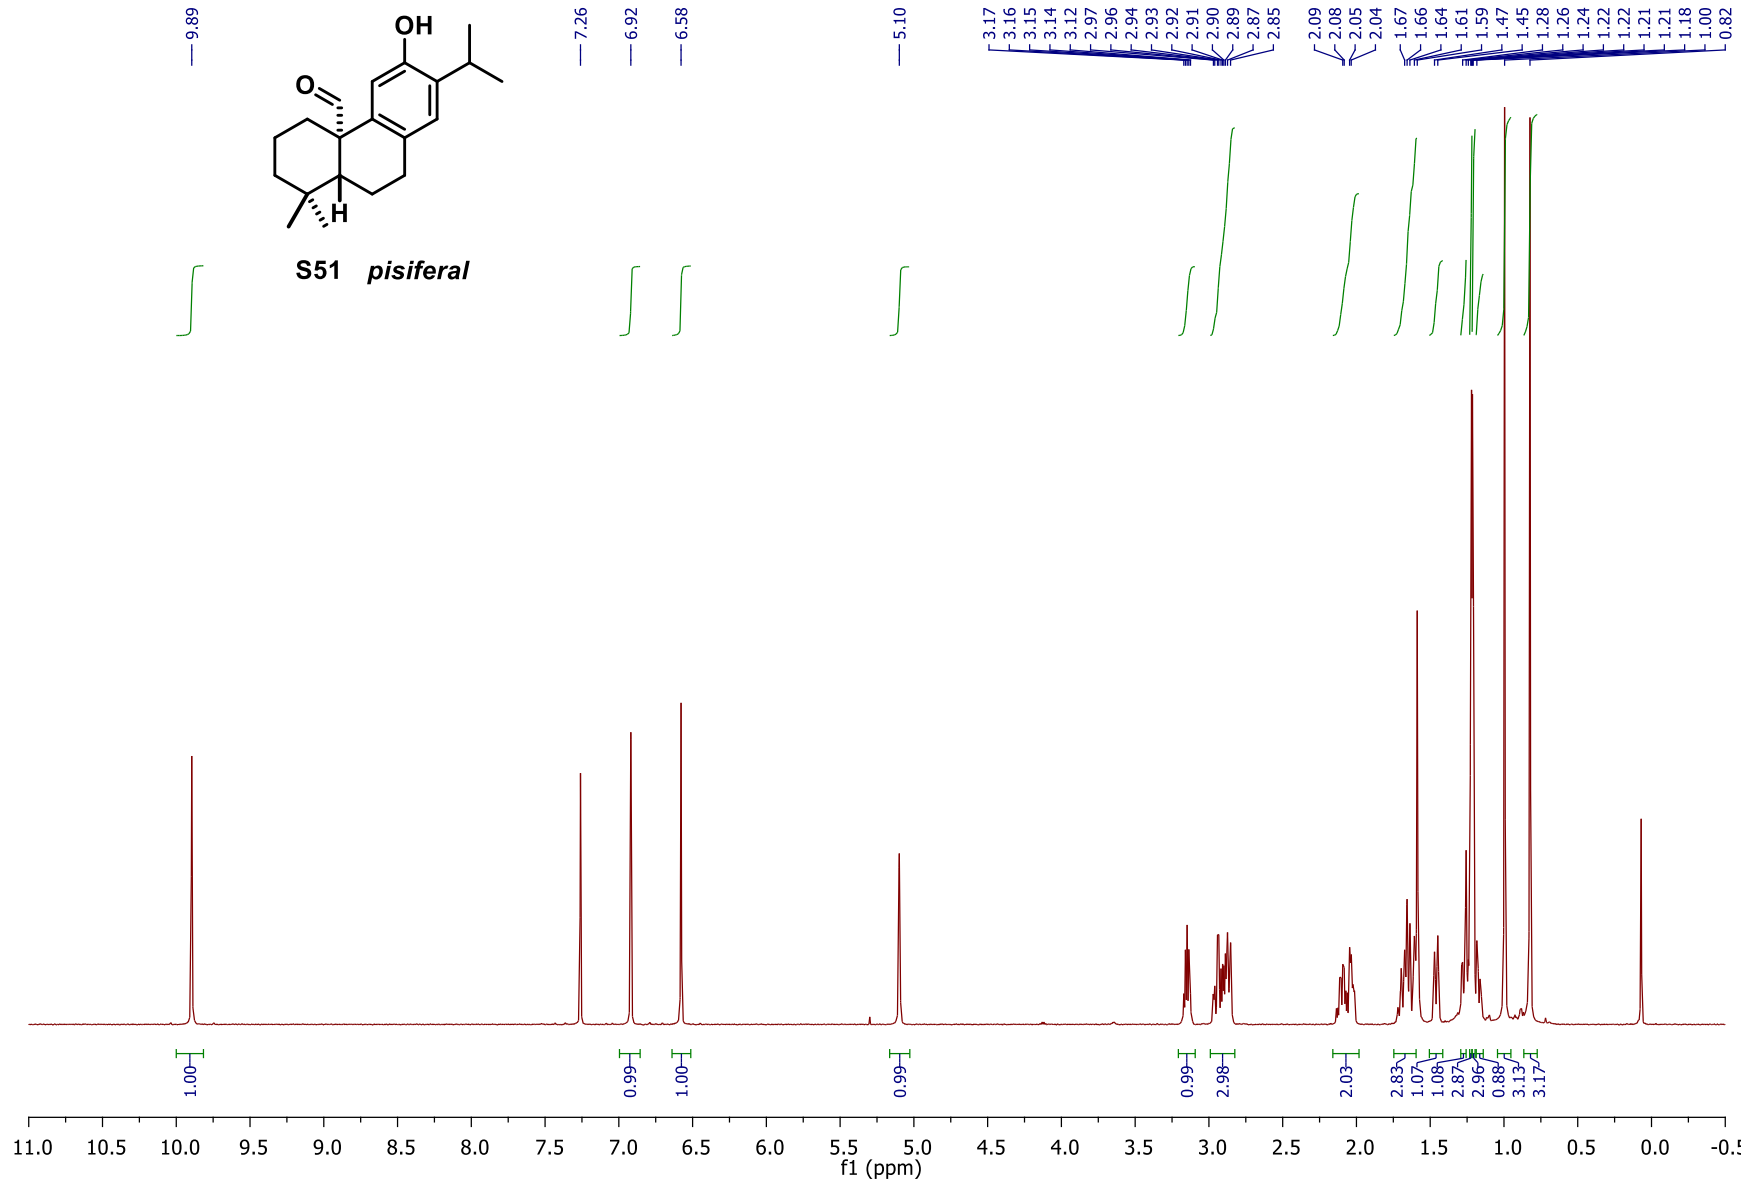

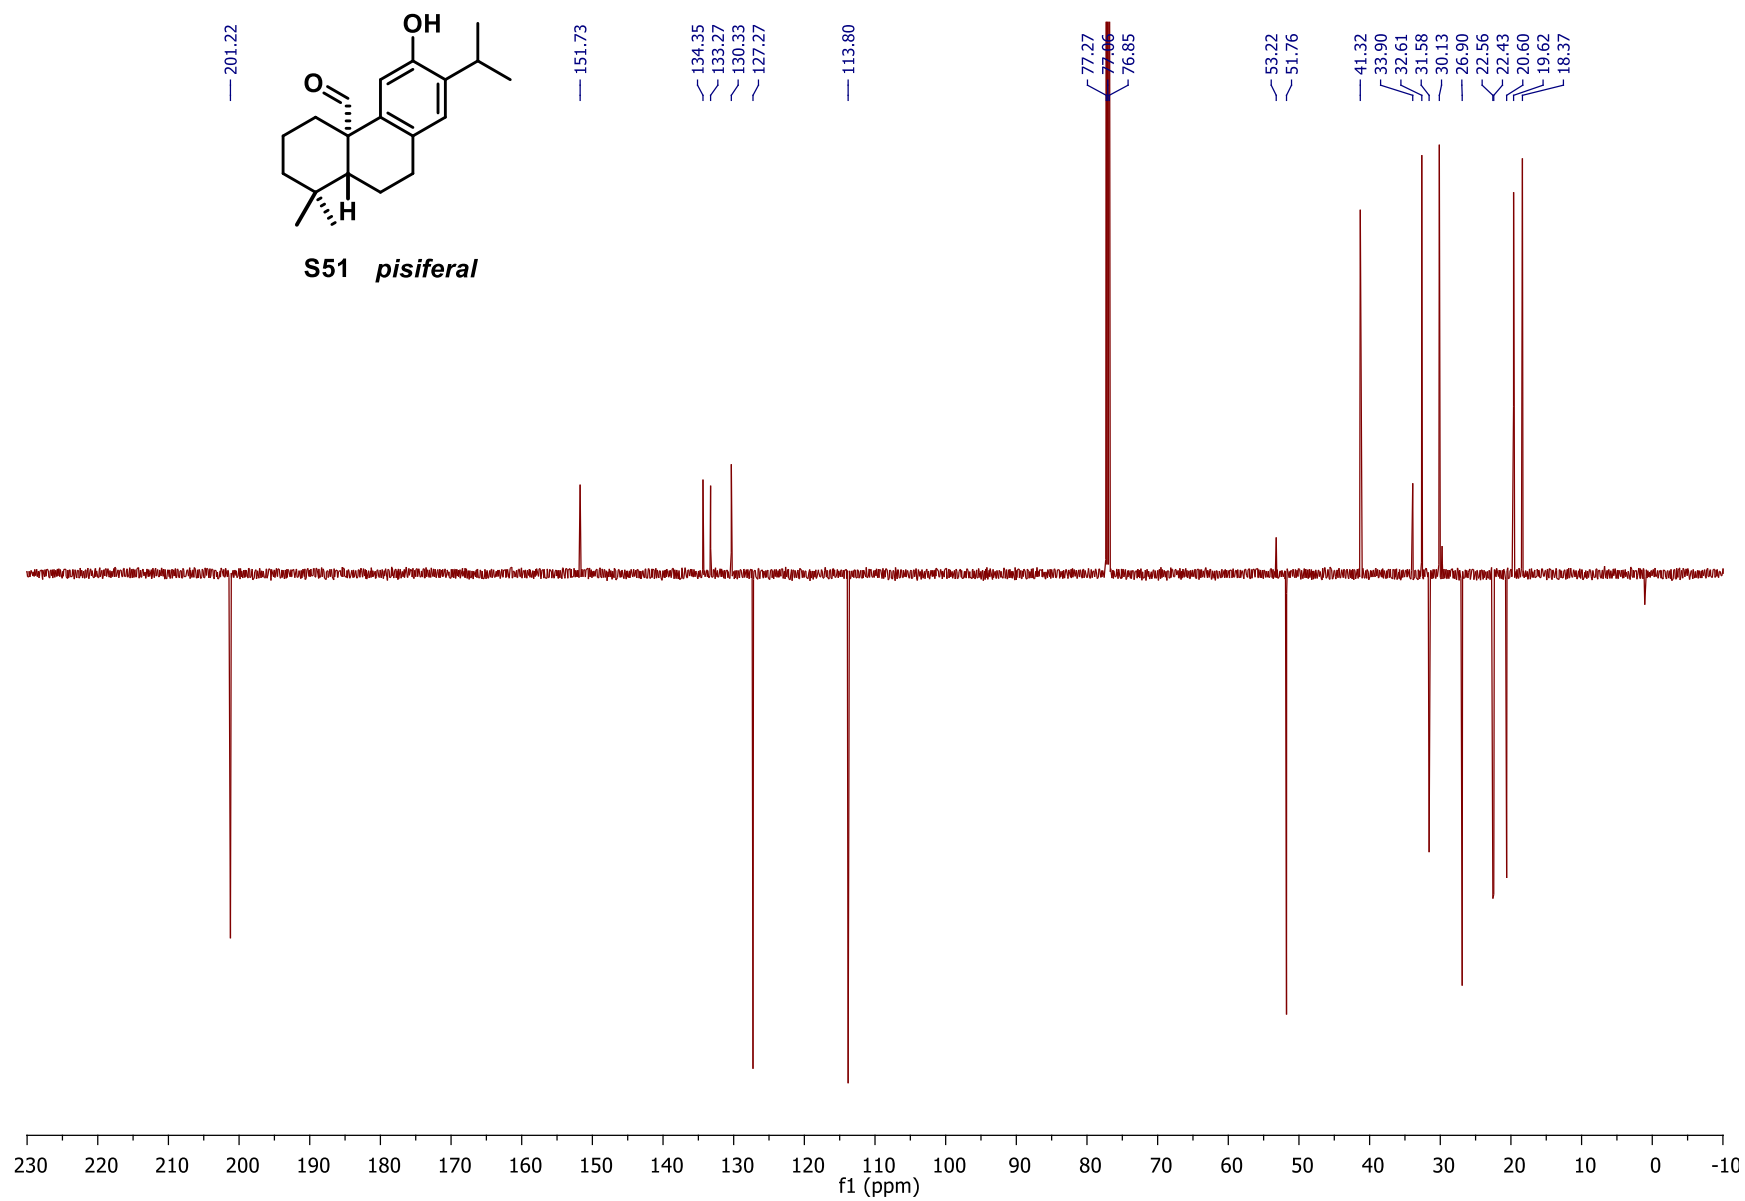

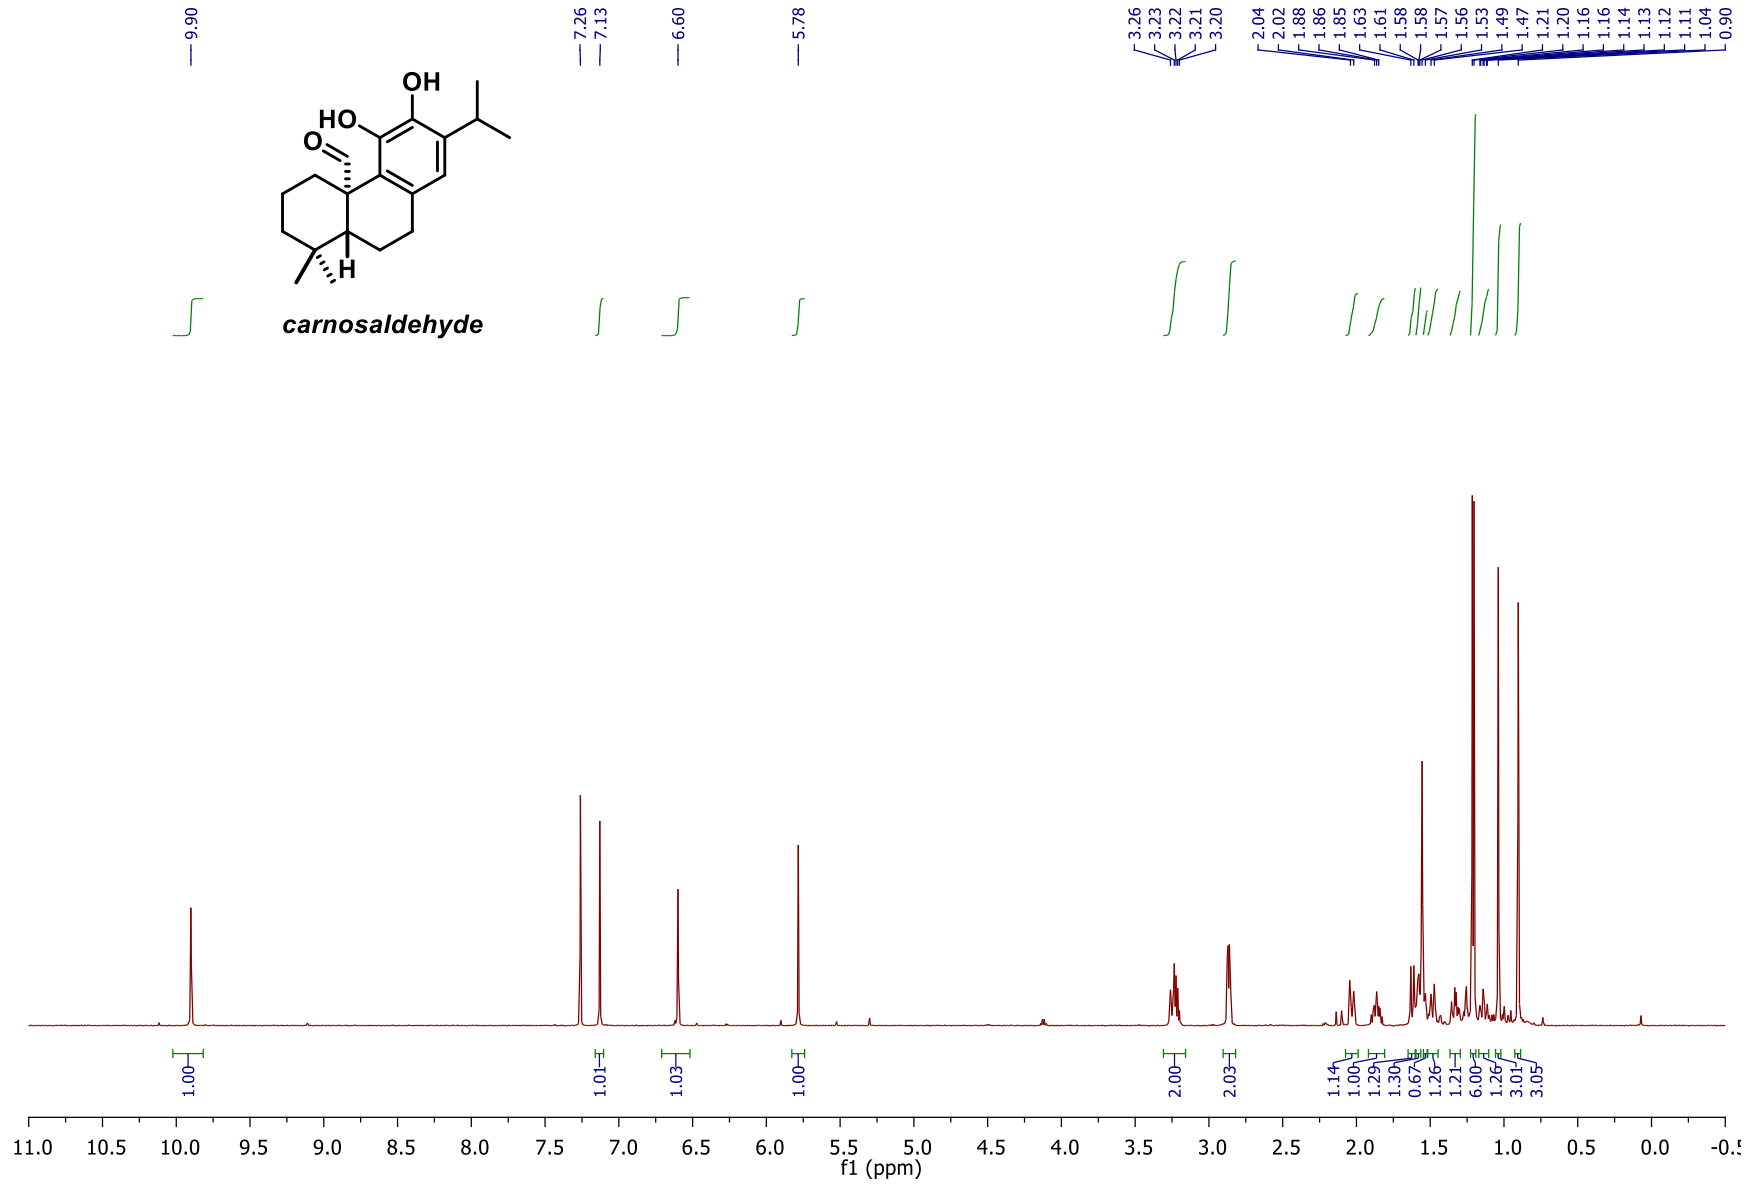

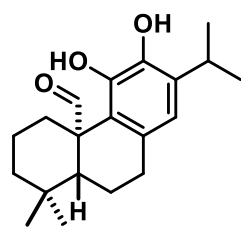

**carnosaldehyde**

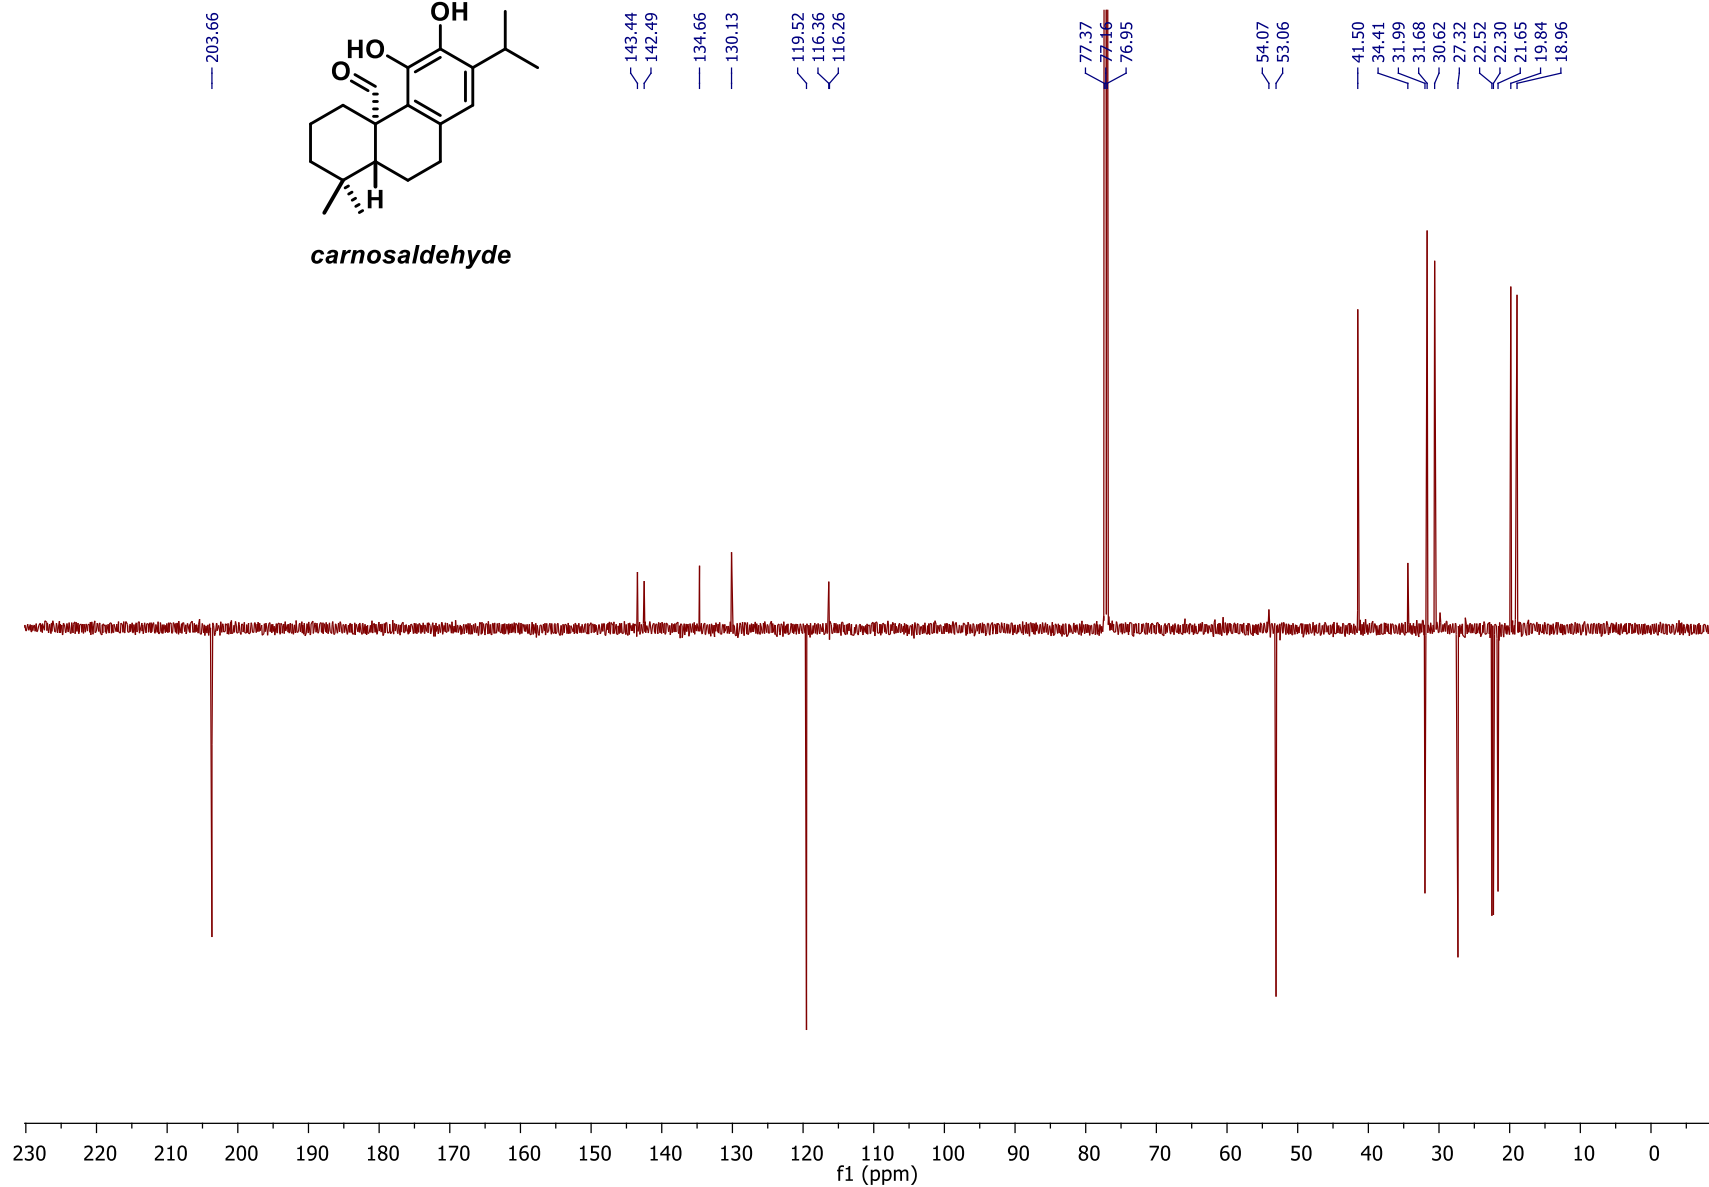

# <sup>1</sup>H COSY

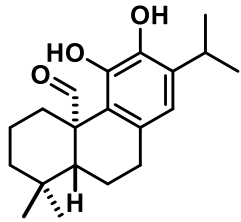

*carnosaldehyde*

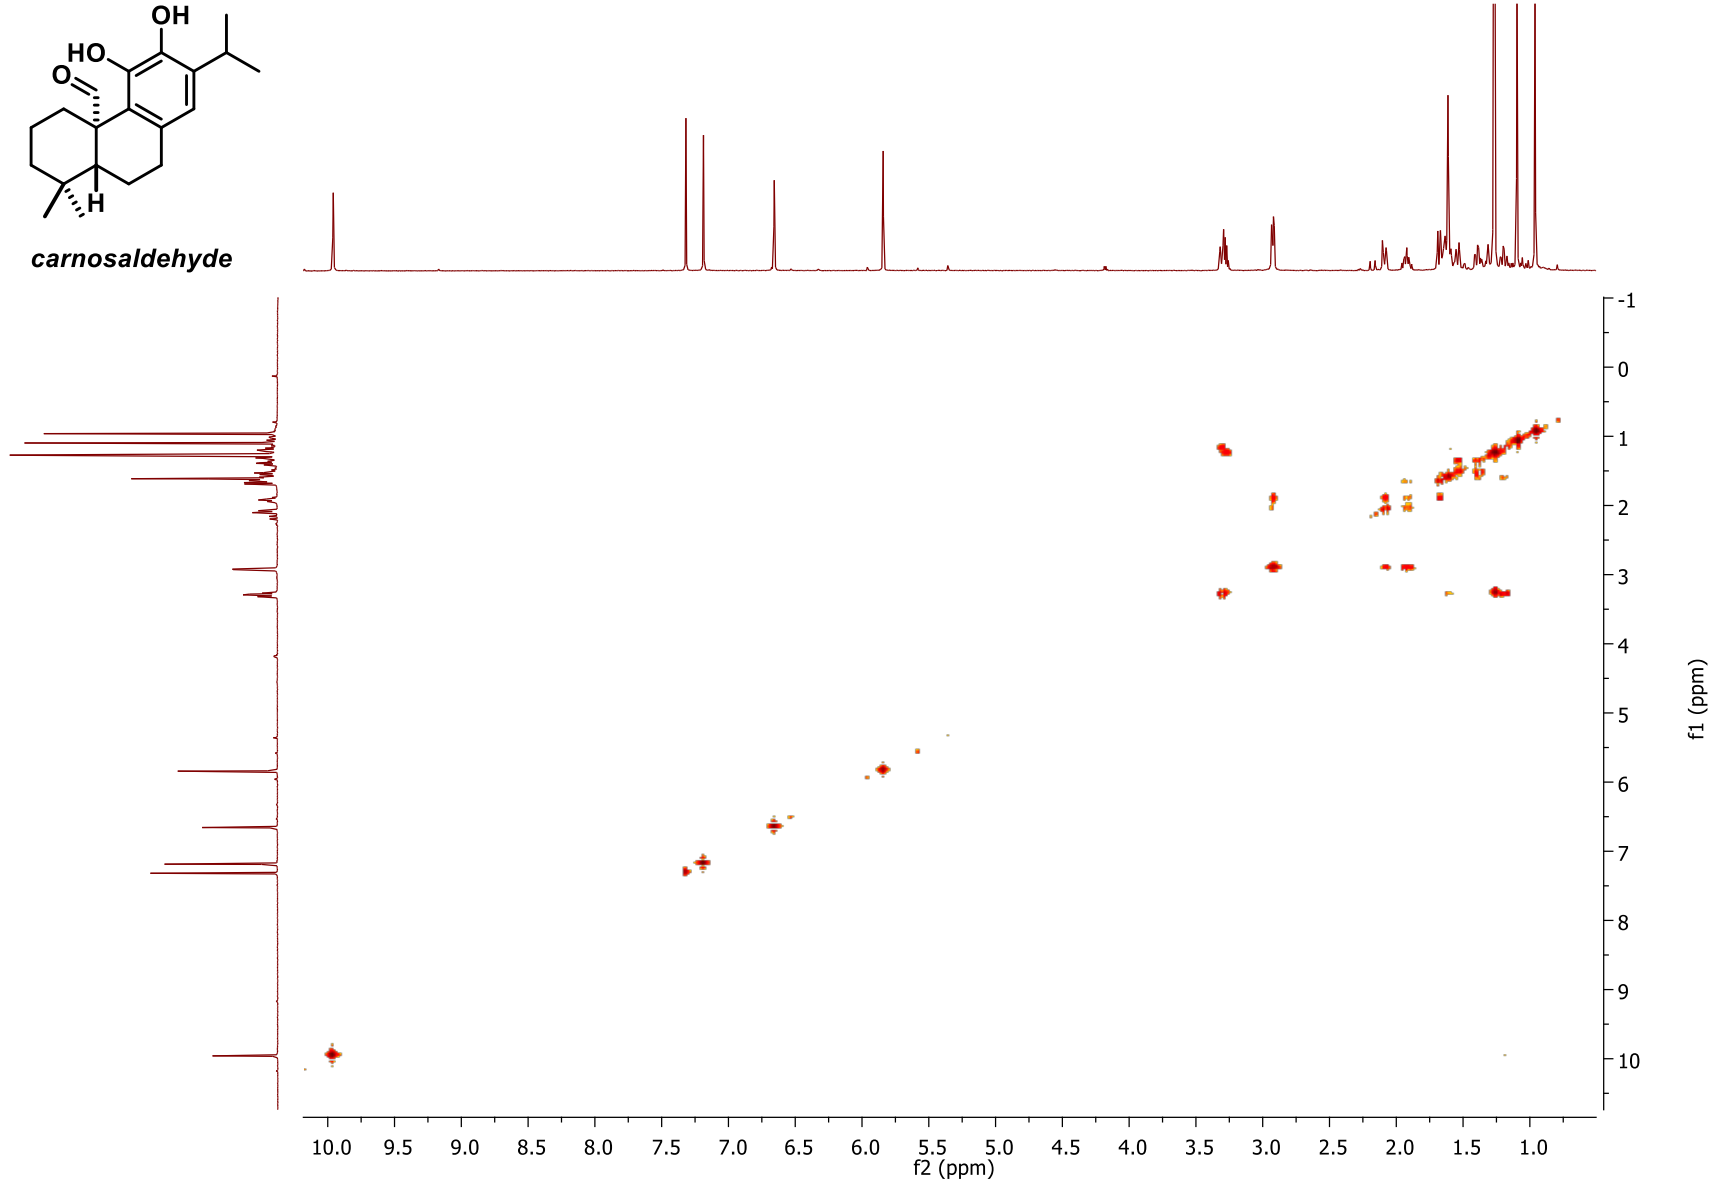

# $^1\text{H}$ COSY

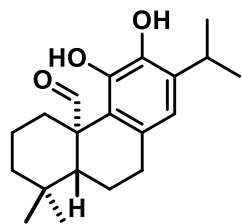

*carnosaldehyde*

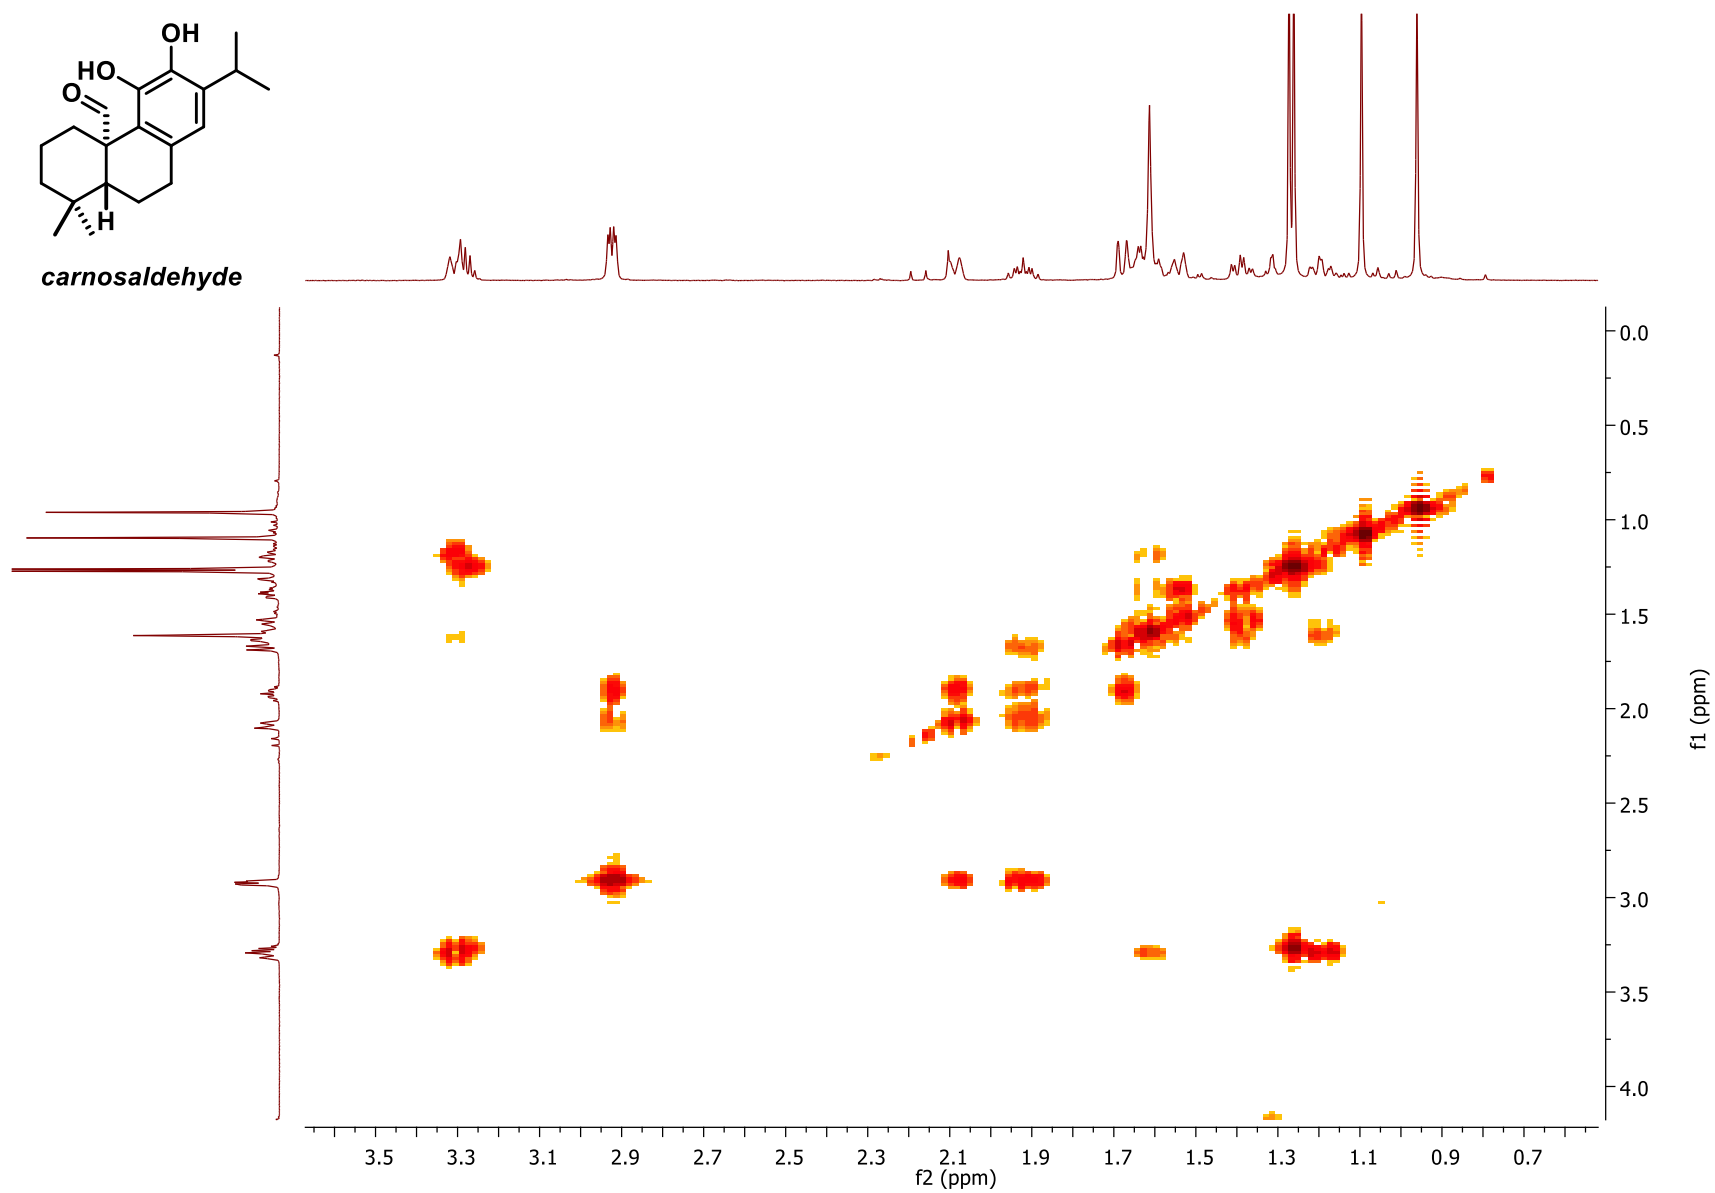

# HSQC

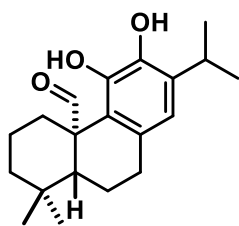

*carnosaldehyde*

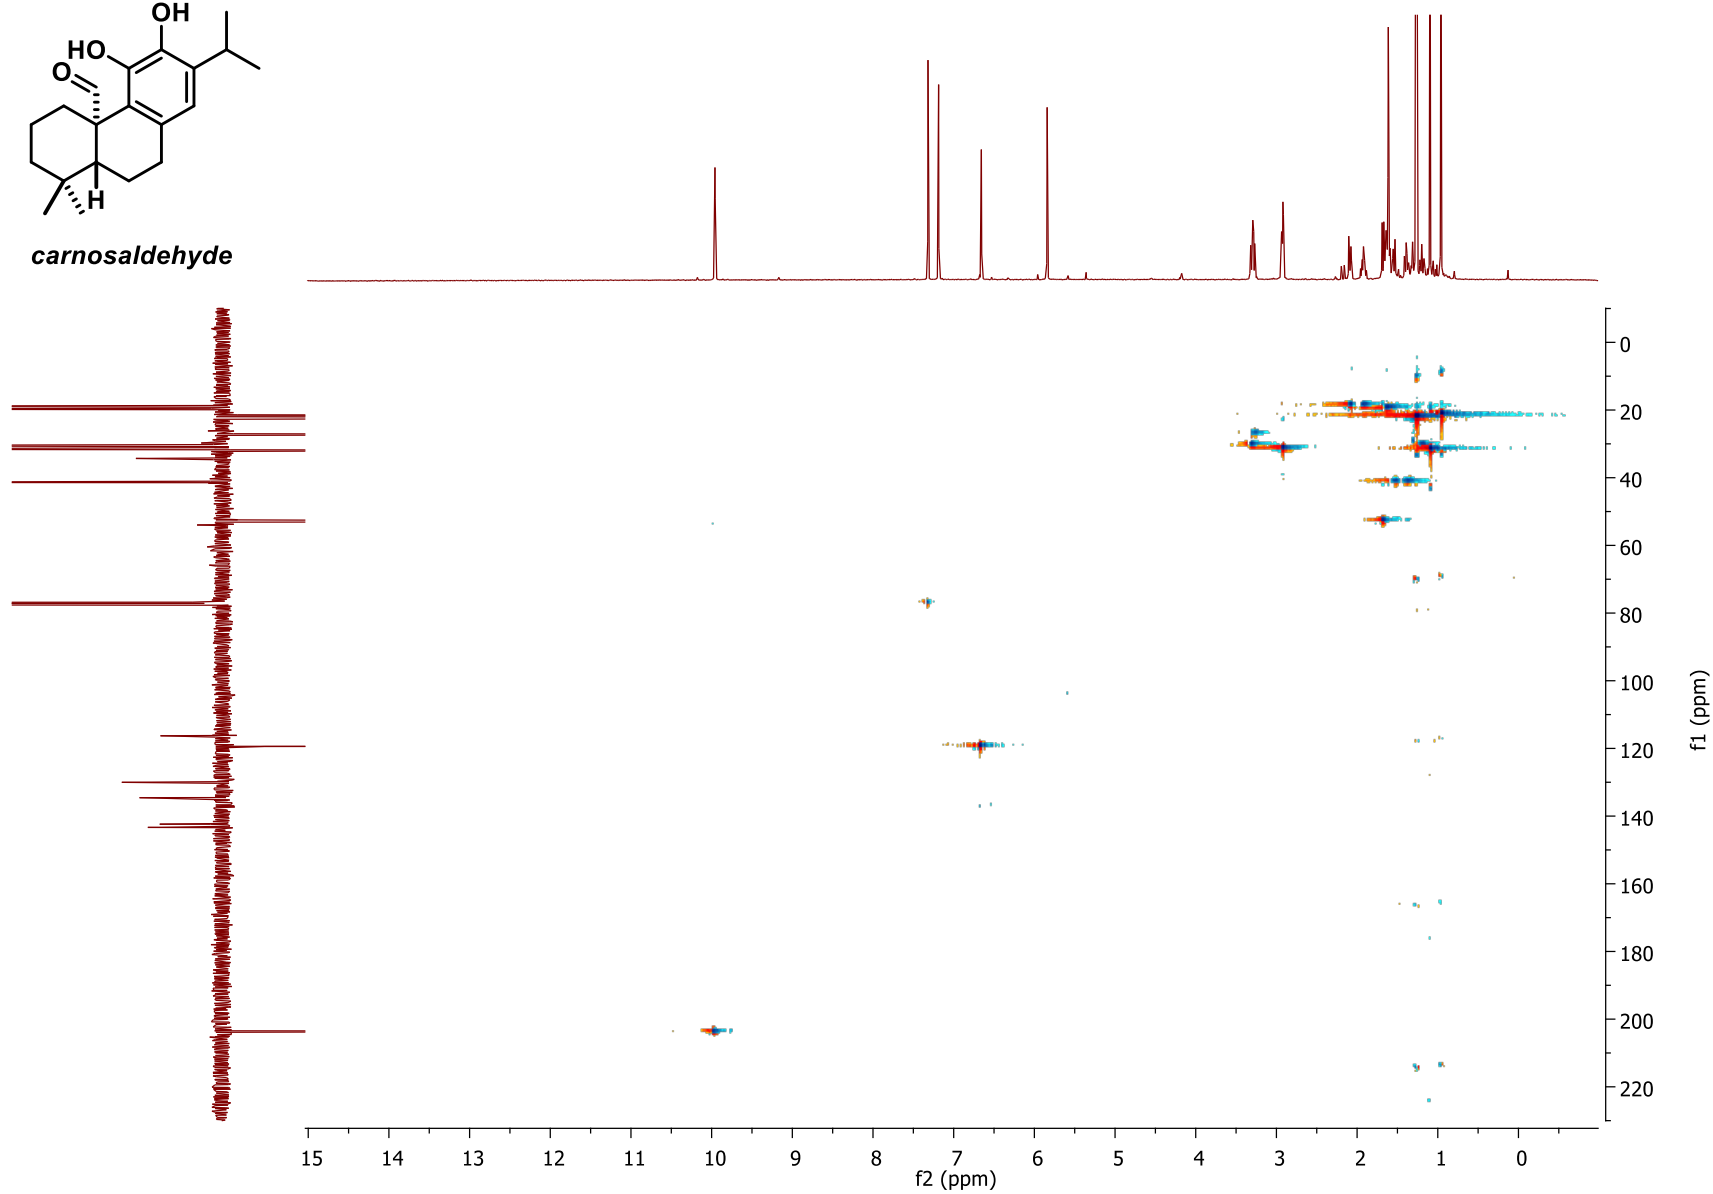



# HSQC

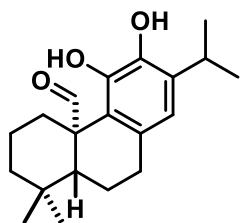

*carnosaldehyde*

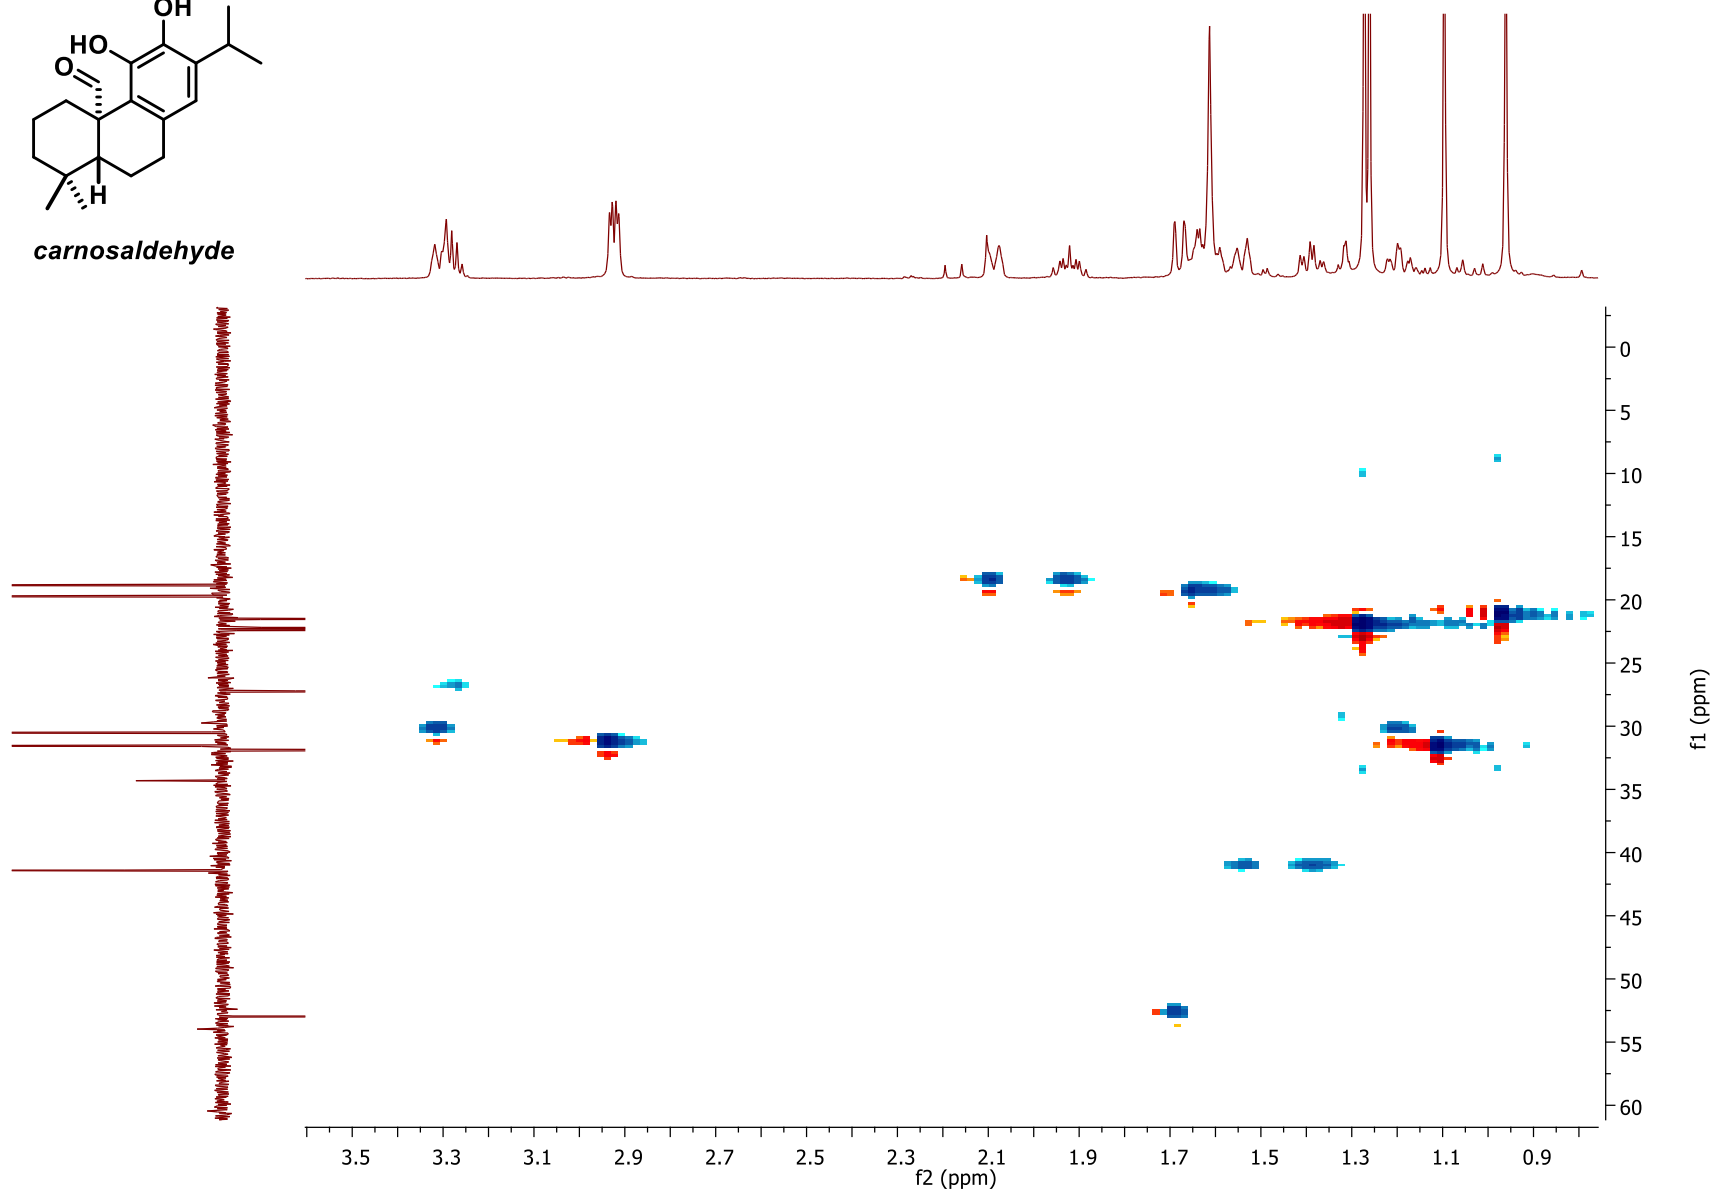

# <sup>1</sup>H NOESY

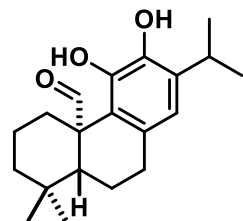

*carnosaldehyde*

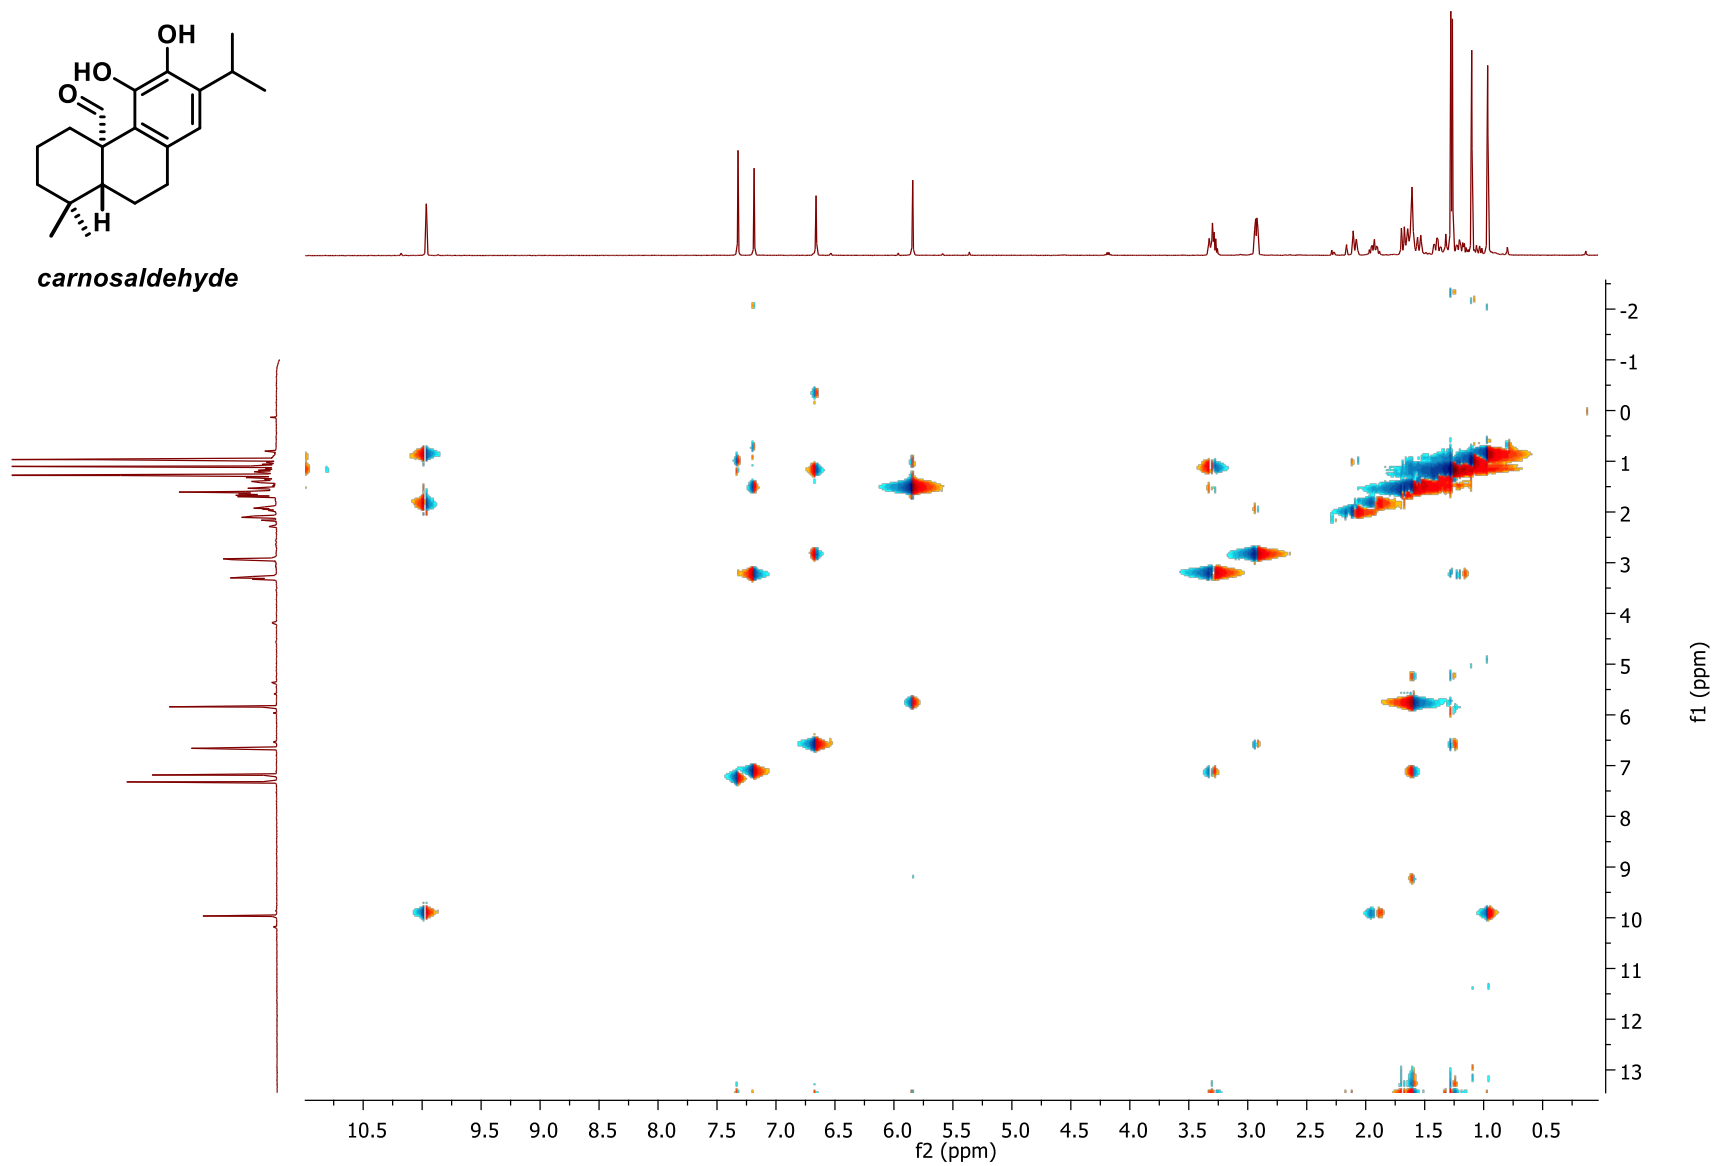

## G. References

- [1] V. Girijavallabhan, A. Arasappan, F. Bennett, K. Chen, Q. Dang, Y. Huang, A. Kerekes, L. Nair, D. Pissarnitski, V. Verma, C. Alvarez, P. Chen, D. Cole, S. Esposito, Y. Huang, Q. Hong, Z. Liu, W. Pan, H. Pu, R. Rossman, Q. Truong, B. Vibulbhan, J. Wang, Z. Zhao, D. Olsen, A. Stamford, S. Bogen, F. G. Njoroge, *Nucleosides, Nucleotides and Nucleic Acids* **2016**, *35*, 277-294.
- [2] F. Doğan, M. Ulusoy, Ö. F. Öztürk, İ. Kaya, B. Salih, *Journal of Thermal Analysis and Calorimetry* **2009**, *98*, 785.
- [3] S. J. Chawner, M. J. Cases-Thomas, J. A. Bull, *European Journal of Organic Chemistry* **2017**, *2017*, 5015-5024.
- [4] S. E. Schaus, B. D. Brandes, J. F. Larrow, M. Tokunaga, K. B. Hansen, A. E. Gould, M. E. Furrow, E. N. Jacobsen, *Journal of the American Chemical Society* **2002**, *124*, 1307-1315.
- [5] M. Zendejdel, H. Khanmohamadi, M. Mokhtari, *Journal of the Chinese Chemical Society* **2010**, *57*, 205-212.
- [6] R. C. Larock, H. Yang, S. M. Weinreb, R. J. Herr, *The Journal of Organic Chemistry* **1994**, *59*, 4172-4178.
- [7] M. Dai, I. J. Krauss, S. J. Danishefsky, *The Journal of Organic Chemistry* **2008**, *73*, 9576-9583.
- [8] D. M. B. Hickey, P. D. Leeson, R. Novelli, V. P. Shah, B. E. Burpitt, L. P. Crawford, B. J. Davies, M. B. Mitchell, K. D. Pancholi, D. Tuddenham, N. J. Lewis, C. O'Farrell, *Journal of the Chemical Society, Perkin Transactions 1* **1988**, 3103-3111.
- [9] S. P. Nikas, G. A. Thakur, A. Makriyannis, *Synthetic Communications* **2002**, *32*, 1751-1756.
- [10] G. Satyanarayana, M. E. Maier, *Tetrahedron* **2012**, *68*, 1745-1749.
- [11] G. Satyanarayana, M. E. Maier, *Organic Letters* **2008**, *10*, 2361-2364.
- [12] M. Fridén-Saxin, N. Pemberton, K. da Silva Andersson, C. Dyrager, A. Friberg, M. Grøtli, K. Luthman, *The Journal of Organic Chemistry* **2009**, *74*, 2755-2759.
- [13] J. Panther, A. Röhrich, T. J. J. Müller, *ARKIVOC: Online Journal of Organic Chemistry* **2012**, 297-311.
- [14] H. Zhao, M.-Z. Cai, R.-H. Hu, C.-S. Song, *Synthetic Communications* **2001**, *31*, 3665-3669.
- [15] M. van Gemmeren, M. Börjesson, A. Tortajada, S.-Z. Sun, K. Okura, R. Martin, *Angewandte Chemie International Edition* **2017**, *56*, 6558-6562.
- [16] M. R. Gesinski, K. Tadpetch, S. D. Rychnovsky, *Organic Letters* **2009**, *11*, 5342-5345.
- [17] X. Chen, Y. Zhang, H. Wan, W. Wang, S. Zhang, *Chemical Communications* **2016**, *52*, 3532-3535.
- [18] N. P. Botting, A. A. B. Robertson, J. J. Morrison, *Journal of Labelled Compounds and Radiopharmaceuticals* **2007**, *50*, 260-263.
- [19] W. Cao, H. Deng, Y. Sun, B. Liu, S. Qin, *Chemistry – A European Journal* **2018**, *24*, 9120-9129.
- [20] Y. Kim, P. L. Fuchs, *Organic Letters* **2007**, *9*, 2445-2448.
- [21] V. P. Demertzidou, S. Pappa, V. Sarli, A. L. Zografos, *The Journal of Organic Chemistry* **2017**, *82*, 8710-8715.
- [22] N. D. Ungur, N. P. Popa, N. Van Tuen, P. F. Vlad, *Chemistry of Natural Compounds* **1993**, *29*, 473-478.
- [23] S. E. Michalak, S. Nam, D. M. Kwon, D. A. Horne, C. D. Vanderwal, *Journal of the American Chemical Society* **2019**, *141*, 9202-9206.

- [24] T. B. Lanni, K. L. Greene, C. N. Kolz, K. S. Para, M. Visnick, J. L. Mobley, D. T. Dudley, T. J. Baginski, M. B. Liimatta, *Bioorganic & Medicinal Chemistry Letters* **2007**, *17*, 756-760.
- [25] M. E. Kopach, A. H. Fray, A. I. Meyers, *Journal of the American Chemical Society* **1996**, *118*, 9876-9883.
- [26] E.-i. Negishi, J. P. Maye, D. Choueiry, *Tetrahedron* **1995**, *51*, 4447-4462.
- [27] L. Novák, L. Poppe, C. Szántay, É. Szabó, *Synthesis* **1985**, *1985*, 939-941.
- [28] T. Kametani, H. Kondoh, M. Tsubuki, T. Honda, *Journal of the Chemical Society, Perkin Transactions 1* **1990**, 5-10.
- [29] K. Ishihara, H. Ishibashi, H. Yamamoto, *Journal of the American Chemical Society* **2002**, *124*, 3647-3655.
- [30] A. Crusco, C. Bordoni, A. Chakroborty, K. C. L. Whatley, H. Whiteland, A. D. Westwell, K. F. Hoffmann, *European Journal of Medicinal Chemistry* **2018**, *152*, 87-100.
- [31] B. M. Trost, S. Malhotra, W. H. Chan, *Journal of the American Chemical Society* **2011**, *133*, 7328-7331.
- [32] L. C. Pati, D. Mukherjee, *Tetrahedron Letters* **2004**, *45*, 9451-9453.
- [33] J. T. Fishedick, M. Standiford, D. A. Johnson, J. A. Johnson, *Bioorganic & Medicinal Chemistry* **2013**, *21*, 2618-2622.
